# Supplementary material for: Treatment with brivaracetam has no apparent long‐term effects on body weight in pediatric patients with epilepsy
Source: PubMed Central journal article supplement (PMC11633704; doi:10.1002/epi4.13045), 2024-10-02

# **Treatment with brivaracetam has no apparent long-term effects on body weight in pediatric patients with epilepsy**

**Florin I. Floricel | Paula E. Reichel | Najla Dickson | Sofia Fleyshman | Christoph Reichel | Jan-Peer Elshoff**

## **Individual patient data for weight and BMI over time**

Vertical line indicates 6 months of exposure to BRV on the N01266 study.

Abbreviations: BMI, body mass index; BRV, brivaracetam.

Patient Number: 1  
Seizure History: Partial Onset Seizures

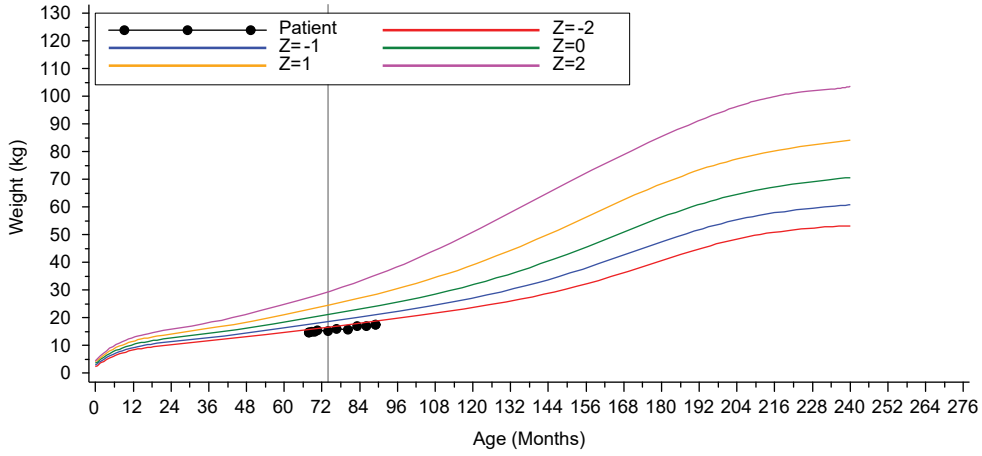

Patient Number: 1  
Seizure History: Partial Onset Seizures

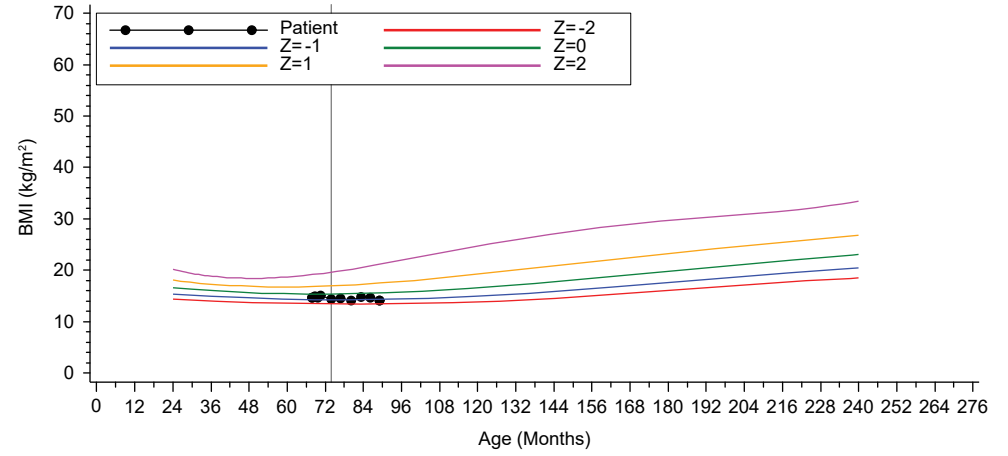

Patient Number: 2  
Seizure History: Partial Onset Seizures

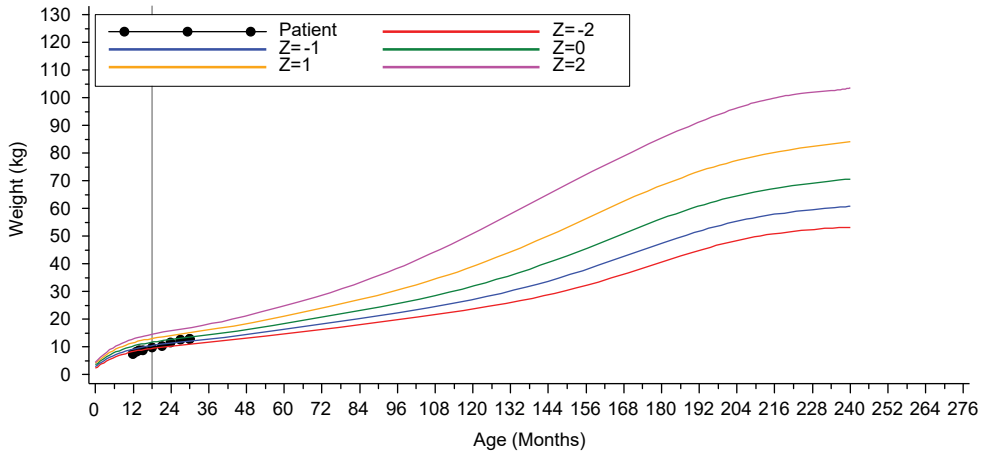

Patient Number: 2  
Seizure History: Partial Onset Seizures

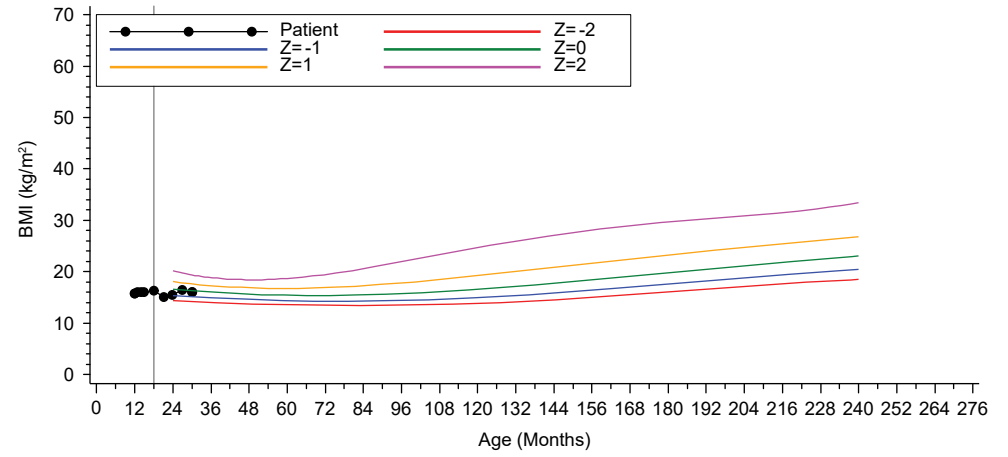

Patient 3  
Seizure History: Partial Onset Seizures

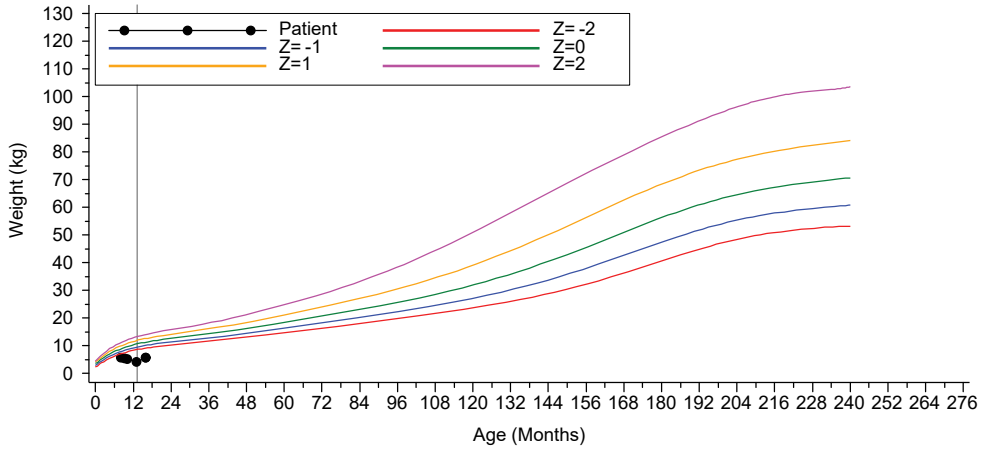

Patient 3  
Seizure History: Partial Onset Seizures

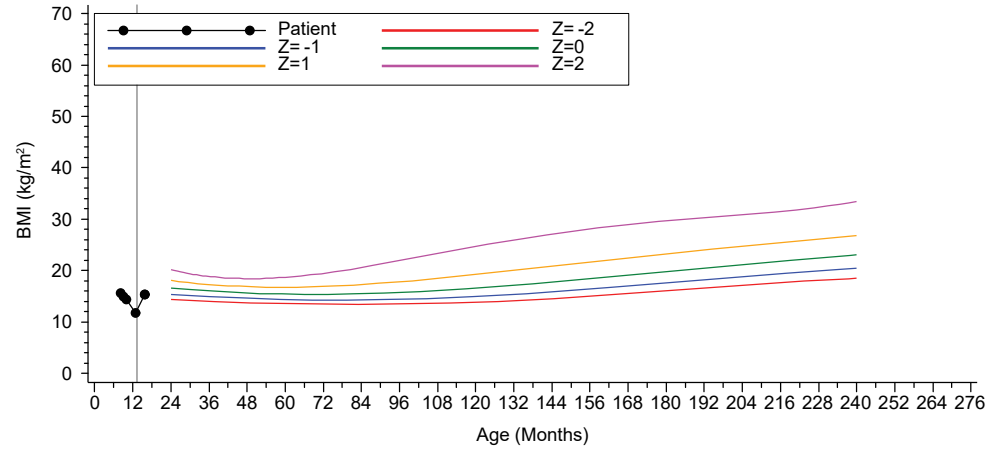

Patient 4  
Seizure History: Partial Onset Seizures

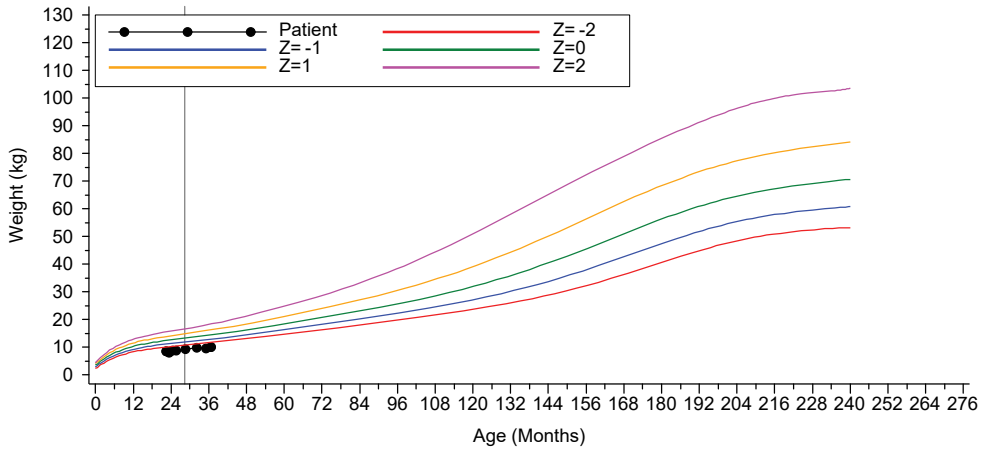

Patient 4  
Seizure History: Partial Onset Seizures

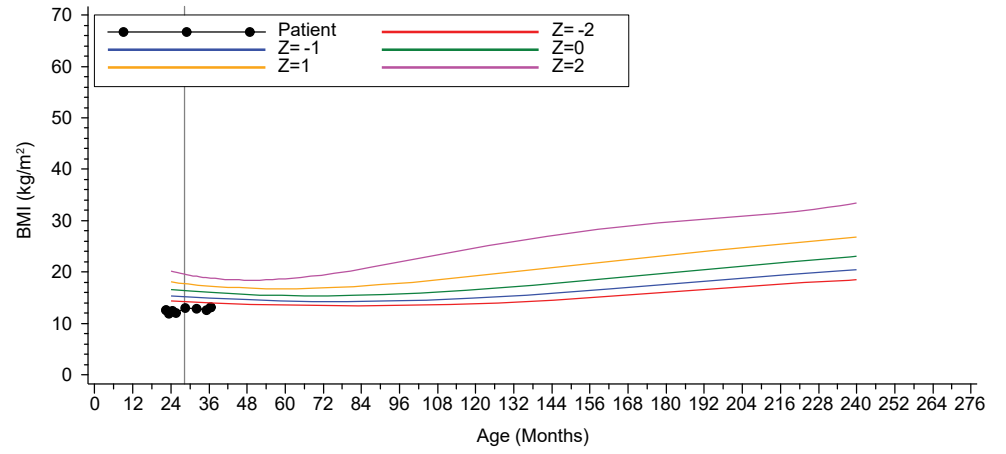

Patient 5  
Seizure History: Partial Onset Seizures

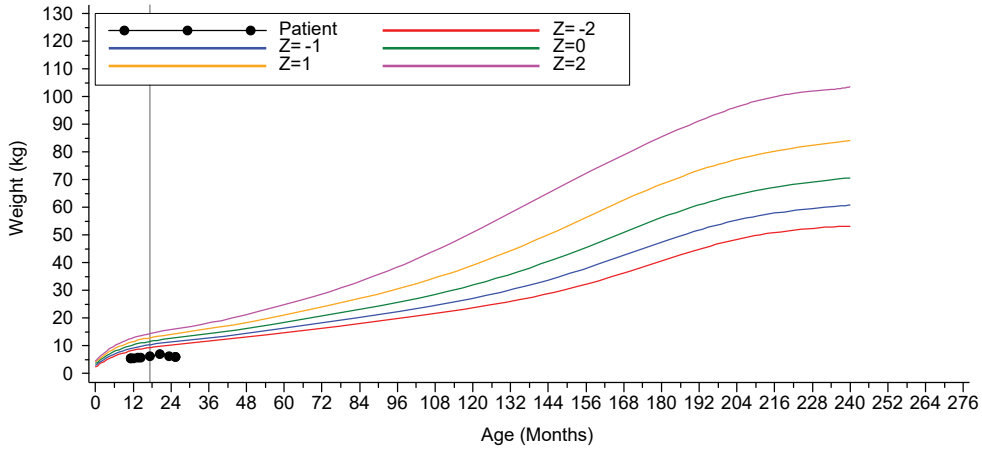

Patient 5  
Seizure History: Partial Onset Seizures

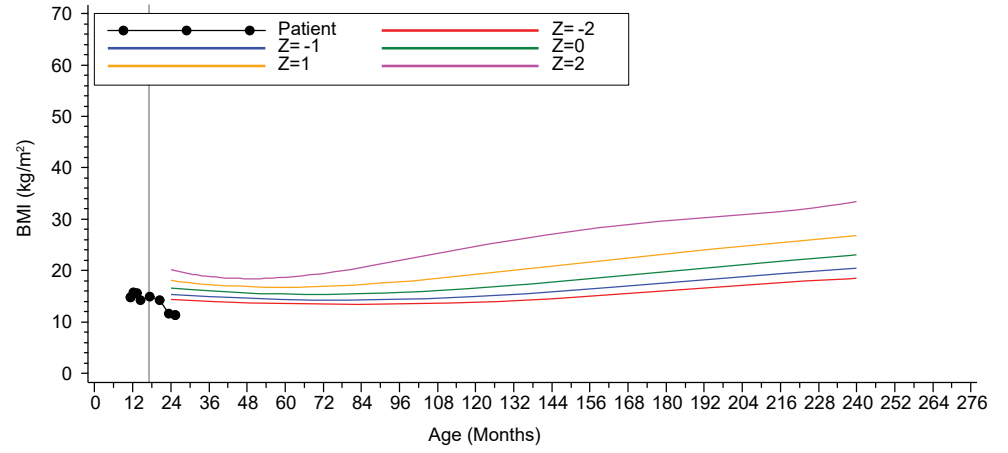

Patient 6  
Seizure History: Partial Onset Seizures

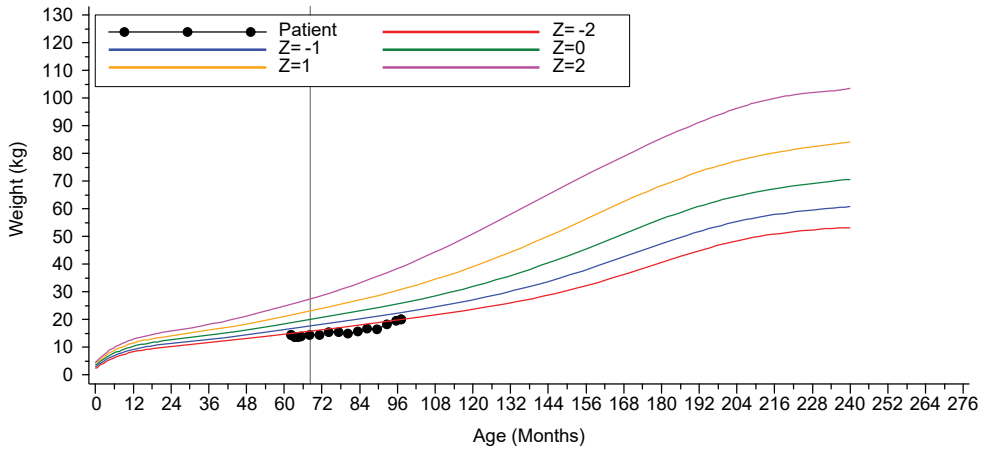

Patient 6  
Seizure History: Partial Onset Seizures

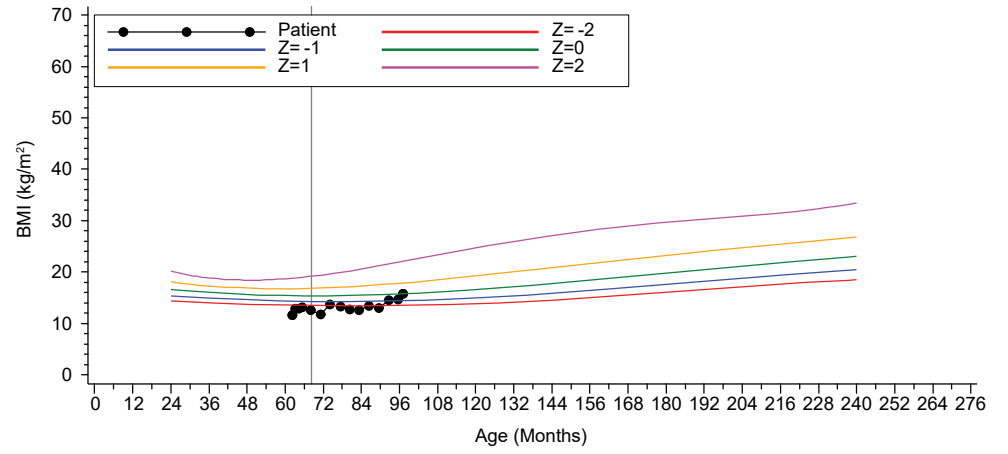

Patient 7  
Seizure History: Partial Onset Seizures

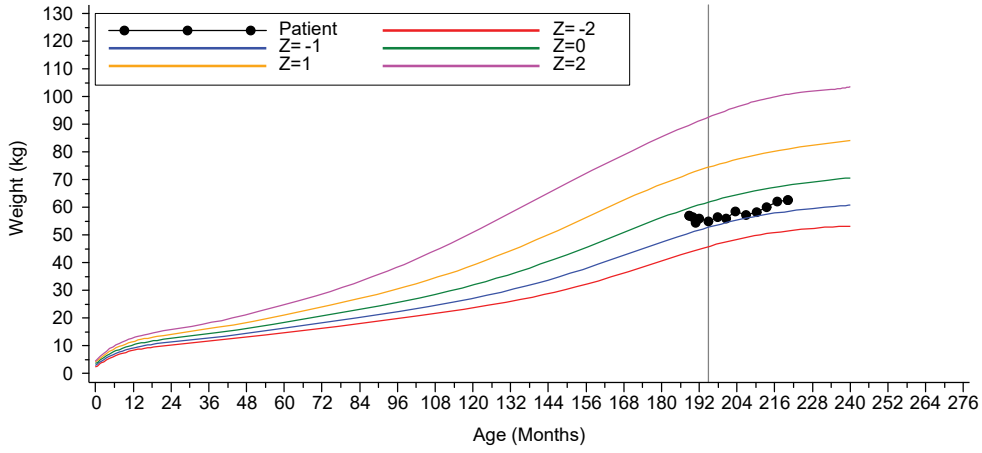

Patient 7  
Seizure History: Partial Onset Seizures

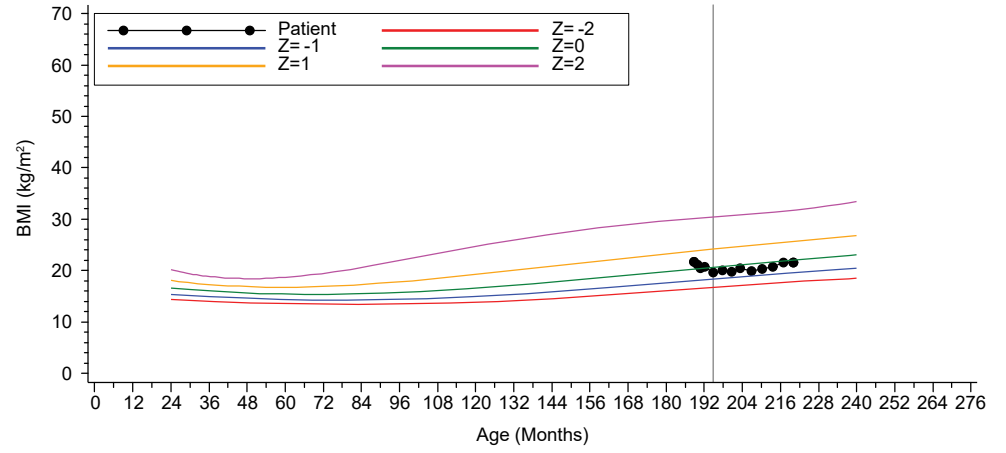

Patient 8  
Seizure History: Partial Onset Seizures

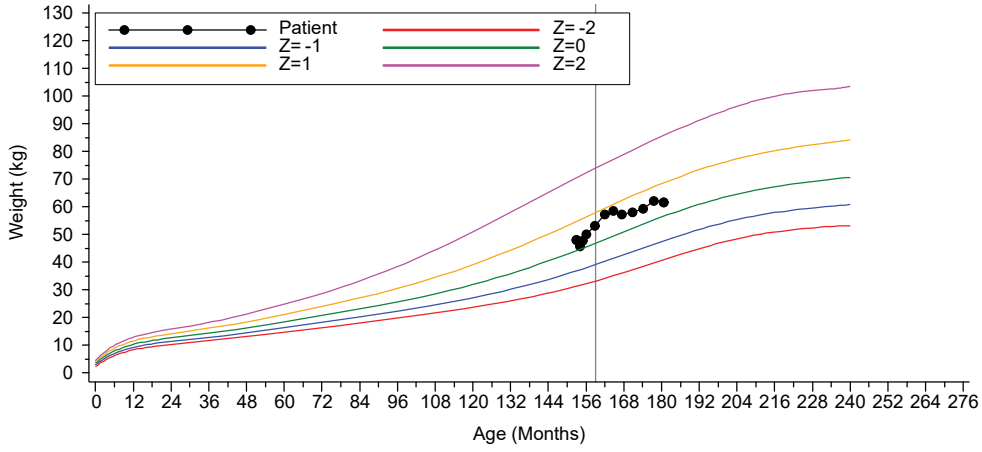

Patient 8  
Seizure History: Partial Onset Seizures

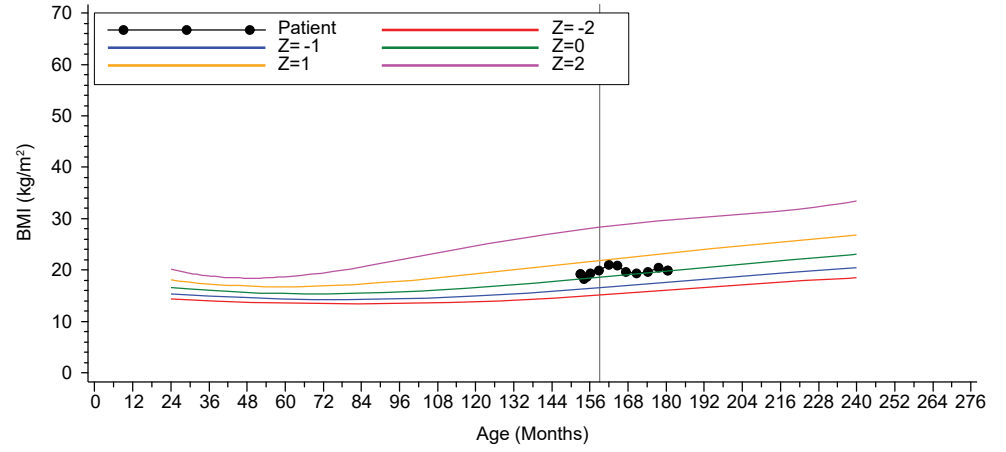

Patient 9  
Seizure History: Partial Onset Seizures

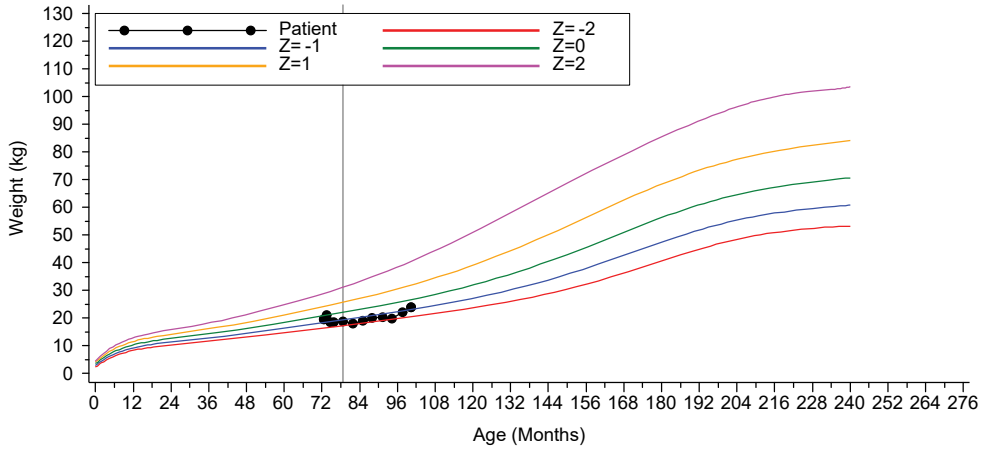

Patient 9  
Seizure History: Partial Onset Seizures

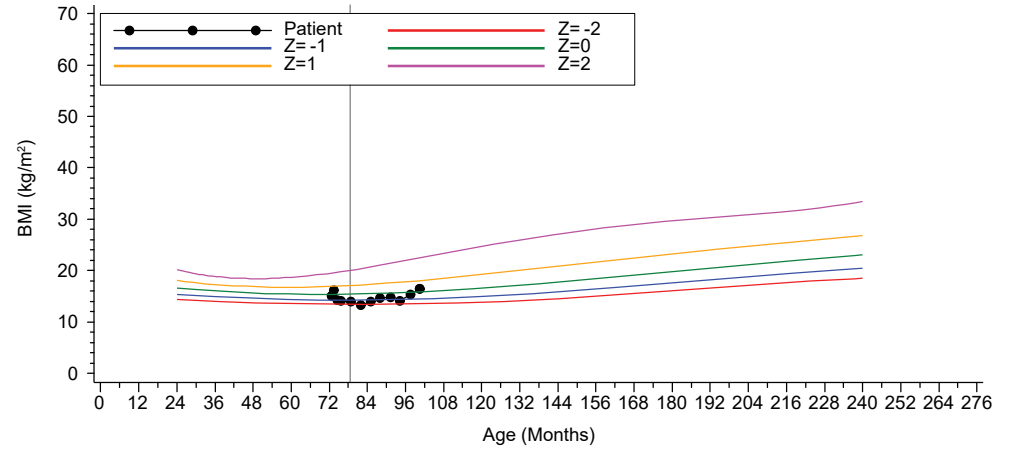

Patient 10  
Seizure History: Partial Onset Seizures

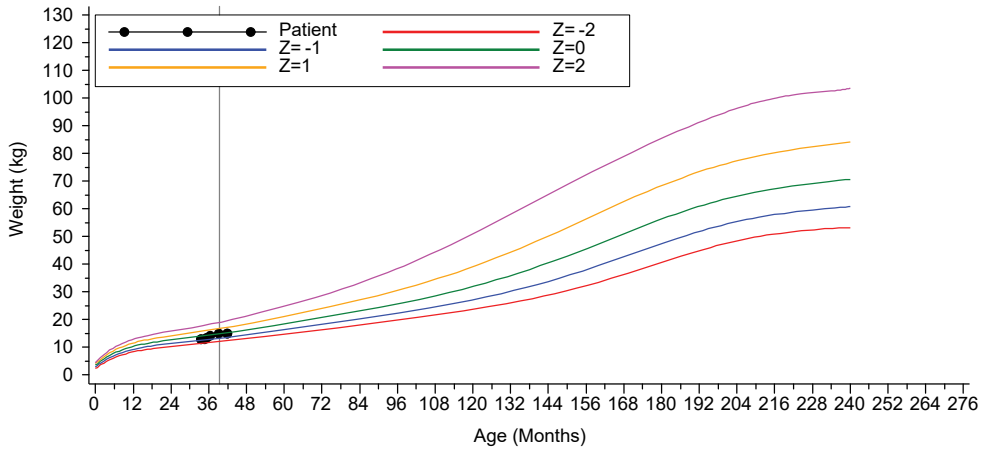

Patient 10  
Seizure History: Partial Onset Seizures

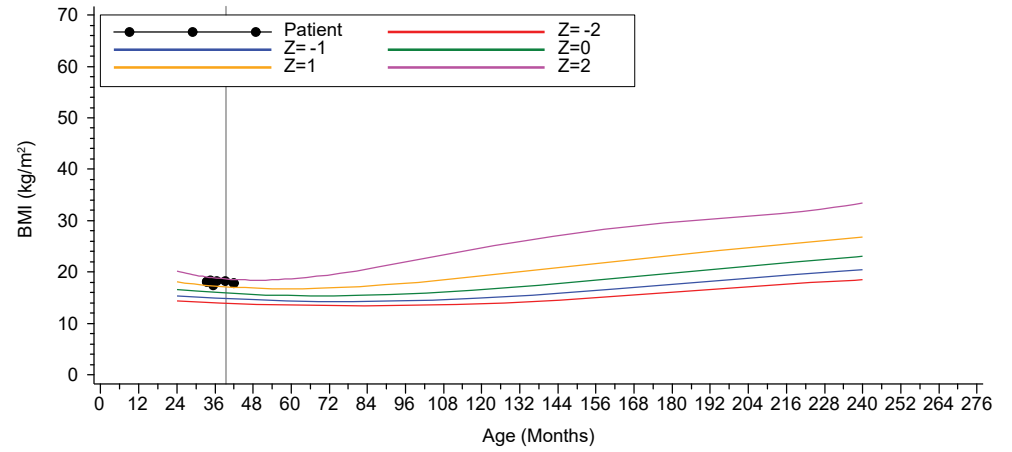

Patient 11  
Seizure History: Partial Onset Seizures

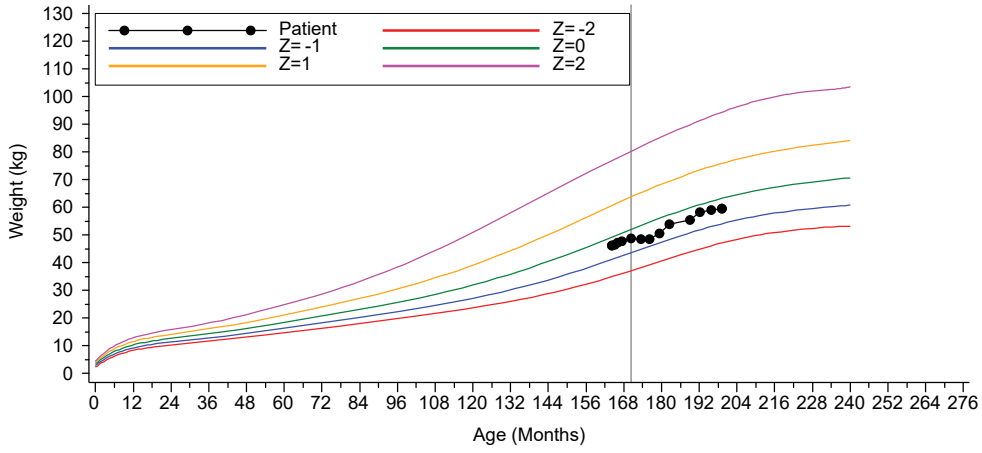

Patient 11  
Seizure History: Partial Onset Seizures

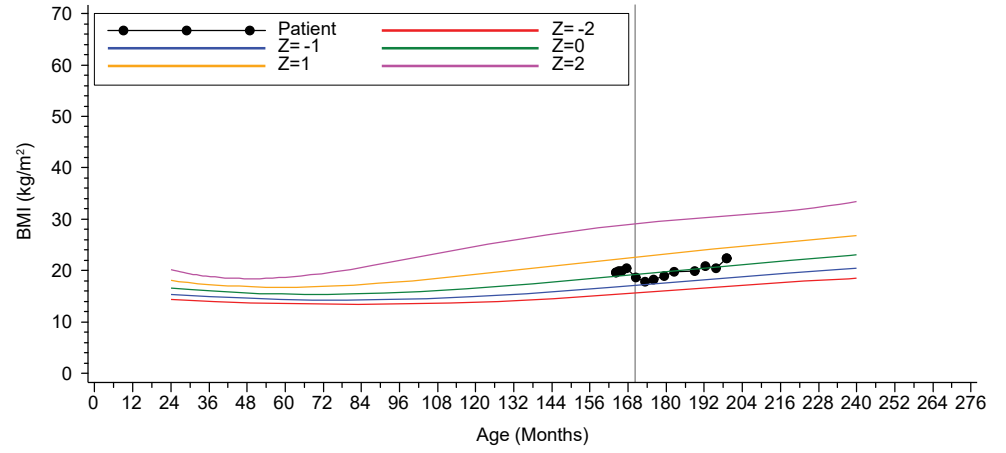

Patient 12  
Seizure History: Partial Onset Seizures

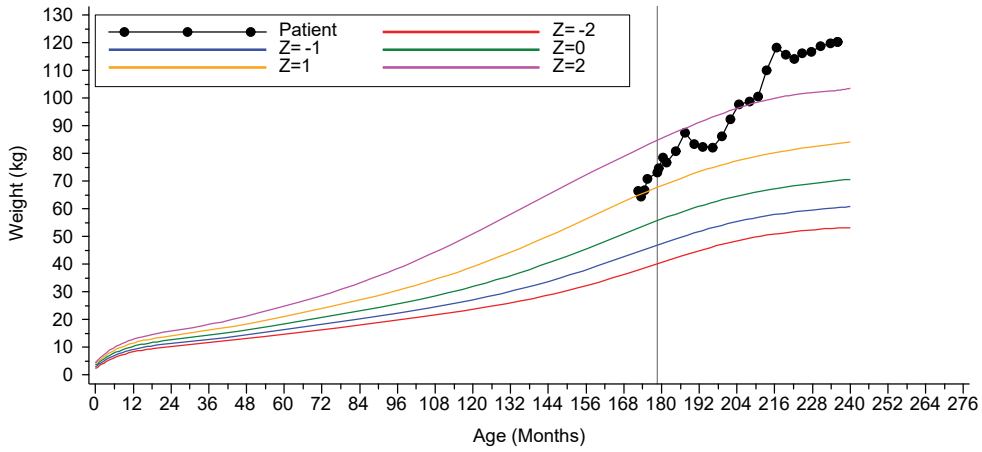

Patient 12  
Seizure History: Partial Onset Seizures

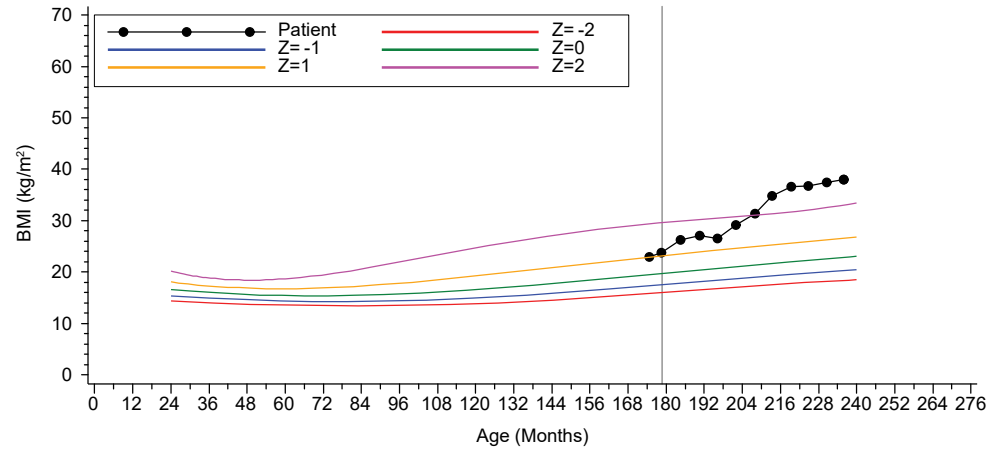

Patient 13  
Seizure History: Partial Onset Seizures

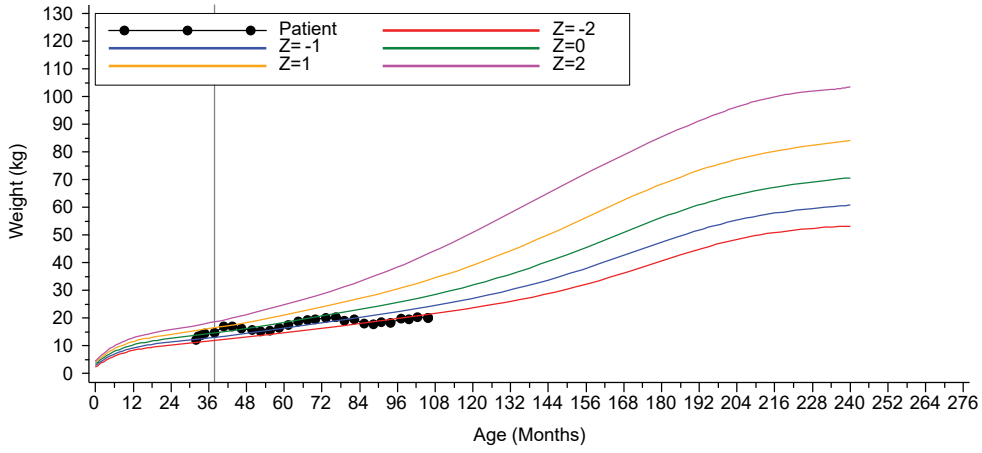

Patient 13  
Seizure History: Partial Onset Seizures

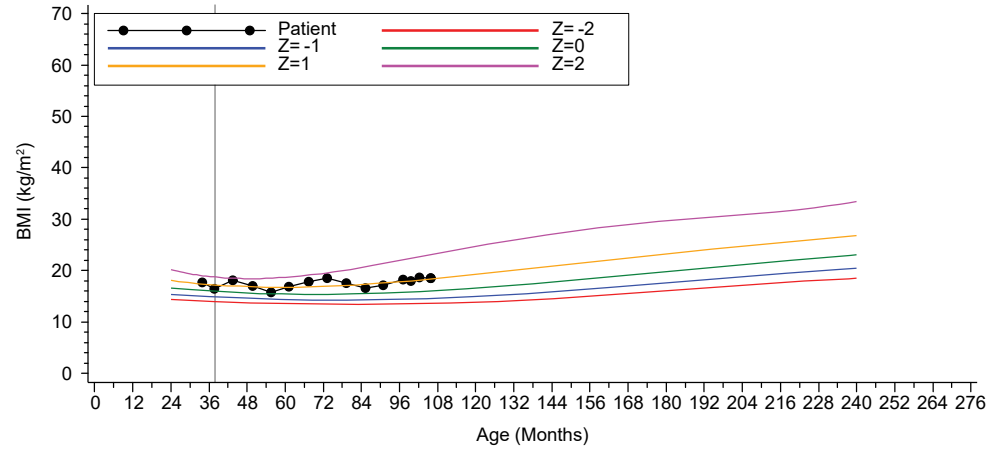

Patient 14  
Seizure History: Partial Onset Seizures

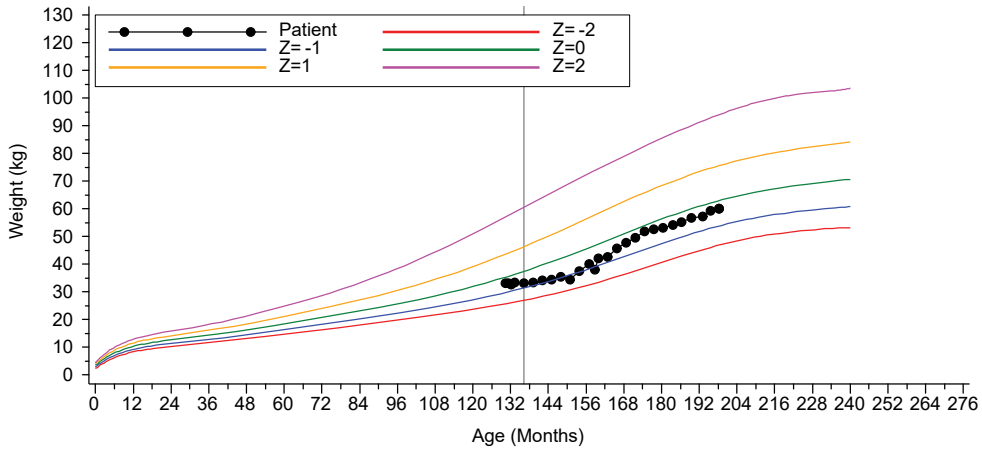

Patient 14  
Seizure History: Partial Onset Seizures

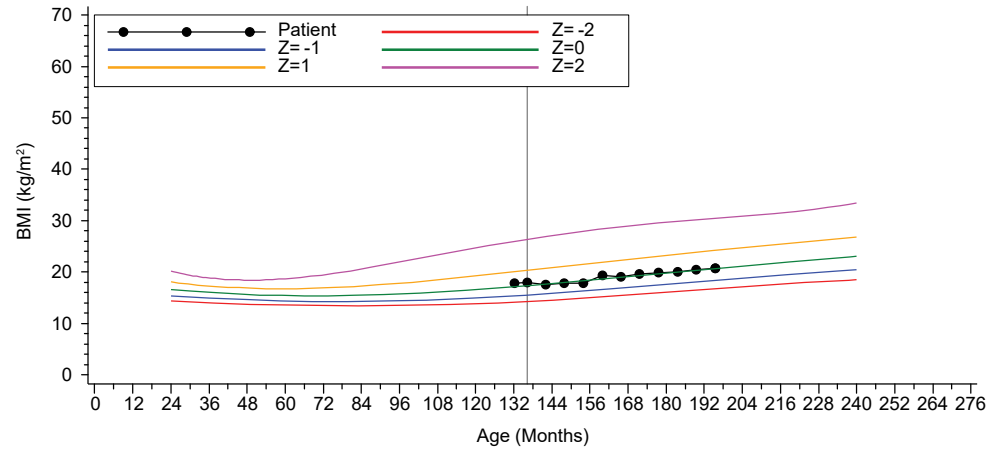



Patient 15  
Seizure History: Partial Onset Seizures

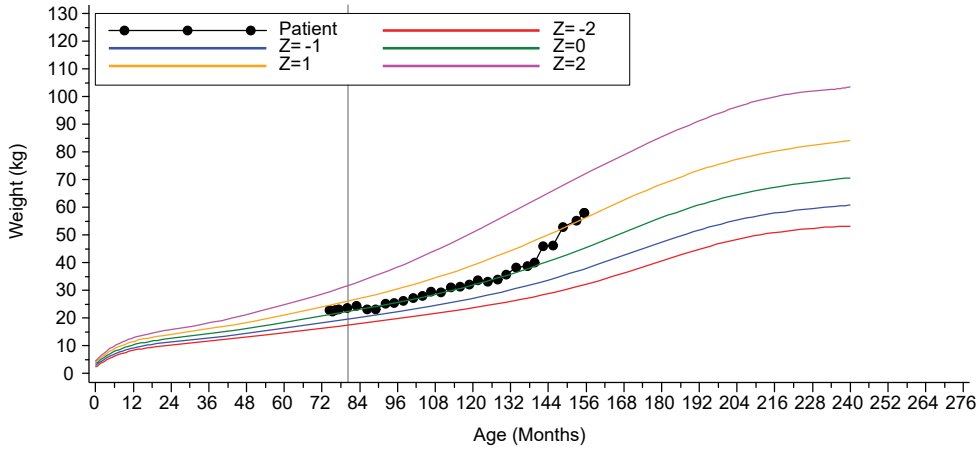

Patient 15  
Seizure History: Partial Onset Seizures

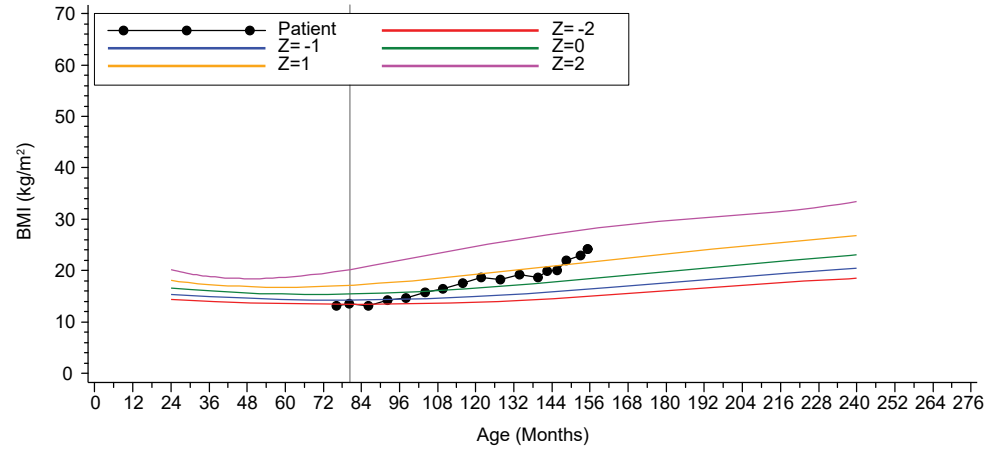

Patient 16  
Seizure History: Partial Onset Seizures

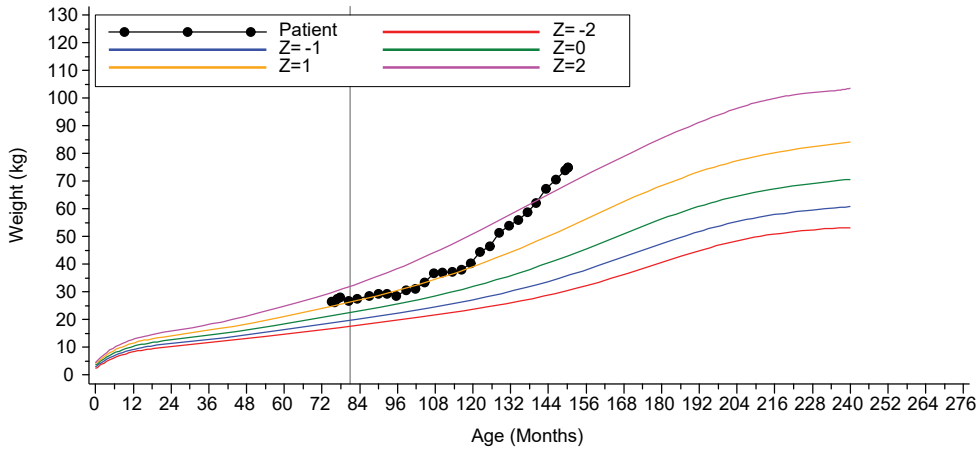

Patient 16  
Seizure History: Partial Onset Seizures

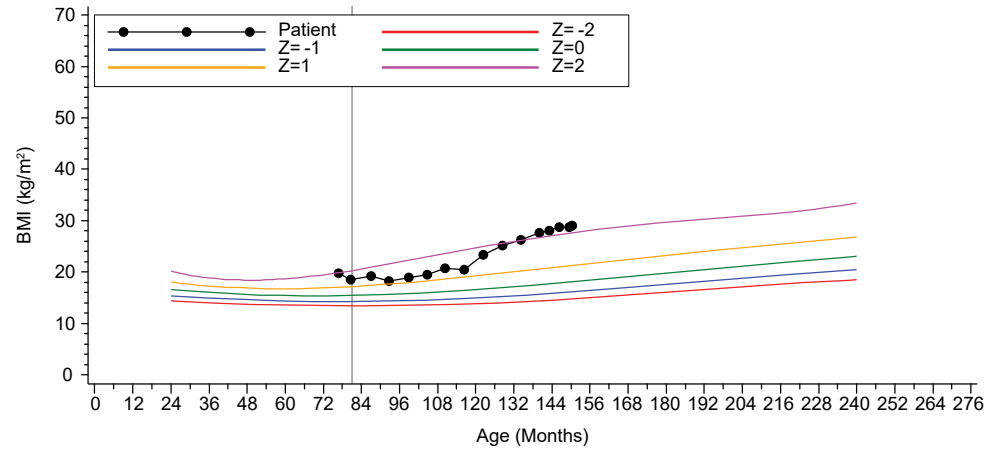

Patient 17  
Seizure History: Partial Onset Seizures

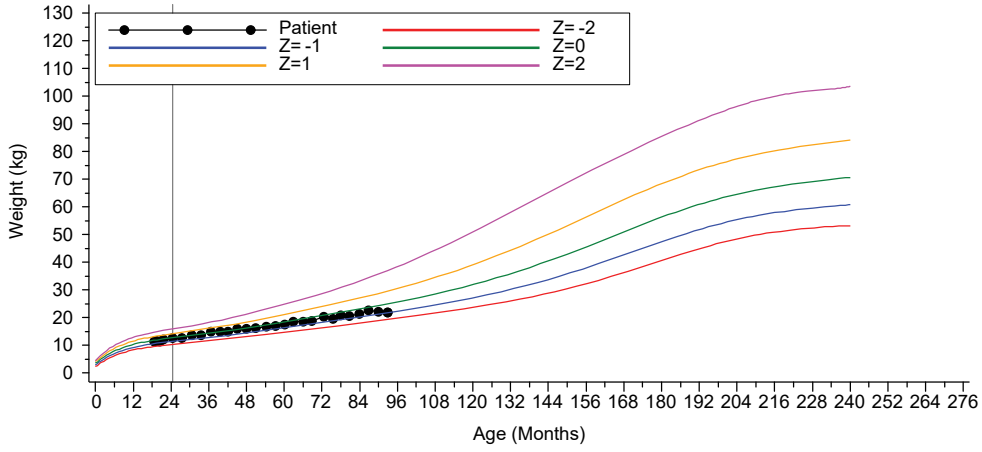

Patient 17  
Seizure History: Partial Onset Seizures

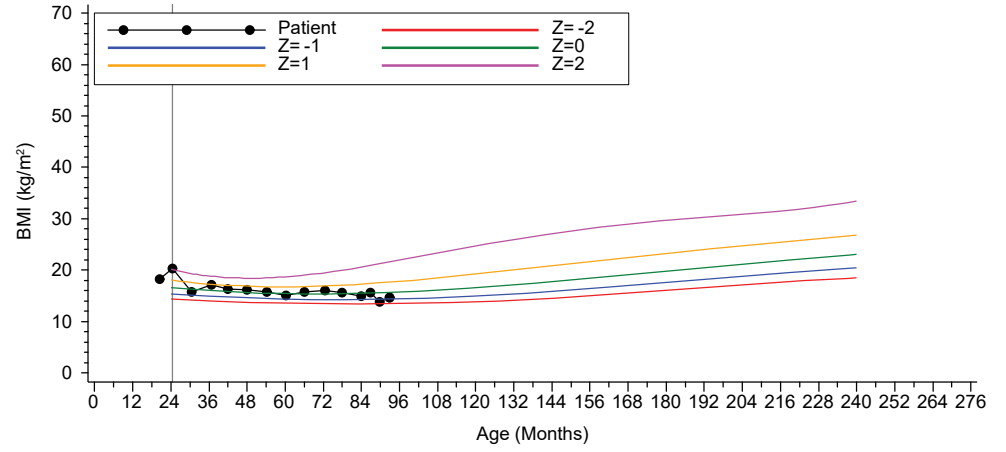

Patient 18  
Seizure History: Partial Onset Seizures

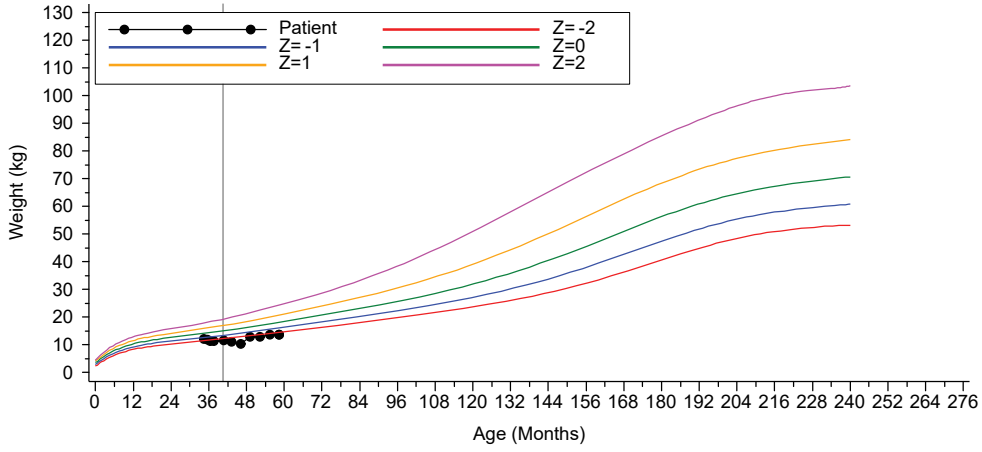

Patient 18  
Seizure History: Partial Onset Seizures

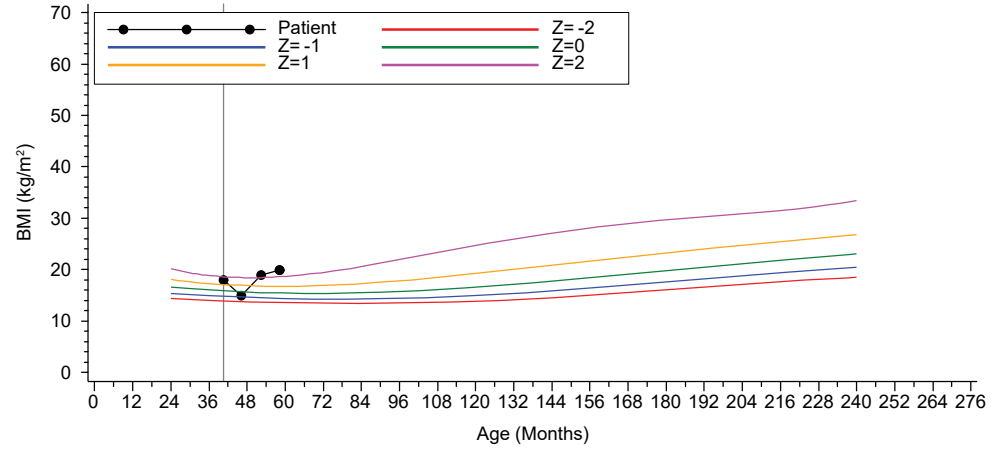

Patient 19  
Seizure History: Partial Onset Seizures

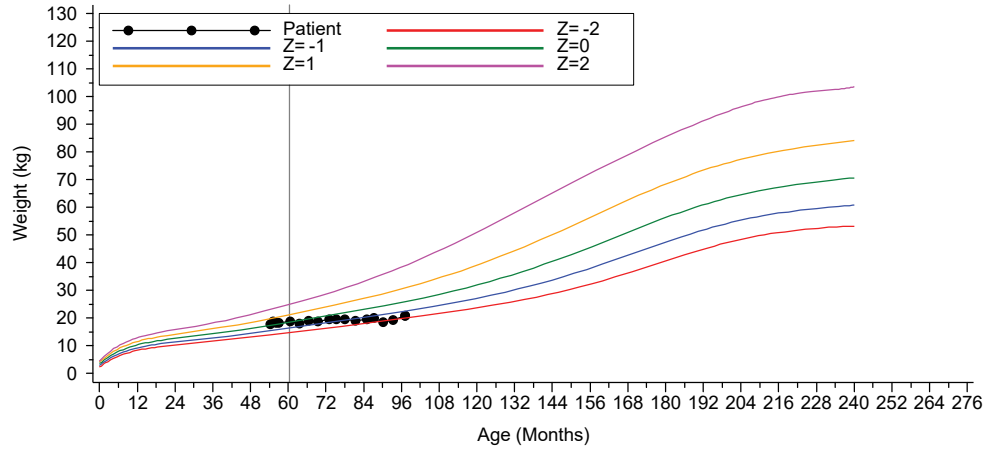

Patient 19  
Seizure History: Partial Onset Seizures

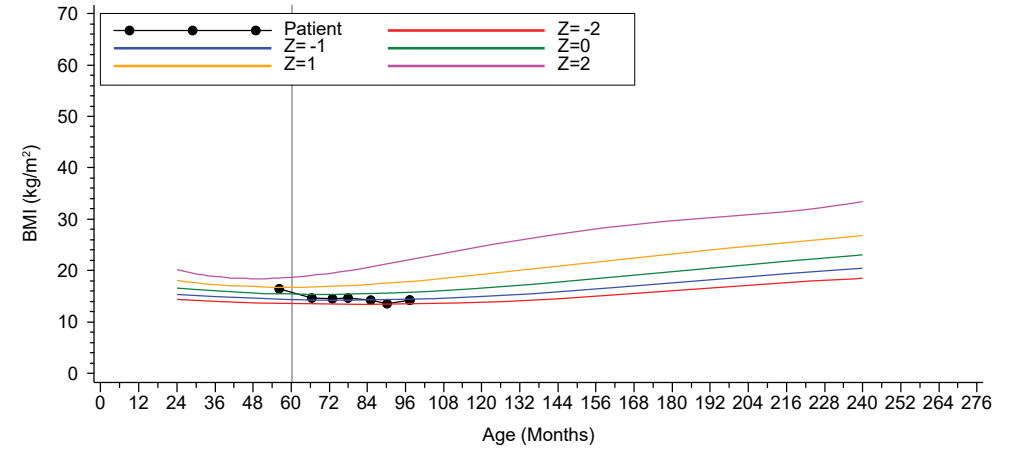

Patient 20  
Seizure History: Partial Onset Seizures

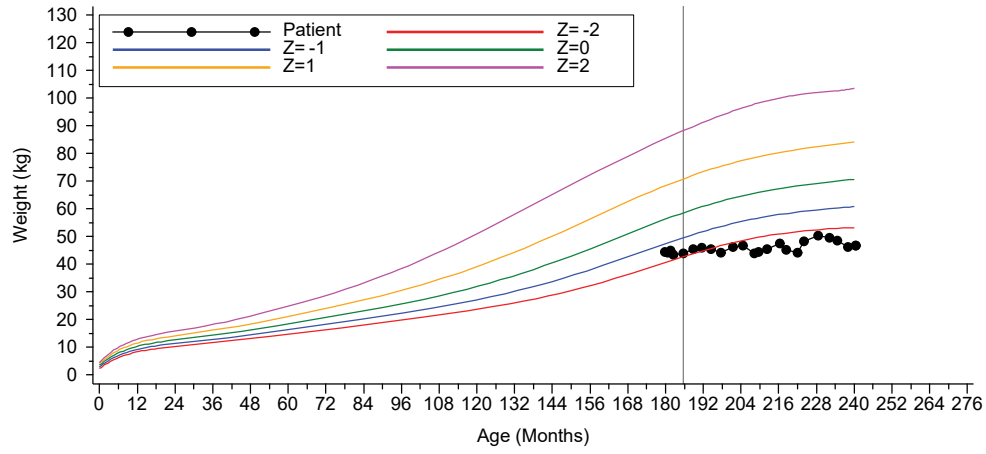

Patient 20  
Seizure History: Partial Onset Seizures

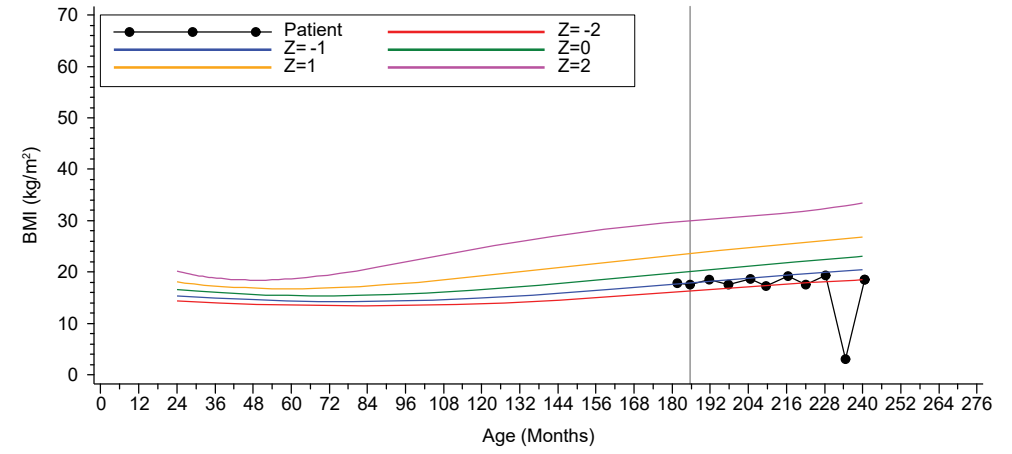

Patient 21  
Seizure History: Partial Onset Seizures

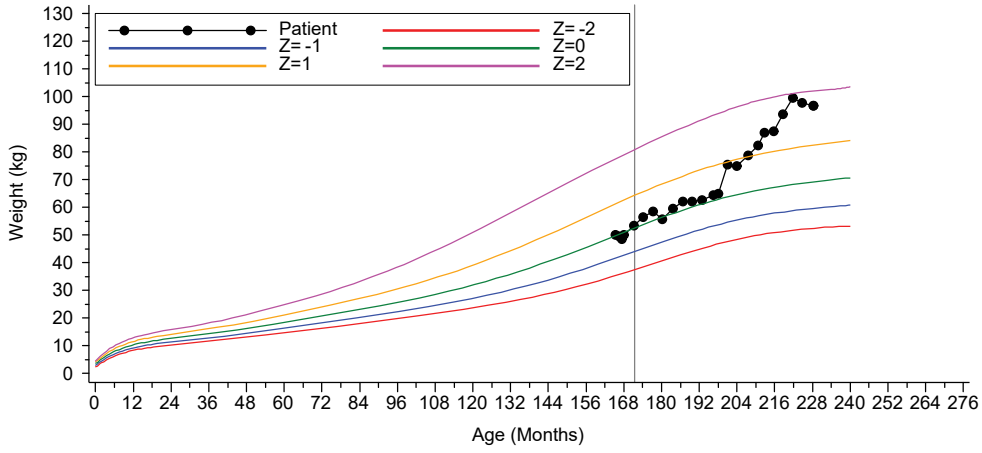

Patient 21  
Seizure History: Partial Onset Seizures

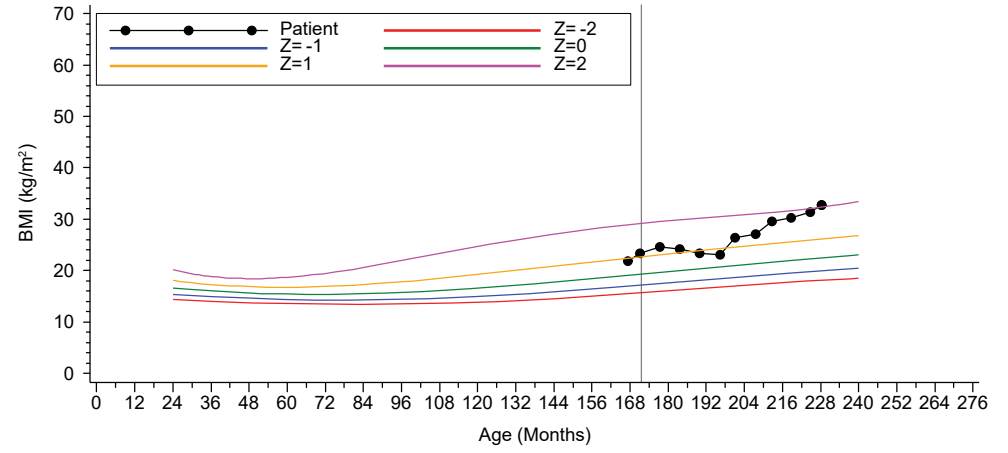

Patient 22  
Seizure History: Partial Onset Seizures

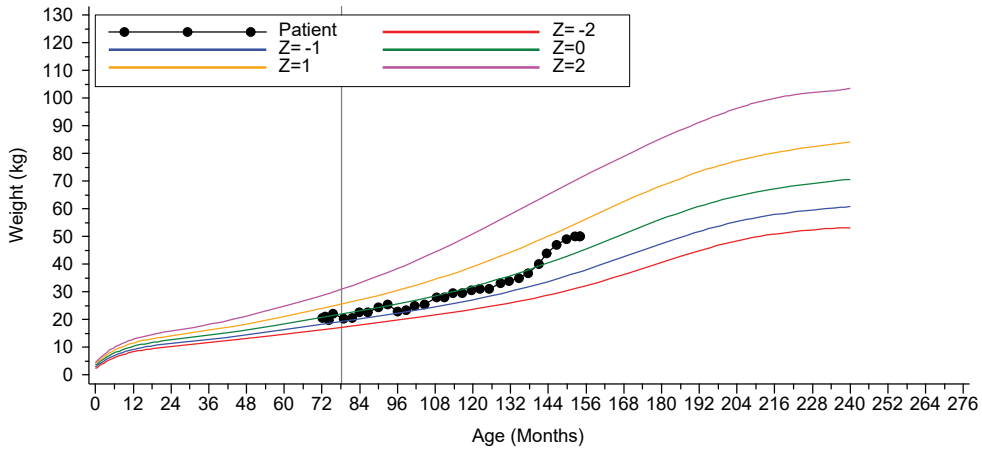

Patient 22  
Seizure History: Partial Onset Seizures

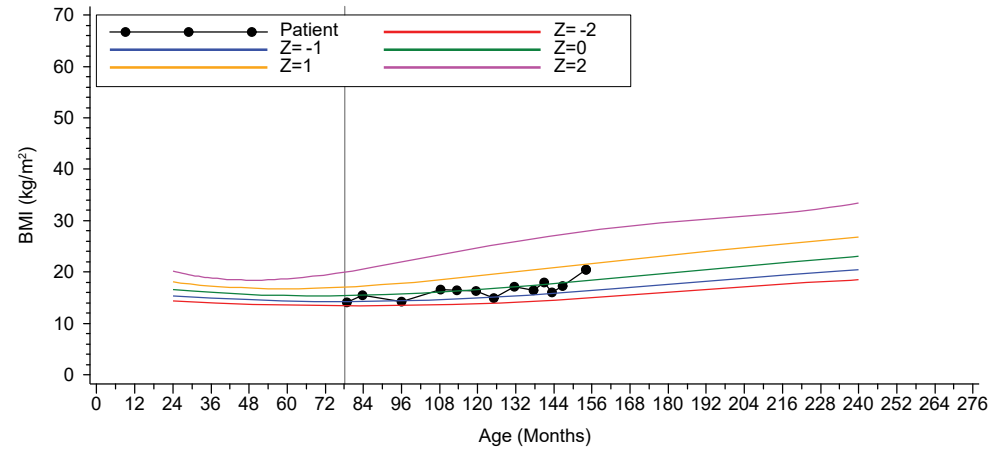

Patient 23  
Seizure History: Partial Onset Seizures

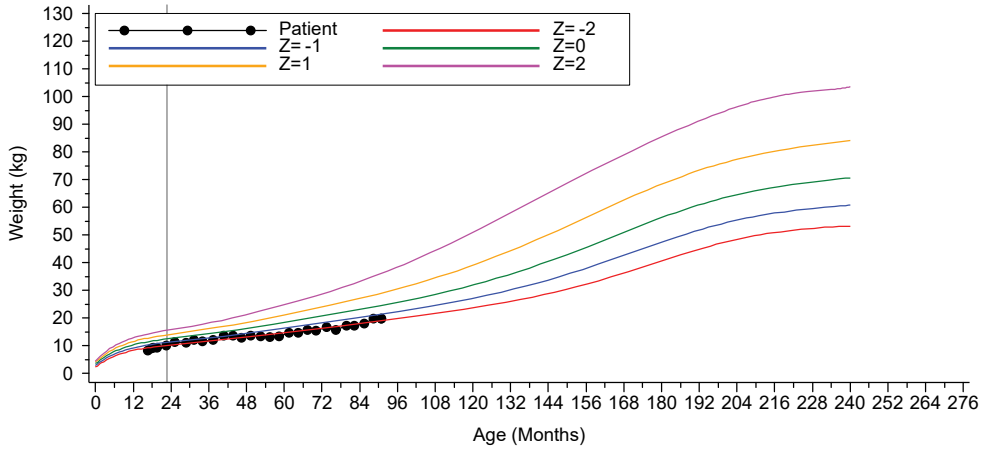

Patient 23  
Seizure History: Partial Onset Seizures

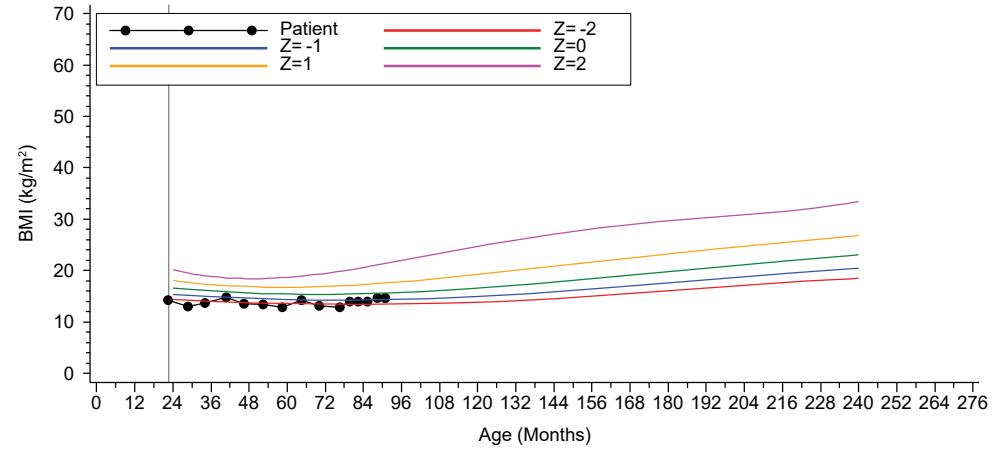

Patient 24  
Seizure History: Partial Onset Seizures

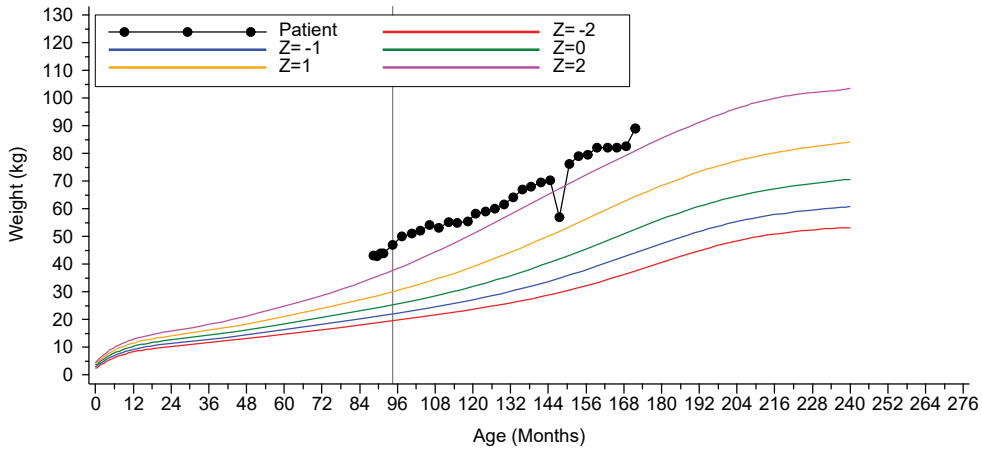

Patient 24  
Seizure History: Partial Onset Seizures

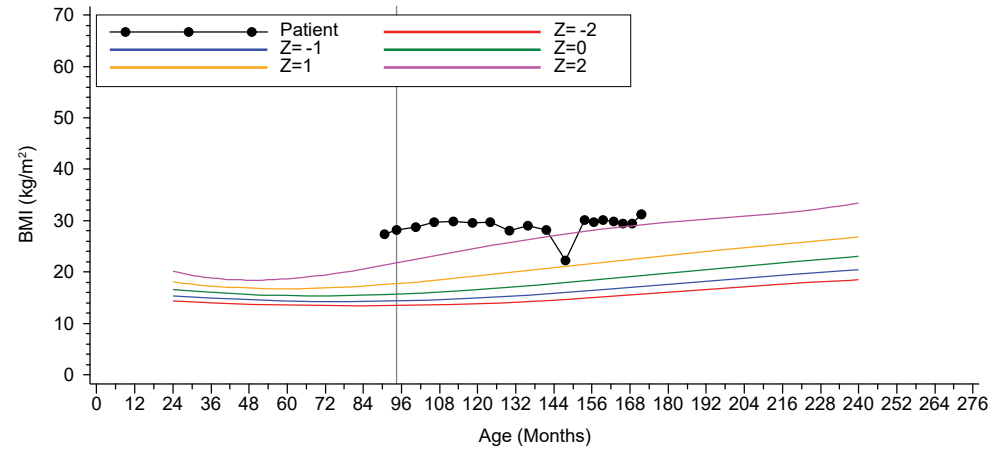

Patient 25  
Seizure History: Partial Onset Seizures

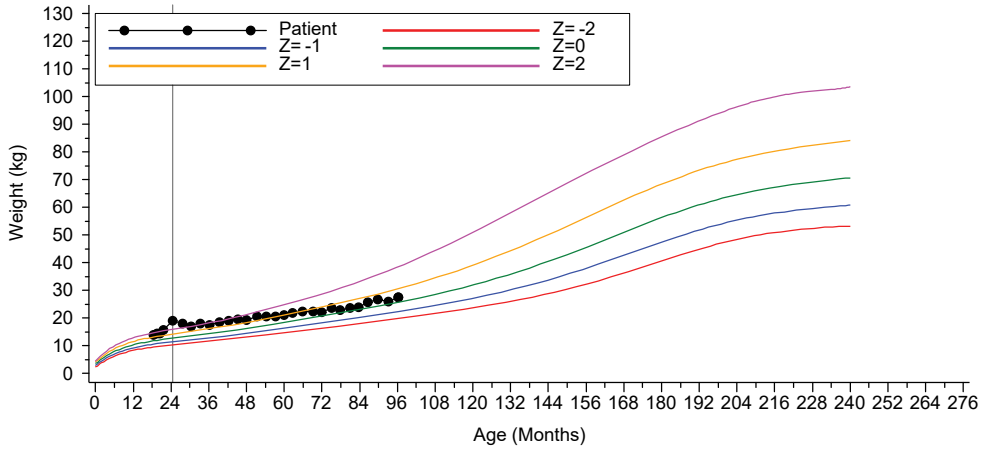

Patient 25  
Seizure History: Partial Onset Seizures

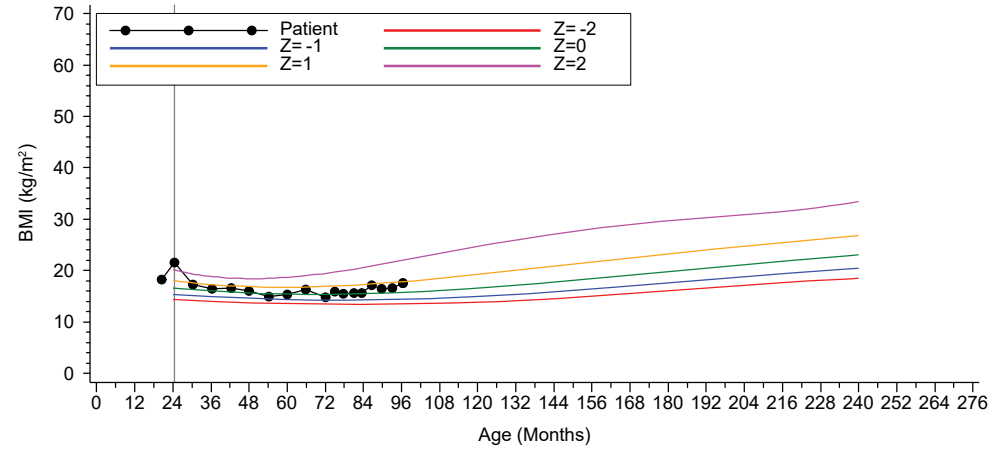

Patient 26  
Seizure History: Partial Onset Seizures

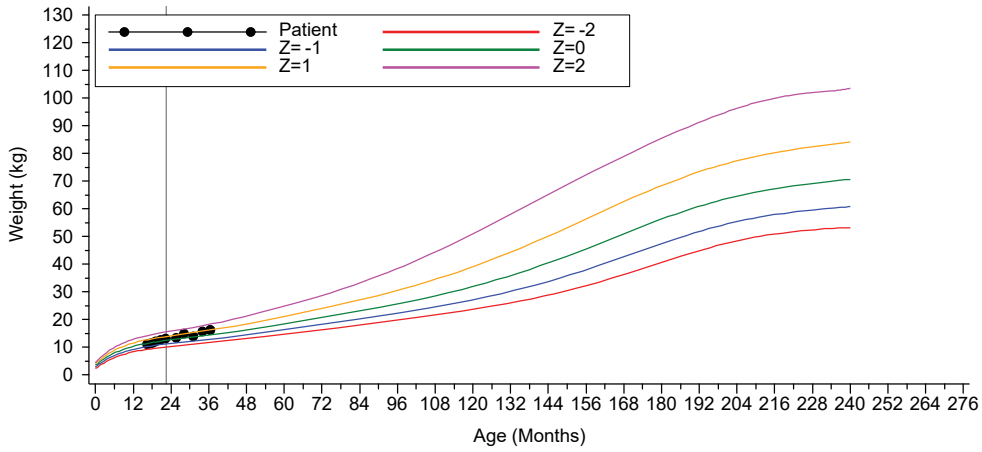

Patient 26  
Seizure History: Partial Onset Seizures

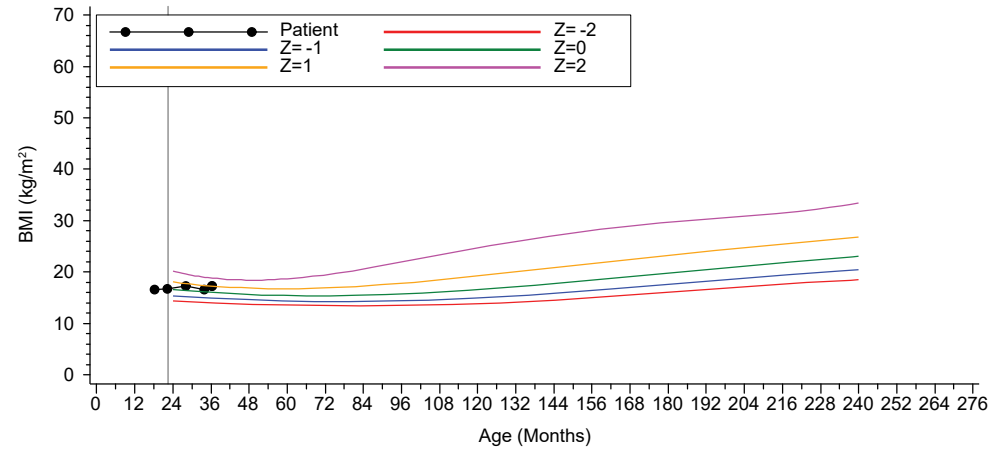

Patient 27  
Seizure History: Partial Onset Seizures

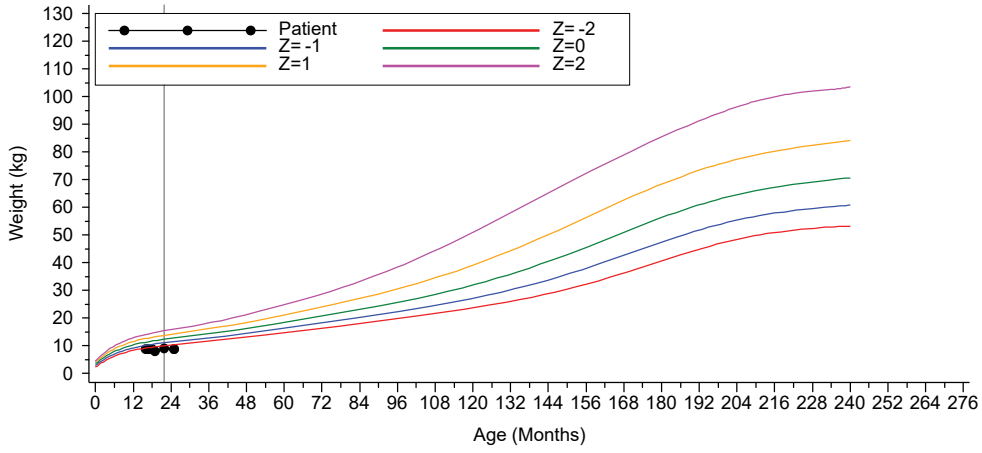

Patient 27  
Seizure History: Partial Onset Seizures

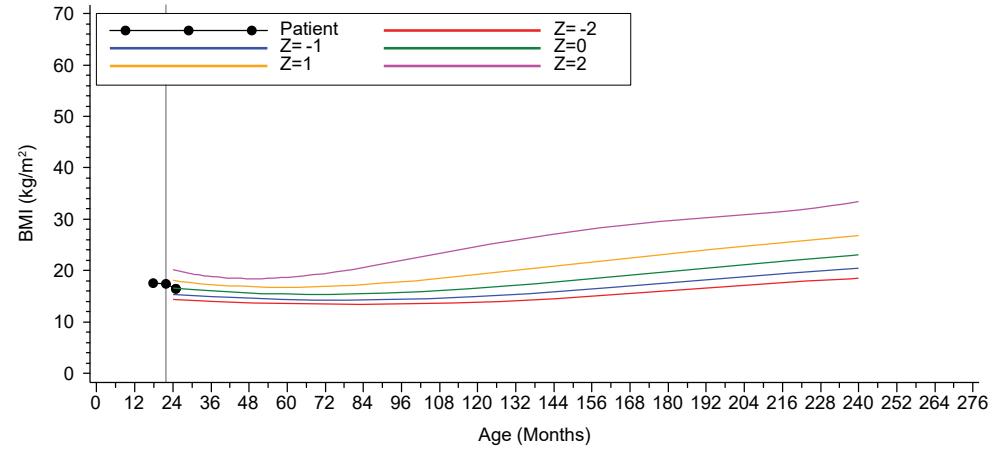

Patient 28  
Seizure History: Partial Onset Seizures

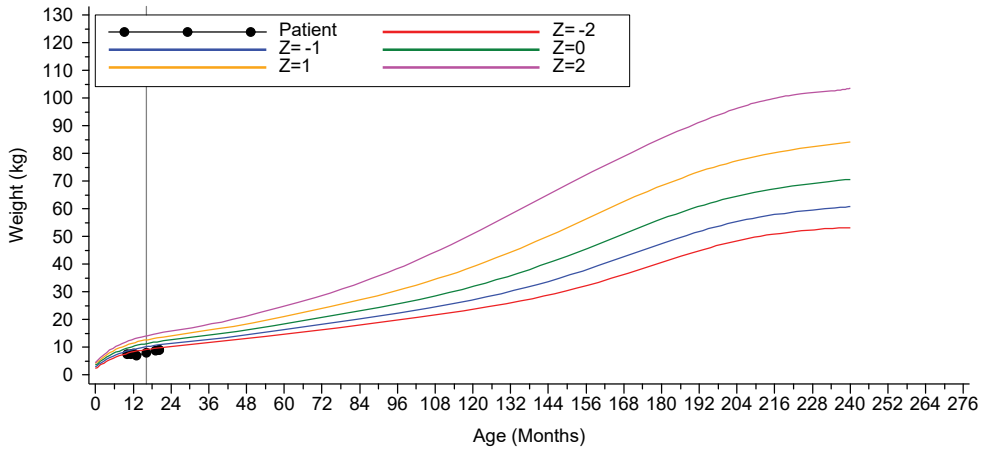

Patient 28  
Seizure History: Partial Onset Seizures

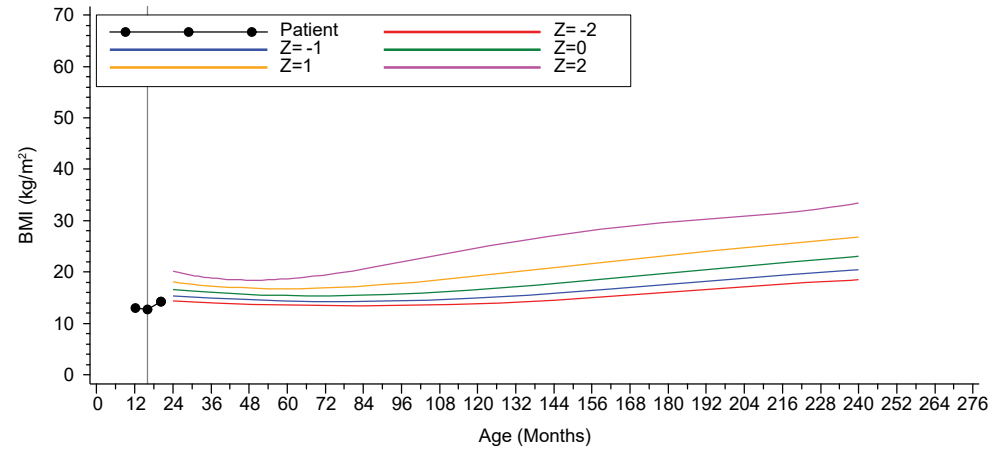

Patient 29  
Seizure History: Partial Onset Seizures

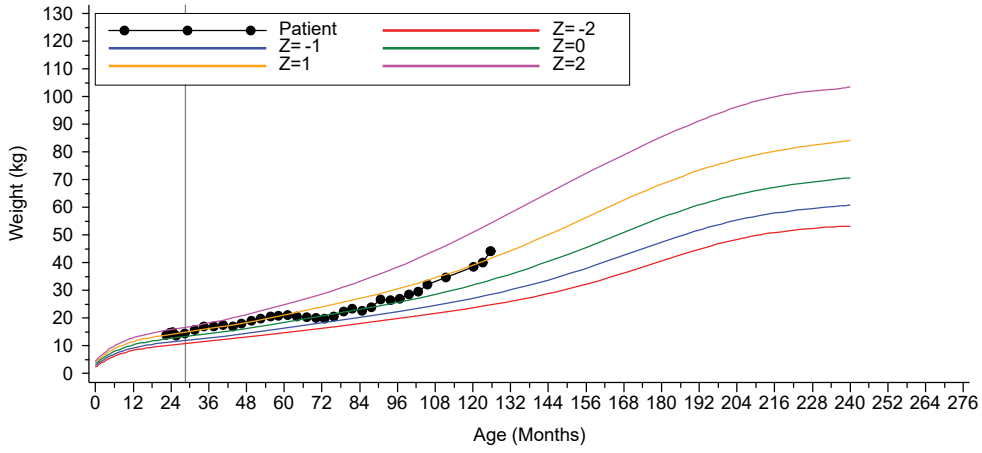

Patient 29  
Seizure History: Partial Onset Seizures

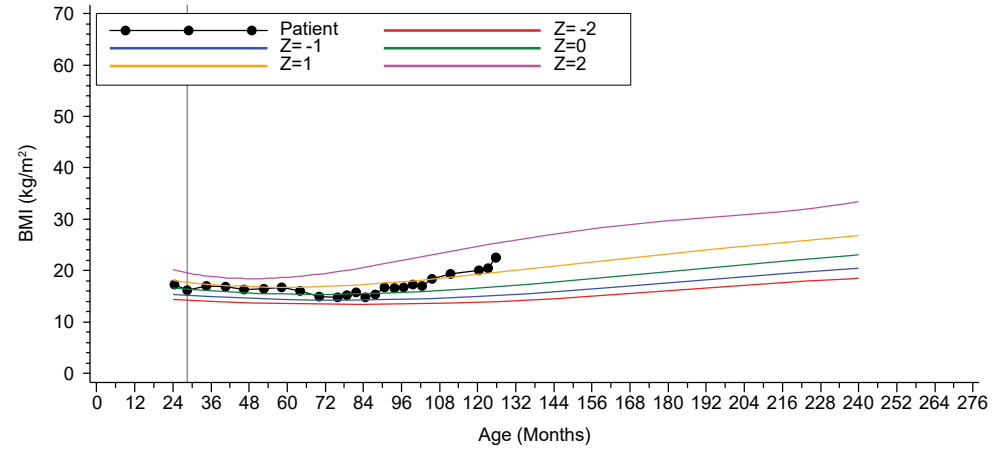

Patient 30  
Seizure History: Partial Onset Seizures

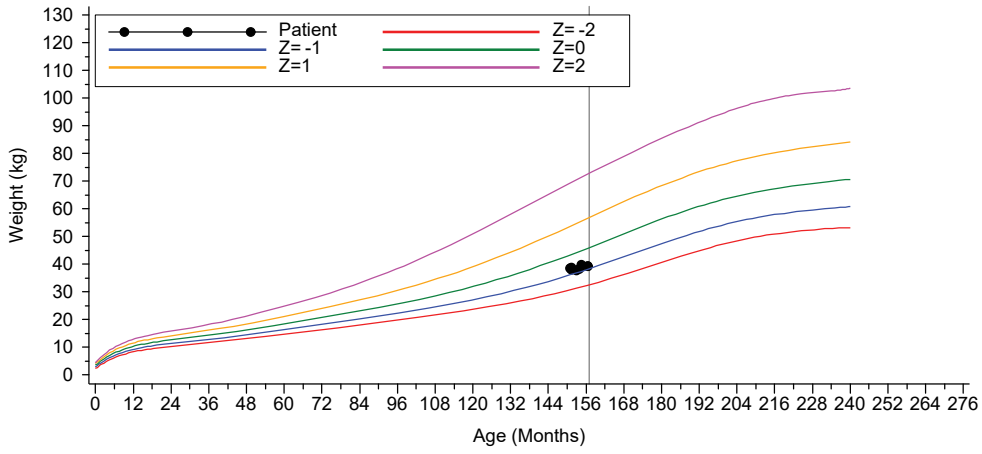

Patient 30  
Seizure History: Partial Onset Seizures

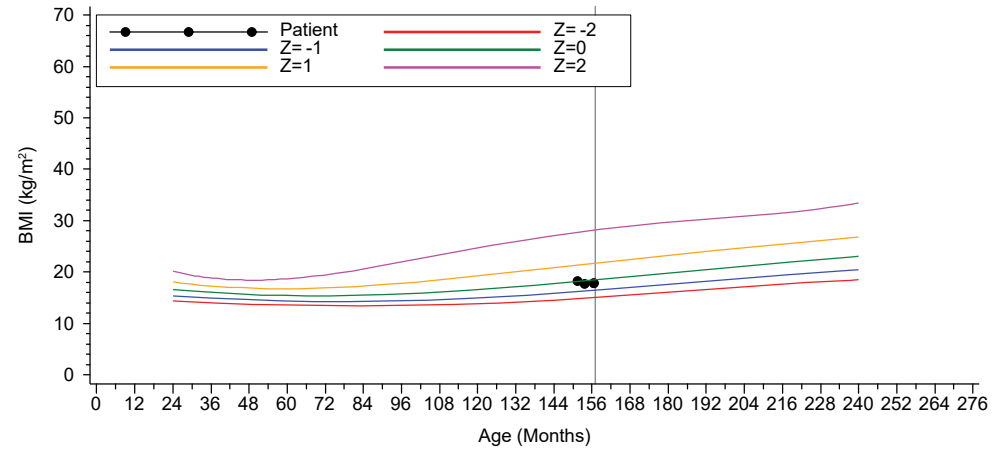



Patient 31  
Seizure History: Partial Onset Seizures

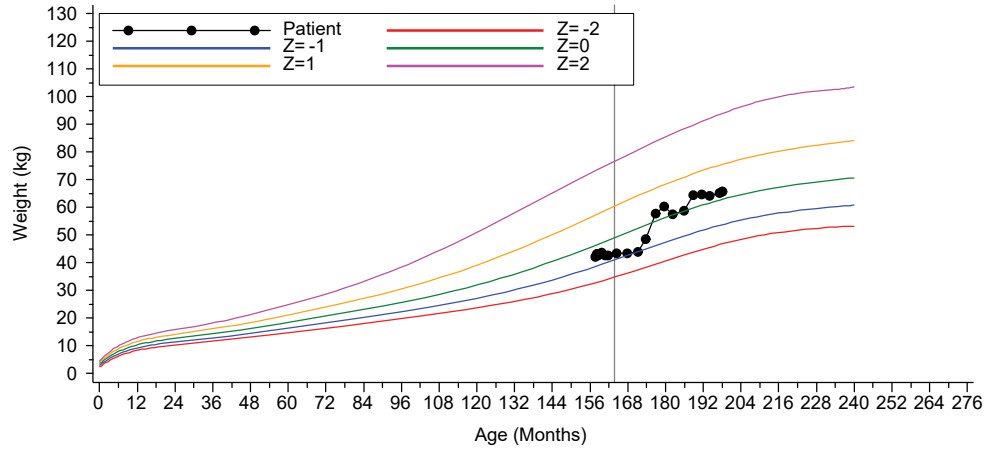

Patient 31  
Seizure History: Partial Onset Seizures

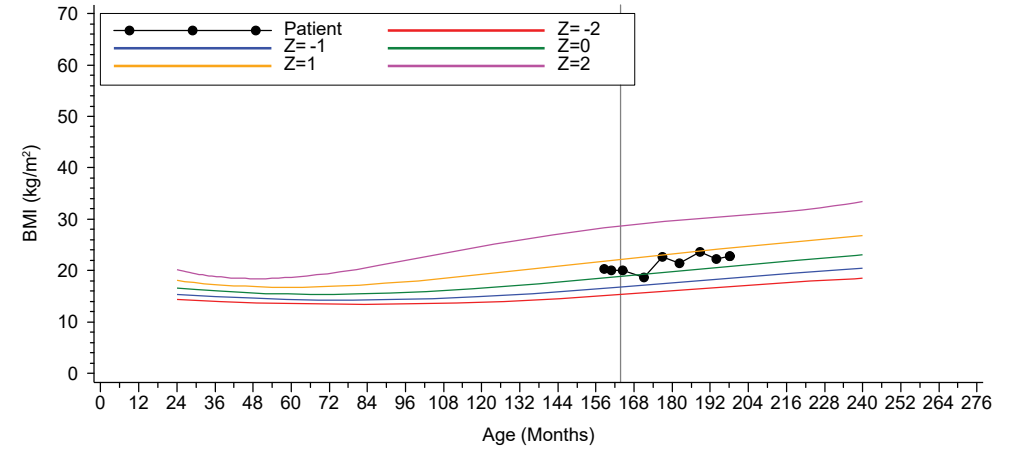

Patient 32  
Seizure History: Partial Onset Seizures

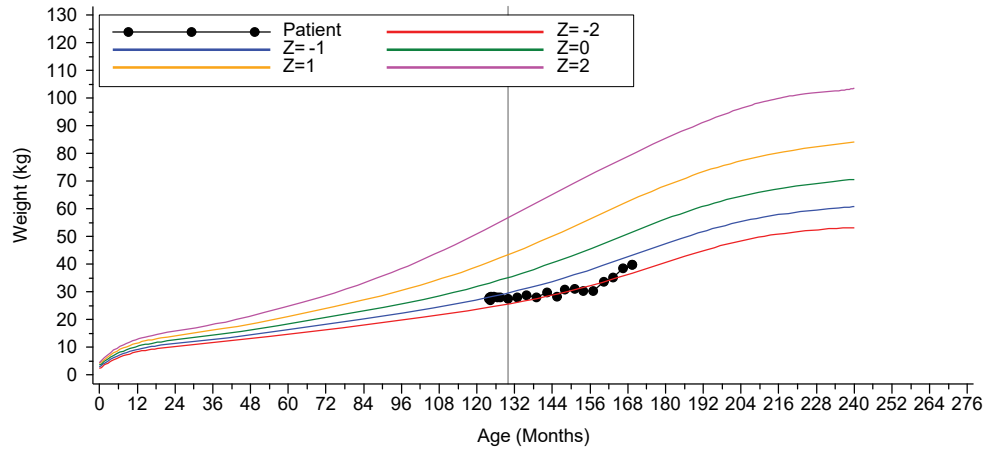

Patient 32  
Seizure History: Partial Onset Seizures

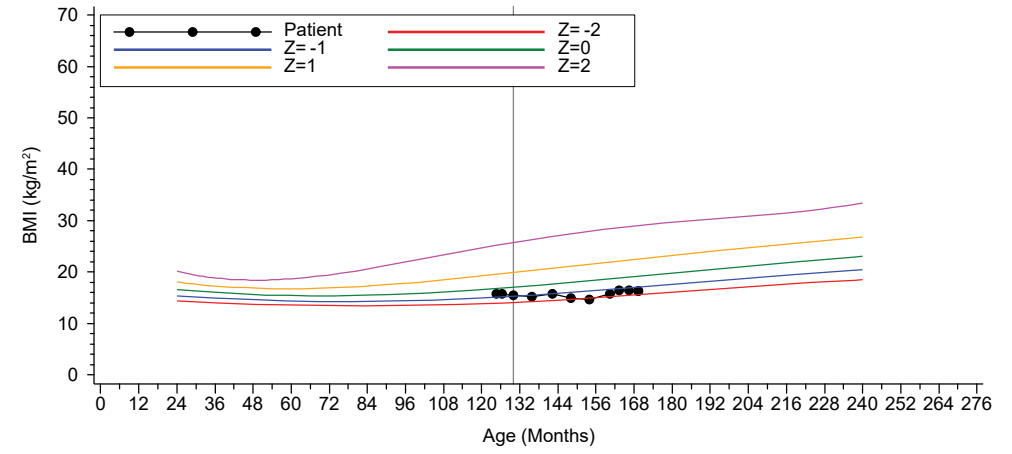

Patient 33  
Seizure History: Partial Onset Seizures

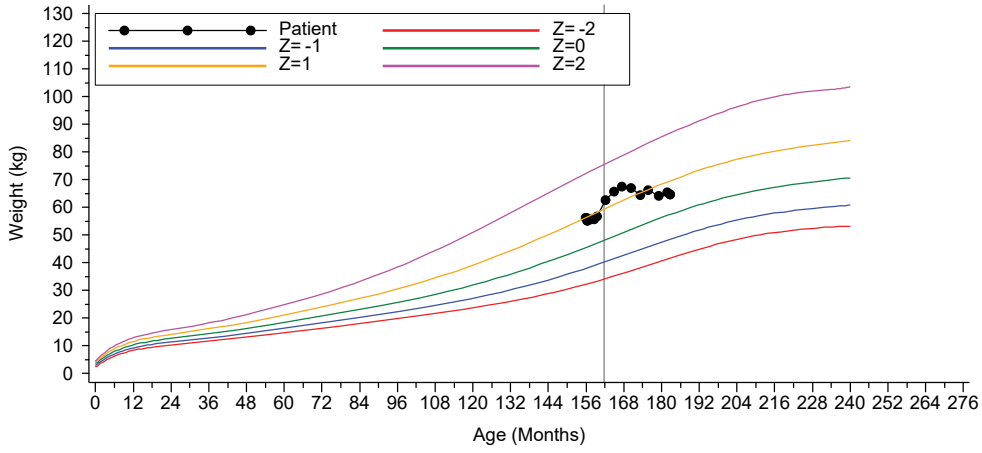

Patient 33  
Seizure History: Partial Onset Seizures

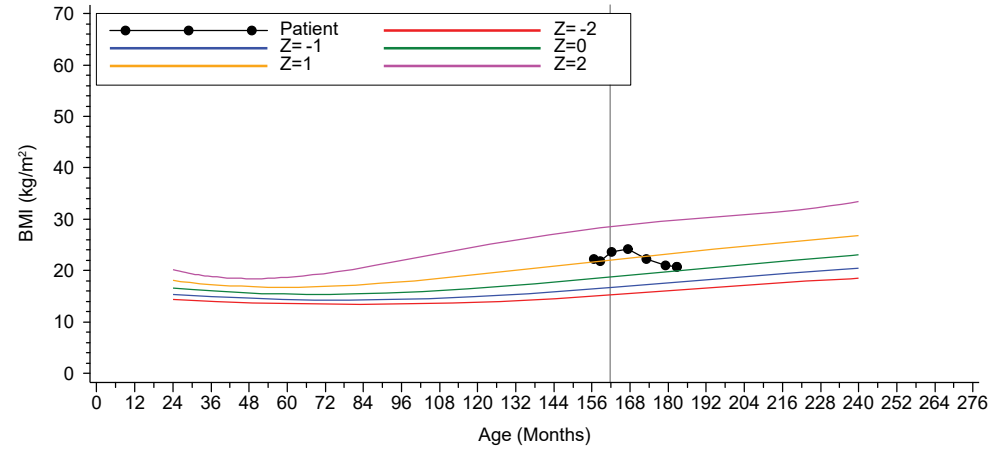

Patient 34  
Seizure History: Partial Onset Seizures

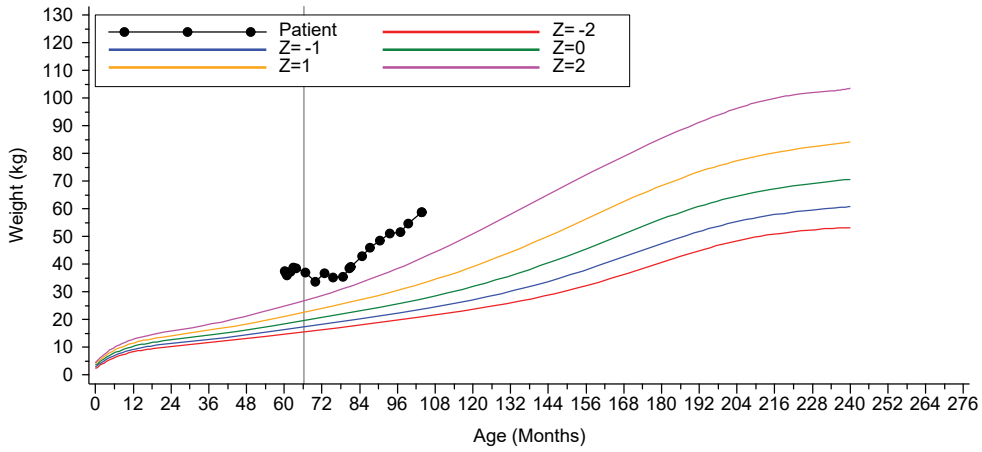

Patient 34  
Seizure History: Partial Onset Seizures

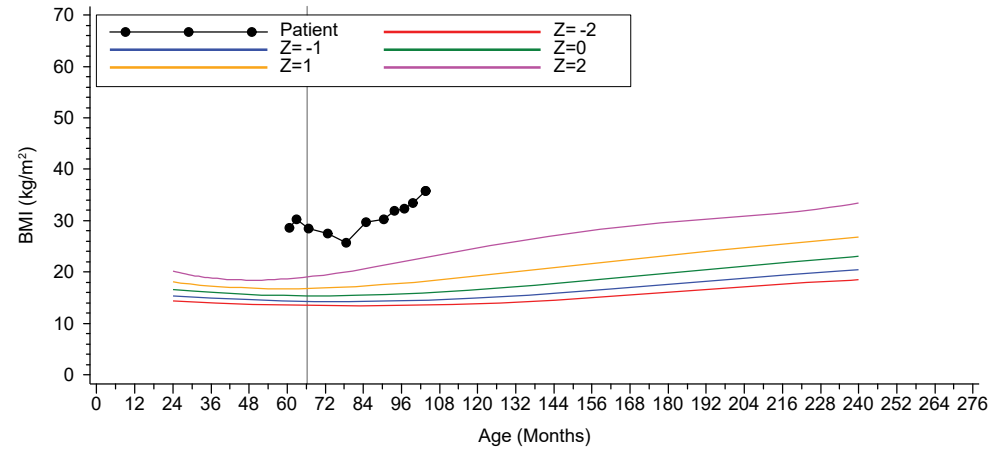

Patient 35  
Seizure History: Partial Onset Seizures

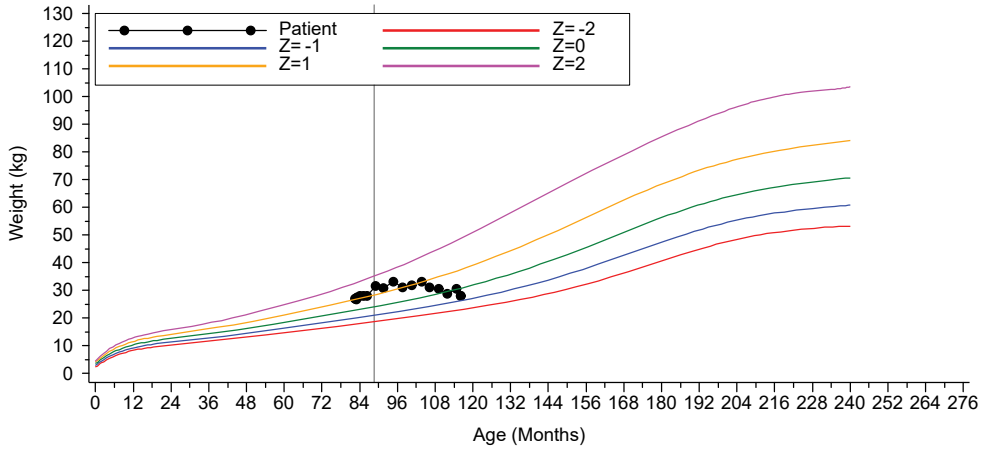

Patient 35  
Seizure History: Partial Onset Seizures

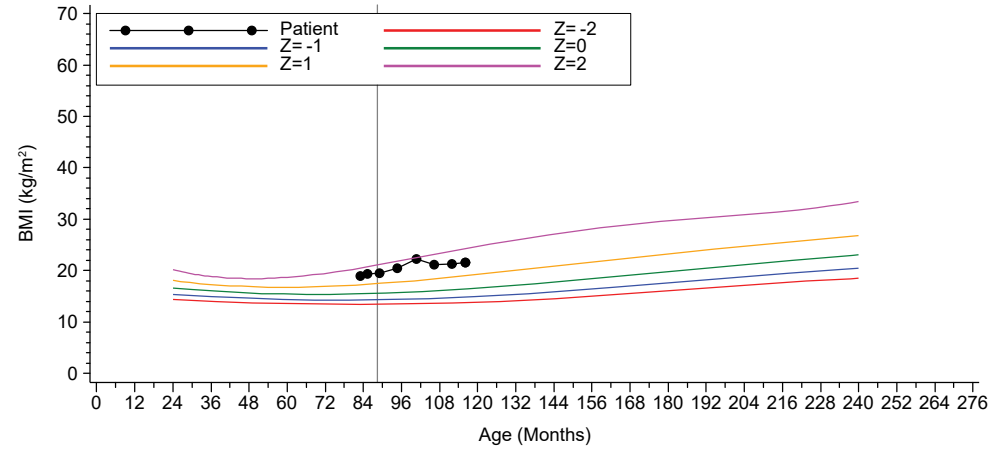

Patient 36  
Seizure History: Partial Onset Seizures

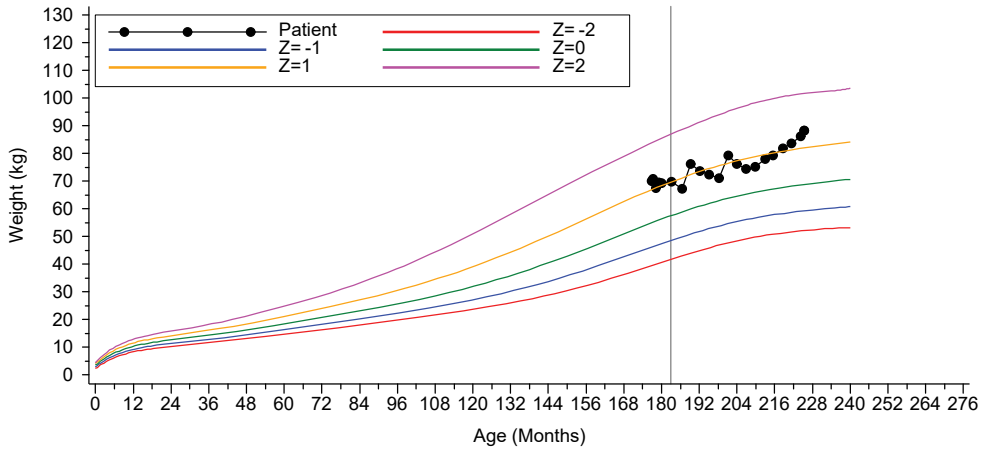

Patient 36  
Seizure History: Partial Onset Seizures

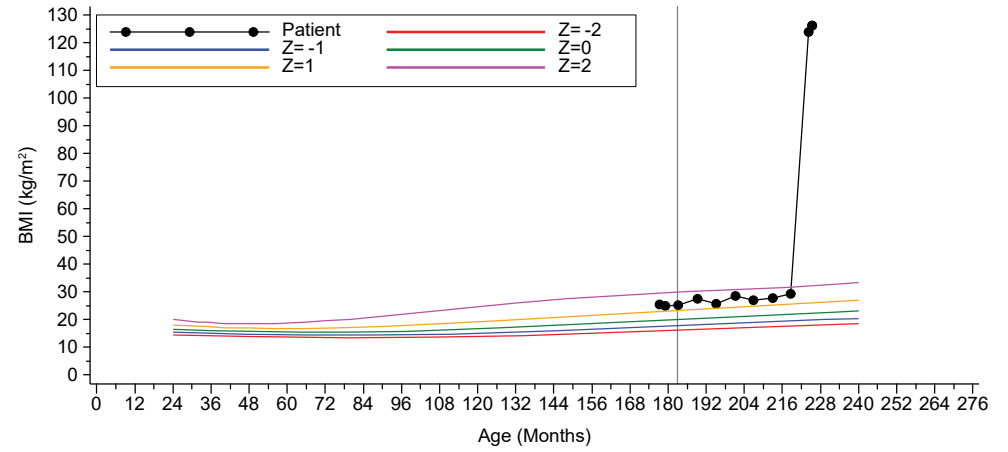

Patient 37  
Seizure History: Partial Onset Seizures

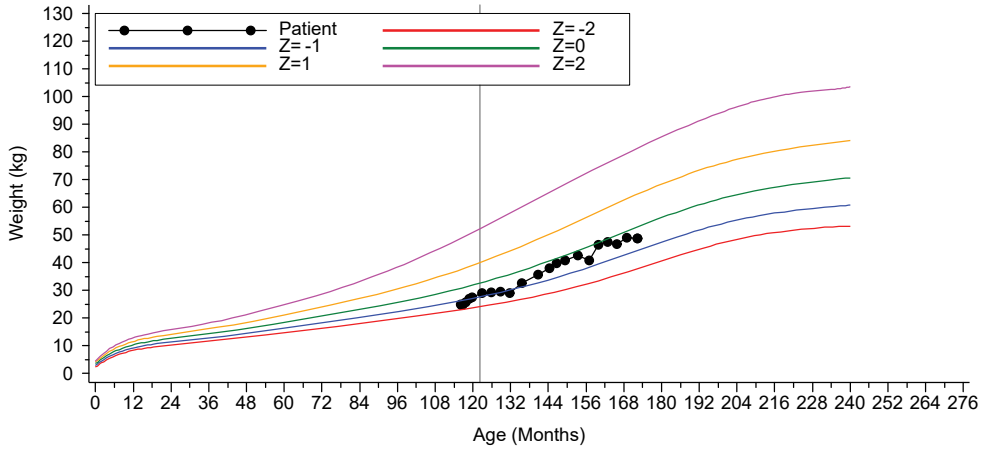

Patient 37  
Seizure History: Partial Onset Seizures

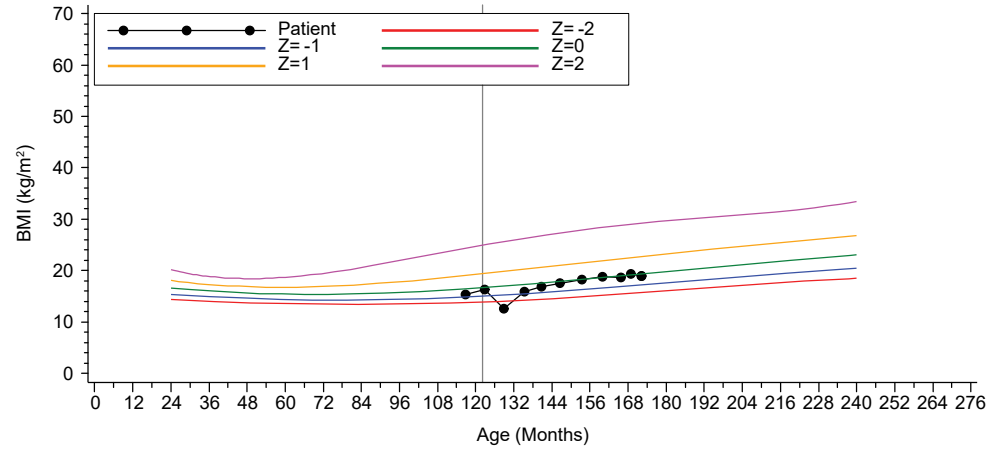

Patient 38  
Seizure History: Partial Onset Seizures

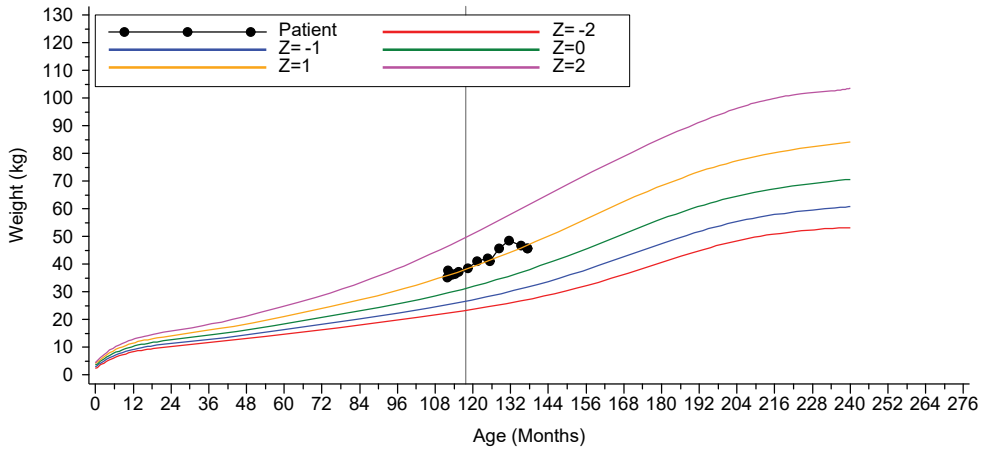

Patient 38  
Seizure History: Partial Onset Seizures

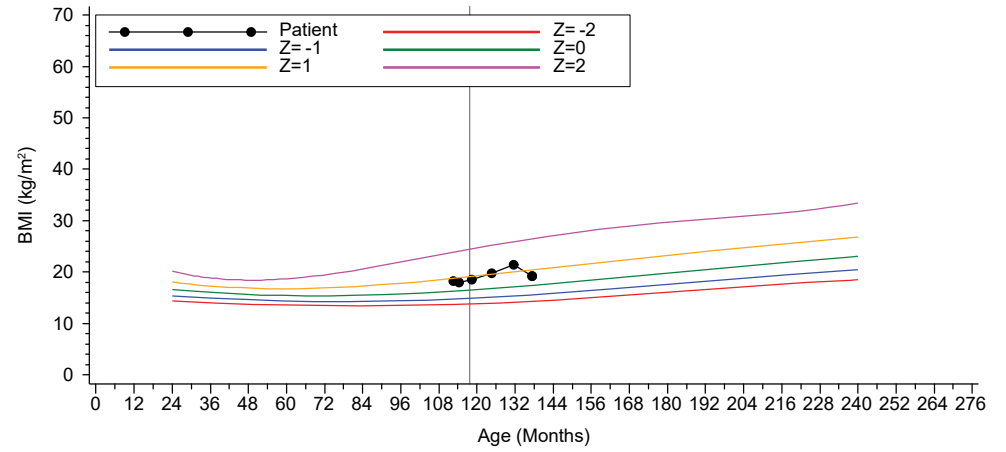

Patient 39  
Seizure History: Partial Onset Seizures

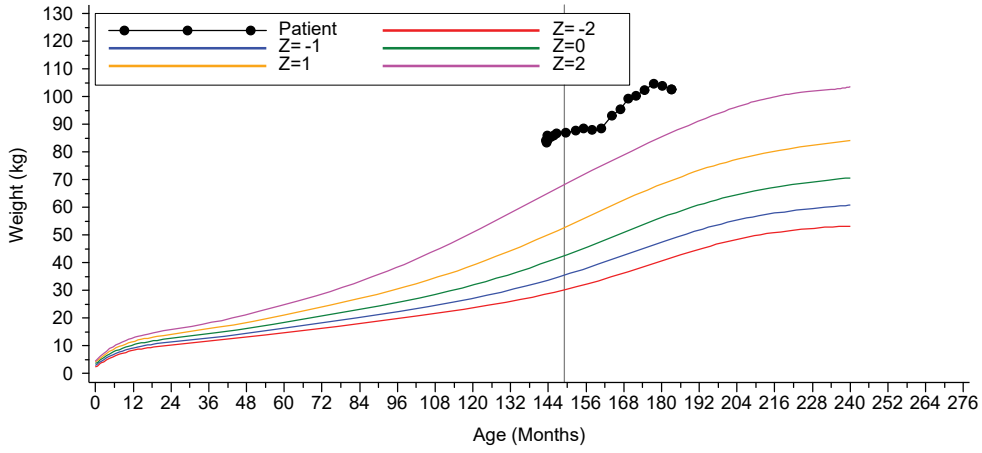

Patient 39  
Seizure History: Partial Onset Seizures

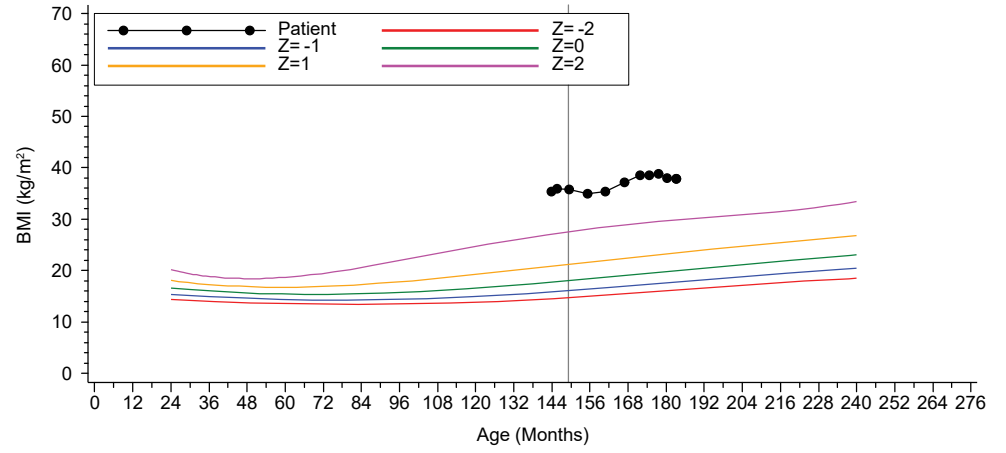

Patient 40  
Seizure History: Partial Onset Seizures

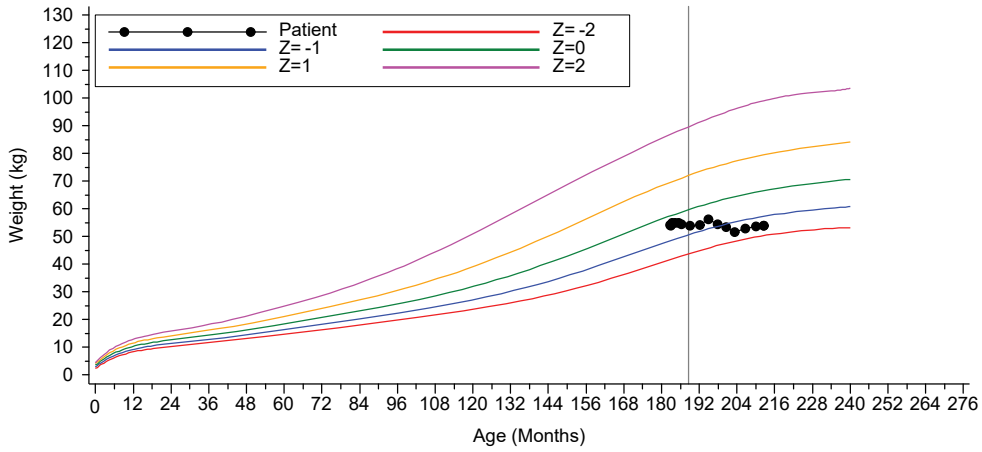

Patient 40  
Seizure History: Partial Onset Seizures

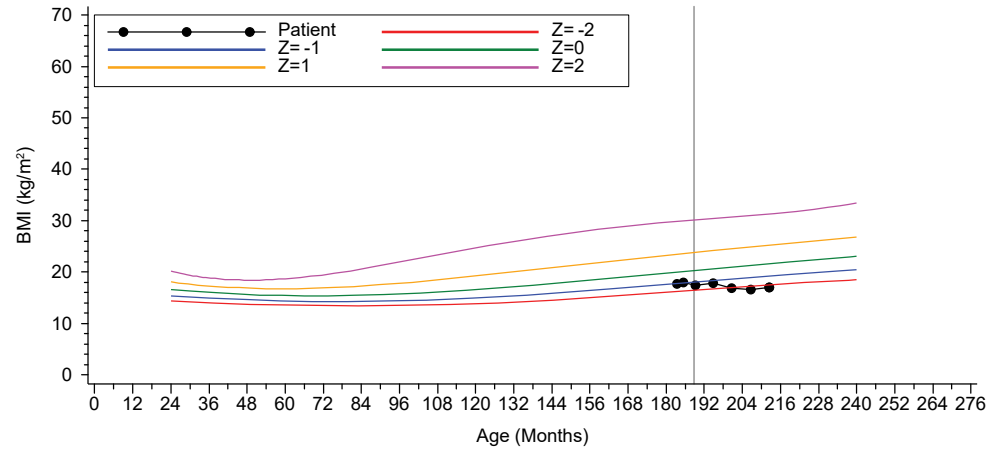

Patient 41  
Seizure History: Partial Onset Seizures

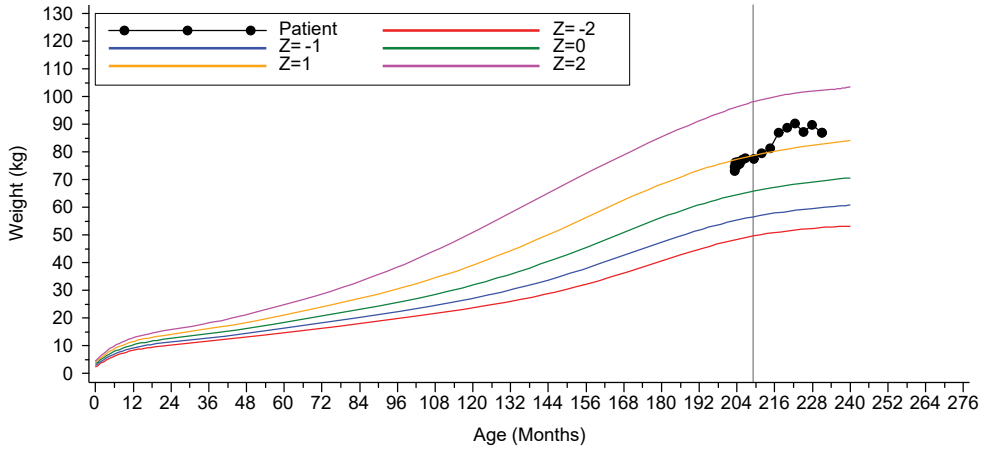

Patient 41  
Seizure History: Partial Onset Seizures

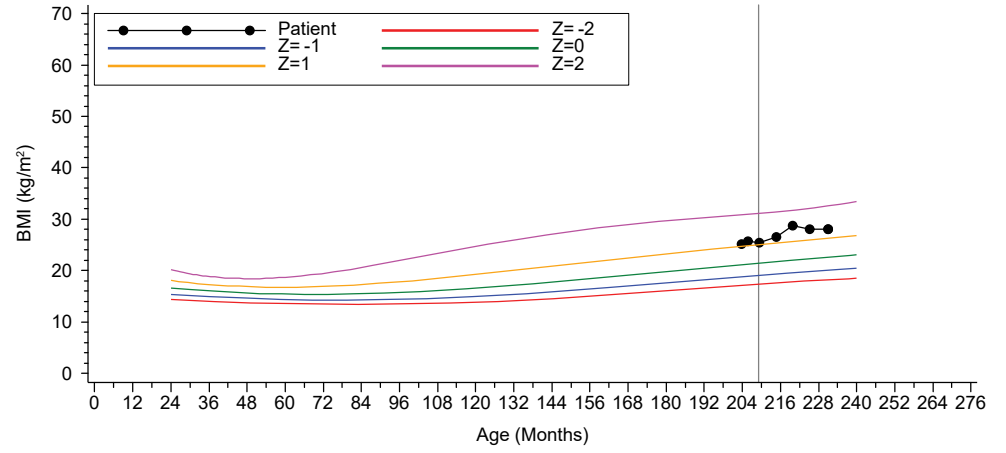

Patient 42  
Seizure History: Partial Onset Seizures

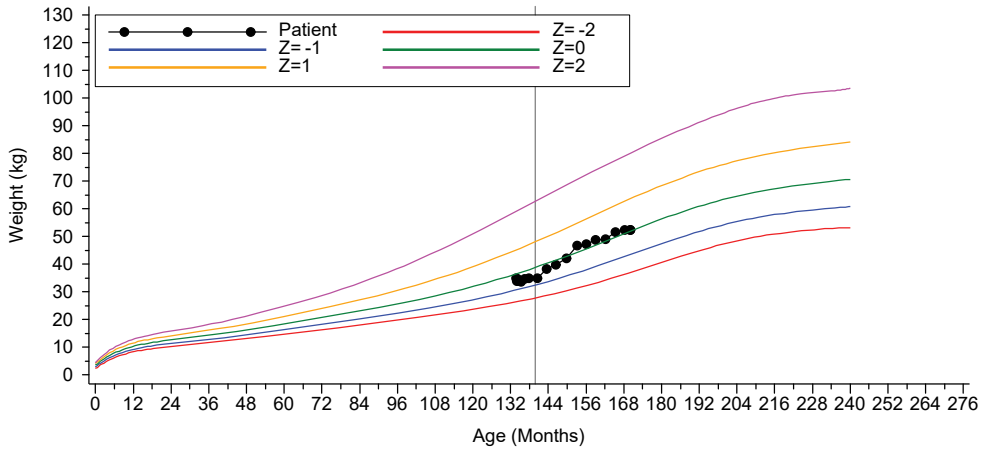

Patient 42  
Seizure History: Partial Onset Seizures

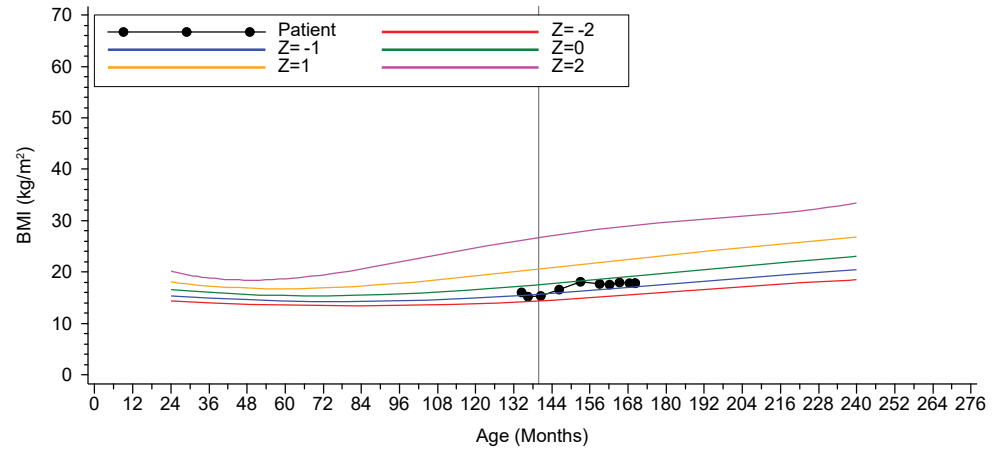

Patient 43  
Seizure History: Partial Onset Seizures

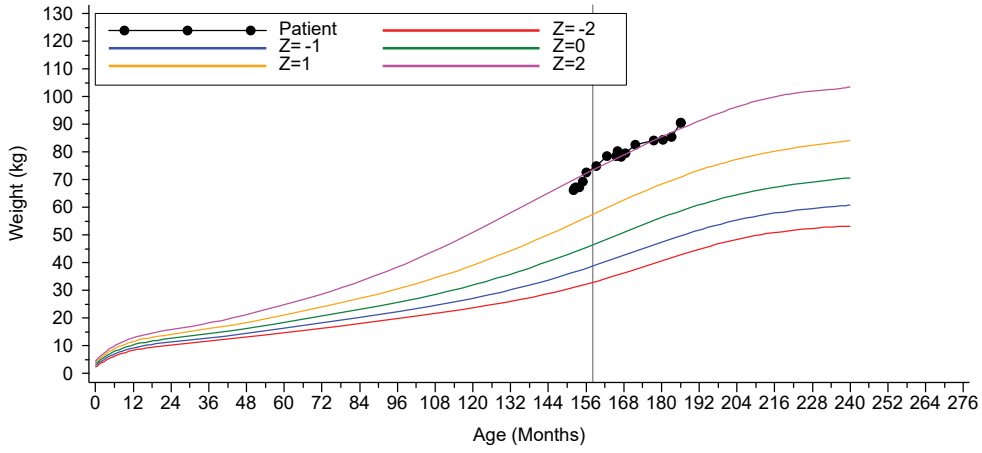

Patient 43  
Seizure History: Partial Onset Seizures

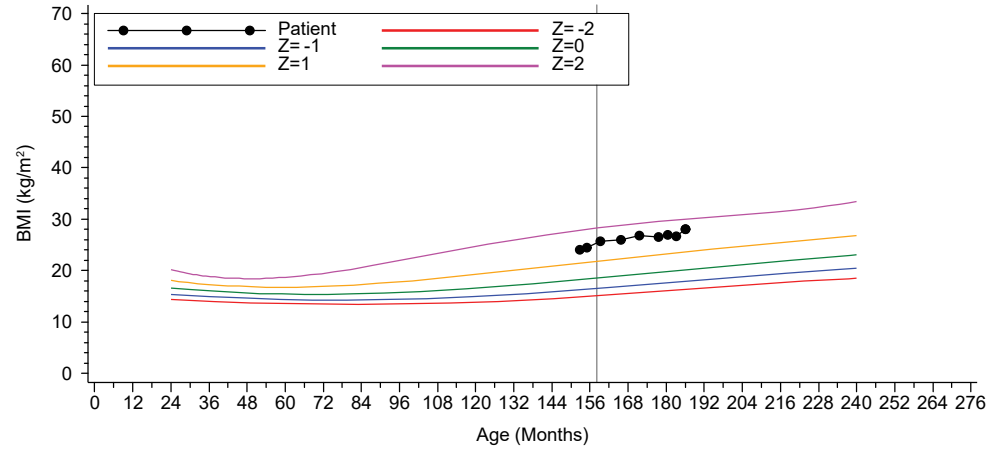

Patient 44  
Seizure History: Partial Onset Seizures

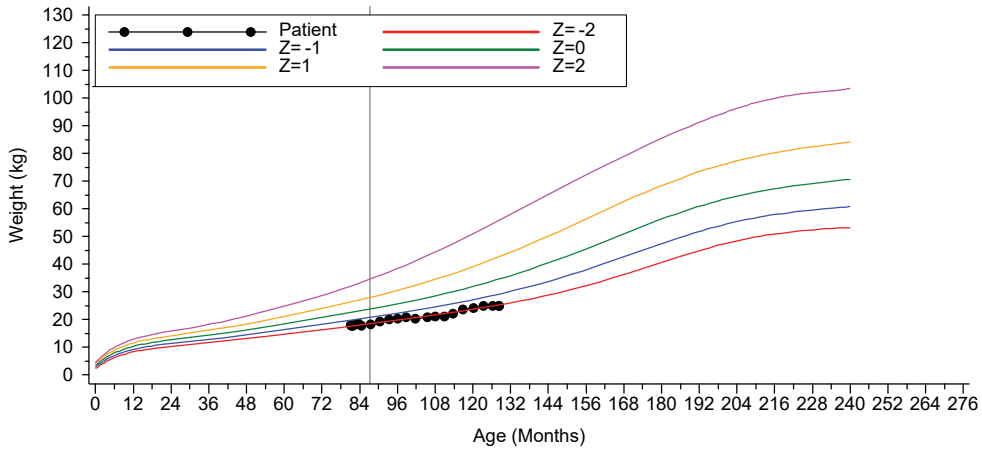

Patient 44  
Seizure History: Partial Onset Seizures

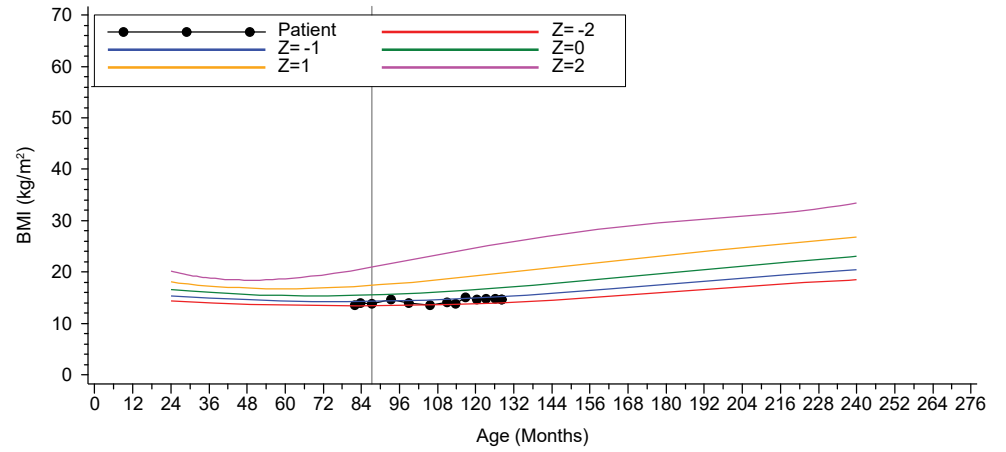

Patient 45  
Seizure History: Partial Onset Seizures

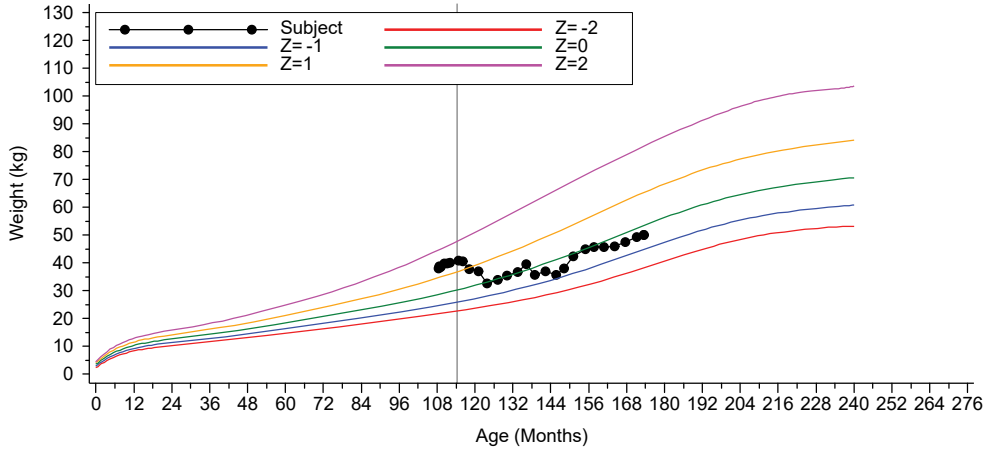

Patient 45  
Seizure History: Partial Onset Seizures

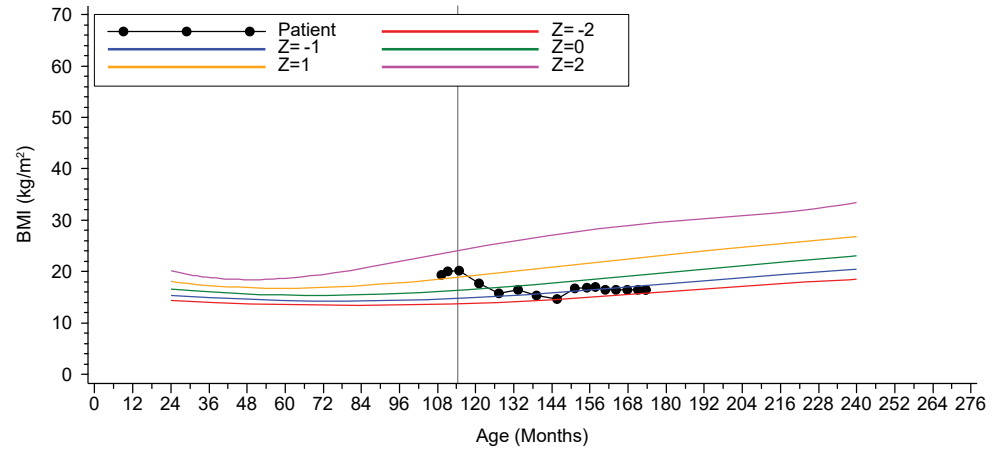

Patient 46  
Seizure History: Partial Onset Seizures

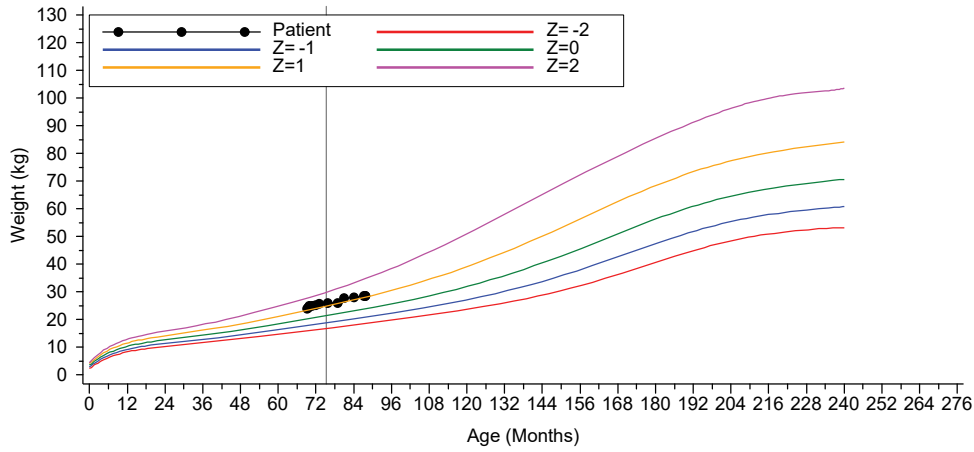

Patient 46  
Seizure History: Partial Onset Seizures

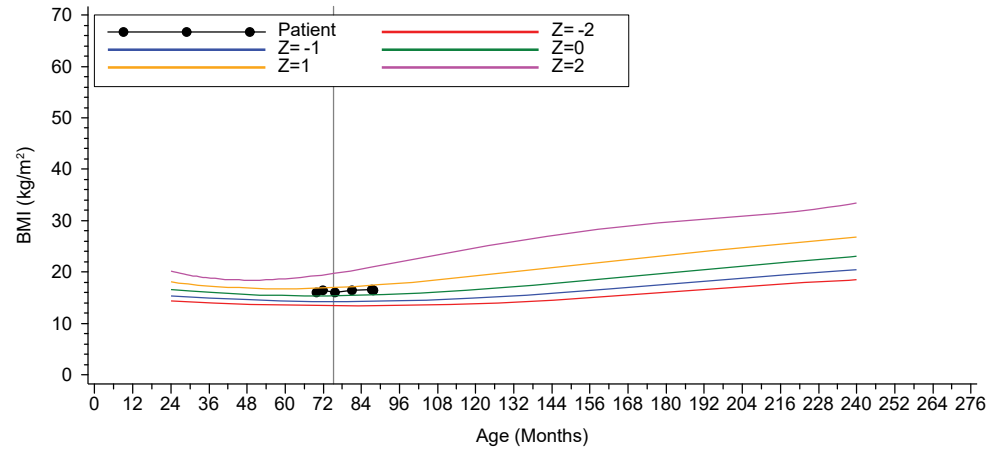



Patient 47  
Seizure History: Partial Onset Seizures

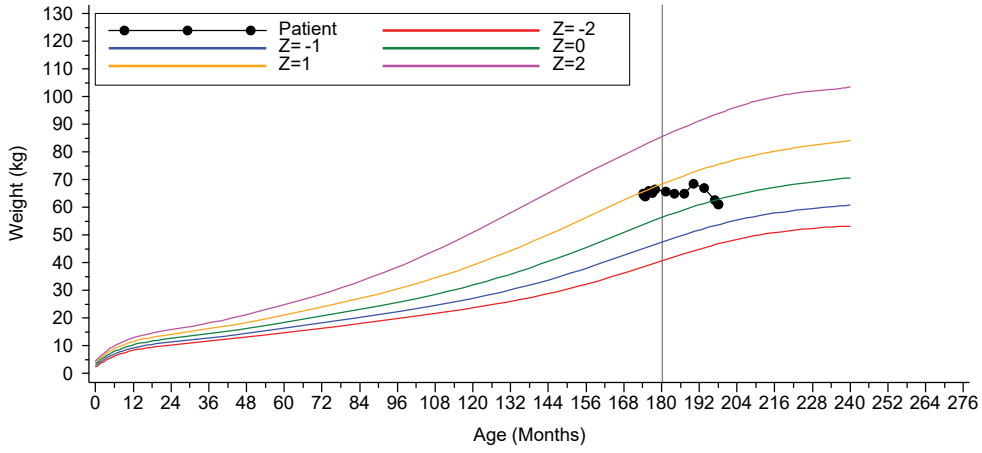

Patient 47  
Seizure History: Partial Onset Seizures

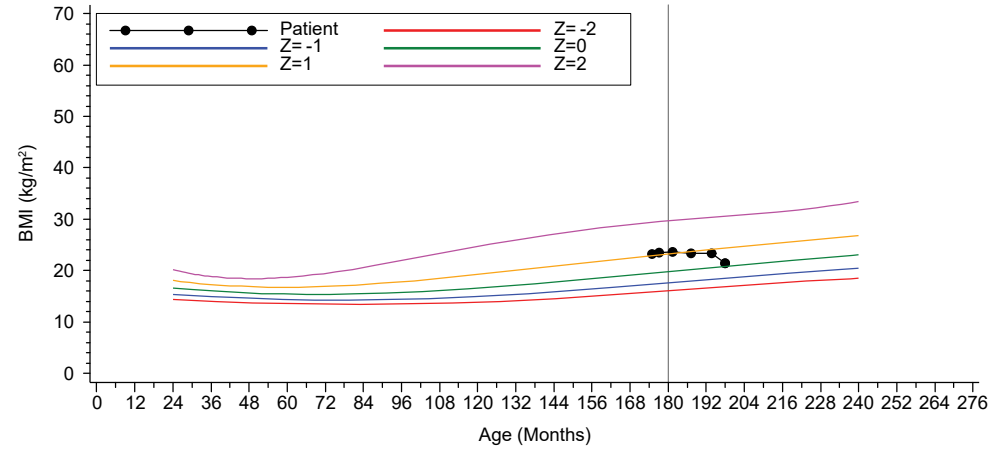

Patient 48  
Seizure History: Partial Onset Seizures

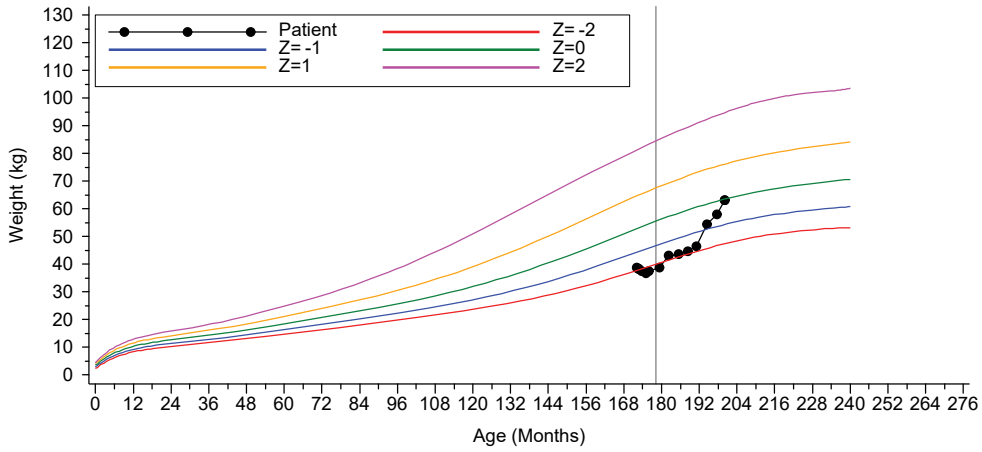

Patient 48  
Seizure History: Partial Onset Seizures

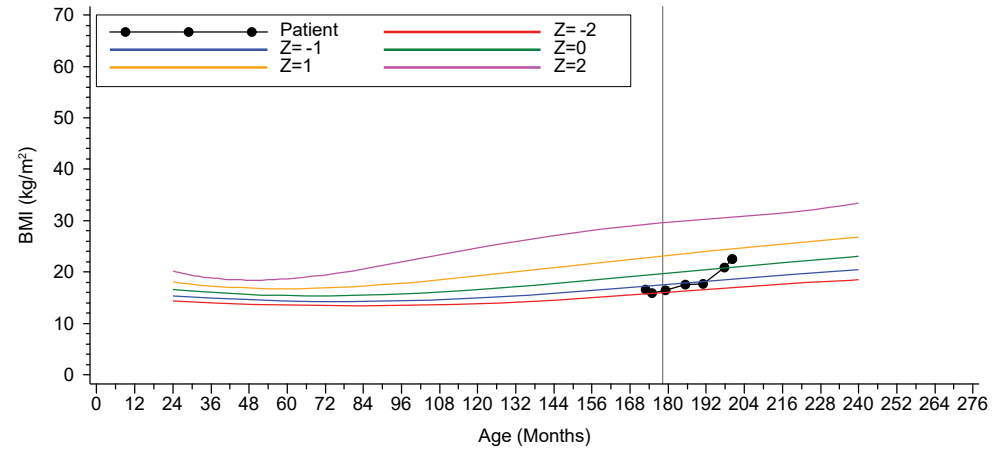

Patient 49  
Seizure History: Partial Onset Seizures

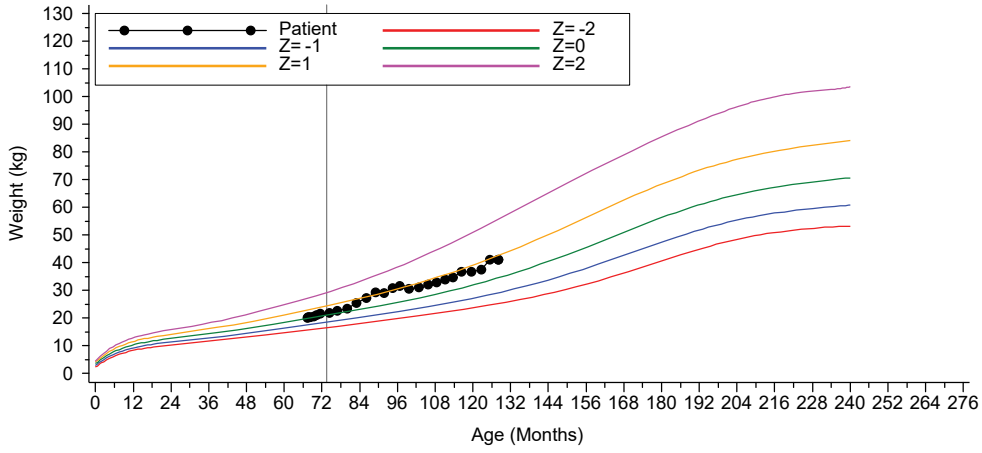

Patient 49  
Seizure History: Partial Onset Seizures

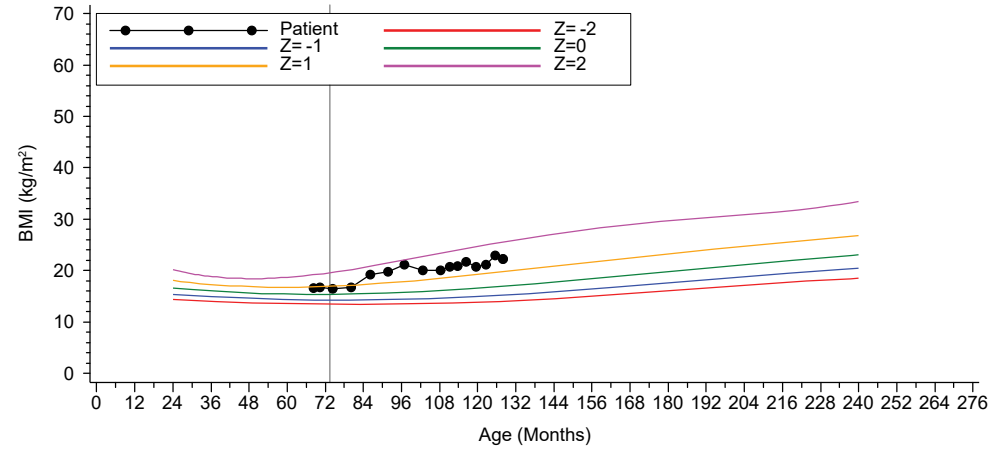

Patient 50  
Seizure History: Partial Onset Seizures

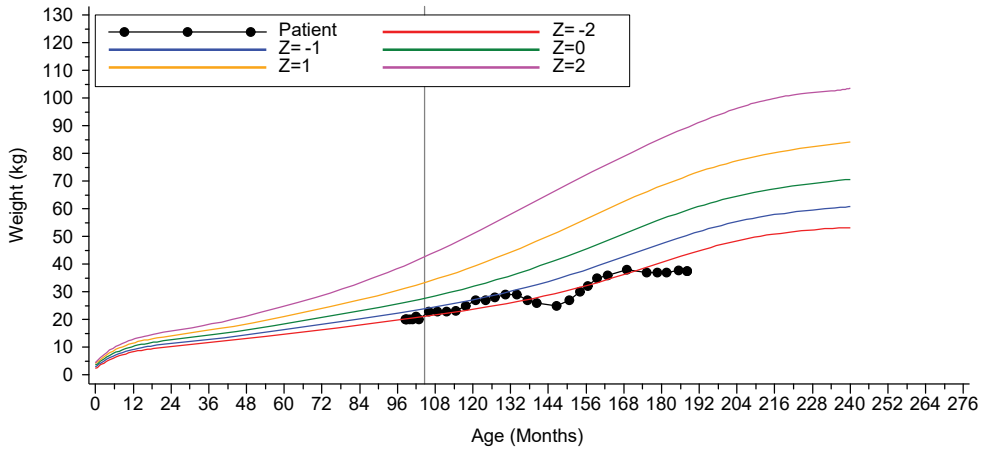

Patient 50  
Seizure History: Partial Onset Seizures

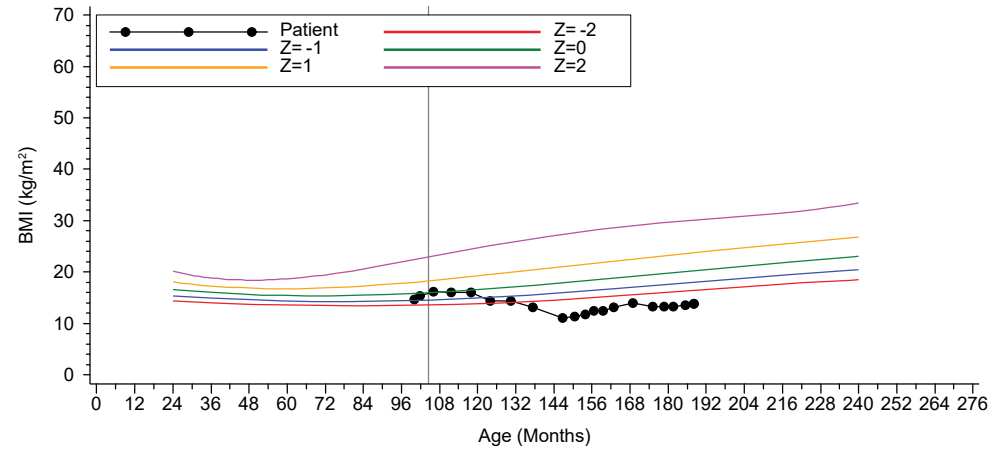

Patient 51  
Seizure History: Partial Onset Seizures

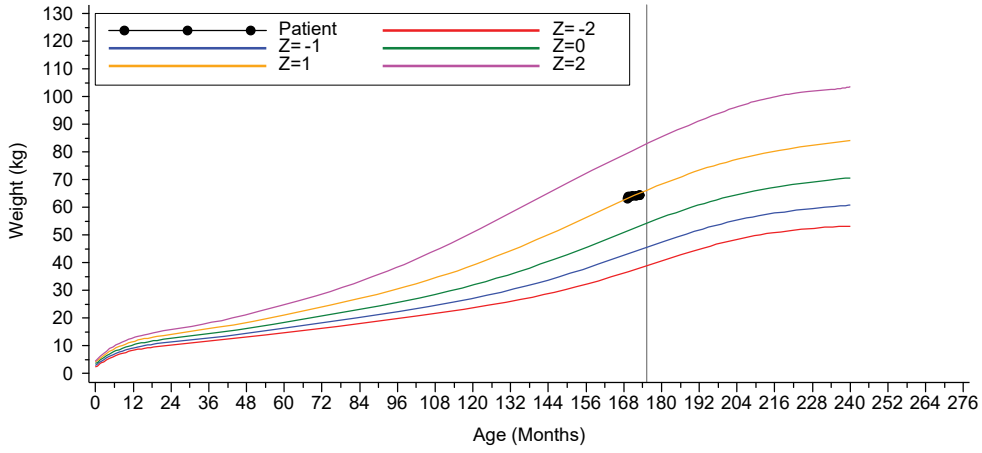

Patient 51  
Seizure History: Partial Onset Seizures

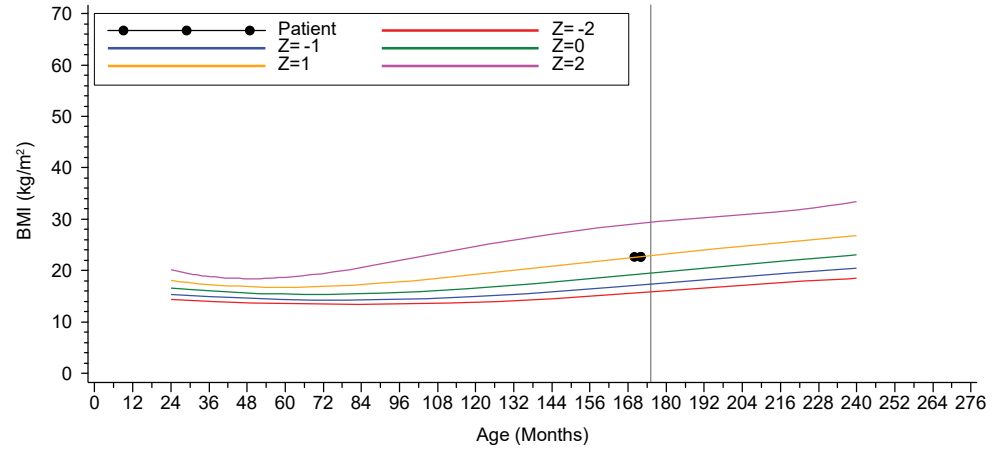

Patient 52  
Seizure History: Partial Onset Seizures

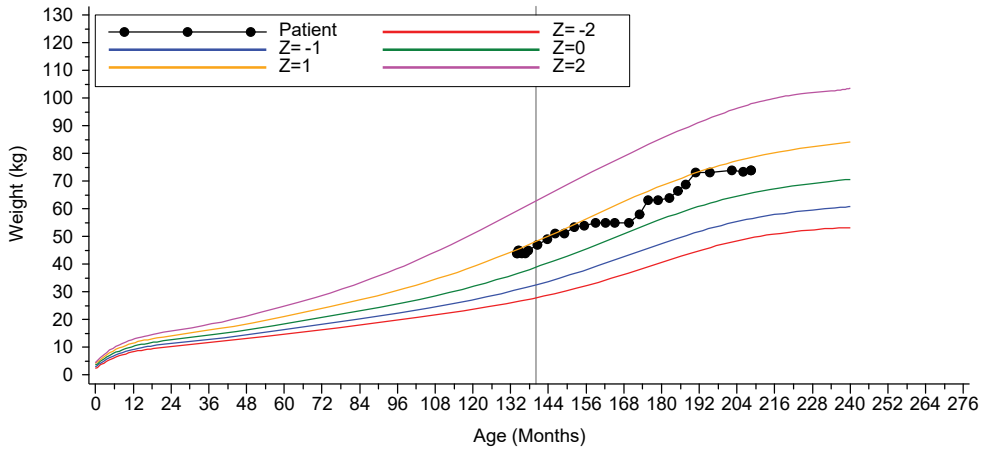

Patient 52  
Seizure History: Partial Onset Seizures

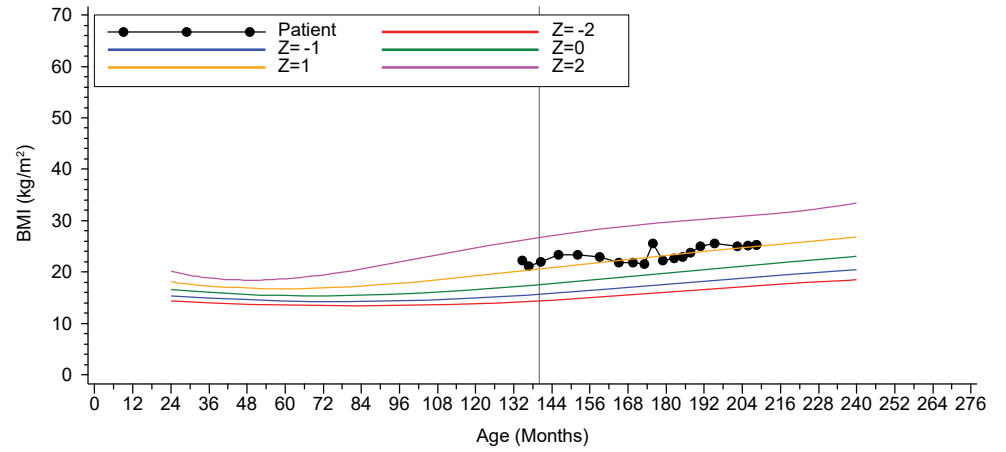

Patient 53  
Seizure History: Partial Onset Seizures

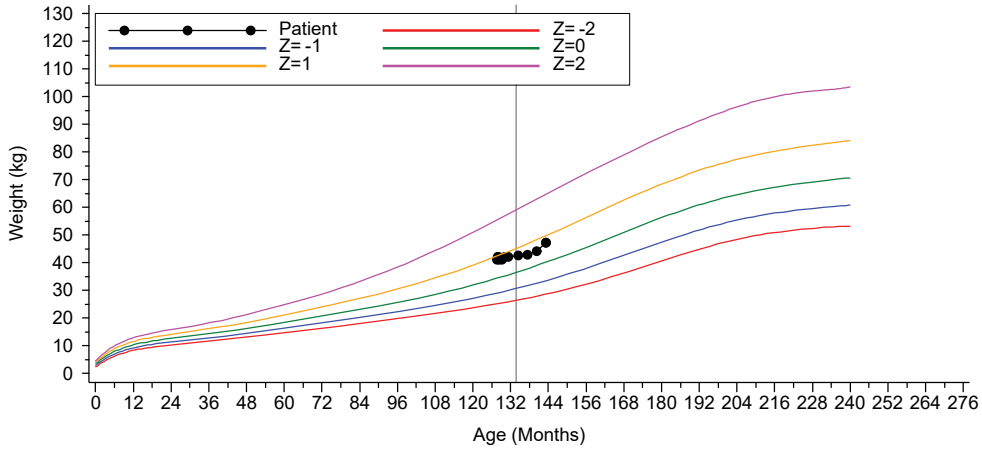

Patient 53  
Seizure History: Partial Onset Seizures

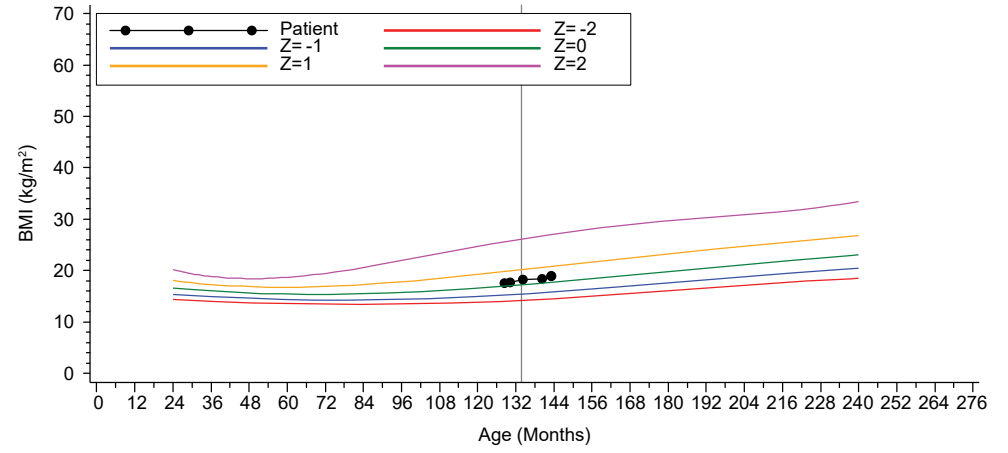

Patient 54  
Seizure History: Partial Onset Seizures

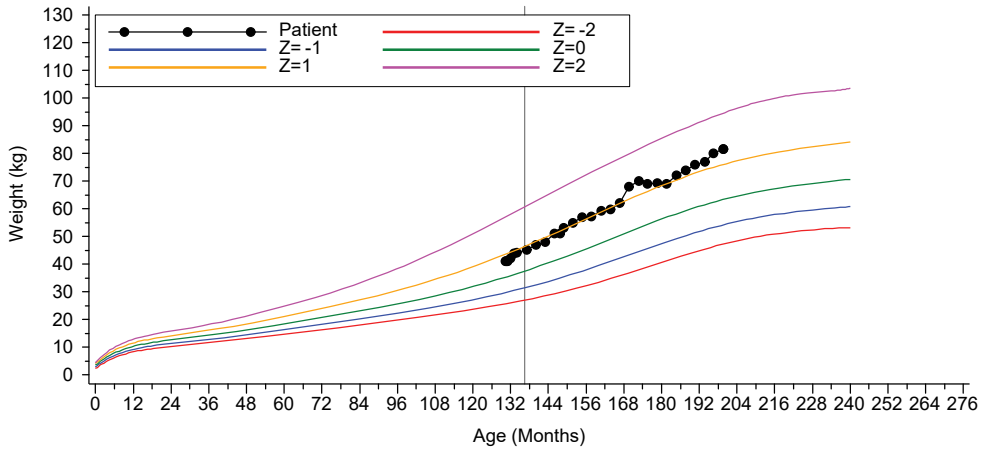

Patient 54  
Seizure History: Partial Onset Seizures

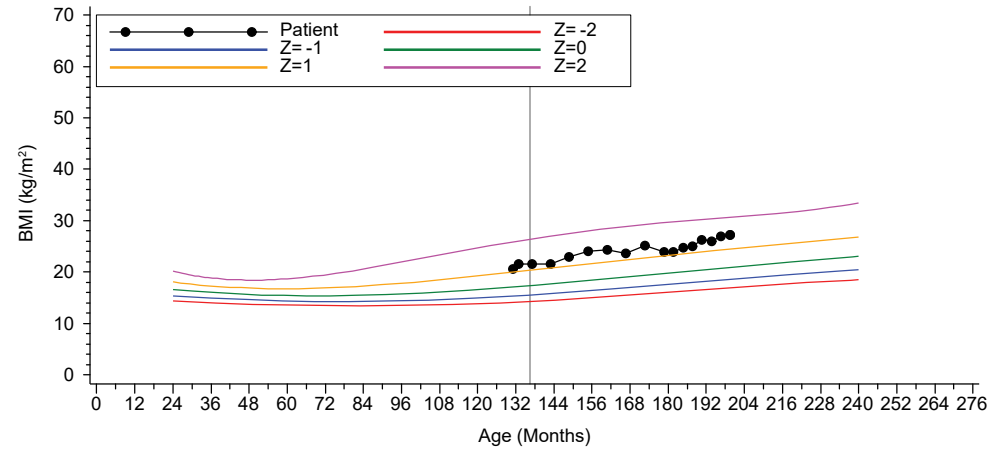

Patient 55  
Seizure History: Partial Onset Seizures

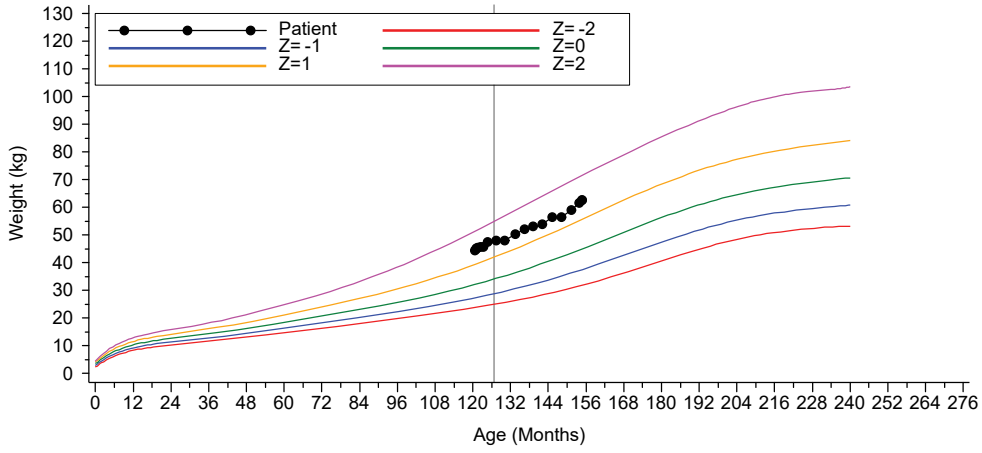

Patient 55  
Seizure History: Partial Onset Seizures

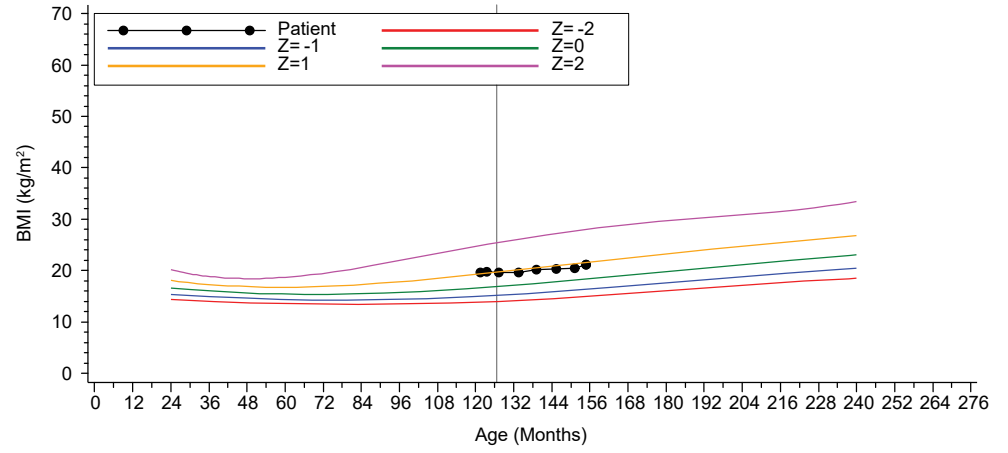

Patient 56  
Seizure History: Partial Onset Seizures

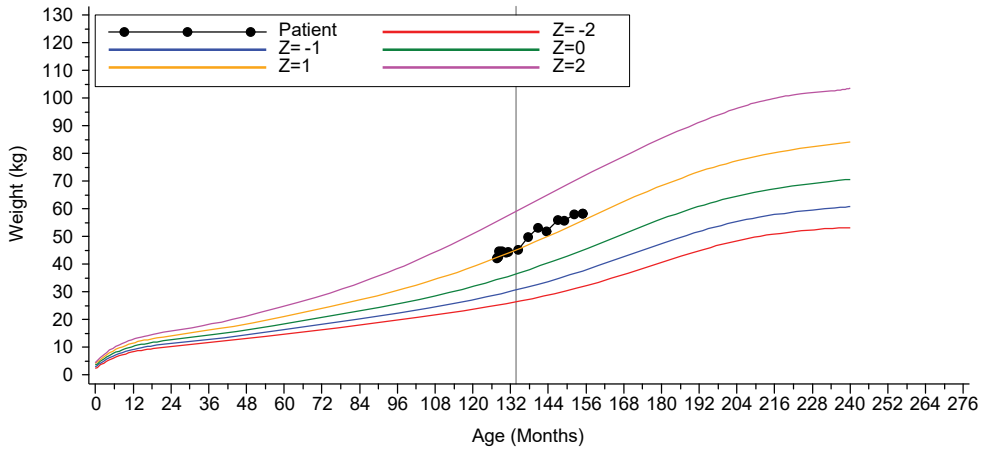

Patient 56  
Seizure History: Partial Onset Seizures

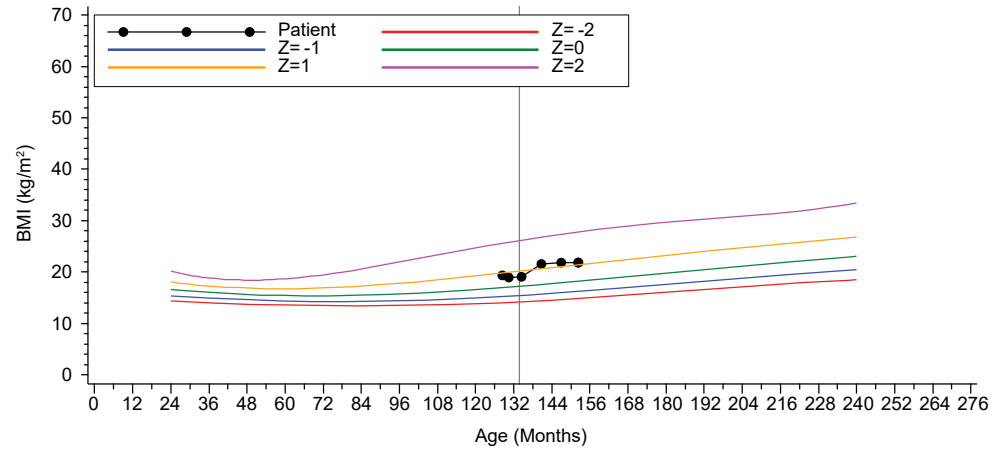

Patient 57  
Seizure History: Partial Onset Seizures

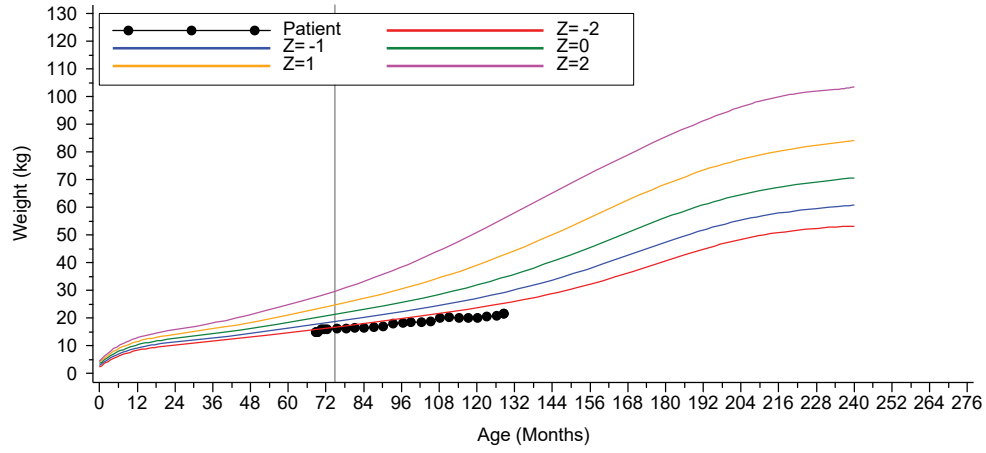

Patient 57  
Seizure History: Partial Onset Seizures

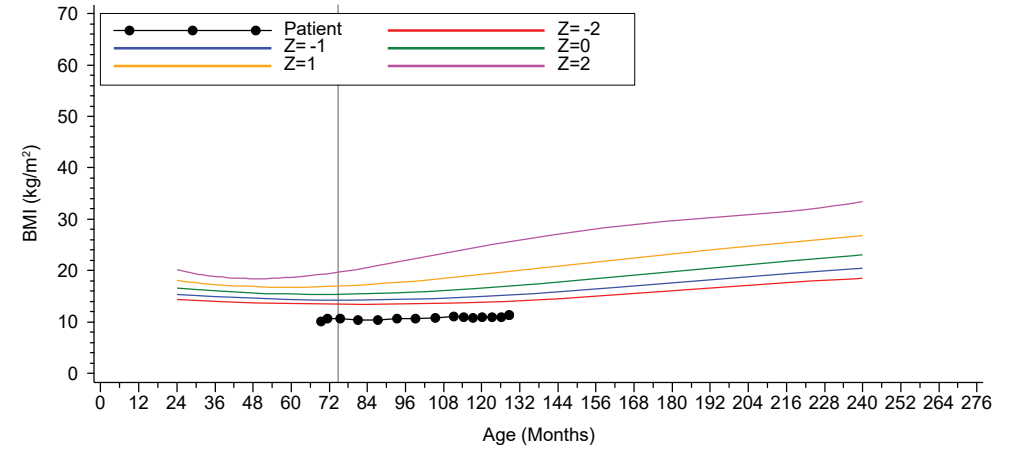

Patient 58  
Seizure History: Partial Onset Seizures

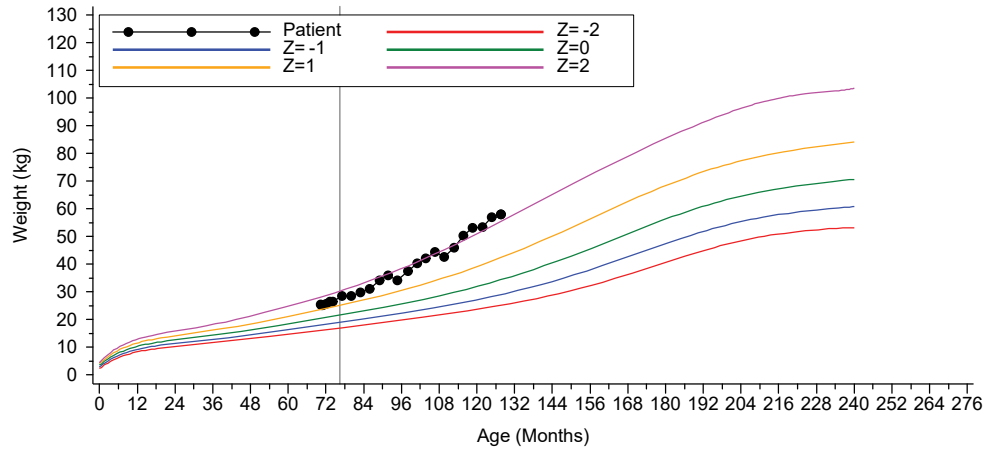

Patient 58  
Seizure History: Partial Onset Seizures

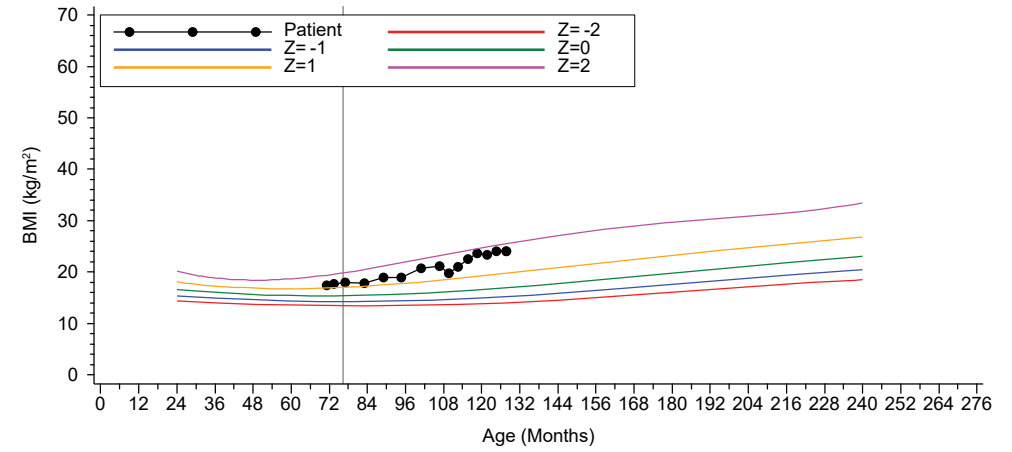

Patient 59  
Seizure History: Partial Onset Seizures

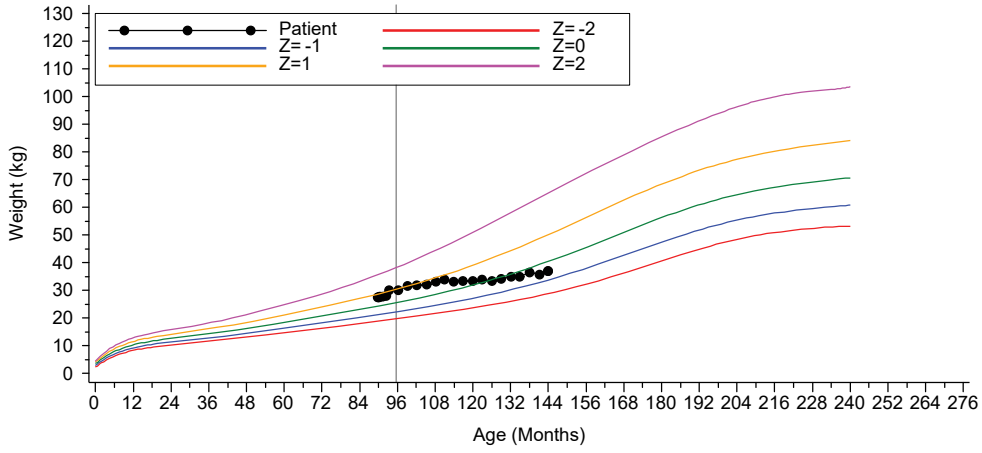

Patient 59  
Seizure History: Partial Onset Seizures

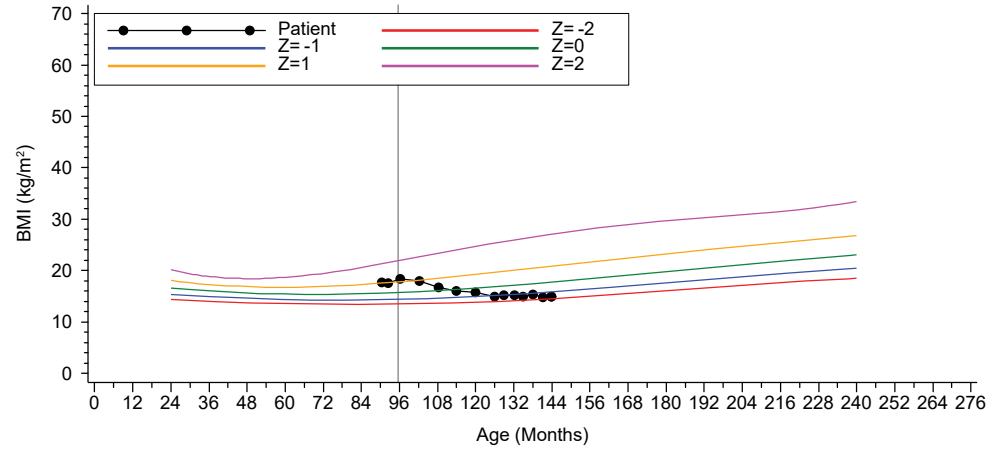

Patient 60  
Seizure History: Partial Onset Seizures

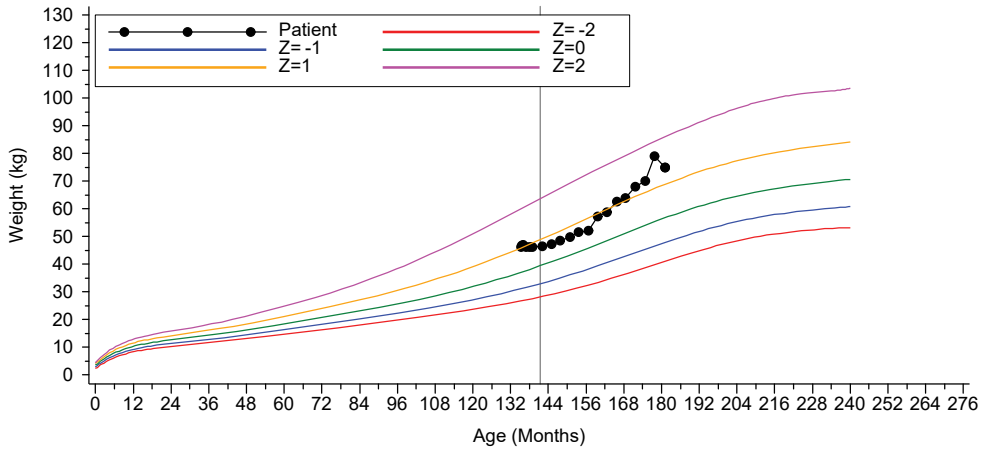

Patient 60  
Seizure History: Partial Onset Seizures

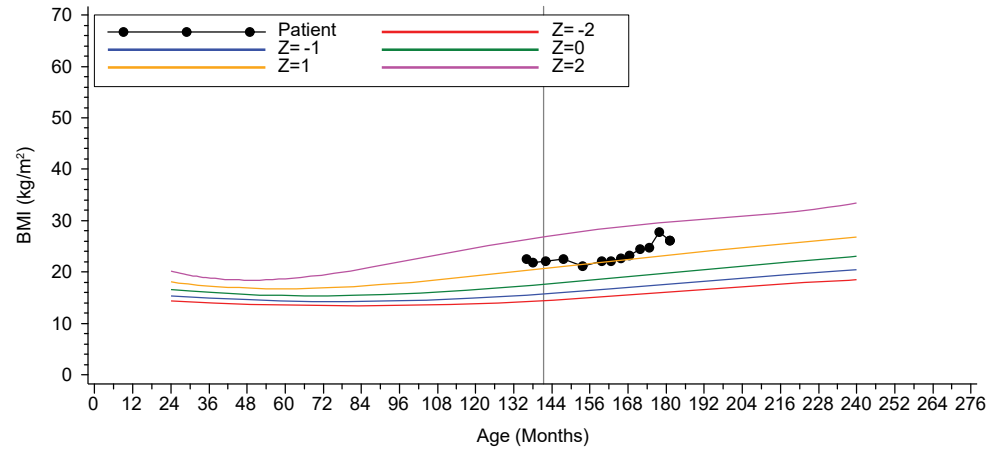

Patient 61

Seizure History: Partial Onset Seizures

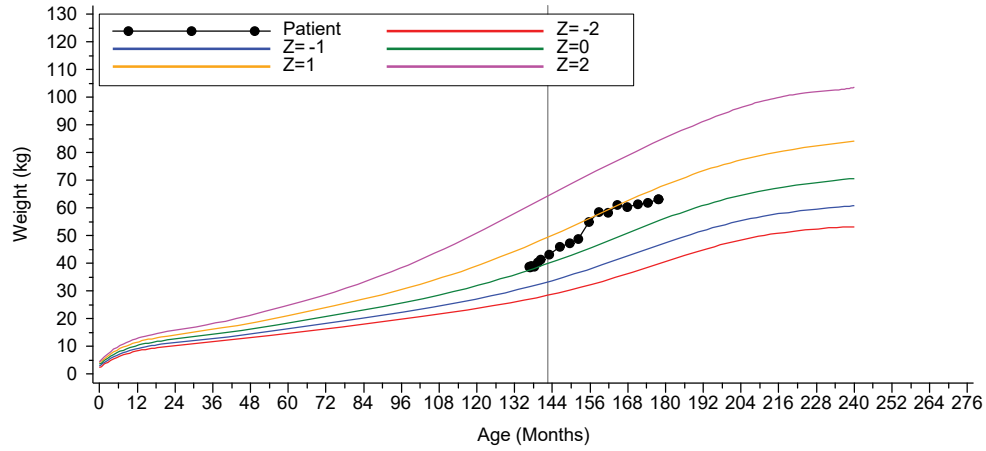

Patient 61

Seizure History: Partial Onset Seizures

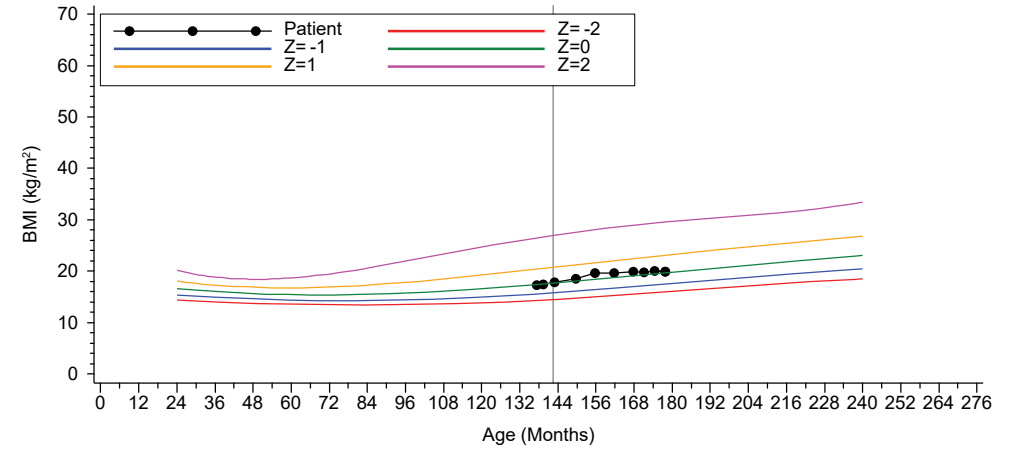

Patient 62

Seizure History: Partial Onset Seizures

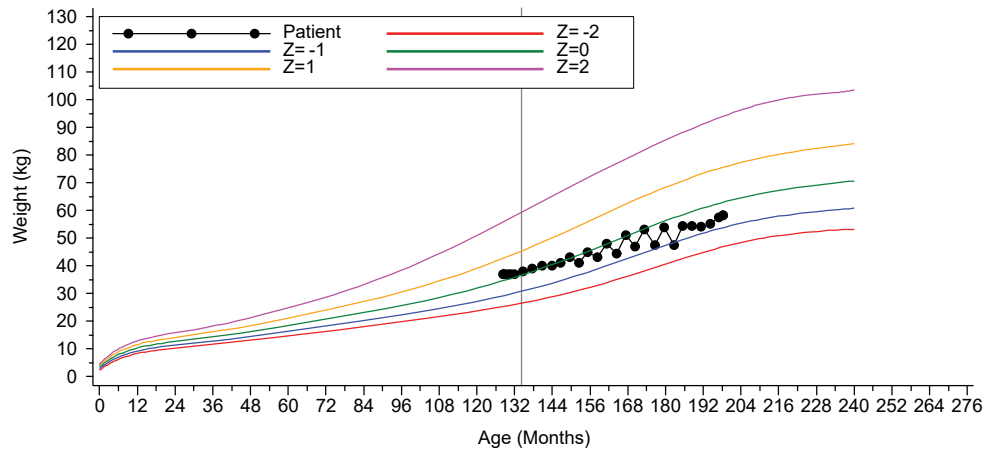

Patient 62

Seizure History: Partial Onset Seizures

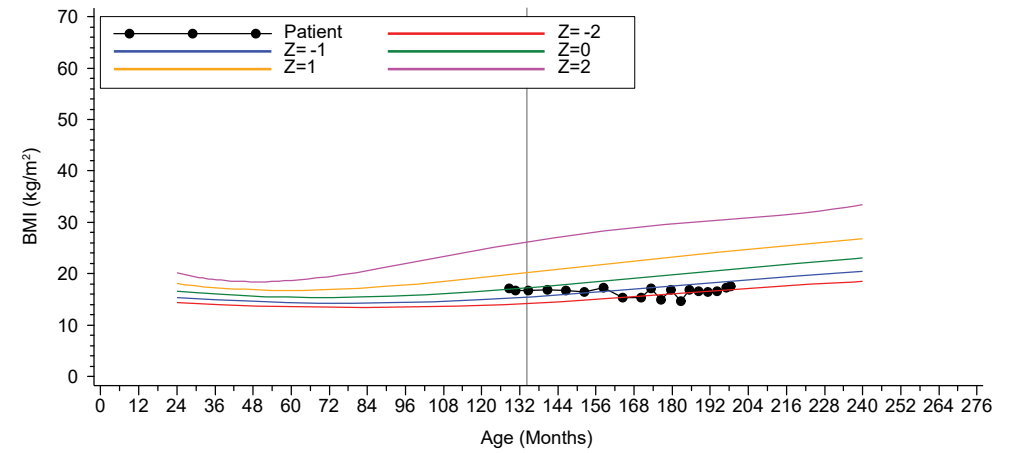



Patient 63  
Seizure History: Partial Onset Seizures

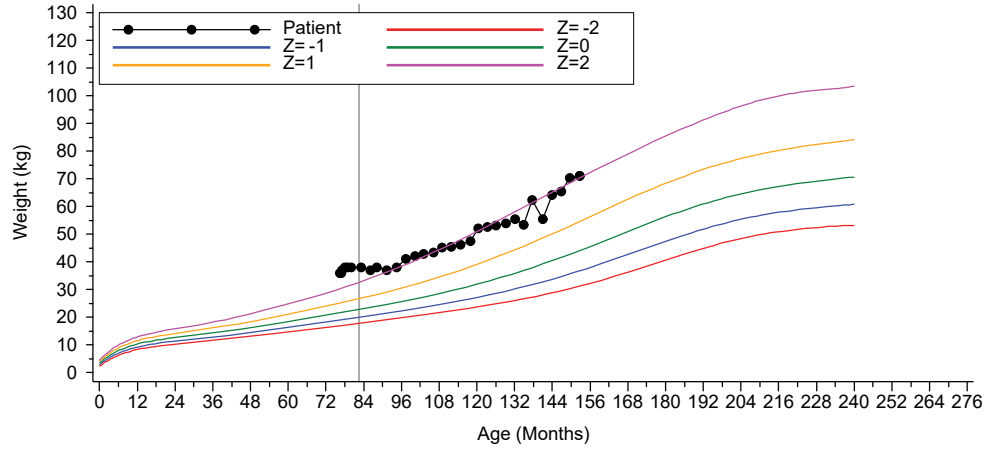

Patient 63  
Seizure History: Partial Onset Seizures

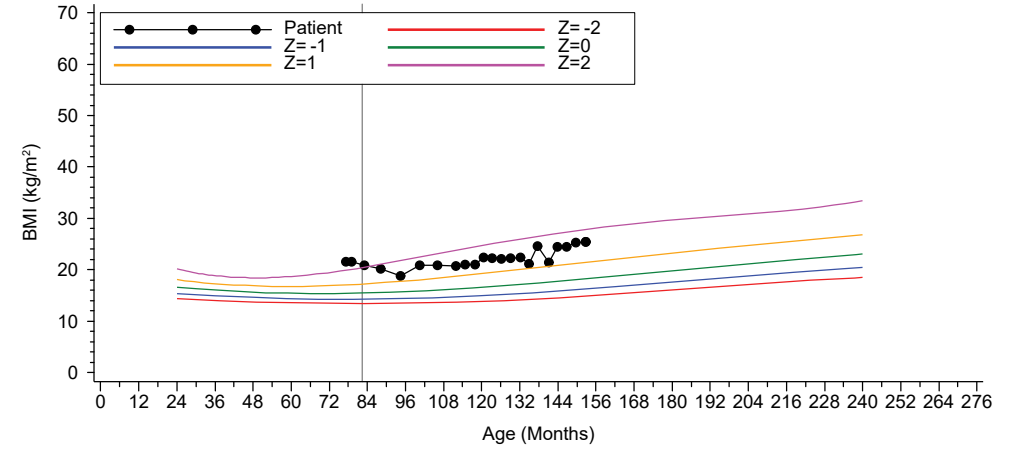

Patient 64  
Seizure History: Partial Onset Seizures

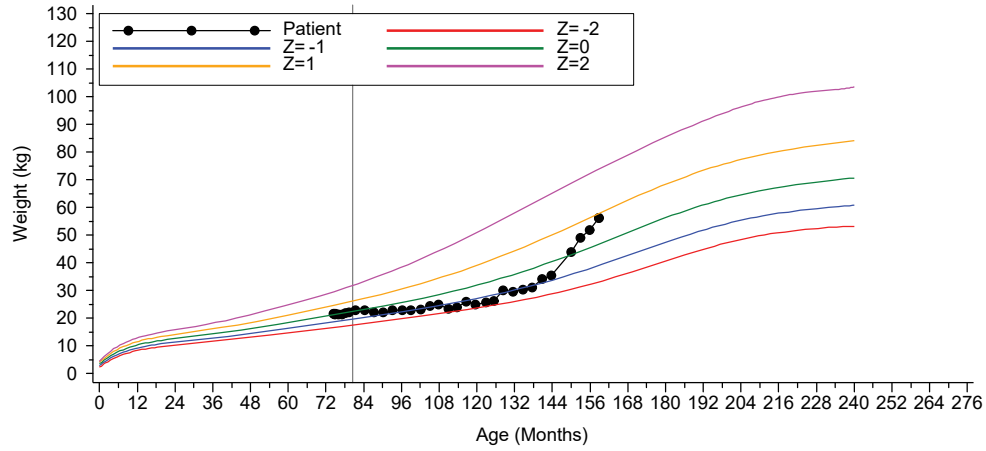

Patient 64  
Seizure History: Partial Onset Seizures

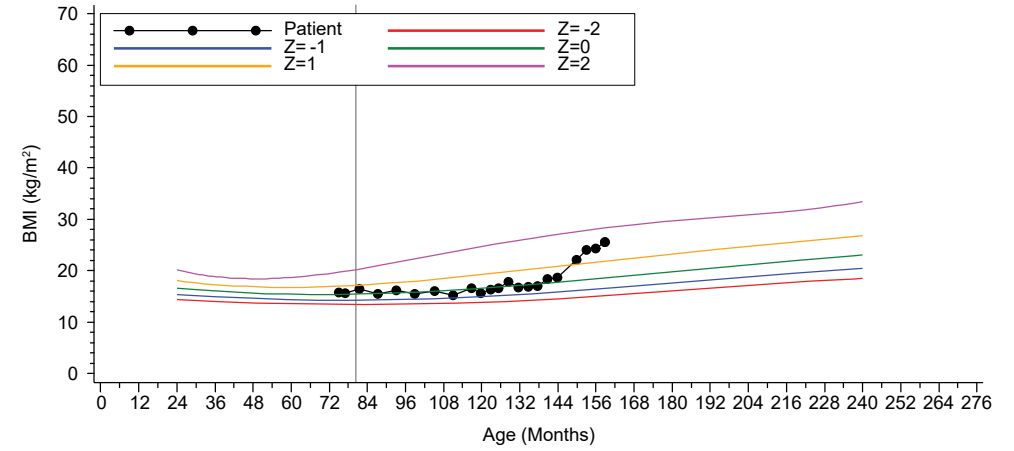

Patient 65  
Seizure History: Partial Onset Seizures

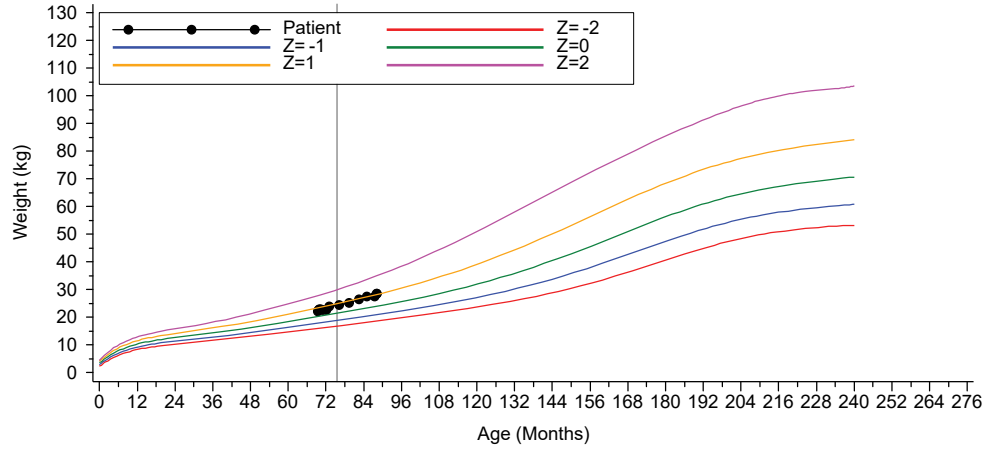

Patient 65  
Seizure History: Partial Onset Seizures

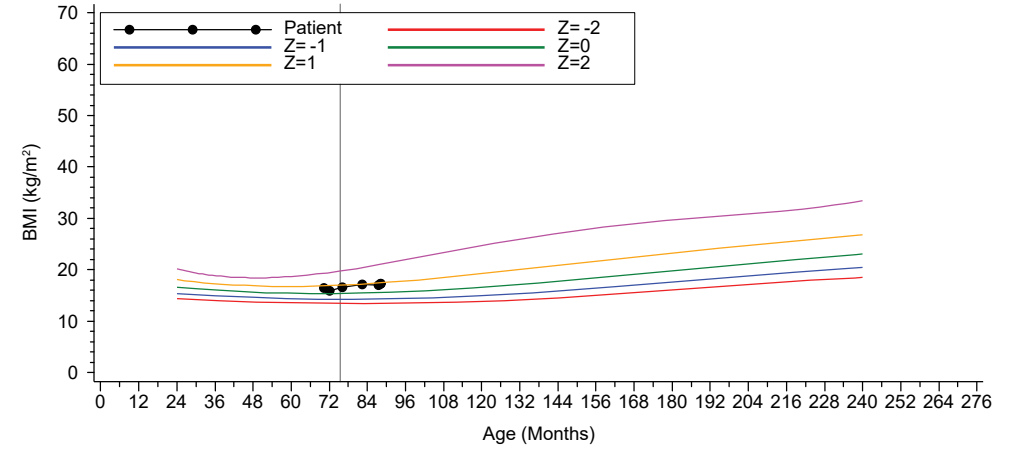

Patient 66  
Seizure History: Partial Onset Seizures

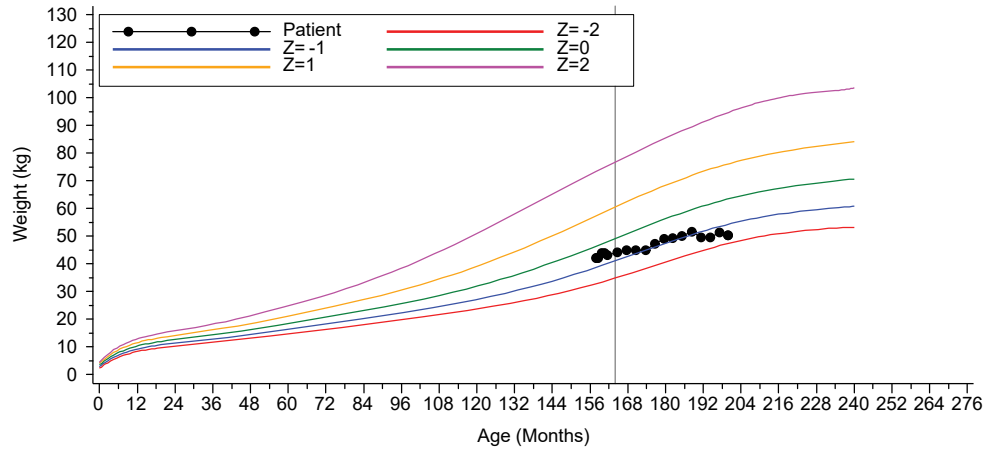

Patient 66  
Seizure History: Partial Onset Seizures

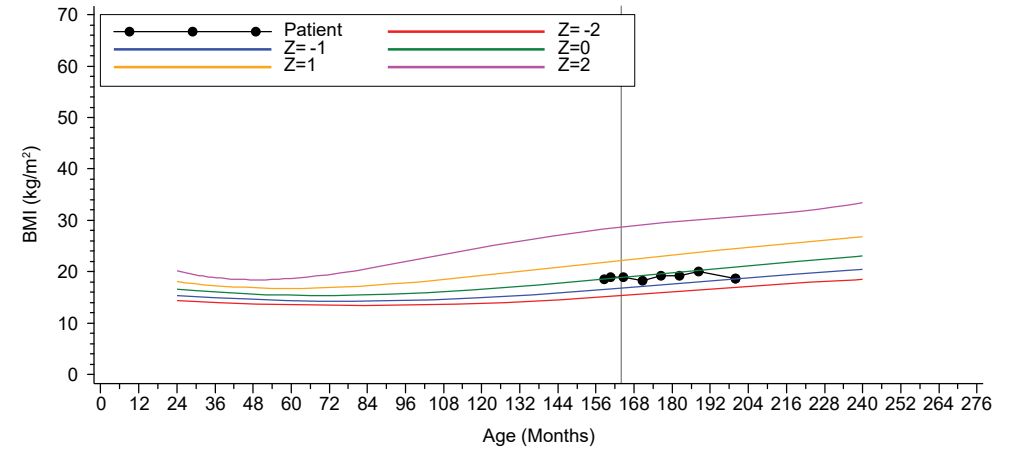

Patient 67  
Seizure History: Partial Onset Seizures

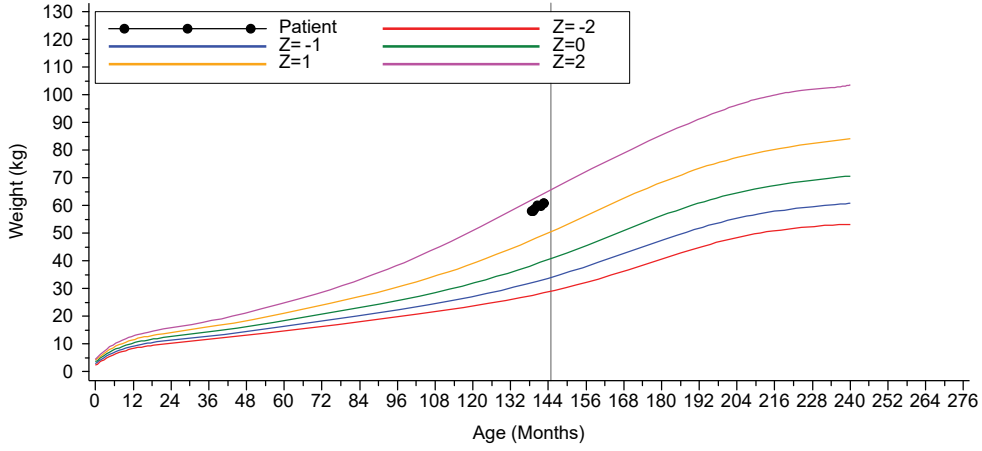

Patient 67  
Seizure History: Partial Onset Seizures

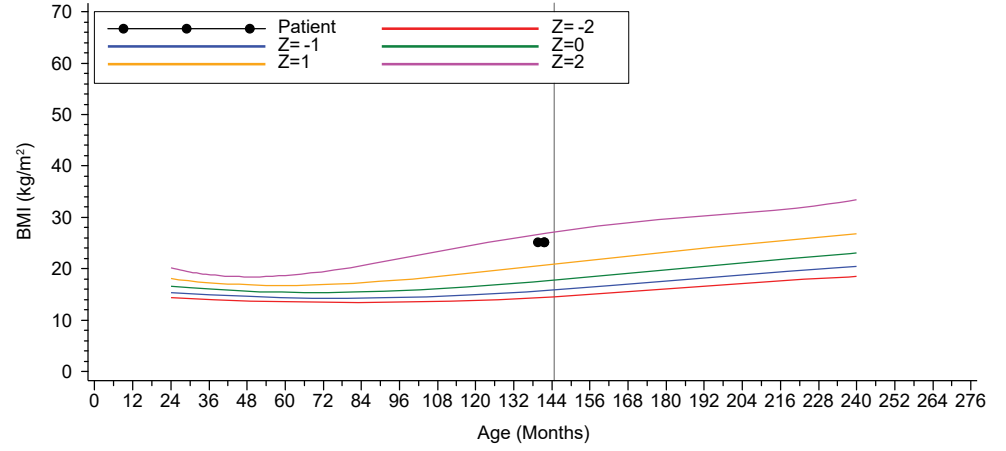

Patient 68  
Seizure History: Partial Onset Seizures

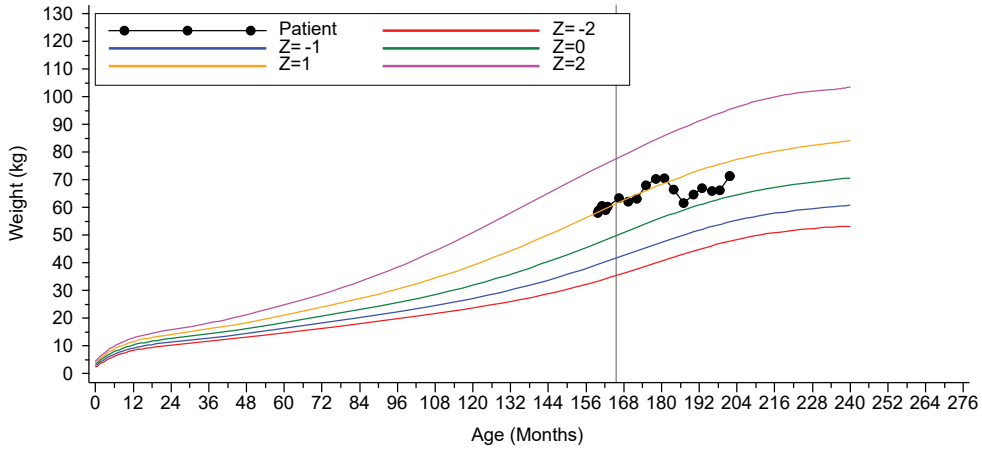

Patient 68  
Seizure History: Partial Onset Seizures

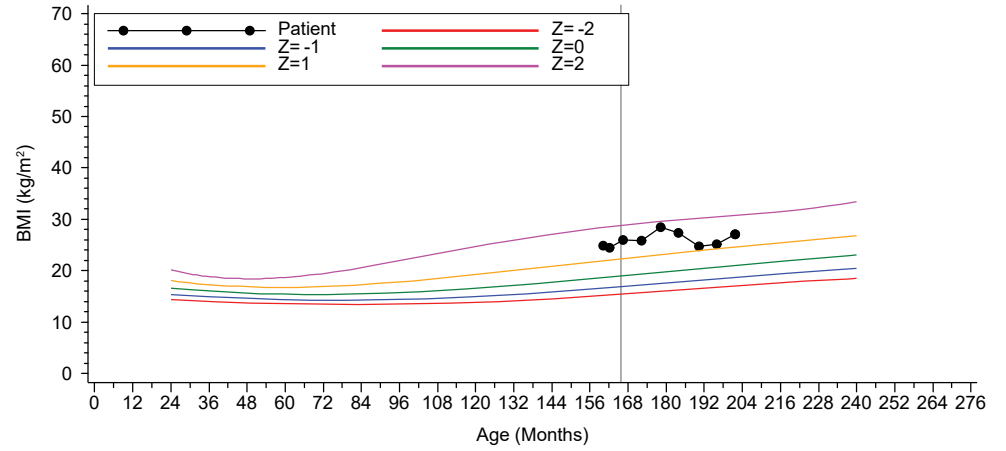

Patient 69  
Seizure History: Partial Onset Seizures

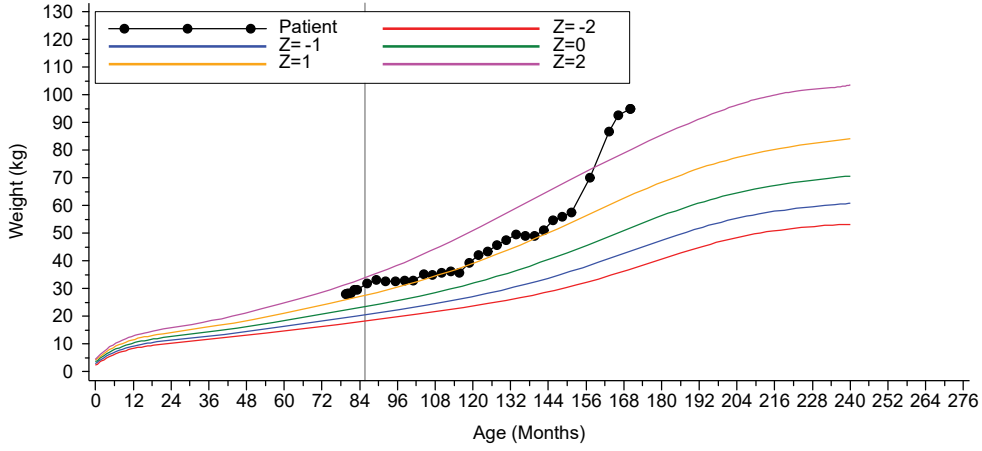

Patient 69  
Seizure History: Partial Onset Seizures

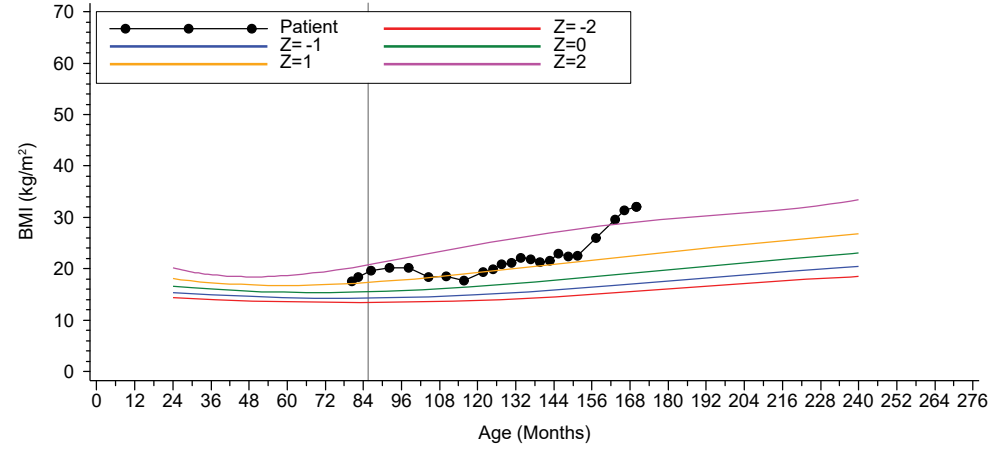

Patient 70  
Seizure History: Partial Onset Seizures

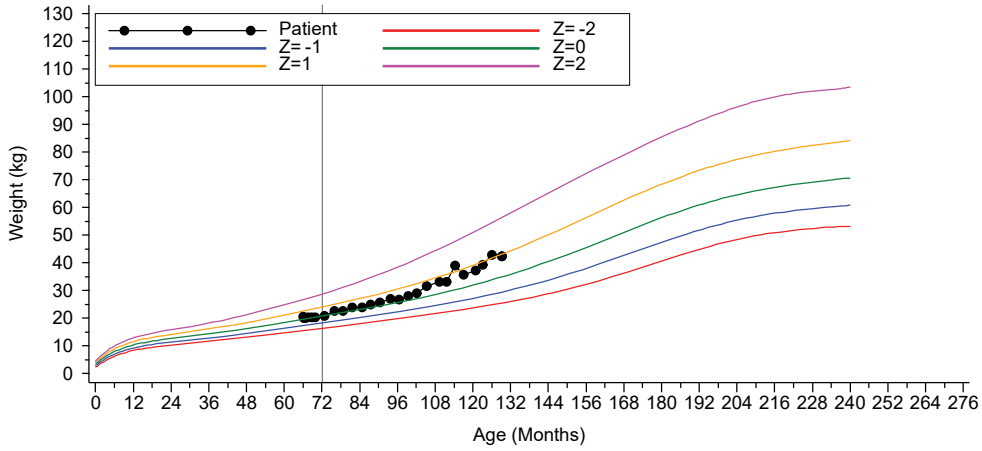

Patient 70  
Seizure History: Partial Onset Seizures

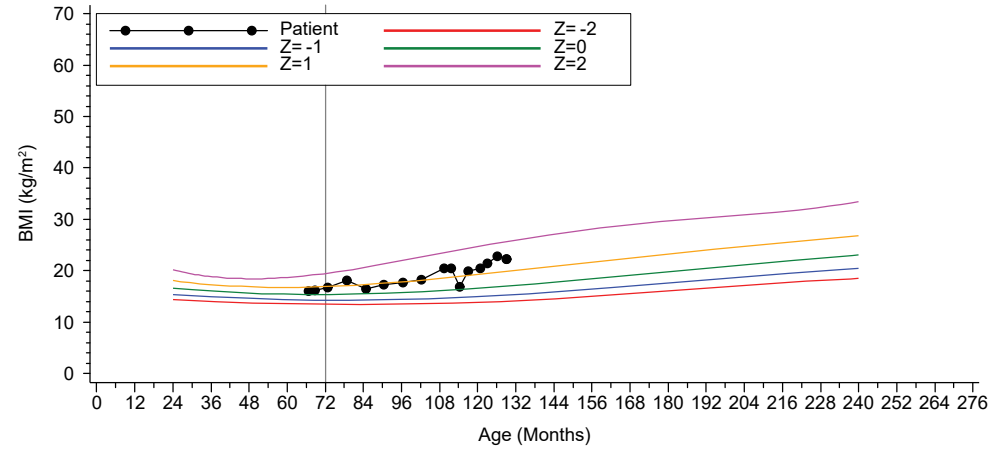

Patient 71  
Seizure History: Partial Onset Seizures

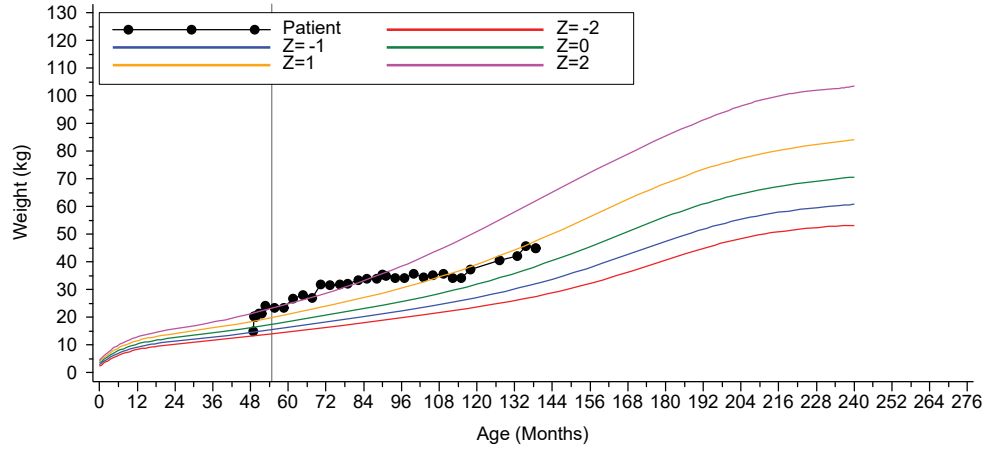

Patient 71  
Seizure History: Partial Onset Seizures

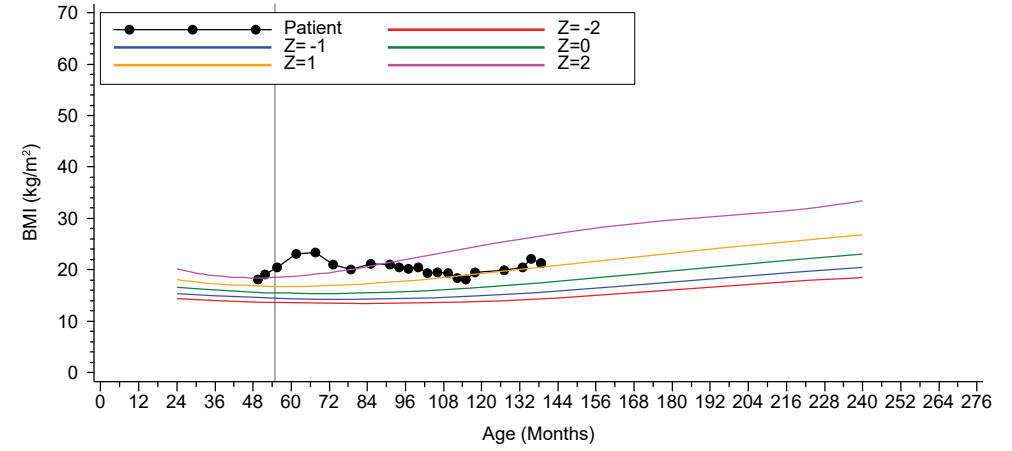

Patient 72  
Seizure History: Partial Onset Seizures

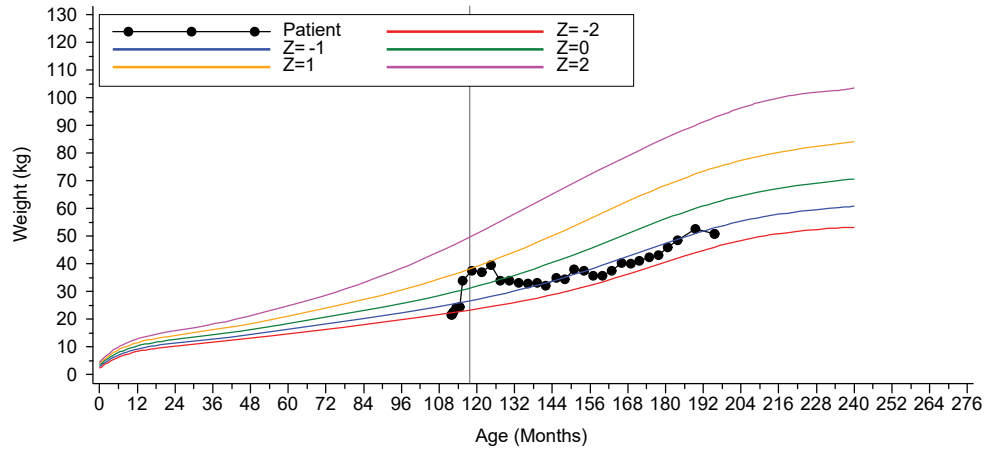

Patient 72  
Seizure History: Partial Onset Seizures

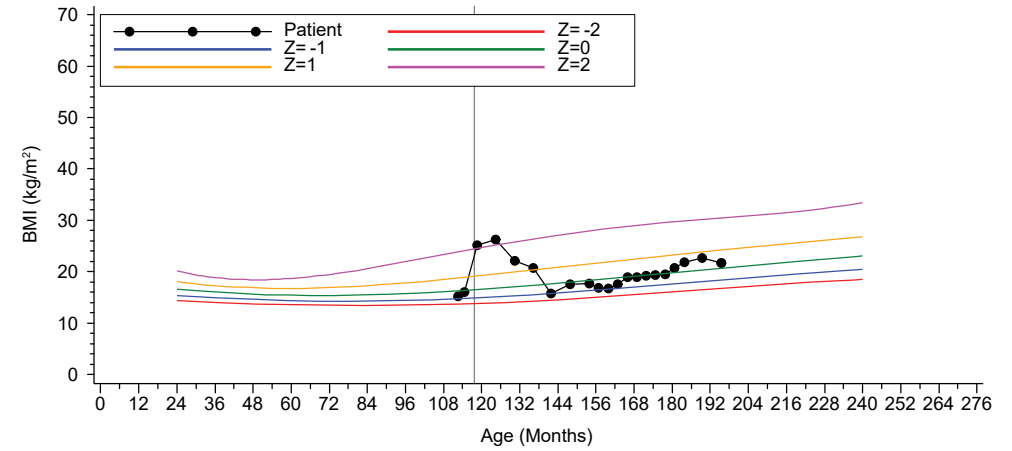

Patient 73  
Seizure History: Partial Onset Seizures

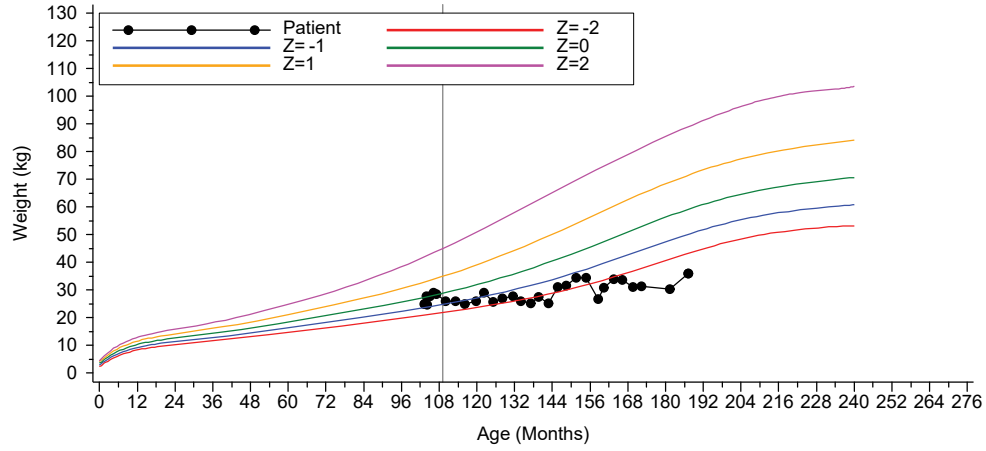

Patient 73  
Seizure History: Partial Onset Seizures

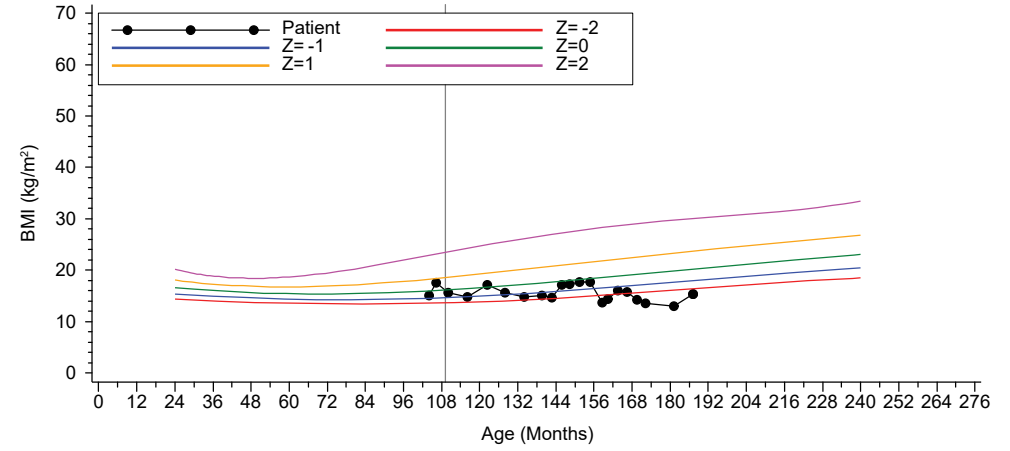

Patient 74  
Seizure History: Partial Onset Seizures

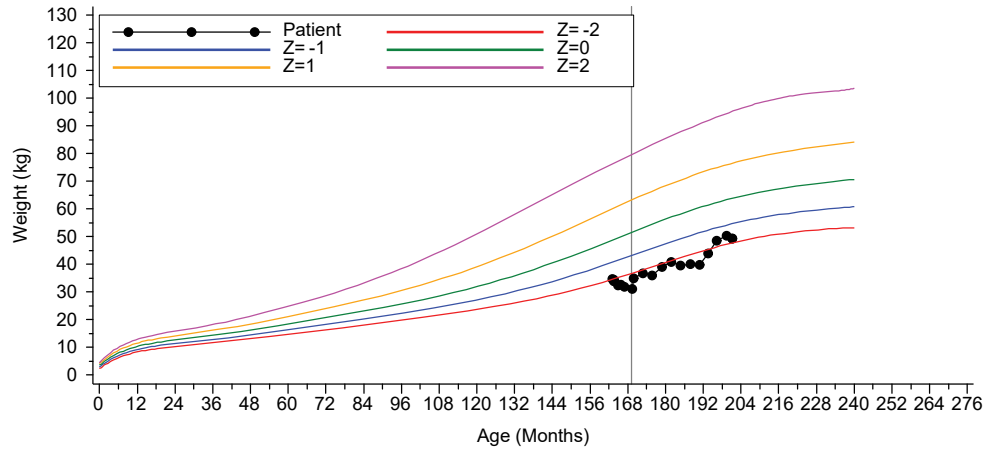

Patient 74  
Seizure History: Partial Onset Seizures

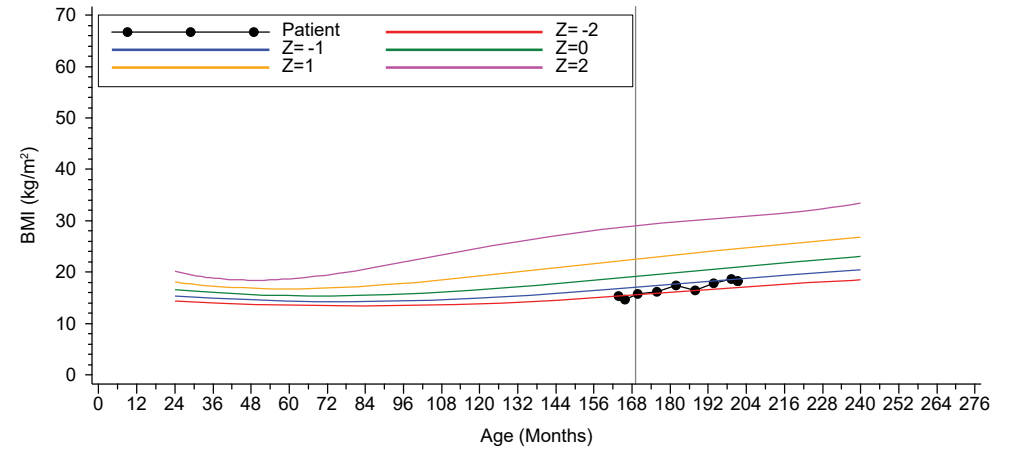

Patient 75  
Seizure History: Partial Onset Seizures

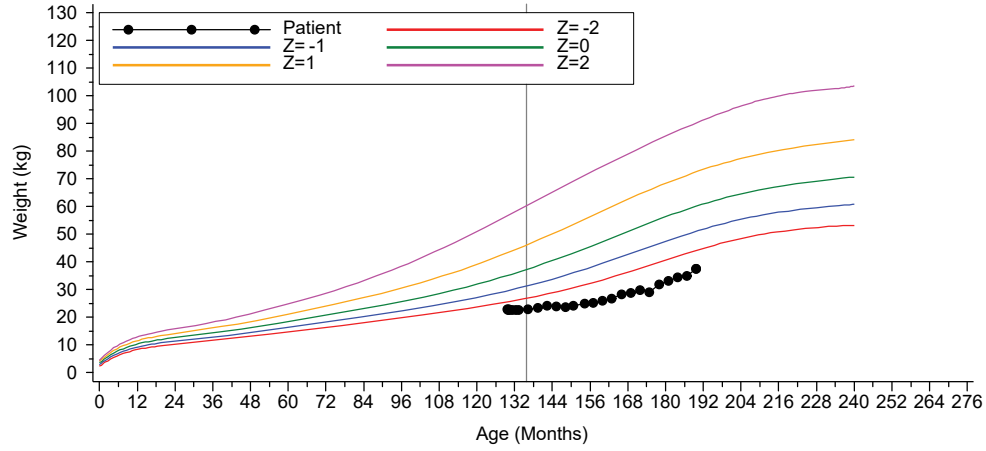

Patient 75  
Seizure History: Partial Onset Seizures

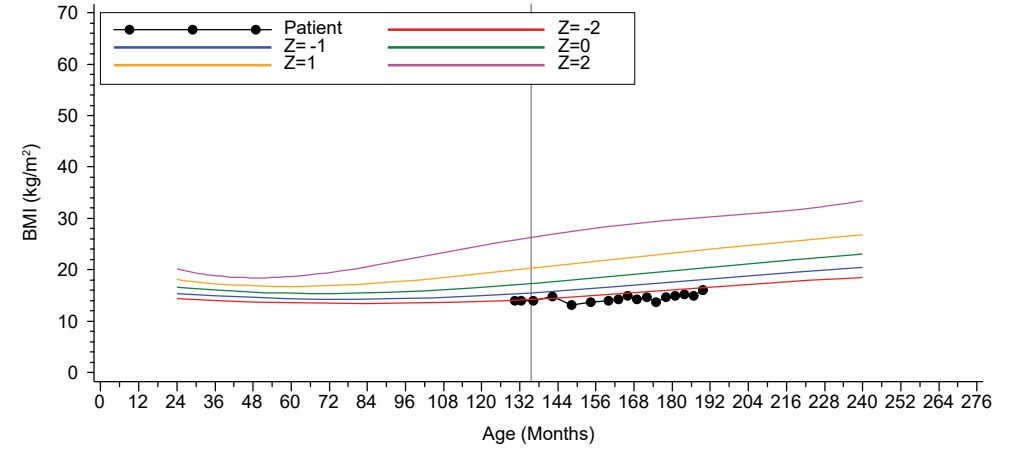

Patient 76  
Seizure History: Partial Onset Seizures

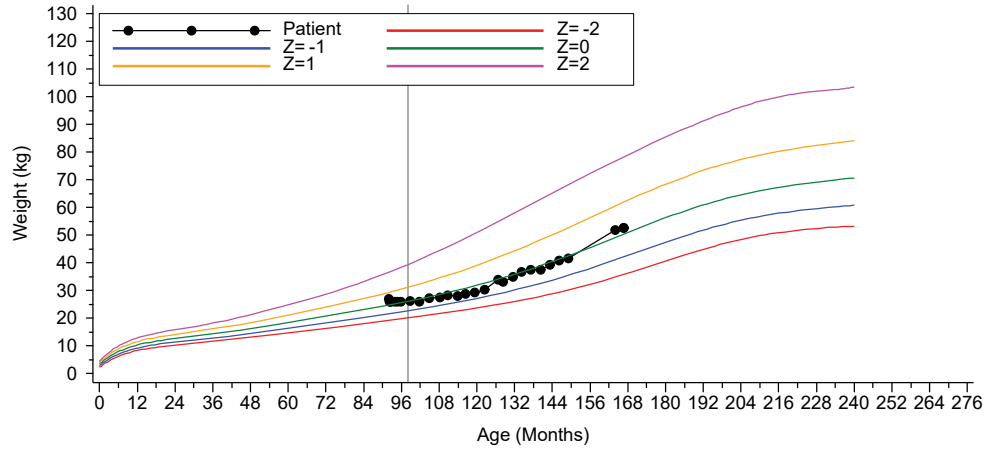

Patient 76  
Seizure History: Partial Onset Seizures

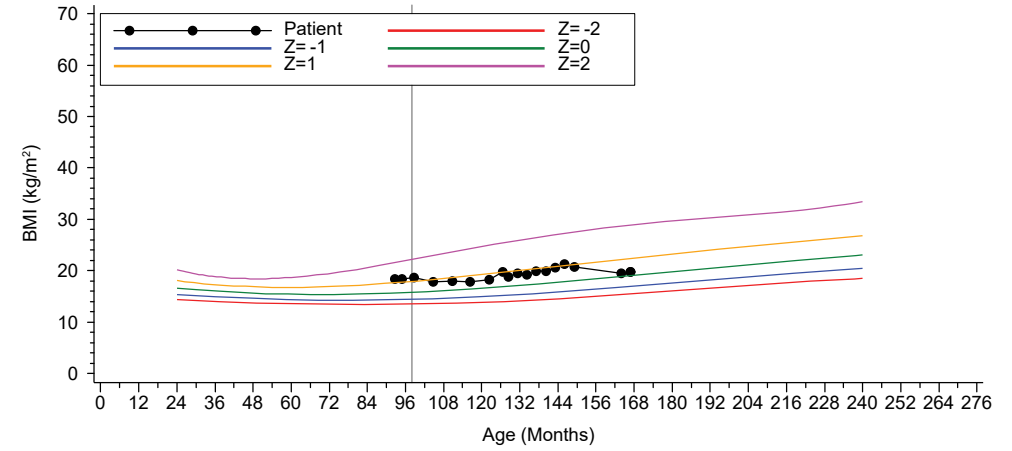

Patient 77  
Seizure History: Partial Onset Seizures

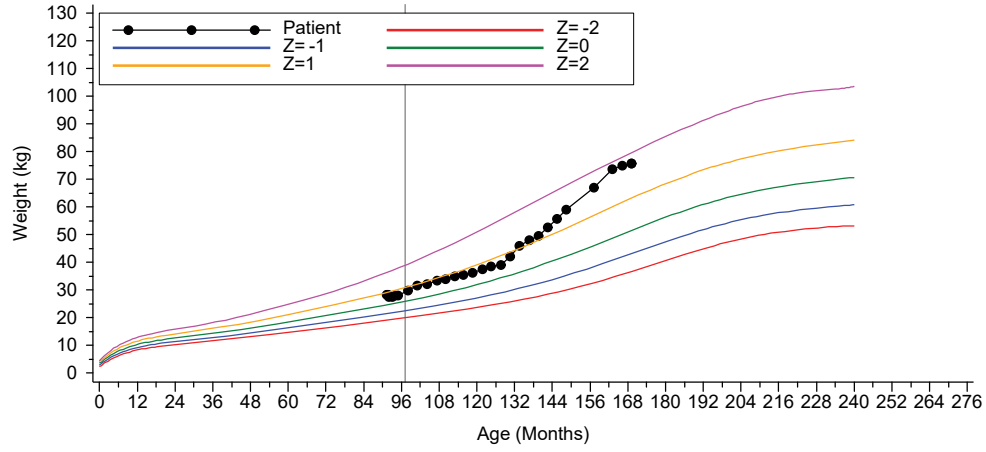

Patient 77  
Seizure History: Partial Onset Seizures

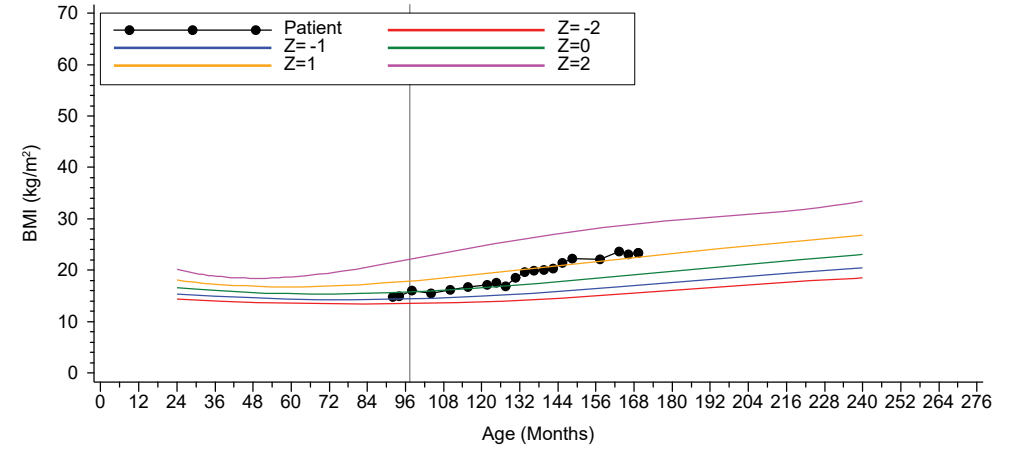

Patient 78  
Seizure History: Partial Onset Seizures

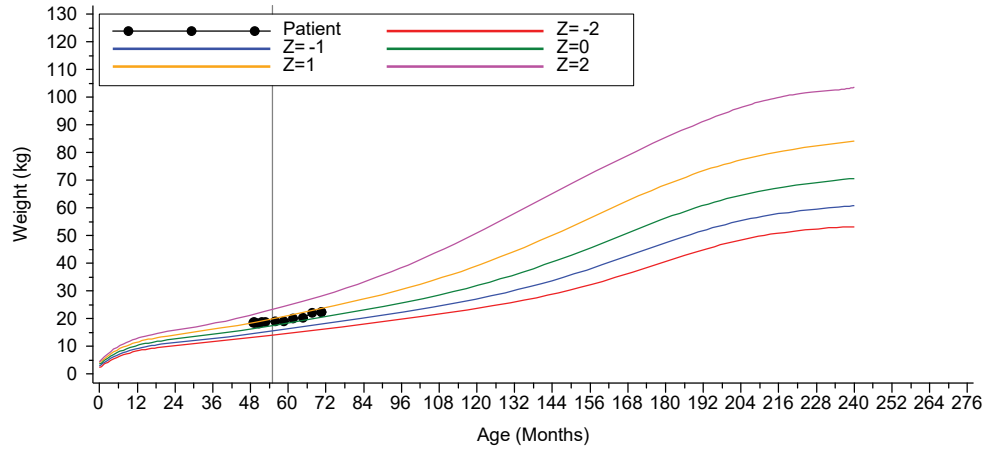

Patient 78  
Seizure History: Partial Onset Seizures

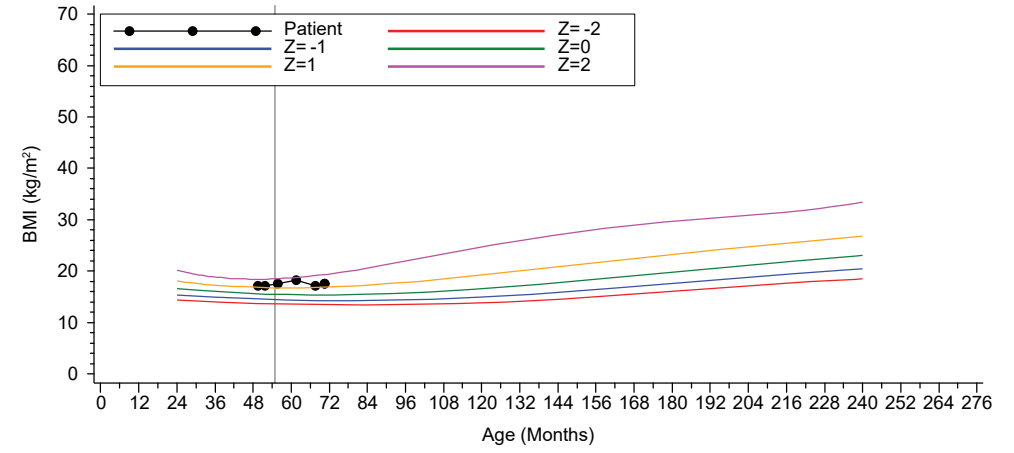



Patient 79  
Seizure History: Partial Onset Seizures

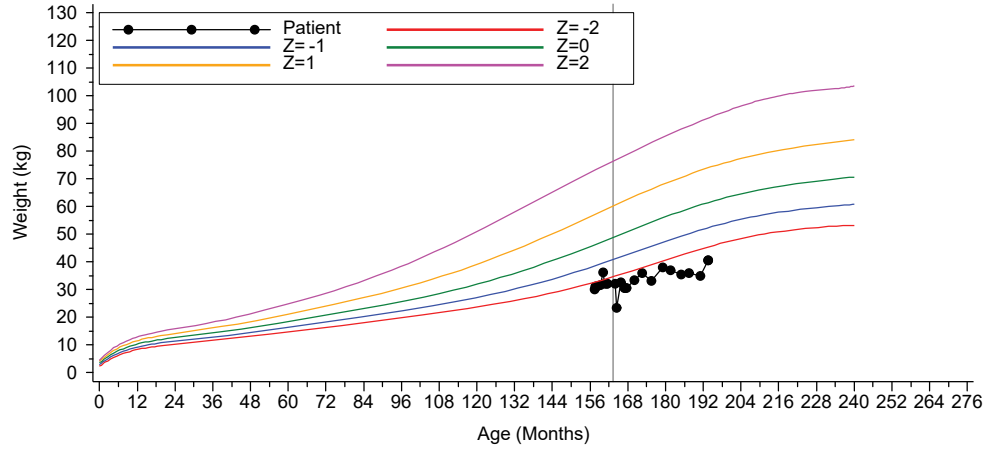

Patient 79  
Seizure History: Partial Onset Seizures

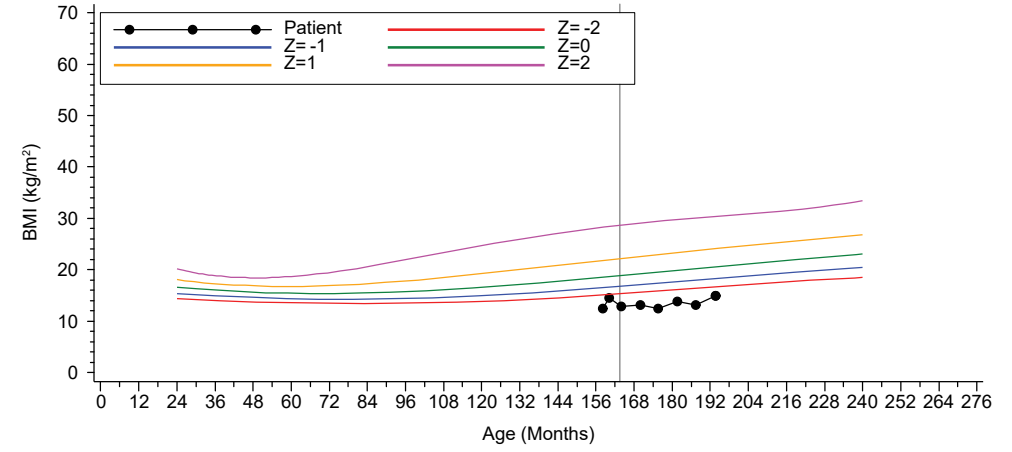

Patient 80  
Seizure History: Partial Onset Seizures

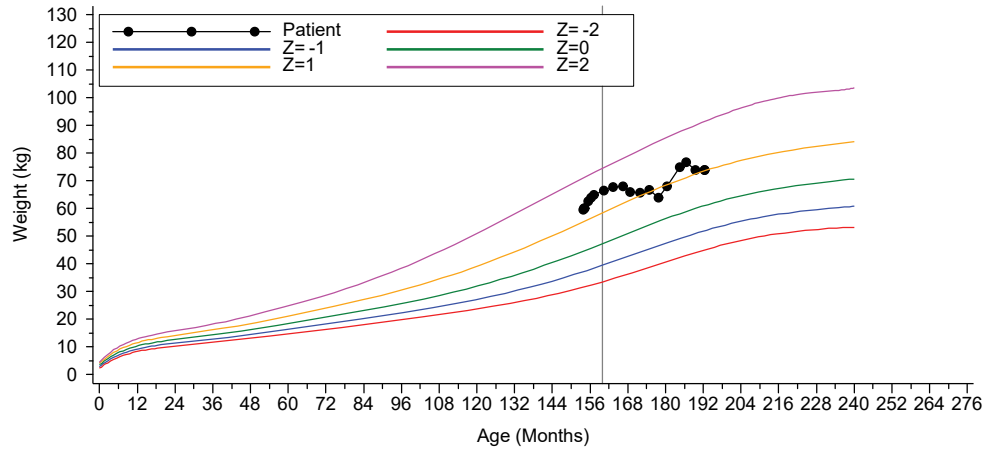

Patient 80  
Seizure History: Partial Onset Seizures

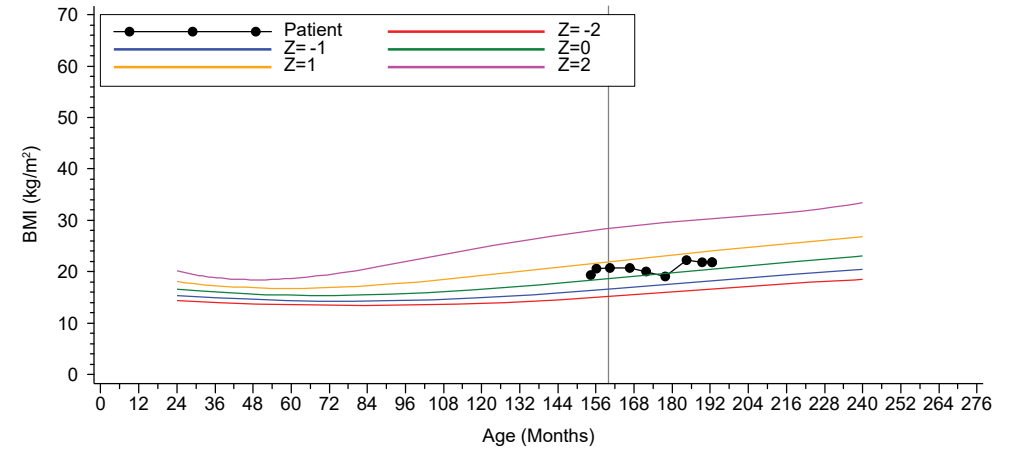

Patient 81  
Seizure History: Partial Onset Seizures

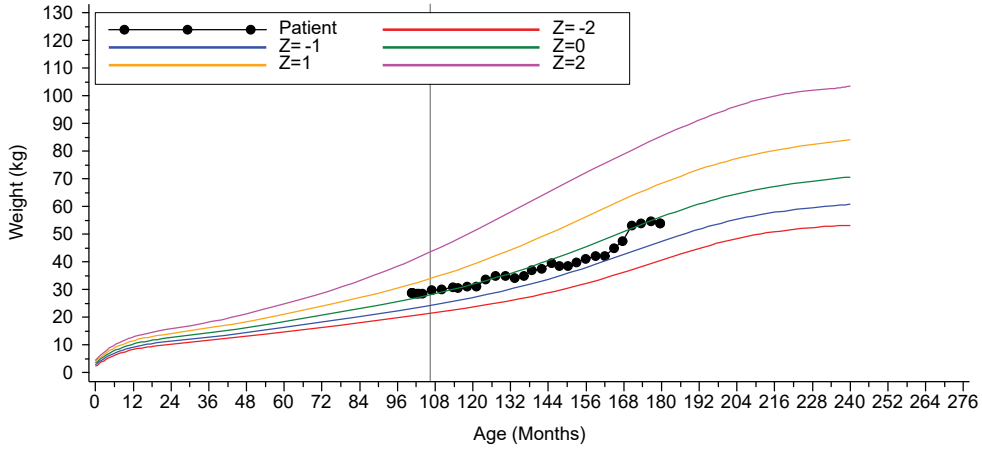

Patient 81  
Seizure History: Partial Onset Seizures

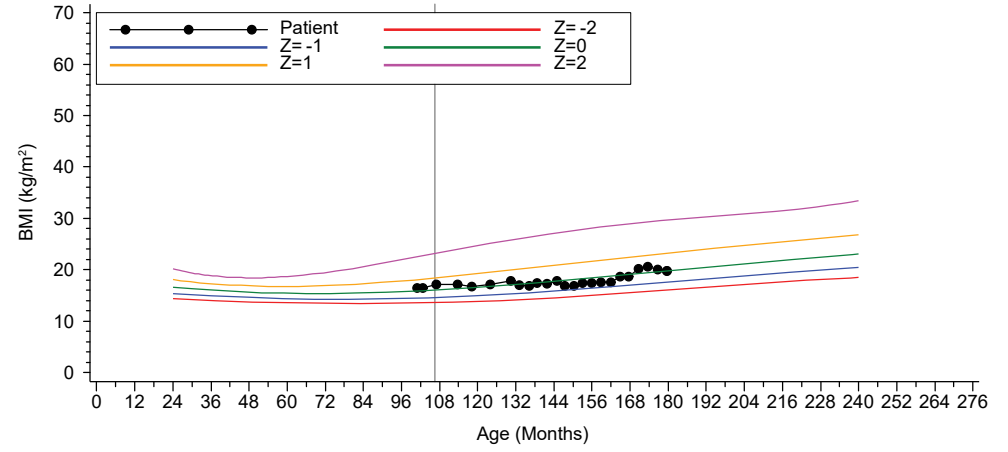

Patient 82  
Seizure History: Partial Onset Seizures

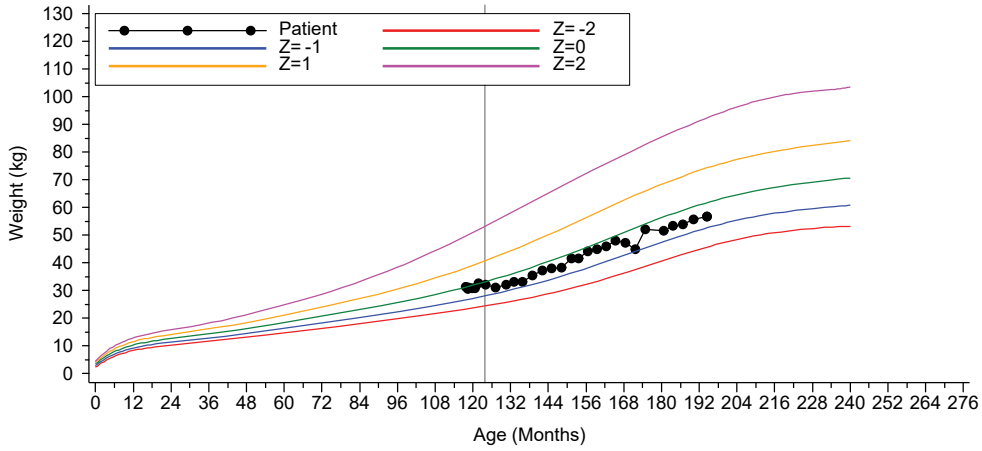

Patient 82  
Seizure History: Partial Onset Seizures

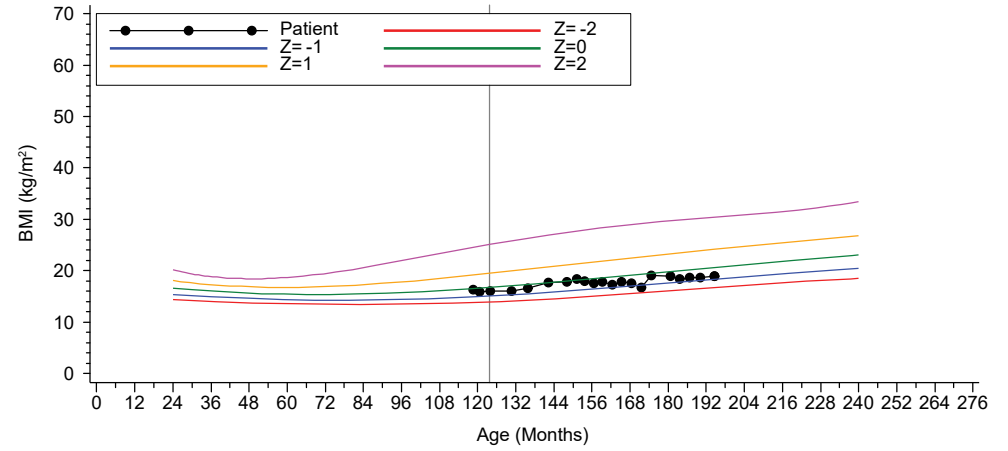

Patient 83  
Seizure History: Partial Onset Seizures

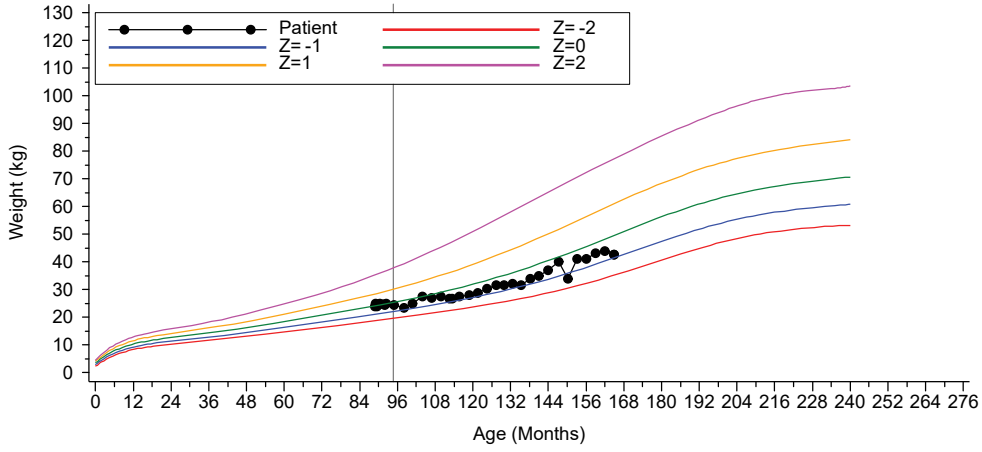

Patient 83  
Seizure History: Partial Onset Seizures

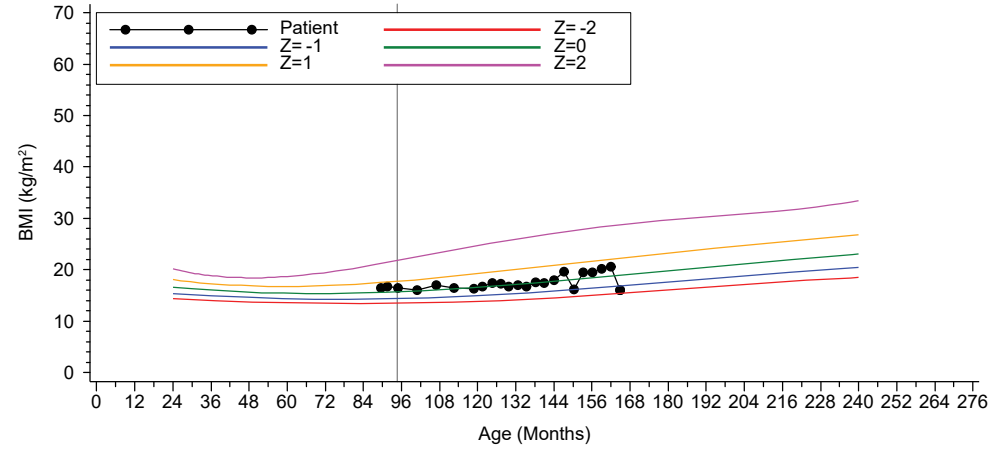

Patient 84  
Seizure History: Partial Onset Seizures

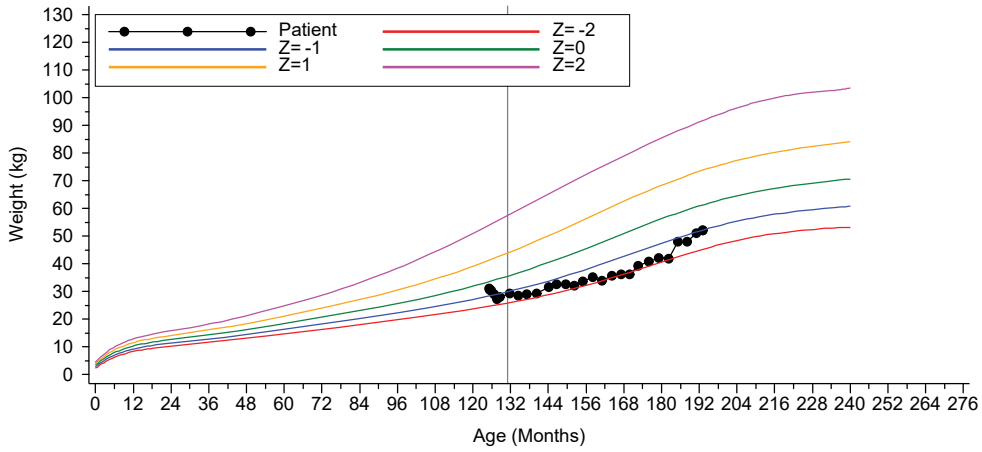

Patient 84  
Seizure History: Partial Onset Seizures

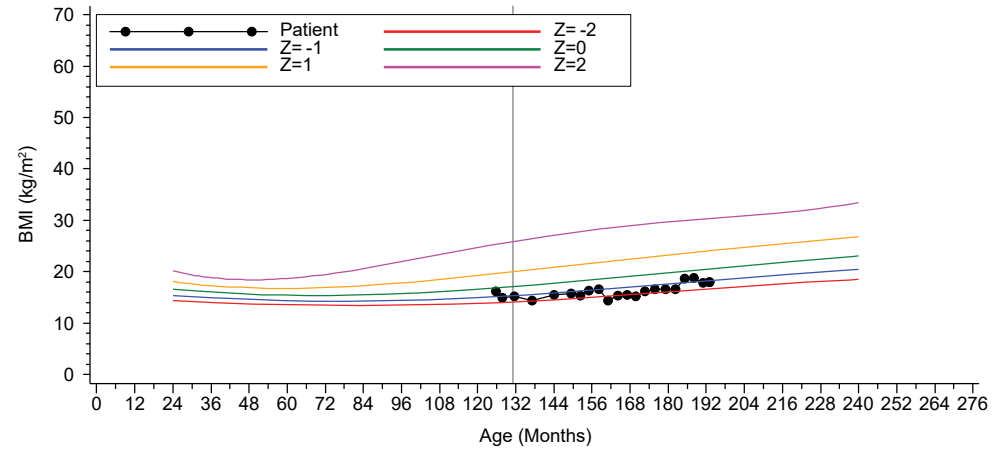

Patient 85  
Seizure History: Partial Onset Seizures

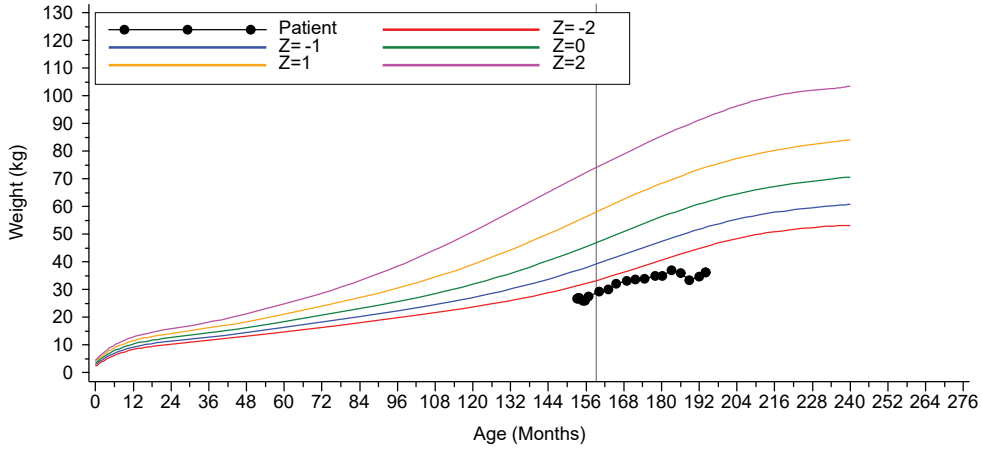

Patient 85  
Seizure History: Partial Onset Seizures

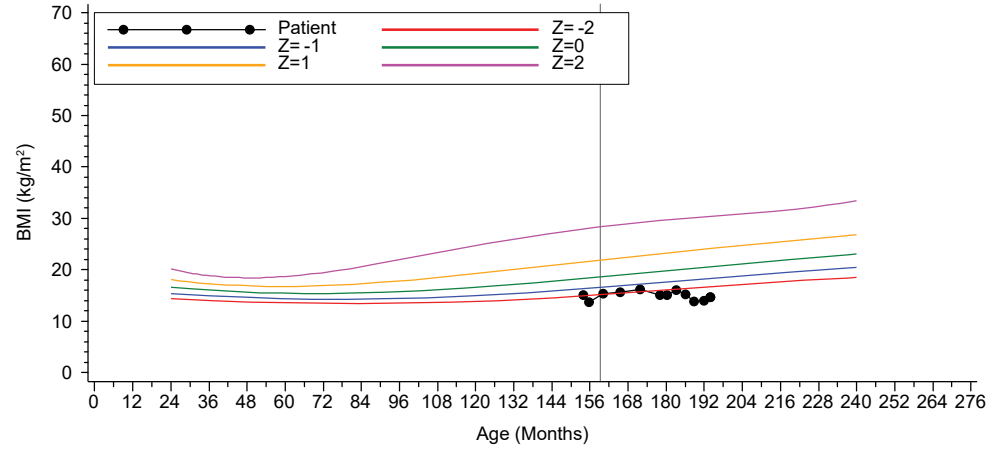

Patient 86  
Seizure History: Partial Onset Seizures

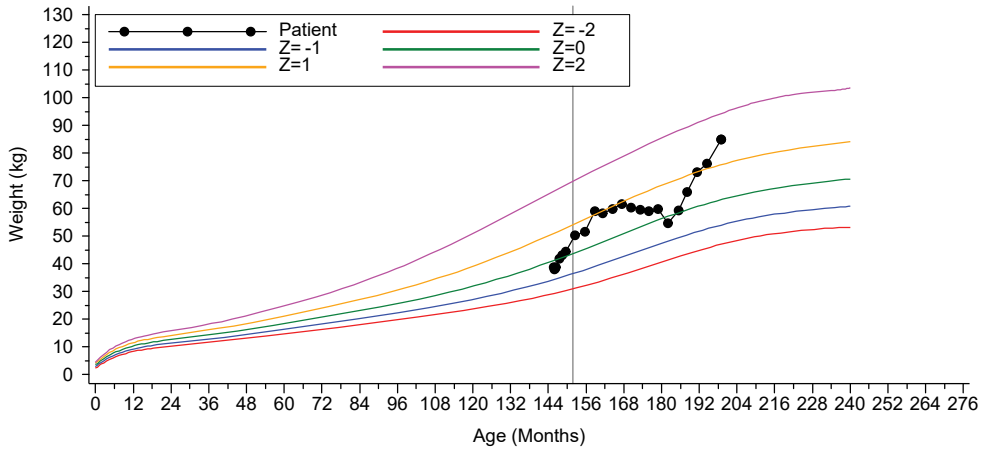

Patient 86  
Seizure History: Partial Onset Seizures

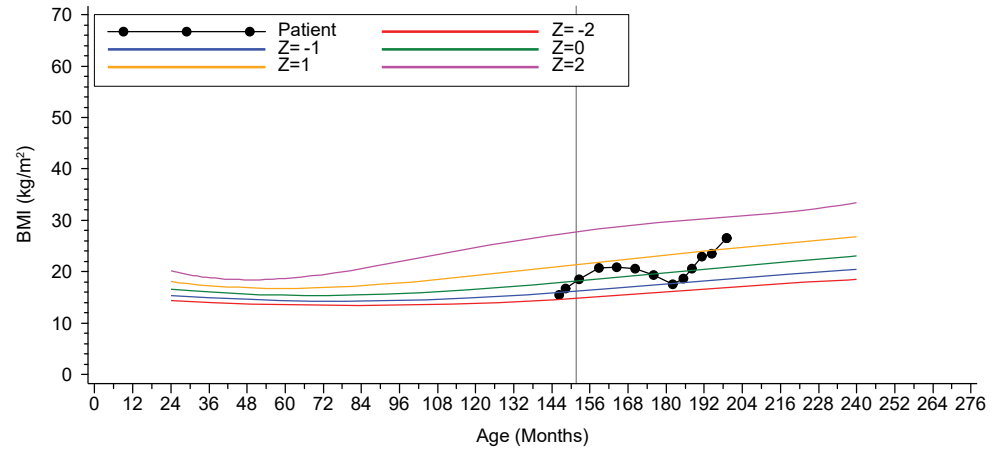

Patient 87  
Seizure History: Partial Onset Seizures

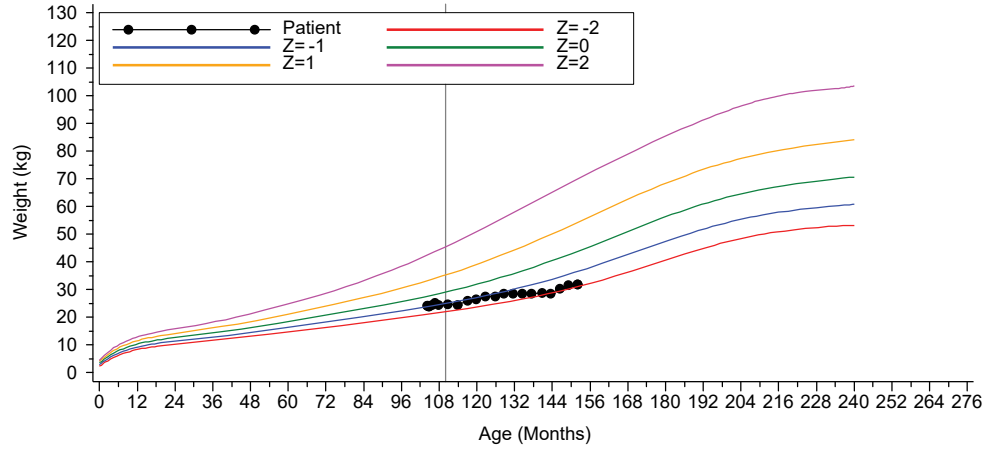

Patient 87  
Seizure History: Partial Onset Seizures

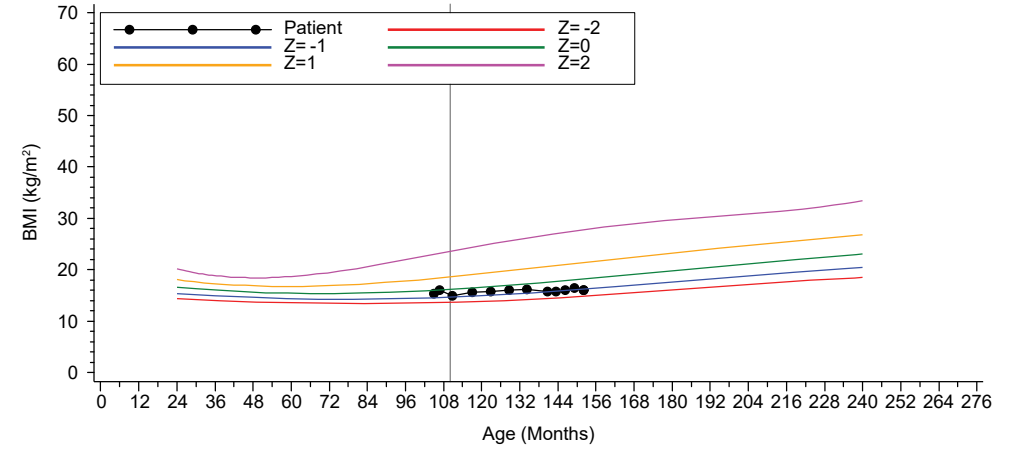

Patient 88  
Seizure History: Partial Onset Seizures

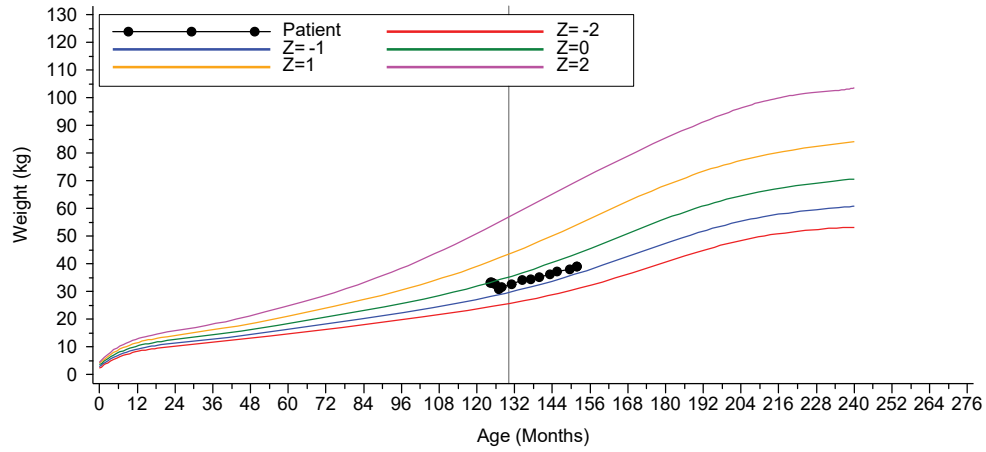

Patient 88  
Seizure History: Partial Onset Seizures

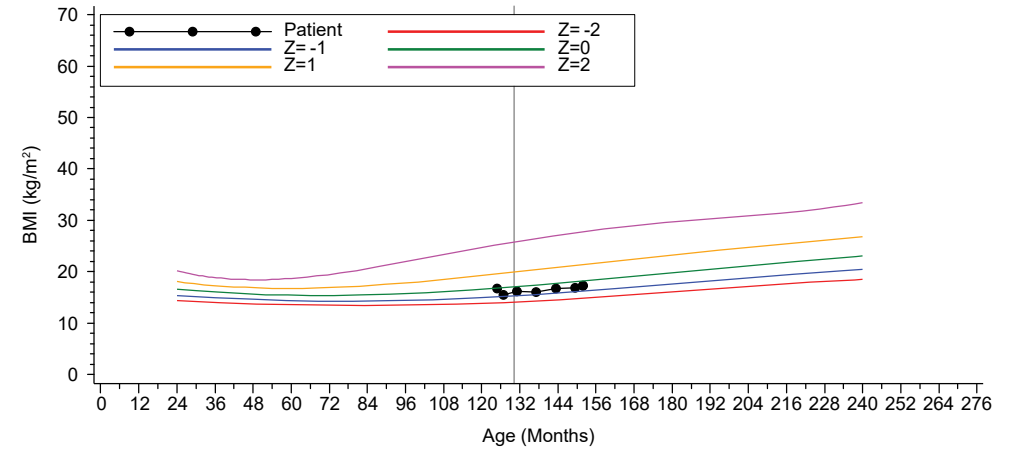

Patient 89  
Seizure History: Partial Onset Seizures

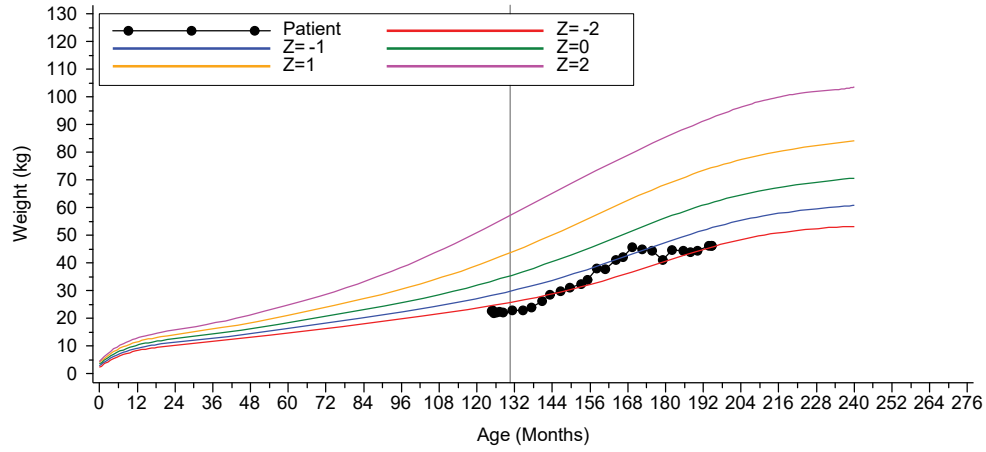

Patient 89  
Seizure History: Partial Onset Seizures

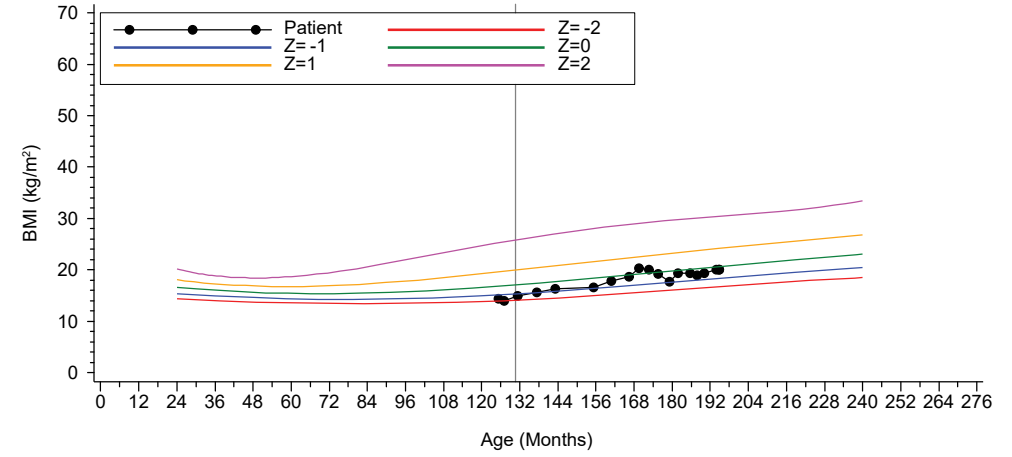

Patient 90  
Seizure History: Partial Onset Seizures

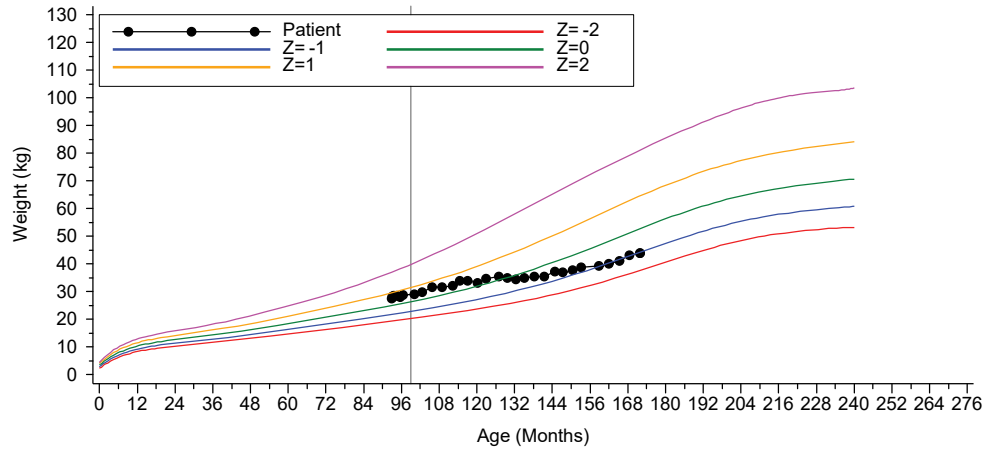

Patient 90  
Seizure History: Partial Onset Seizures

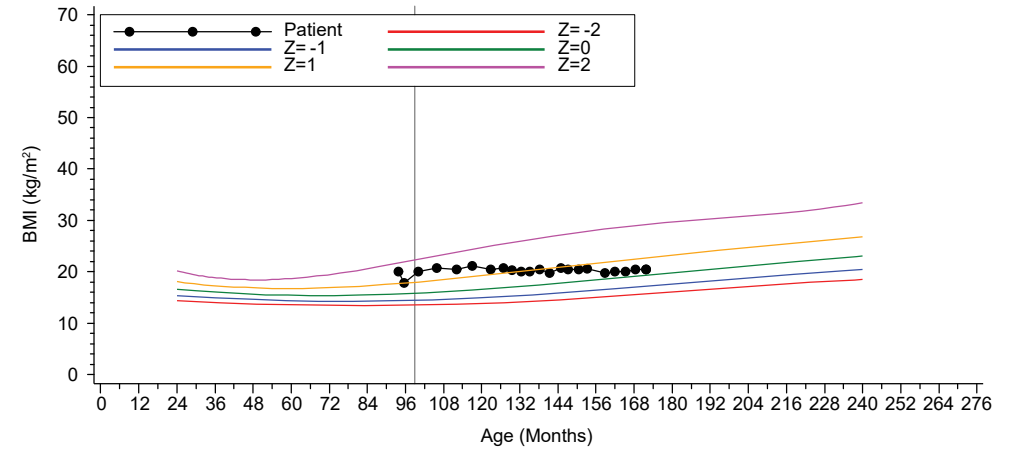

Patient 91

Seizure History: Primary Generalized Seizures and Unknown

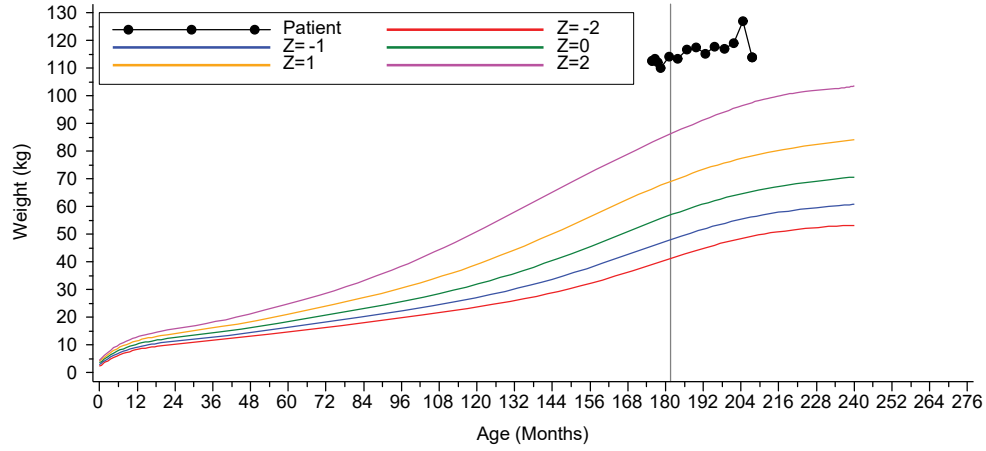

Patient 91

Seizure History: Primary Generalized Seizures and Unknown

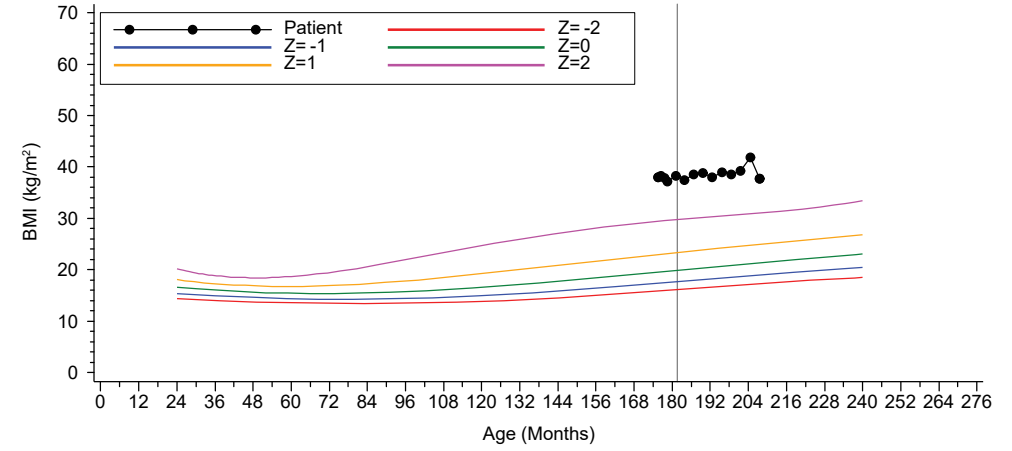

Patient 92

Seizure History: Primary Generalized Seizures and Unknown

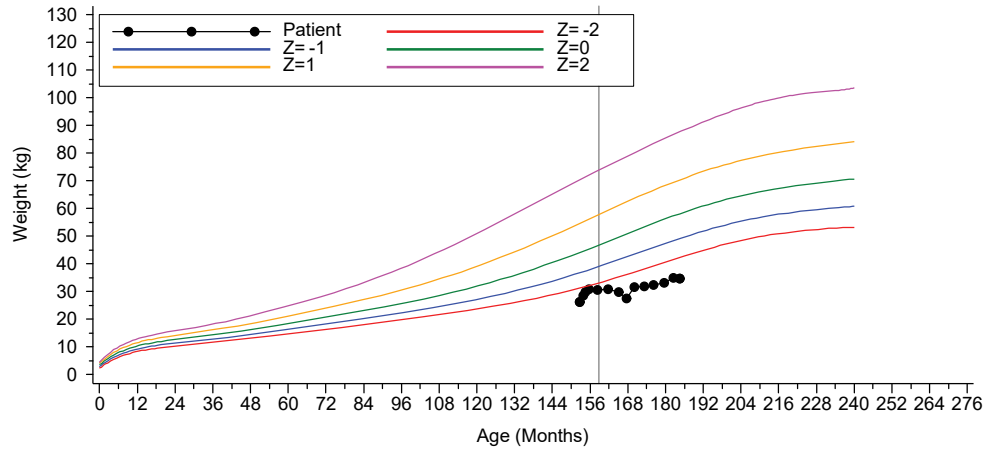

Patient 92

Seizure History: Primary Generalized Seizures and Unknown

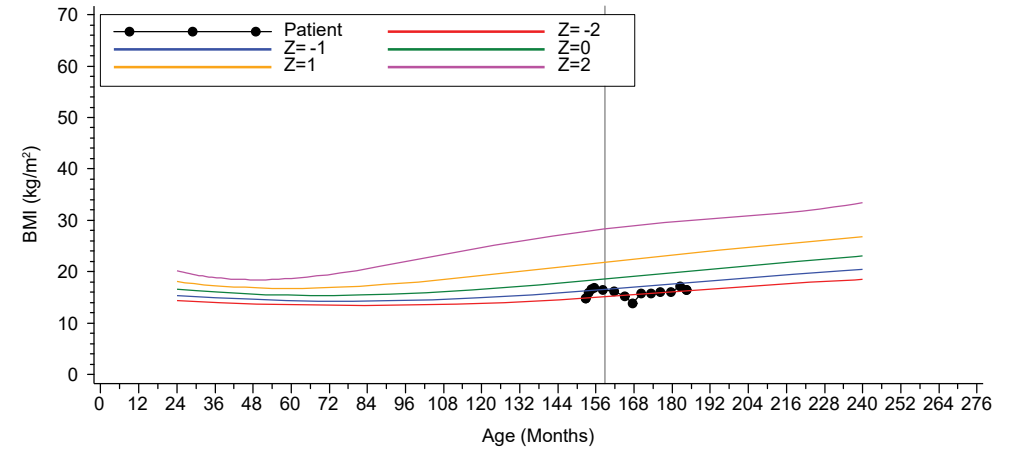

Patient 93

Seizure History: Primary Generalized Seizures and Unknown

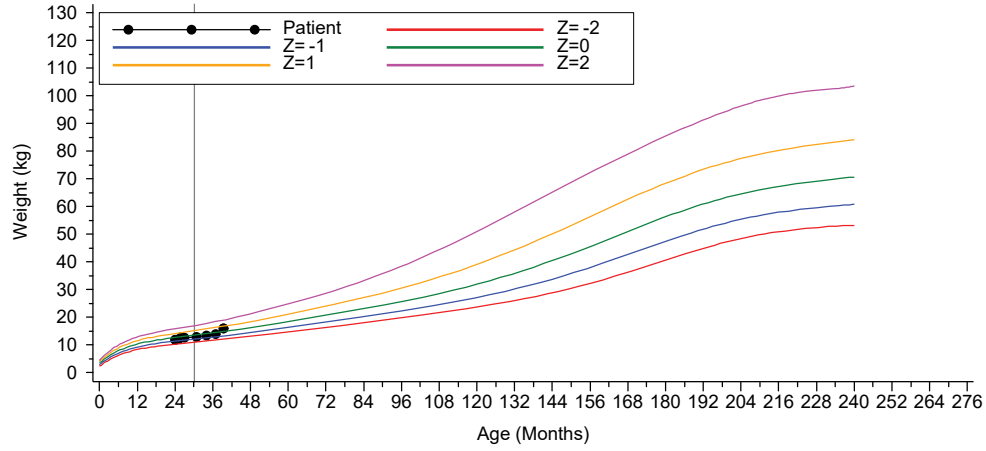

Patient 93

Seizure History: Primary Generalized Seizures and Unknown

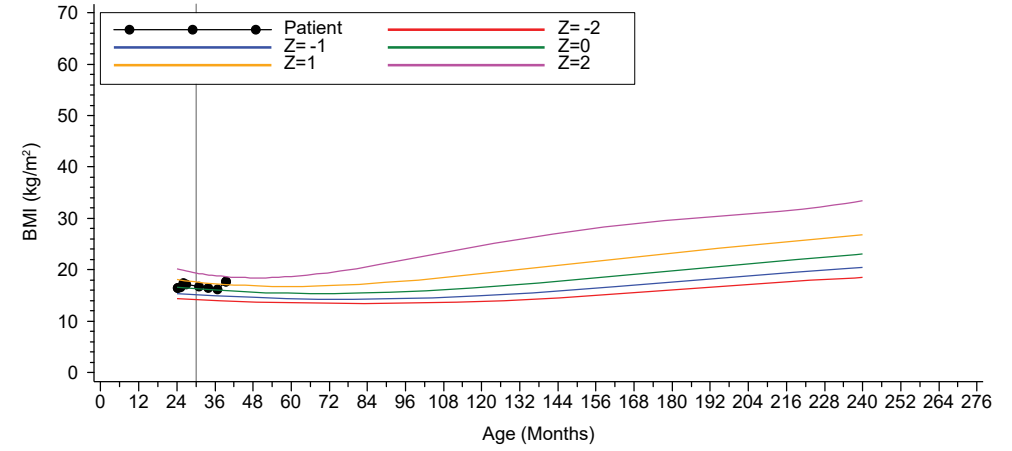

Patient 94

Seizure History: Primary Generalized Seizures and Unknown

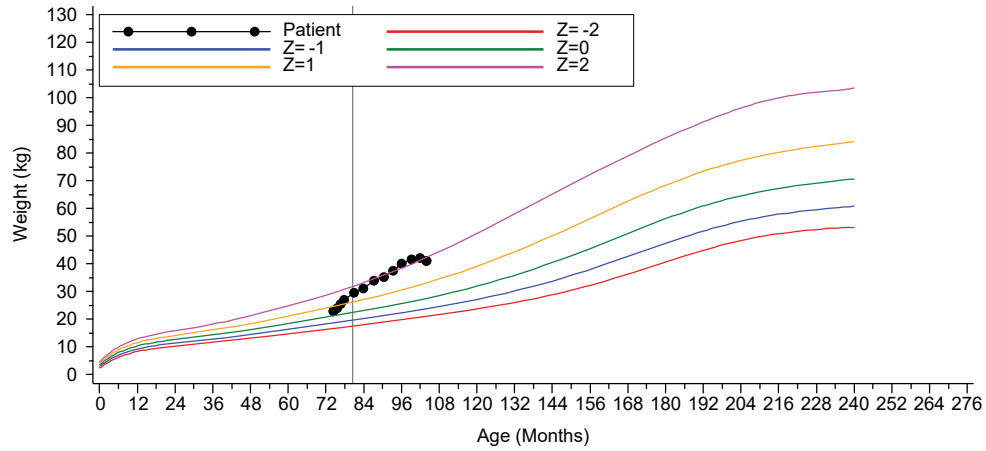

Patient 94

Seizure History: Primary Generalized Seizures and Unknown

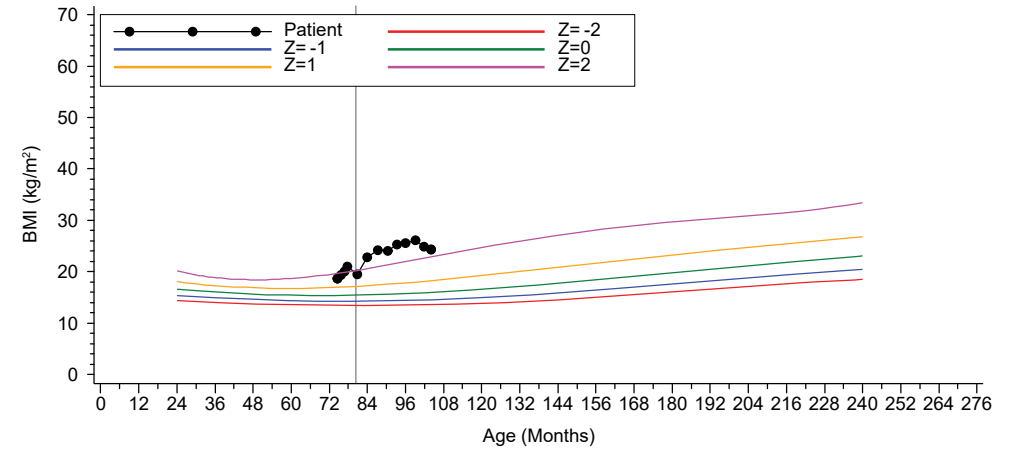



Patient 95

Seizure History: Primary Generalized Seizures and Unknown

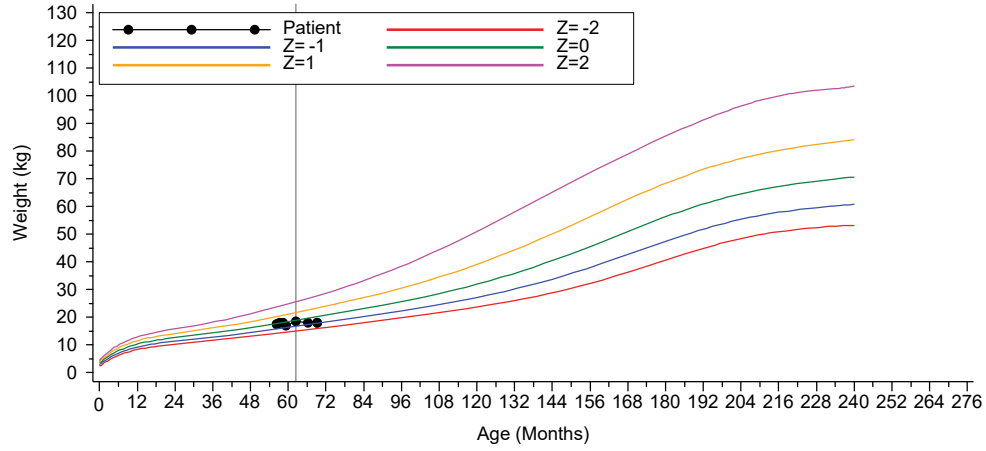

Patient 95

Seizure History: Primary Generalized Seizures and Unknown

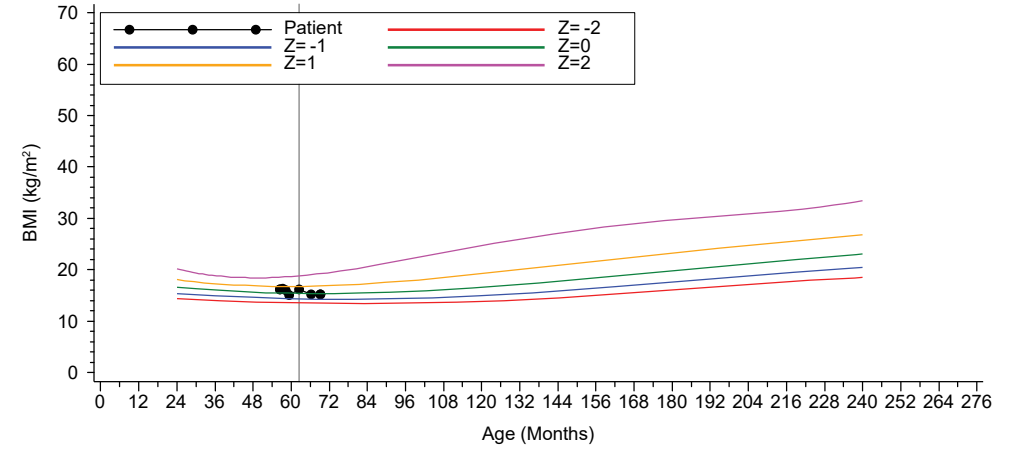

Patient 96

Seizure History: Primary Generalized Seizures and Unknown

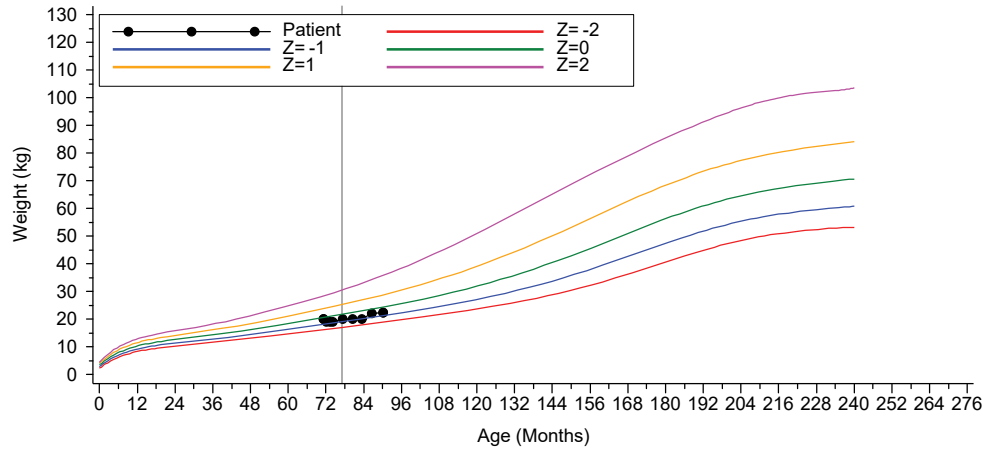

Patient 96

Seizure History: Primary Generalized Seizures and Unknown

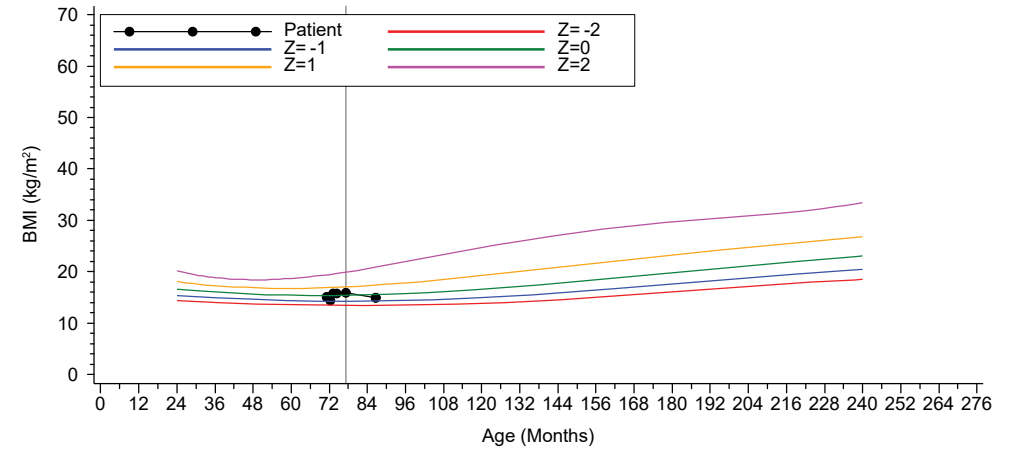

Patient 97

Seizure History: Primary Generalized Seizures and Unknown

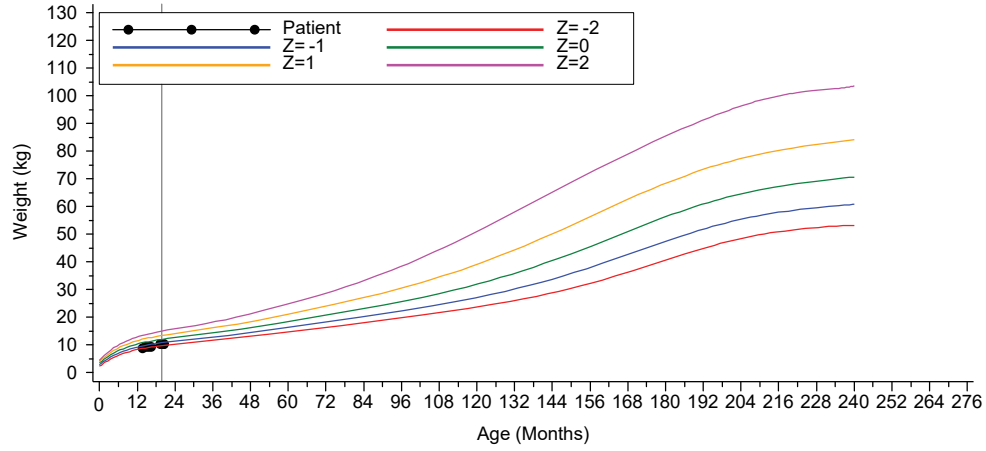

Patient 97

Seizure History: Primary Generalized Seizures and Unknown

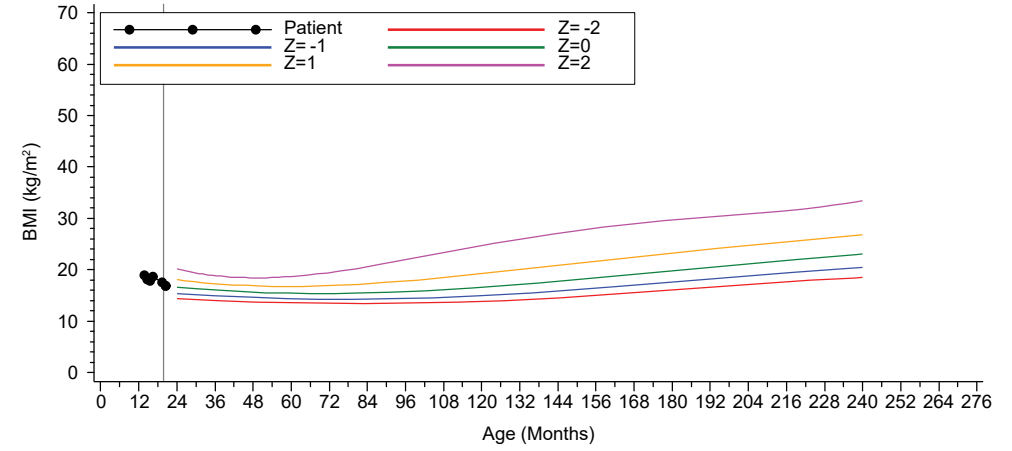

Patient 98

Seizure History: Primary Generalized Seizures and Unknown

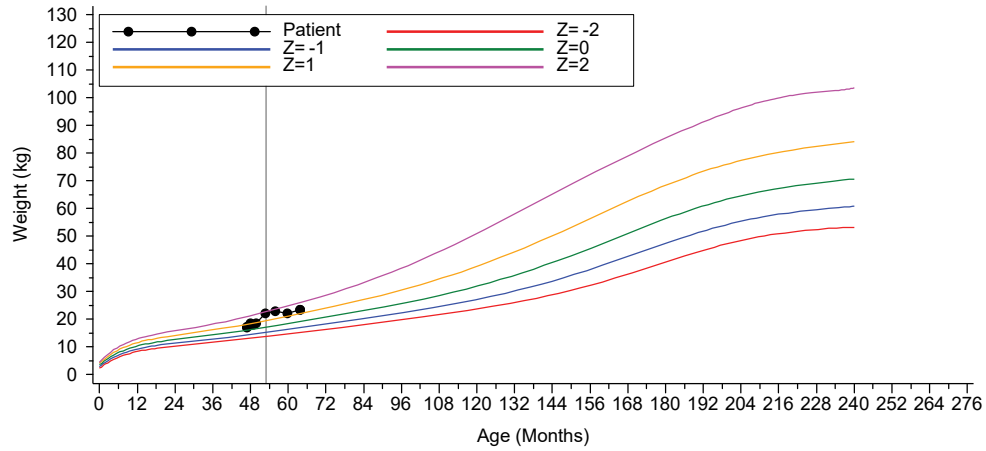

Patient 98

Seizure History: Primary Generalized Seizures and Unknown

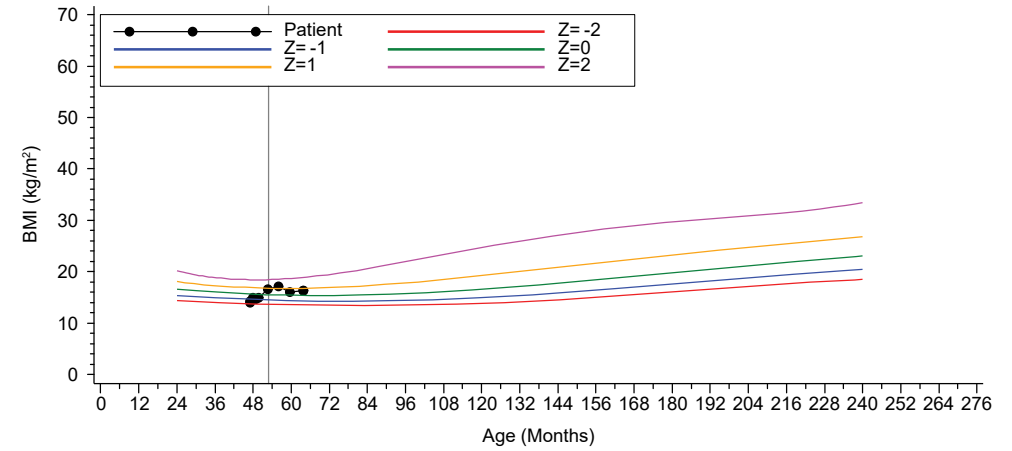

Patient 99

Seizure History: Primary Generalized Seizures and Unknown

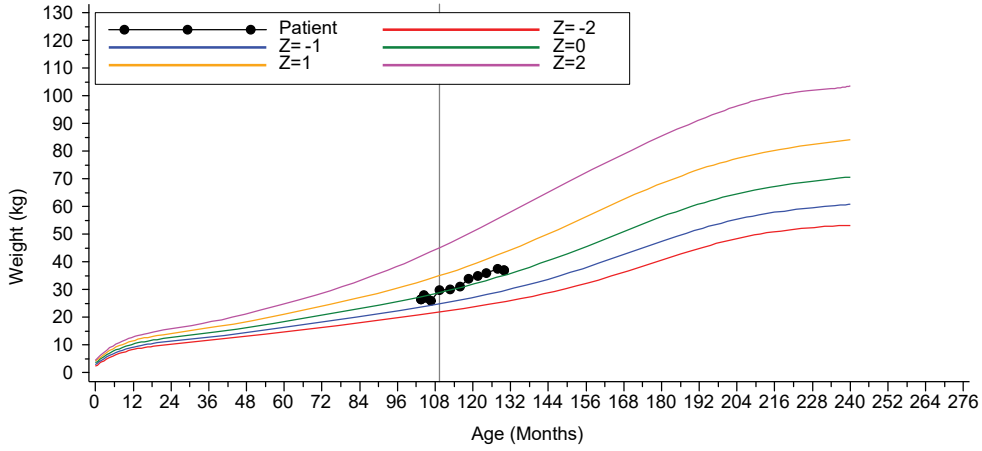

Patient 99

Seizure History: Primary Generalized Seizures and Unknown

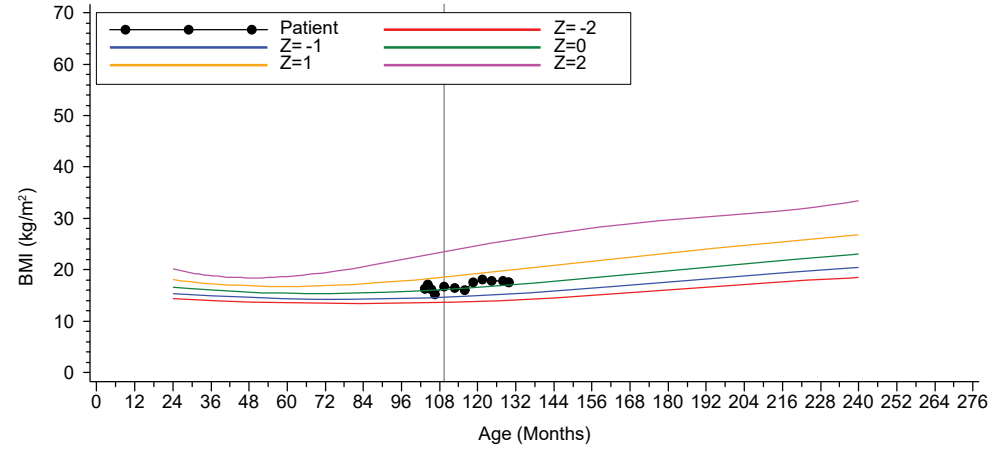

Patient 100

Seizure History: Primary Generalized Seizures and Unknown

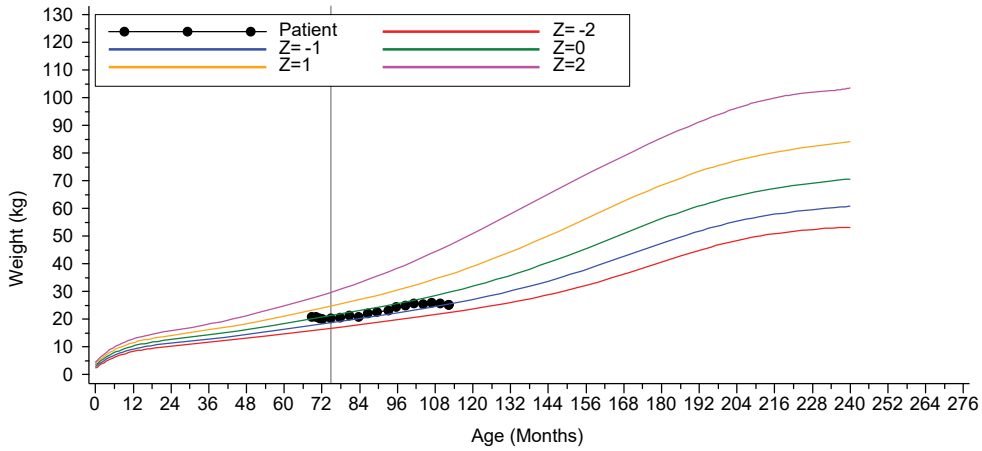

Patient 100

Seizure History: Primary Generalized Seizures and Unknown

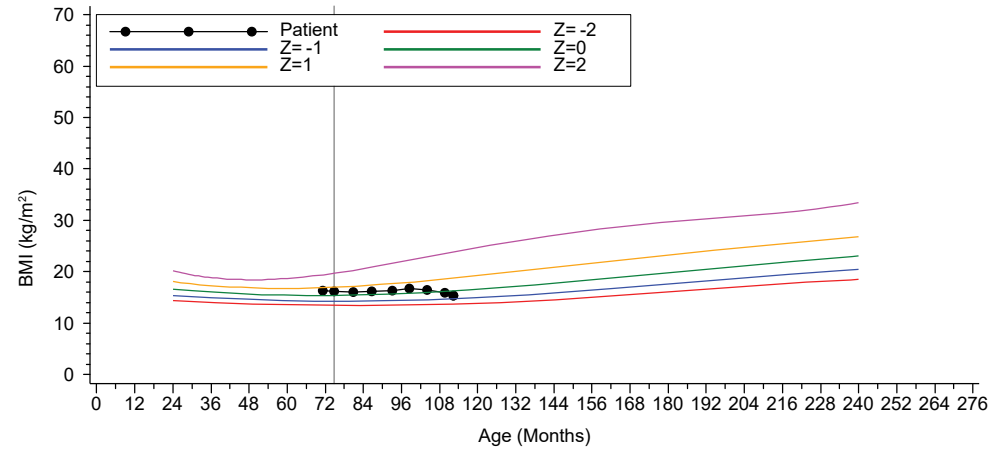

Patient 101

Seizure History: Primary Generalized Seizures and Unknown

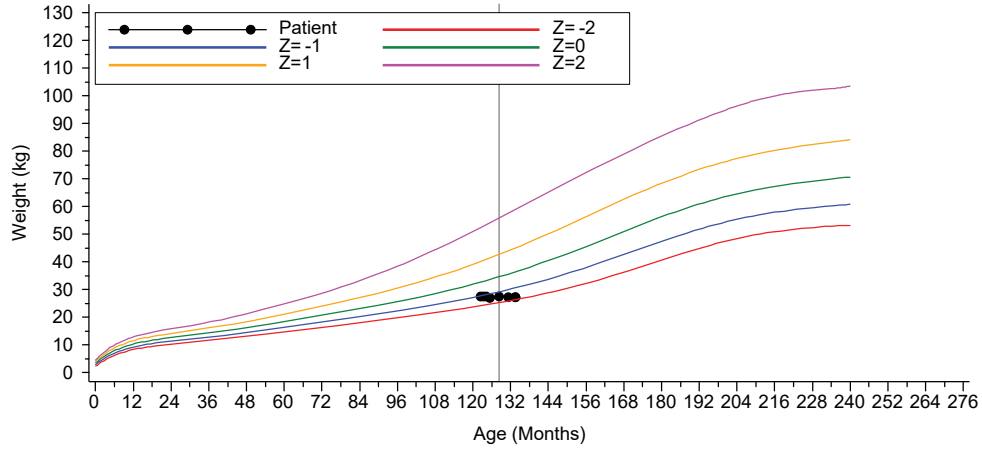

Patient 101

Seizure History: Primary Generalized Seizures and Unknown

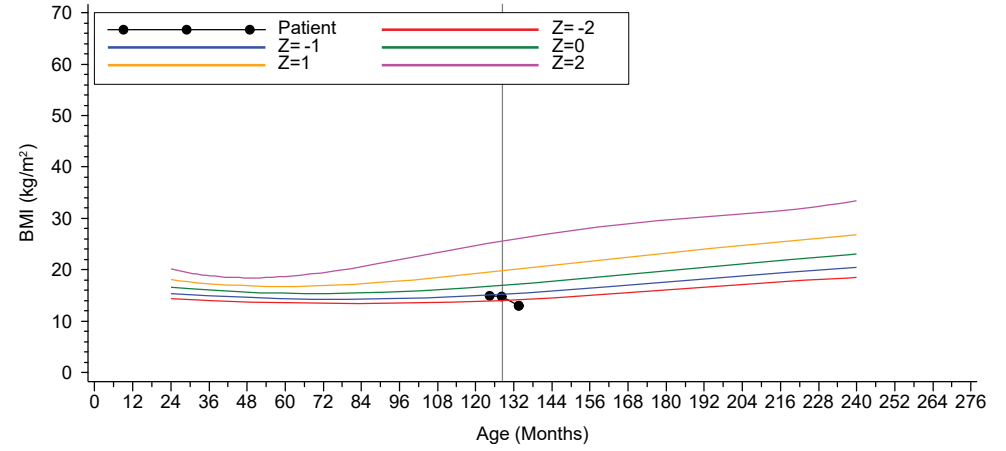

Patient 102

Seizure History: Primary Generalized Seizures and Unknown

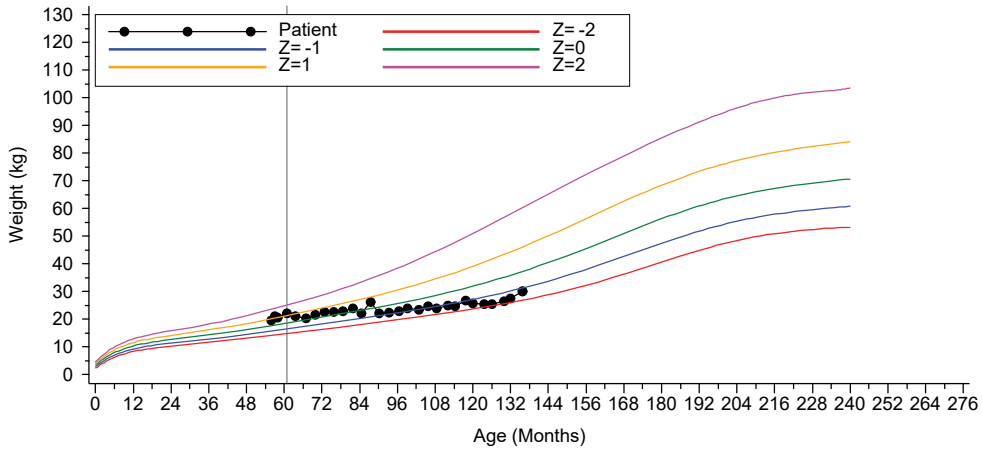

Patient 102

Seizure History: Primary Generalized Seizures and Unknown

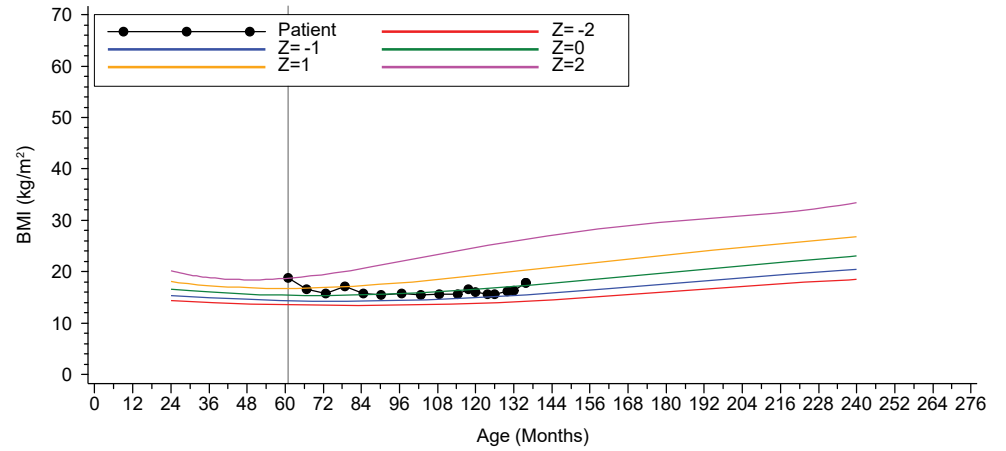

Patient 103  
Seizure History: Primary Generalized Seizures and Unknown

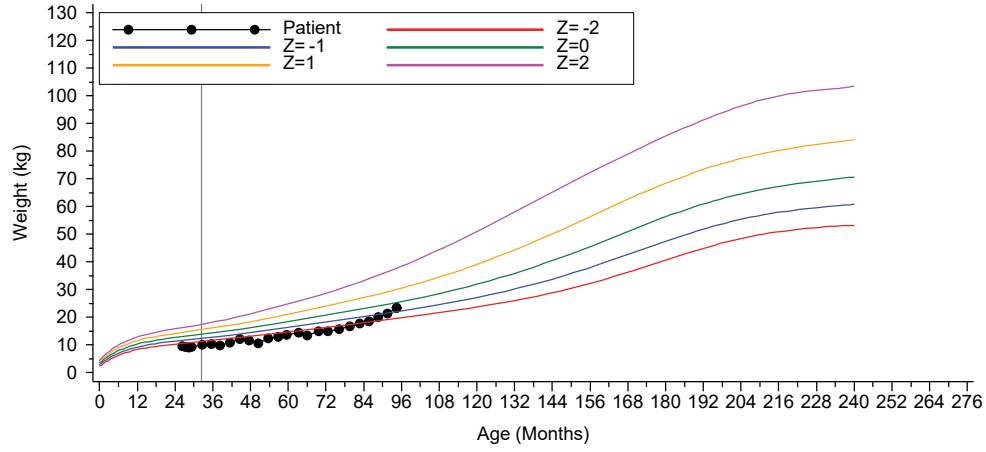

Patient 103  
Seizure History: Primary Generalized Seizures and Unknown

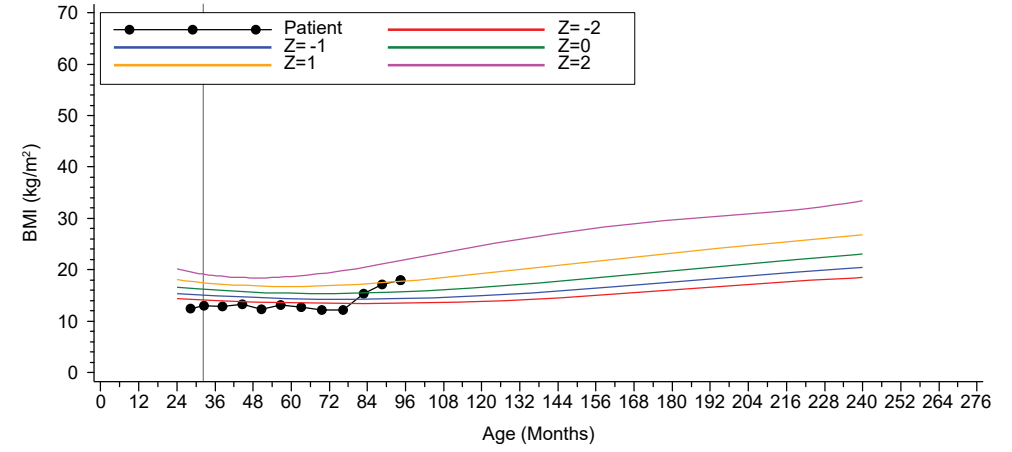

Patient 104  
Seizure History: Primary Generalized Seizures and Unknown

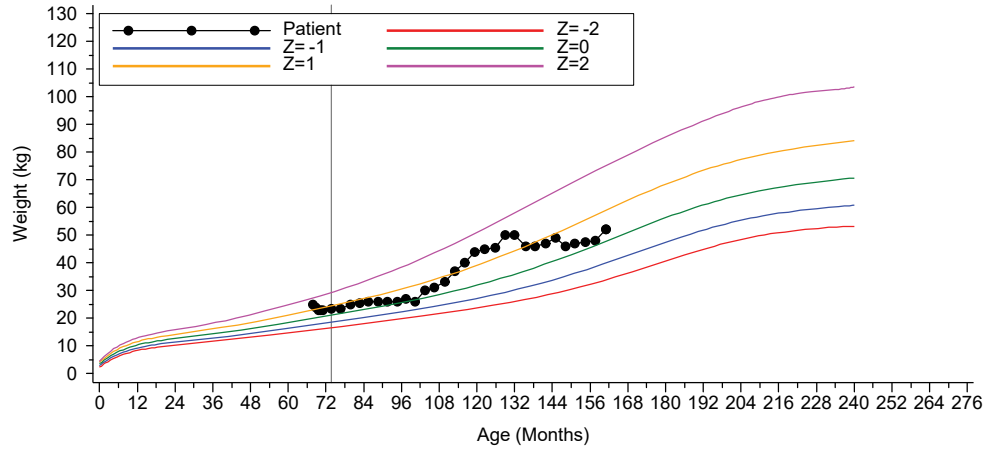

Patient 104  
Seizure History: Primary Generalized Seizures and Unknown

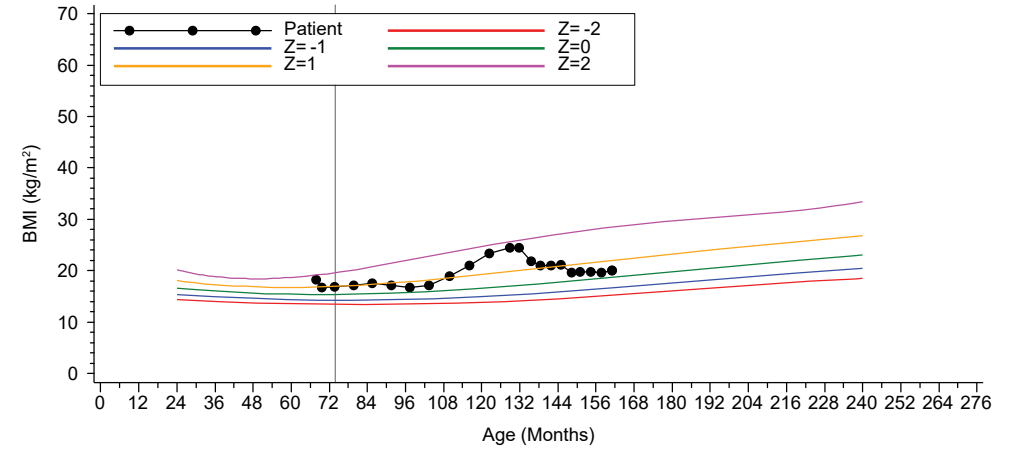

Patient 105

Seizure History: Primary Generalized Seizures and Unknown

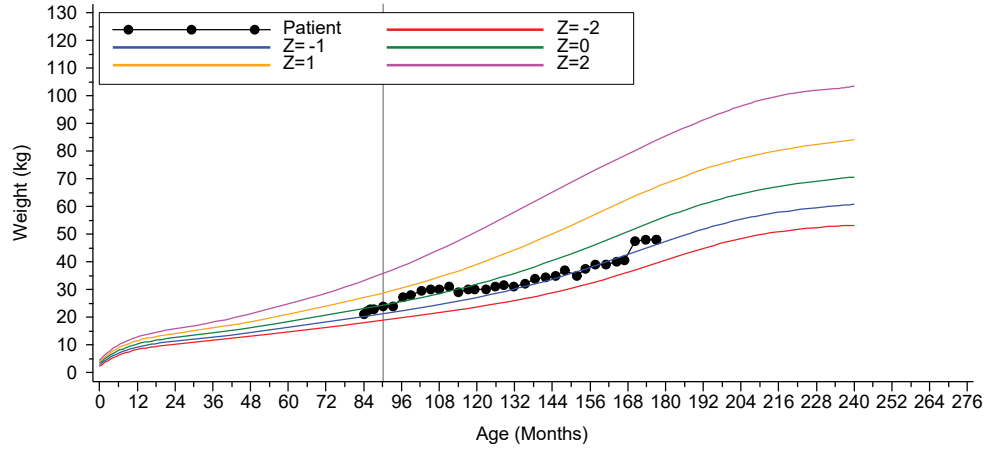

Patient 105

Seizure History: Primary Generalized Seizures and Unknown

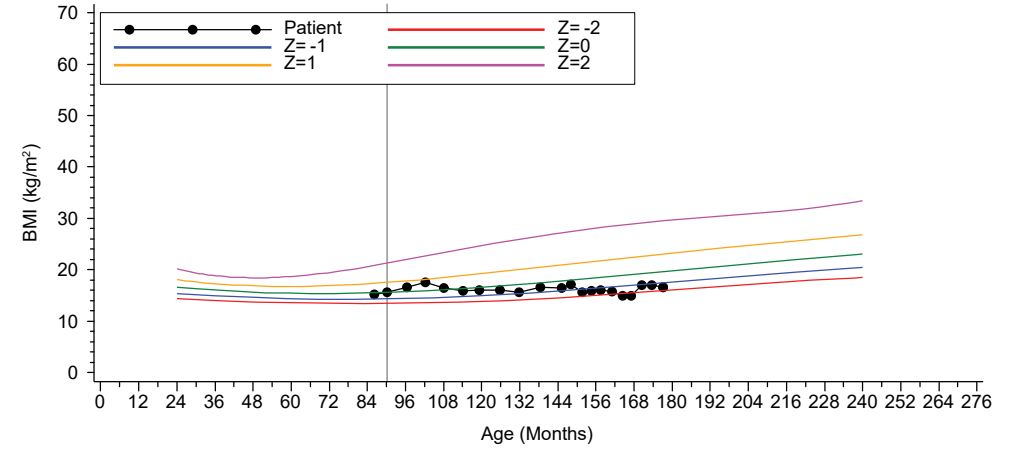

Patient 106

Seizure History: Primary Generalized Seizures and Unknown

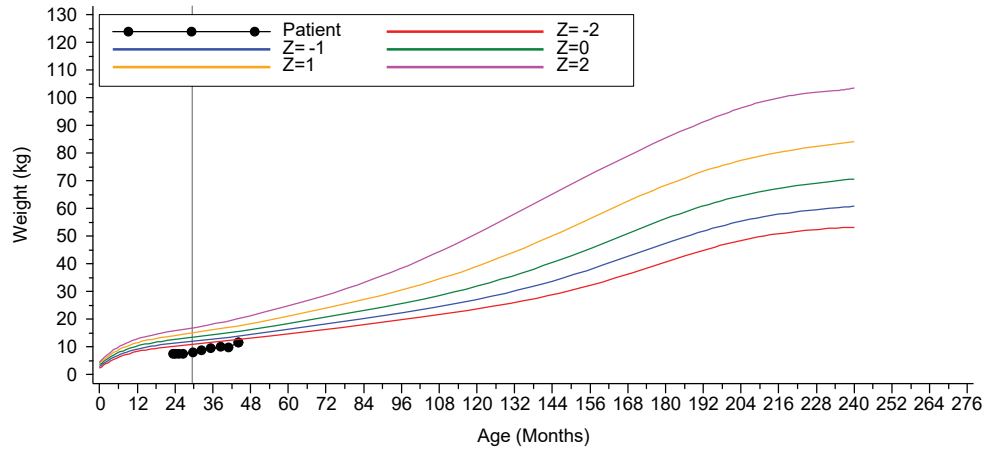

Patient 106

Seizure History: Primary Generalized Seizures and Unknown

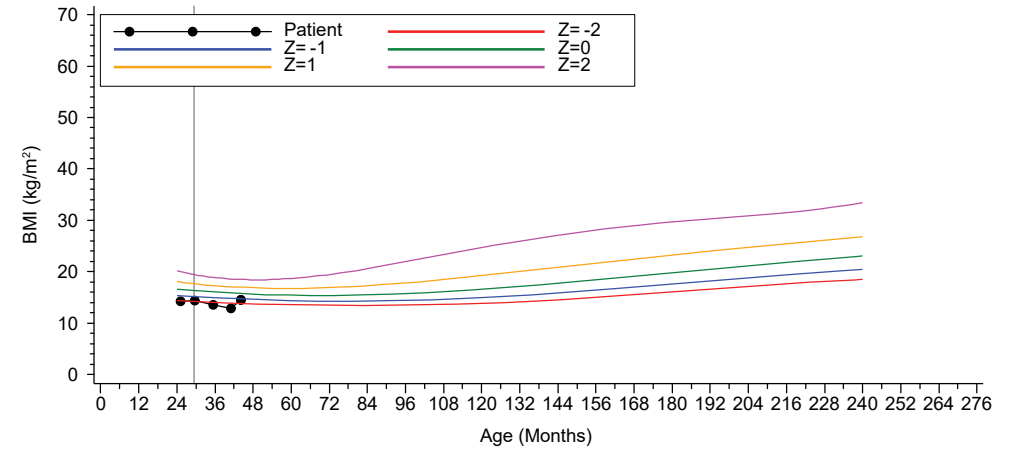

Patient 107  
Seizure History: Primary Generalized Seizures and Unknown

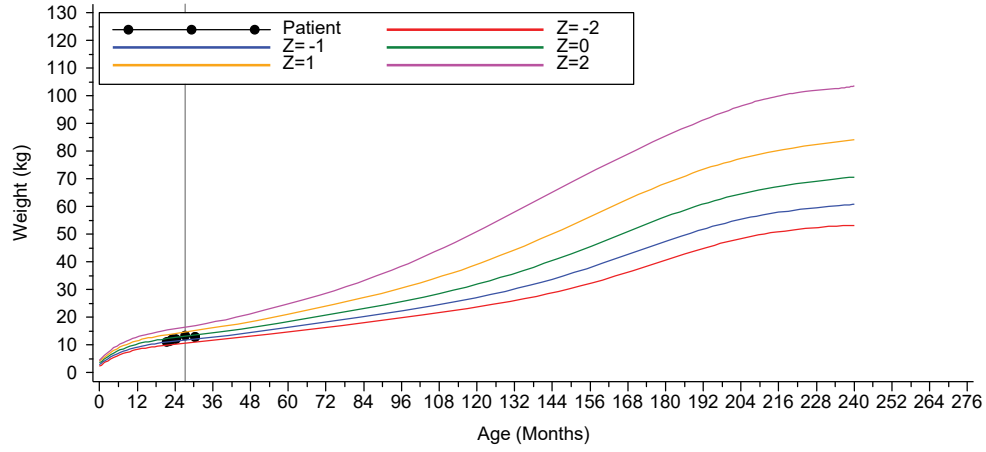

Patient 107  
Seizure History: Primary Generalized Seizures and Unknown

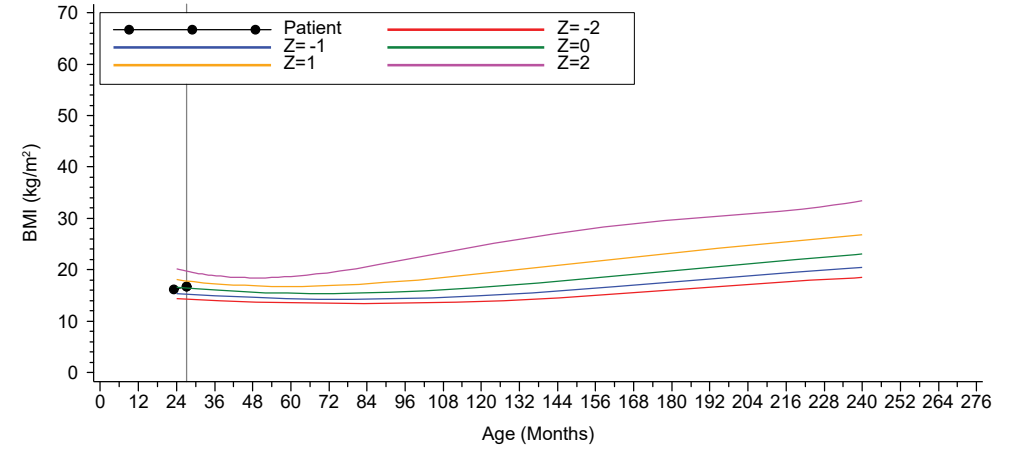

Patient 108  
Seizure History: Primary Generalized Seizures and Unknown

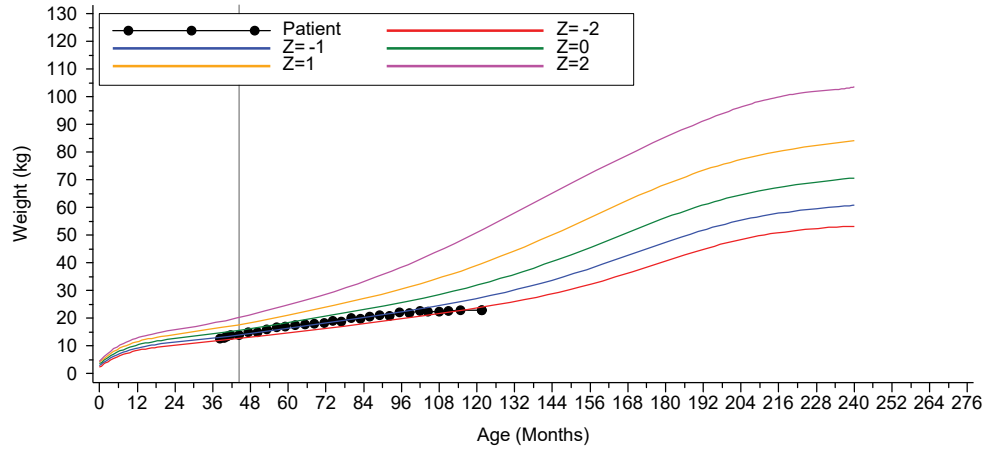

Patient 108  
Seizure History: Primary Generalized Seizures and Unknown

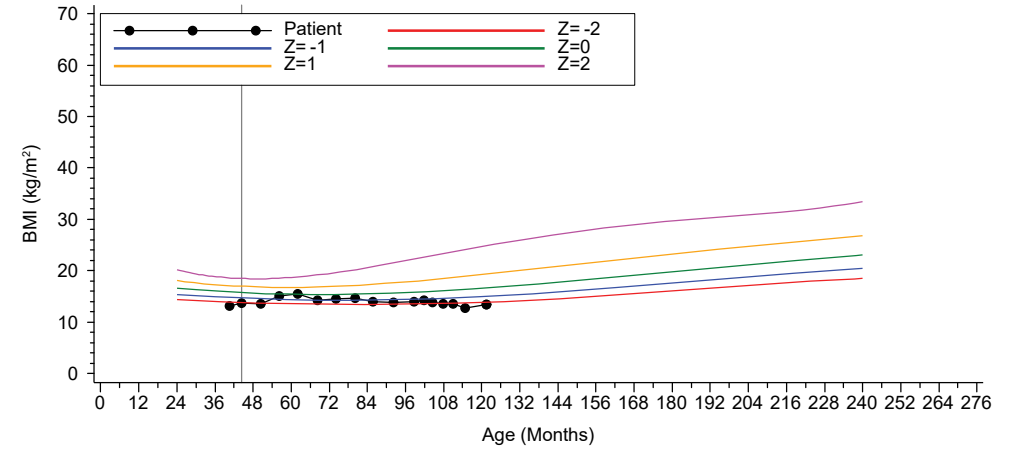

Patient 109  
Seizure History: Primary Generalized Seizures and Unknown

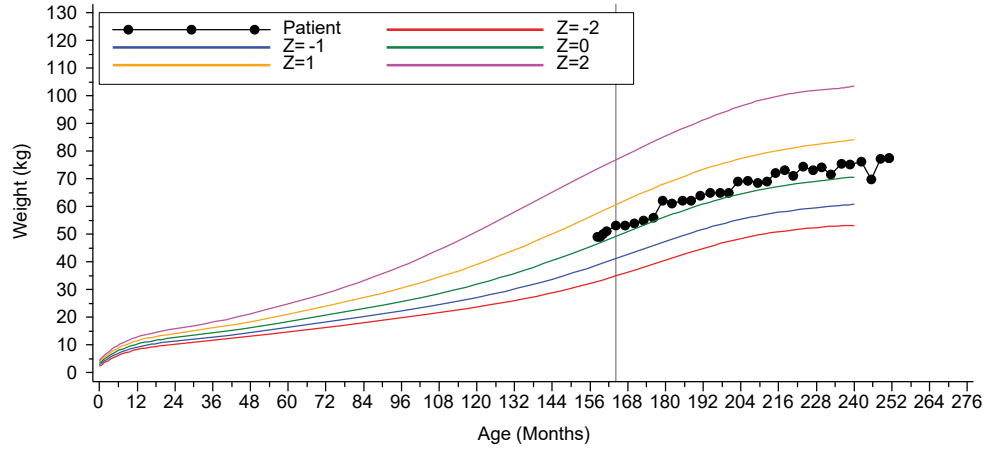

Patient 109  
Seizure History: Primary Generalized Seizures and Unknown

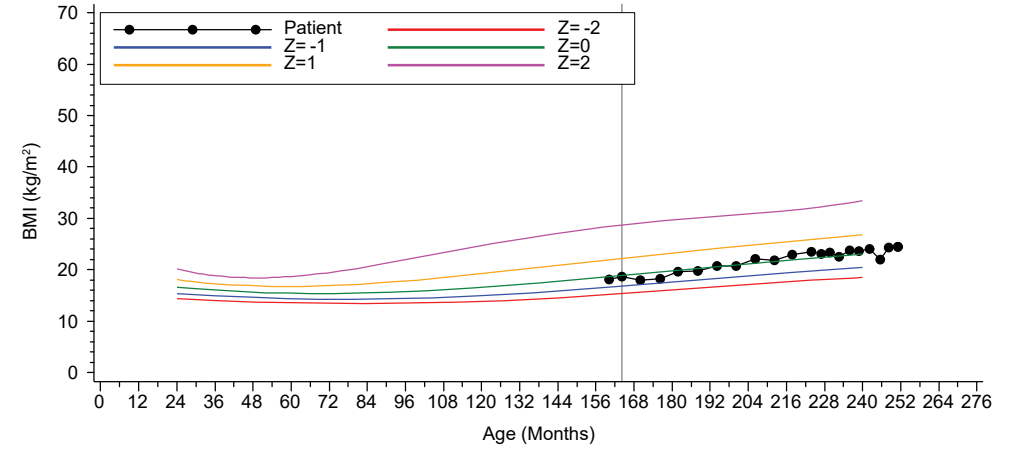

Patient 110  
Seizure History: Primary Generalized Seizures and Unknown

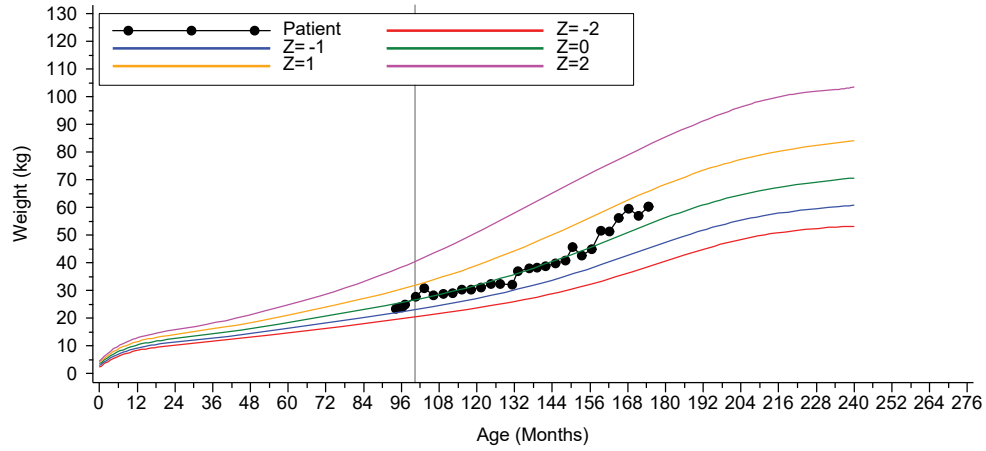

Patient 110  
Seizure History: Primary Generalized Seizures and Unknown

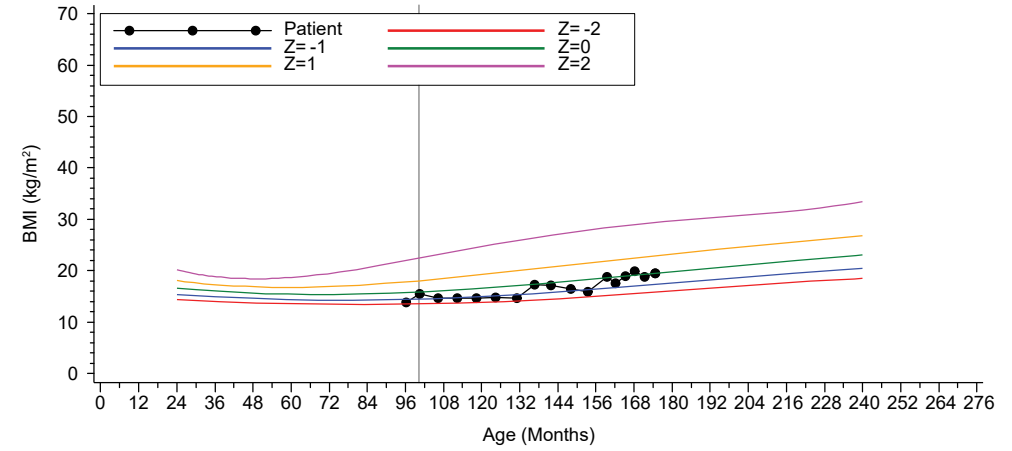



Patient 111  
Seizure History: Primary Generalized Seizures and Unknown

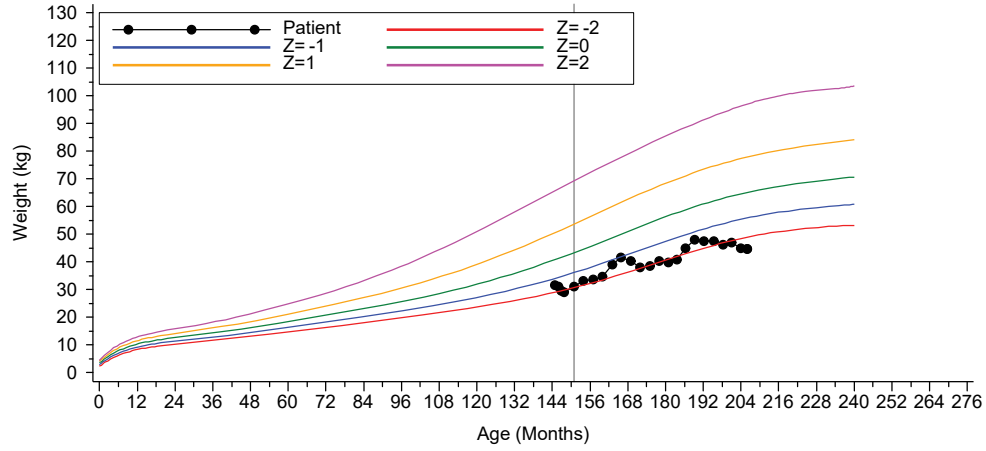

Patient 111  
Seizure History: Primary Generalized Seizures and Unknown

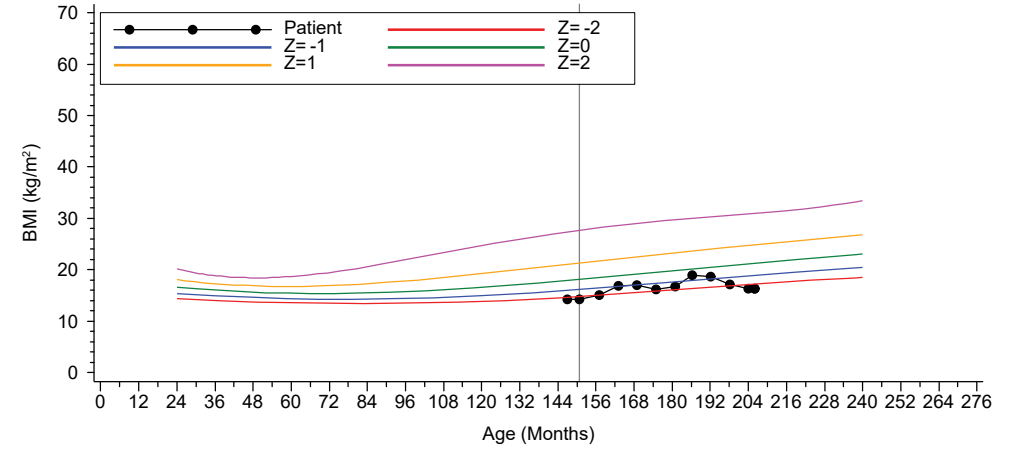

Patient 112  
Seizure History: Primary Generalized Seizures and Unknown

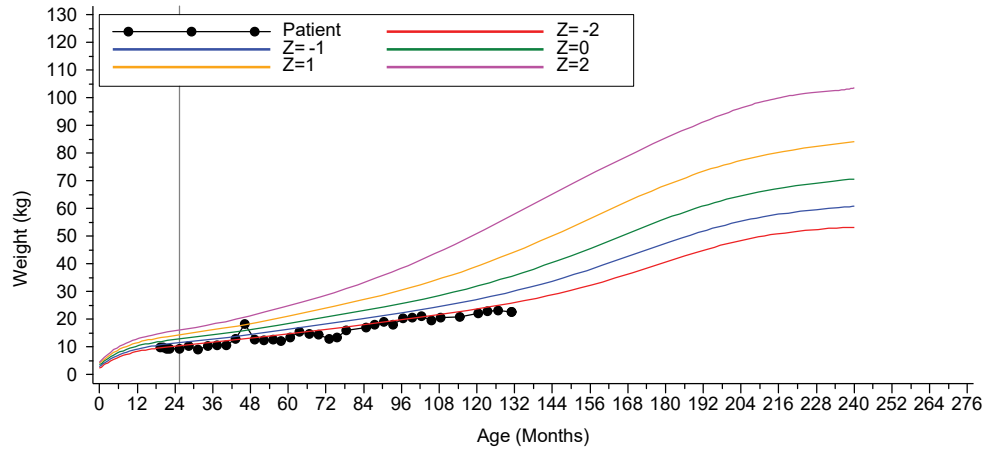

Patient 112  
Seizure History: Primary Generalized Seizures and Unknown

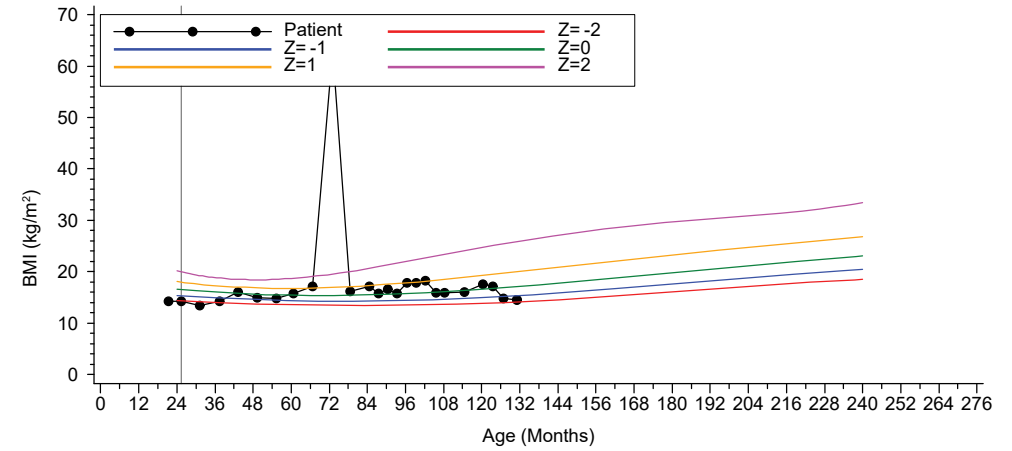

Patient 113  
Seizure History: Primary Generalized Seizures and Unknown

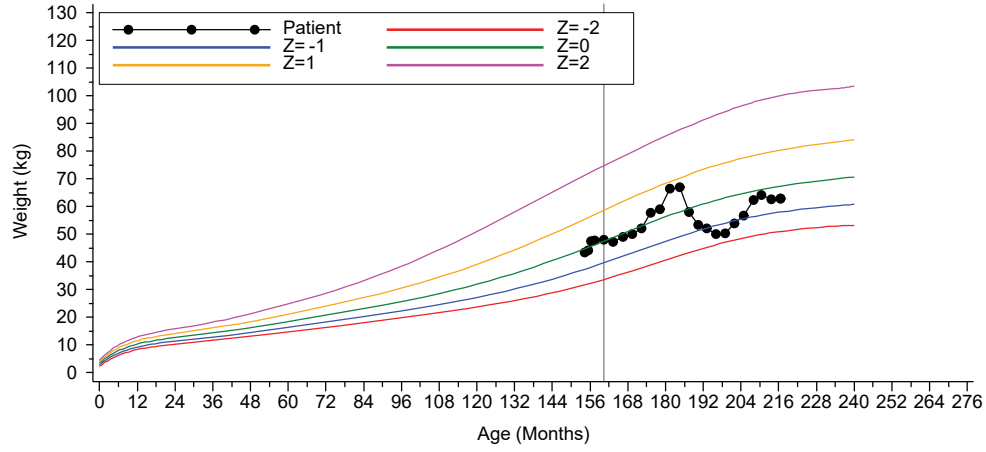

Patient 113  
Seizure History: Primary Generalized Seizures and Unknown

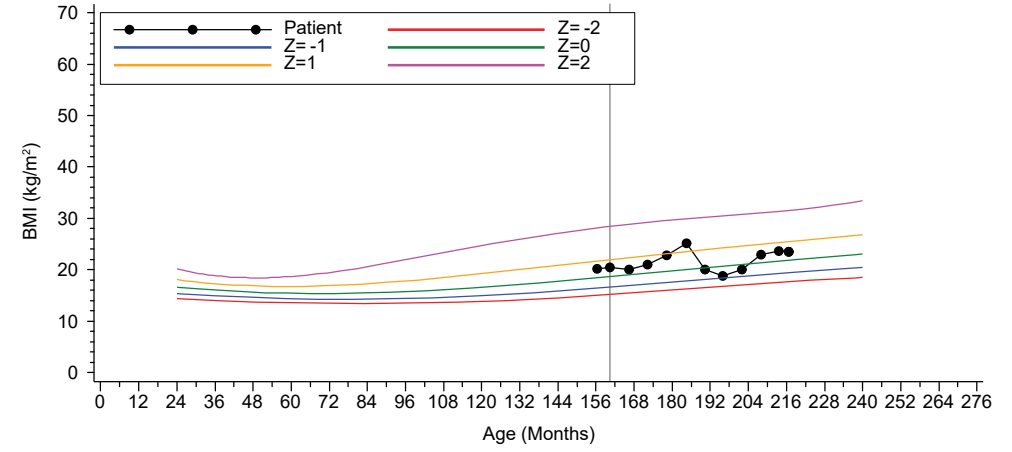

Patient 114  
Seizure History: Partial Onset Seizures

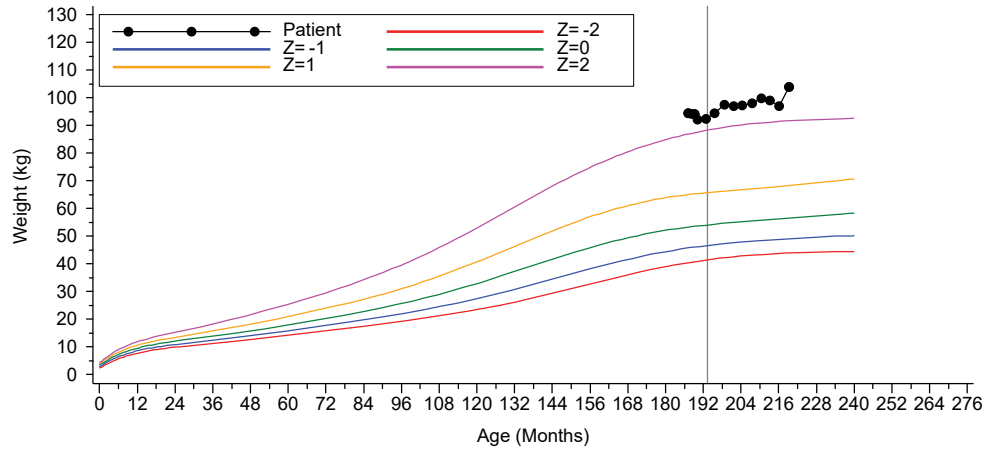

Patient 114  
Seizure History: Partial Onset Seizures

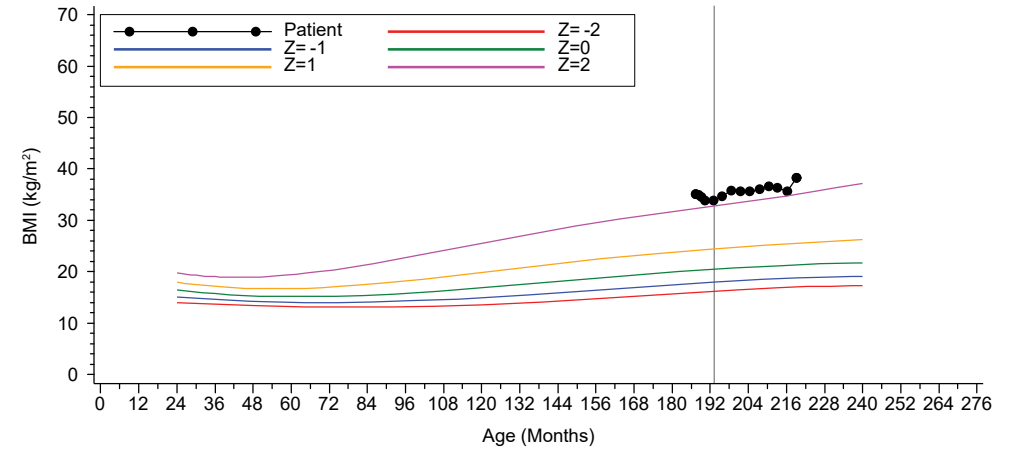

Patient 115  
Seizure History: Partial Onset Seizures

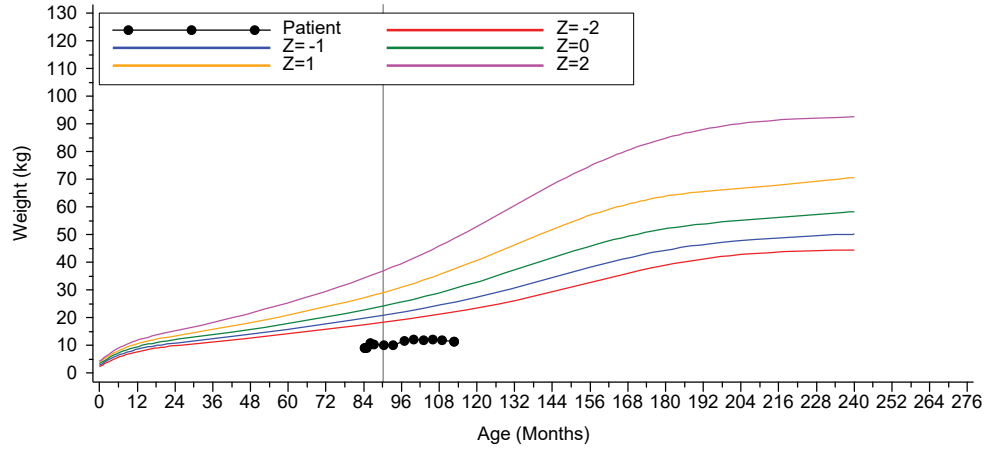

Patient 115  
Seizure History: Partial Onset Seizures

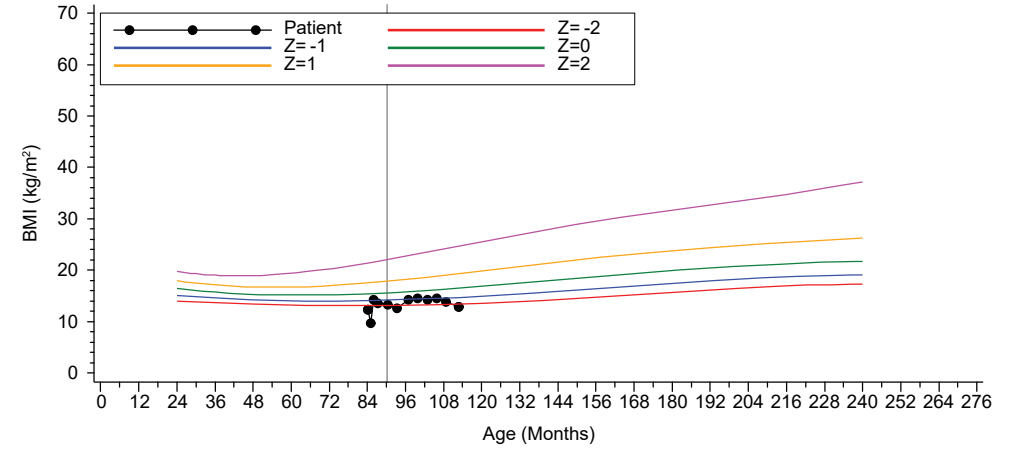

Patient 116  
Seizure History: Partial Onset Seizures

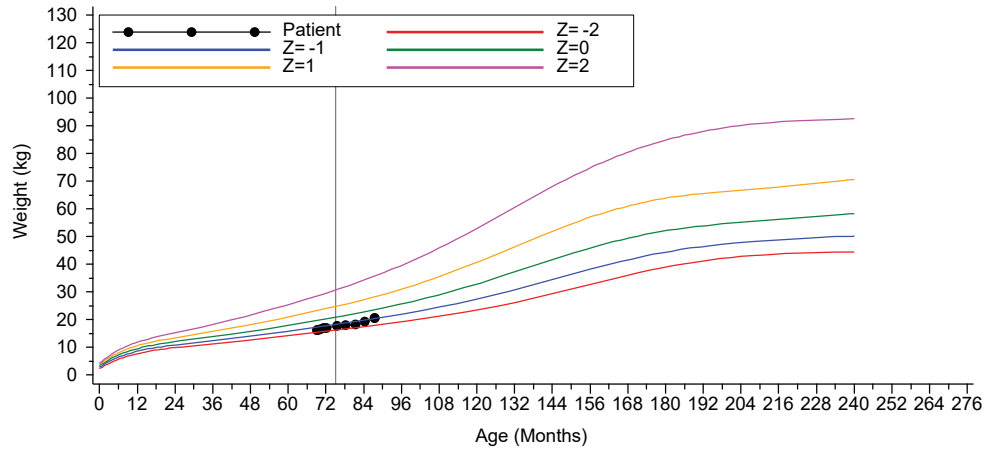

Patient 116  
Seizure History: Partial Onset Seizures

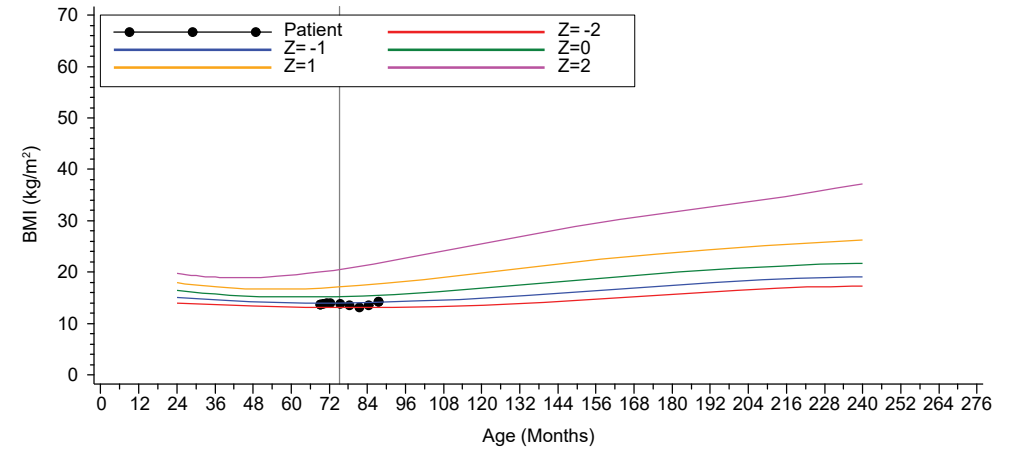

Patient 117  
Seizure History: Partial Onset Seizures

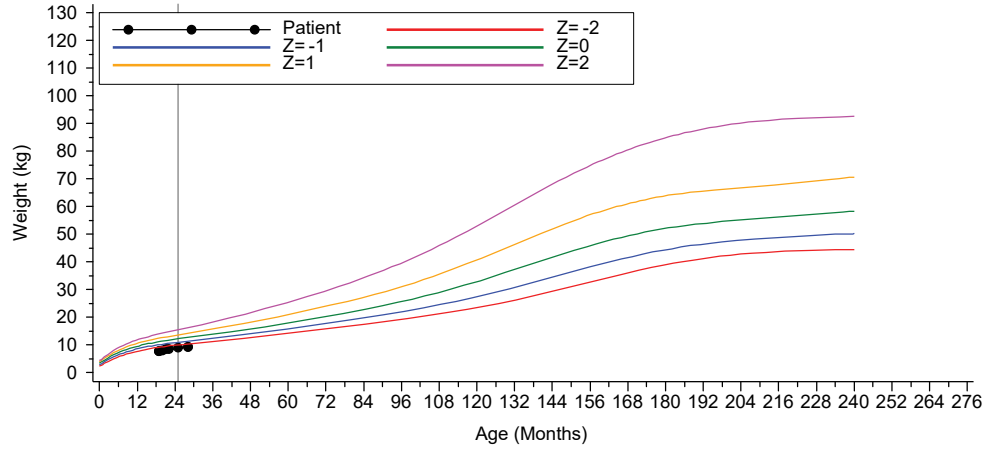

Patient 117  
Seizure History: Partial Onset Seizures

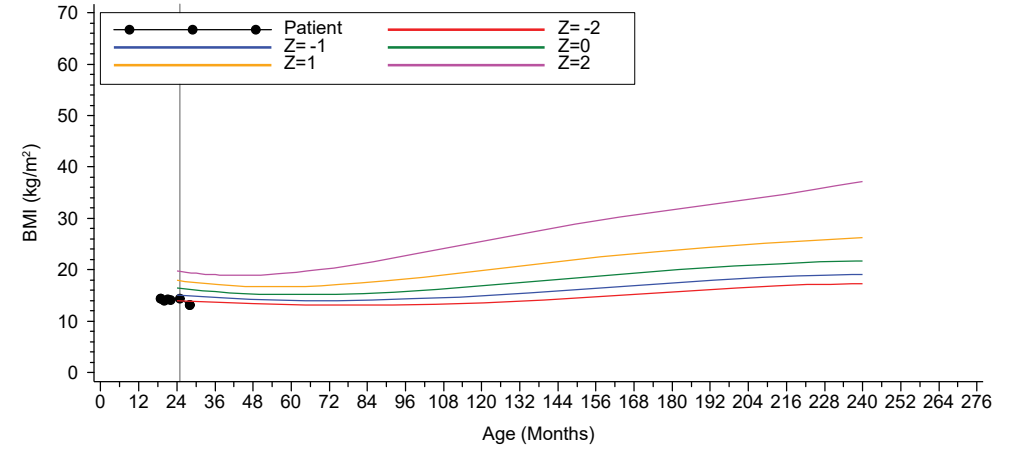

Patient 118  
Seizure History: Partial Onset Seizures

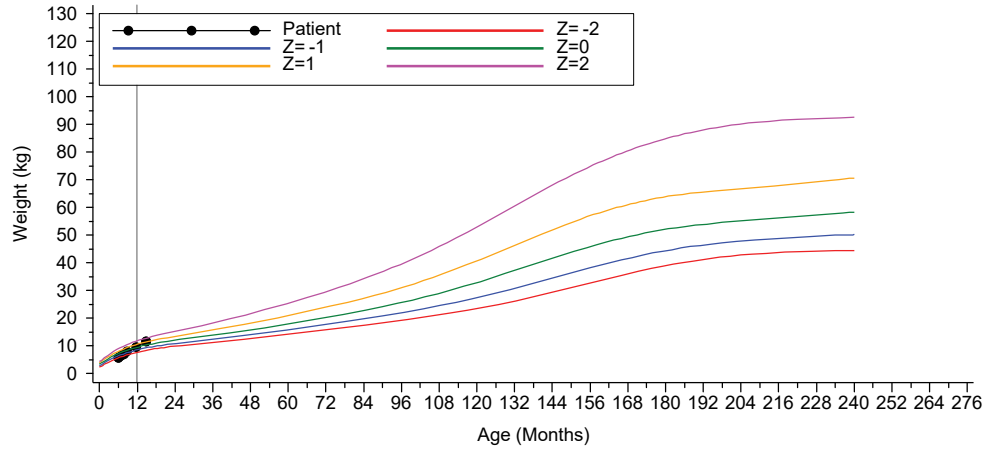

Patient 118  
Seizure History: Partial Onset Seizures

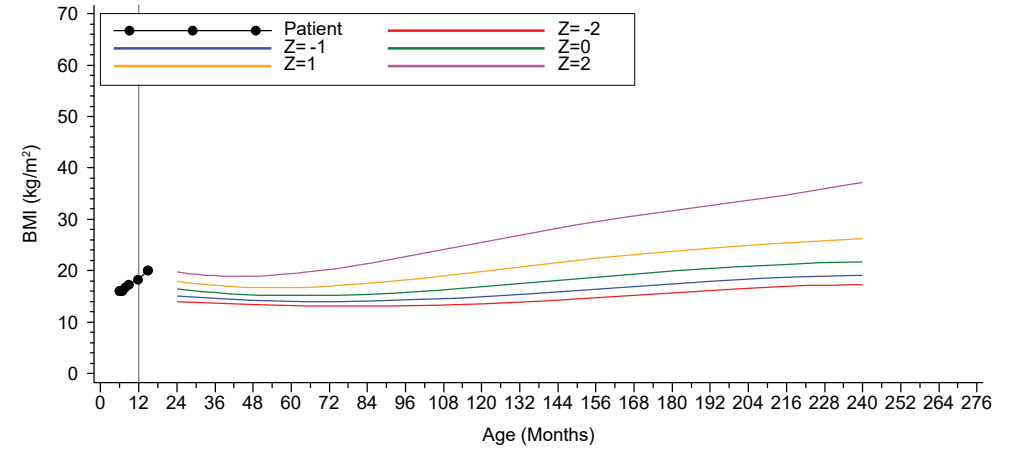

Patient 119  
Seizure History: Partial Onset Seizures

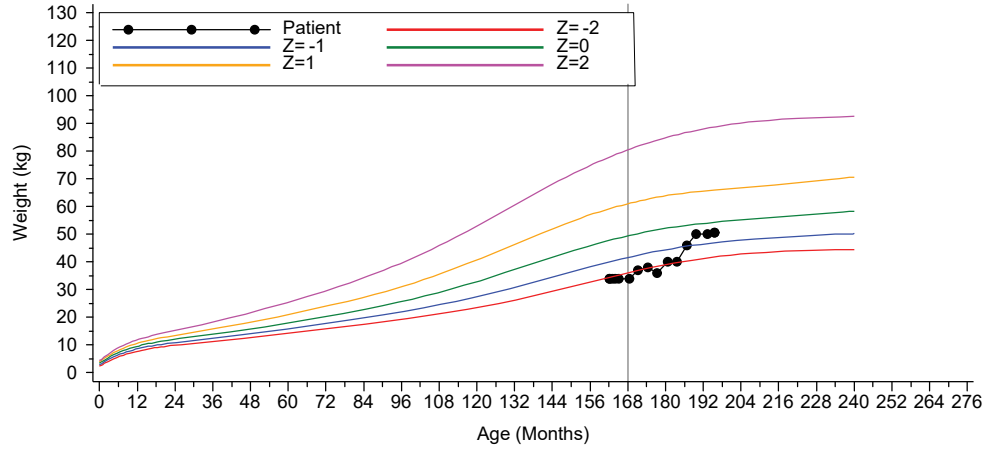

Patient 119  
Seizure History: Partial Onset Seizures

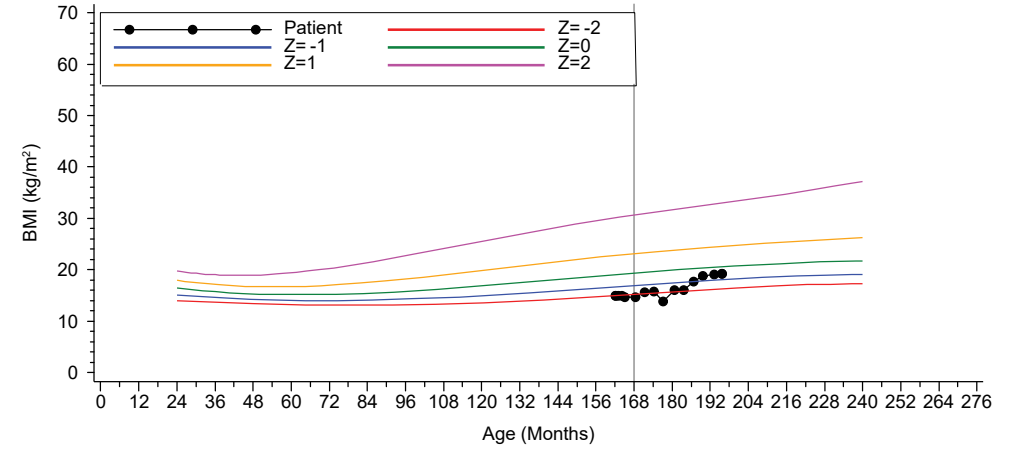

Patient 120  
Seizure History: Partial Onset Seizures

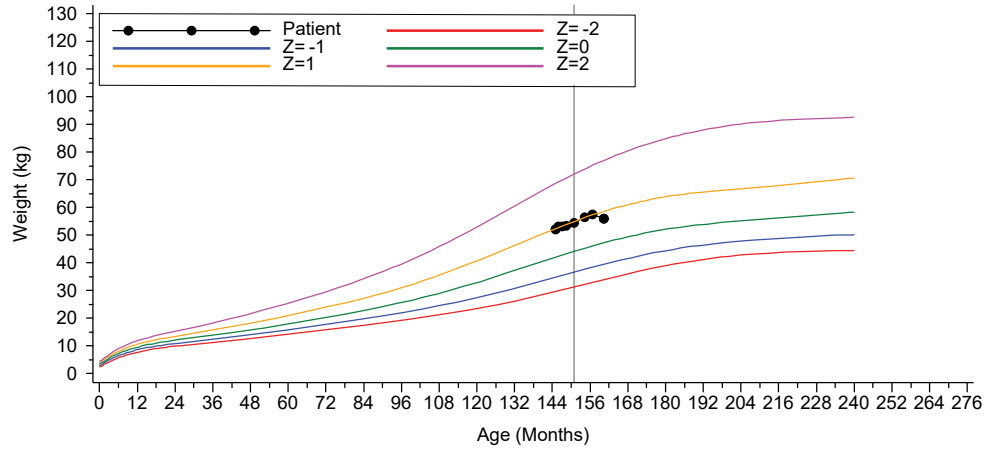

Patient 120  
Seizure History: Partial Onset Seizures

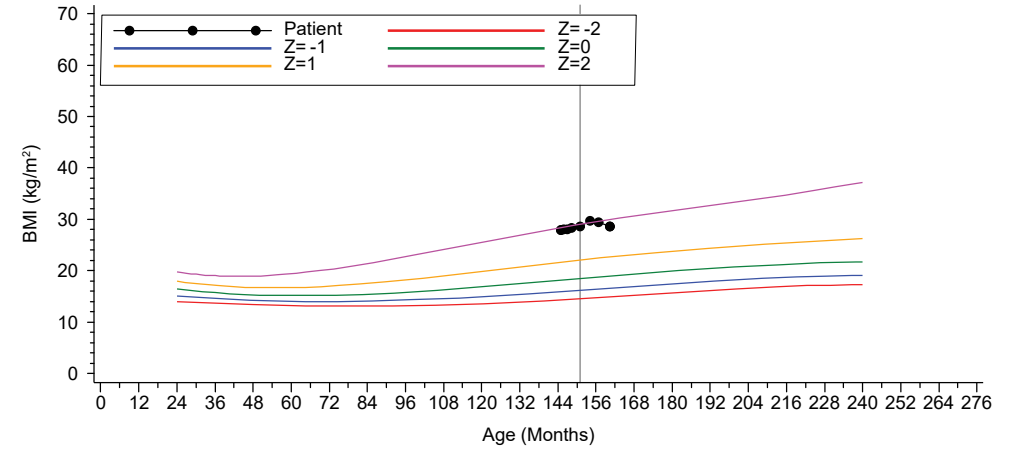

Patient 121  
Seizure History: Partial Onset Seizures

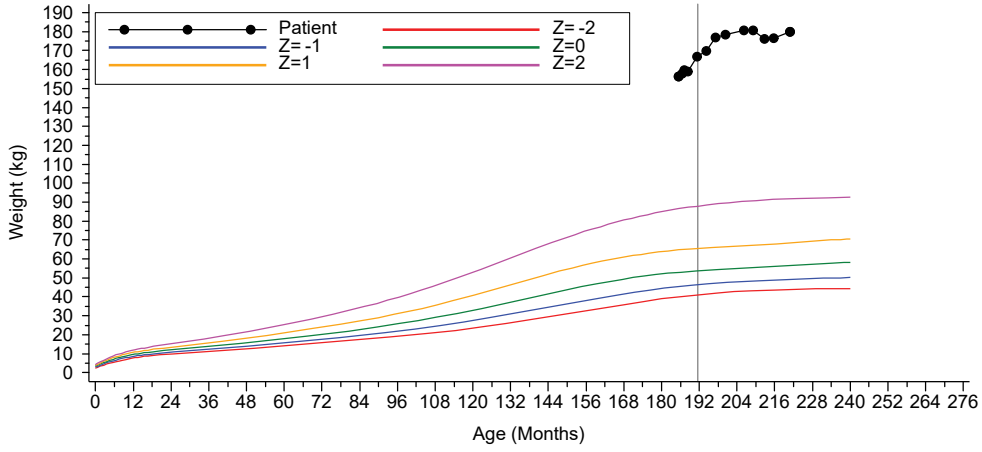

Patient 121  
Seizure History: Partial Onset Seizures

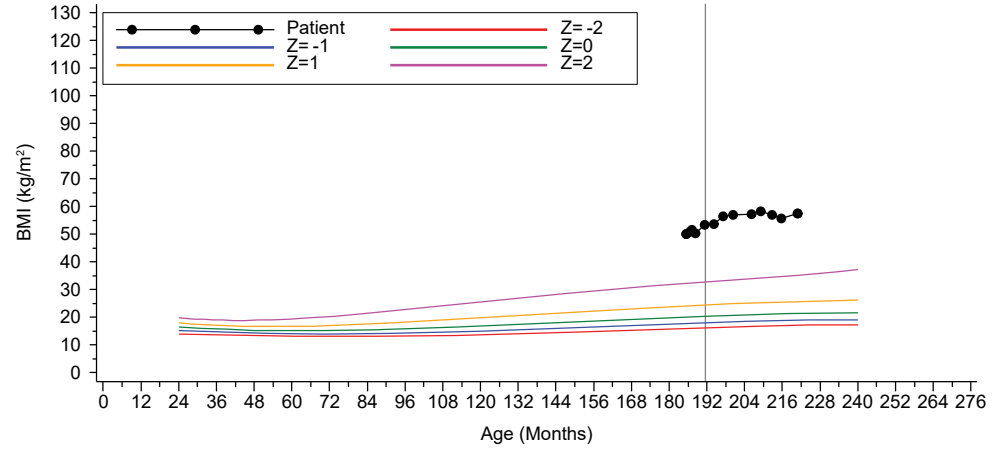

Patient 122  
Seizure History: Partial Onset Seizures

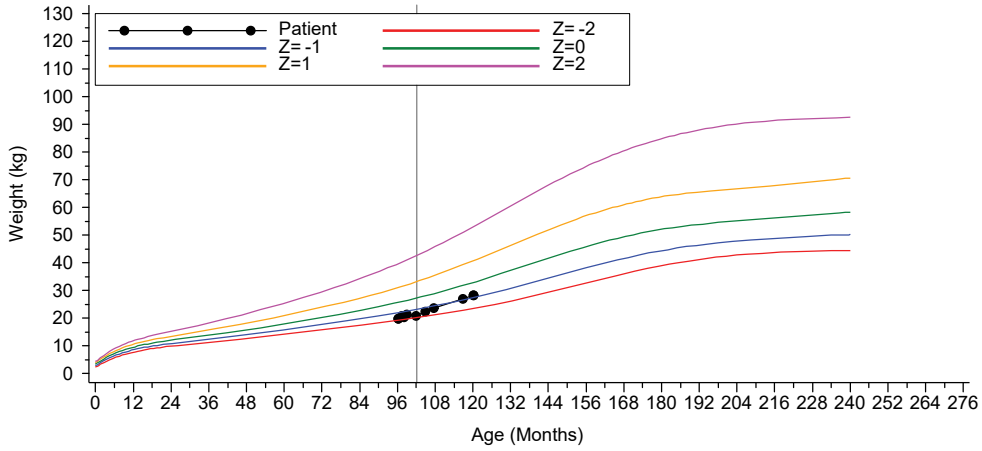

Patient 122  
Seizure History: Partial Onset Seizures

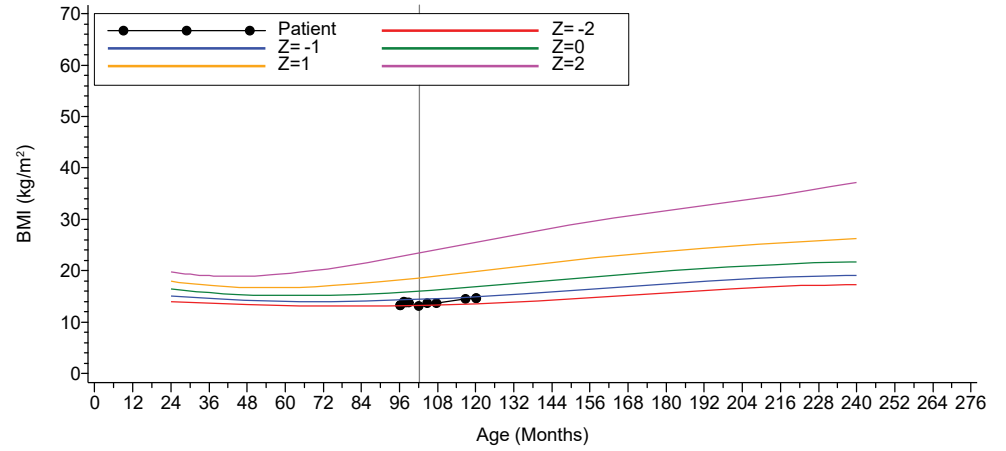

Patient 123  
Seizure History: Partial Onset Seizures

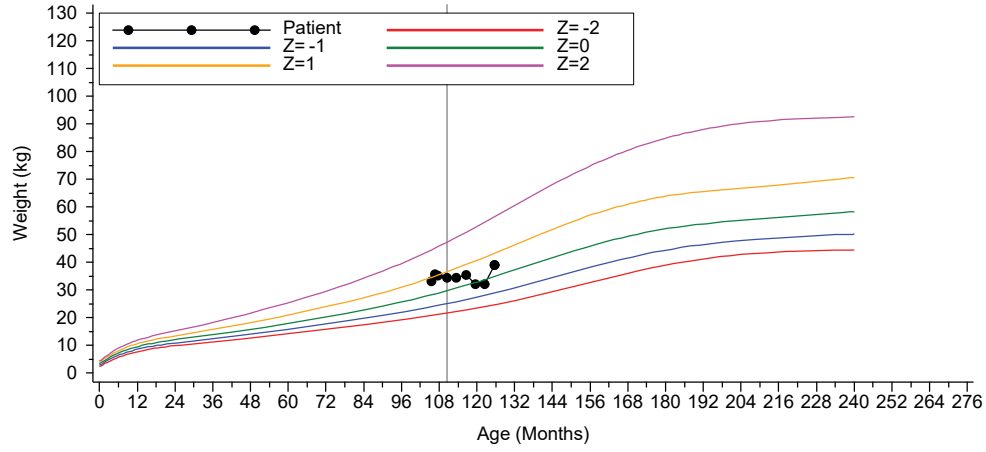

Patient 123  
Seizure History: Partial Onset Seizures

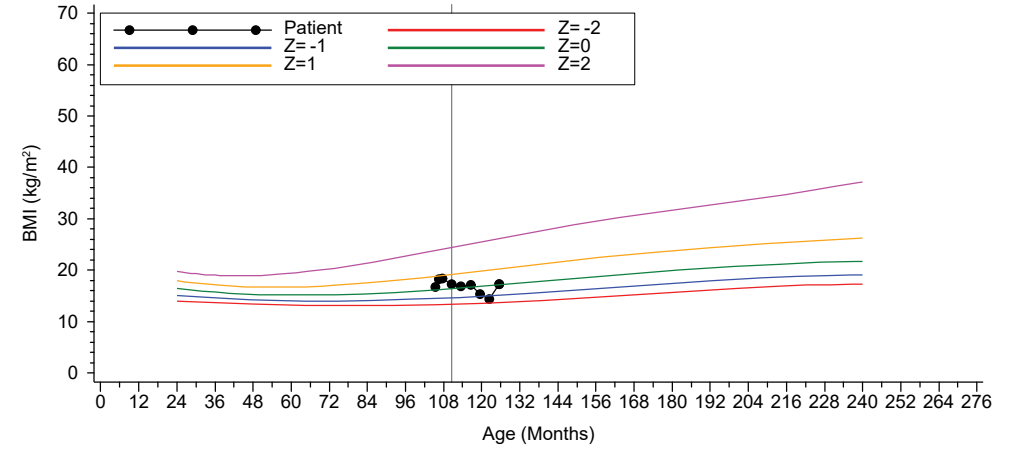

Patient 124  
Seizure History: Partial Onset Seizures

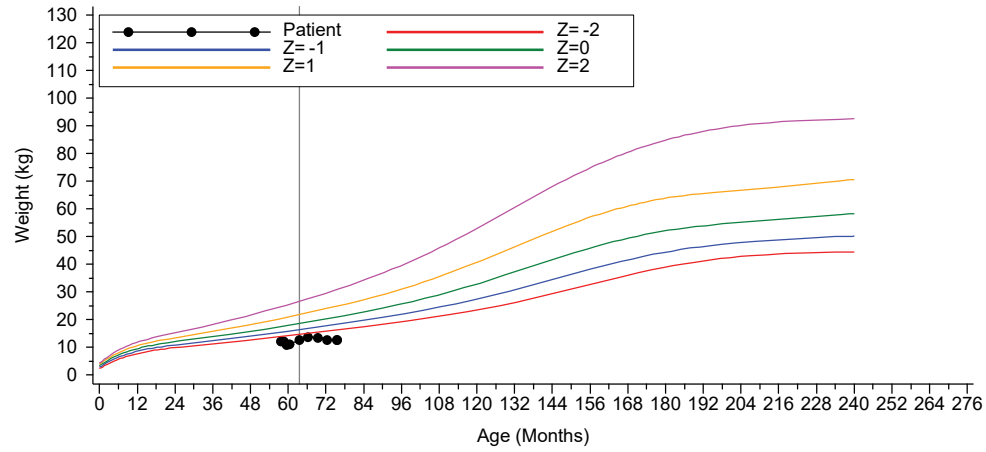

Patient 124  
Seizure History: Partial Onset Seizures

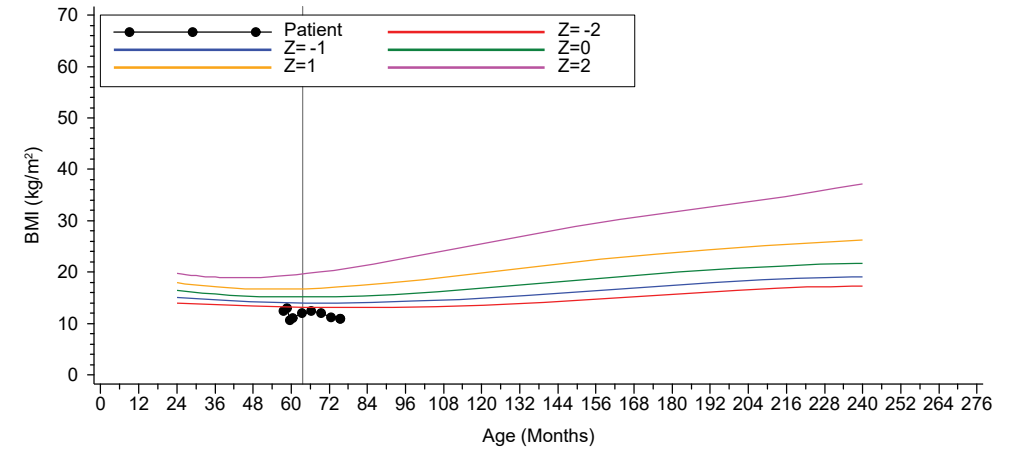

Patient 125  
Seizure History: Partial Onset Seizures

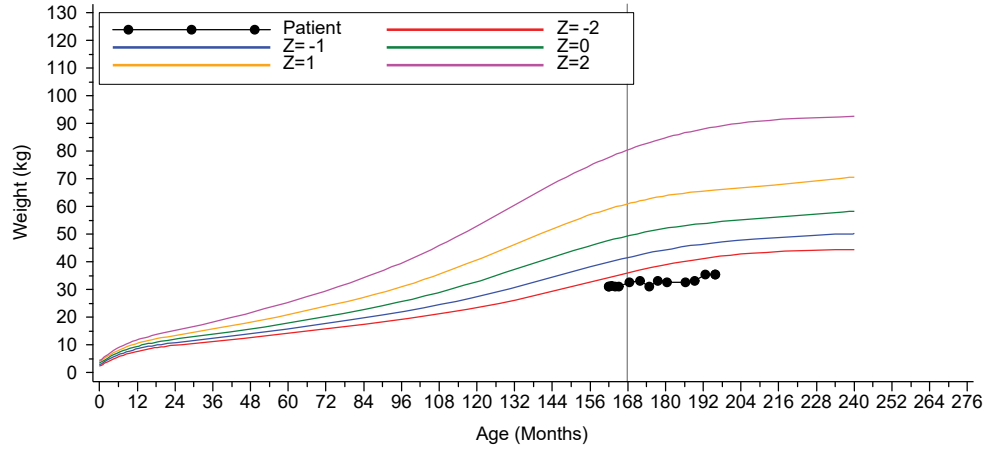

Patient 125  
Seizure History: Partial Onset Seizures

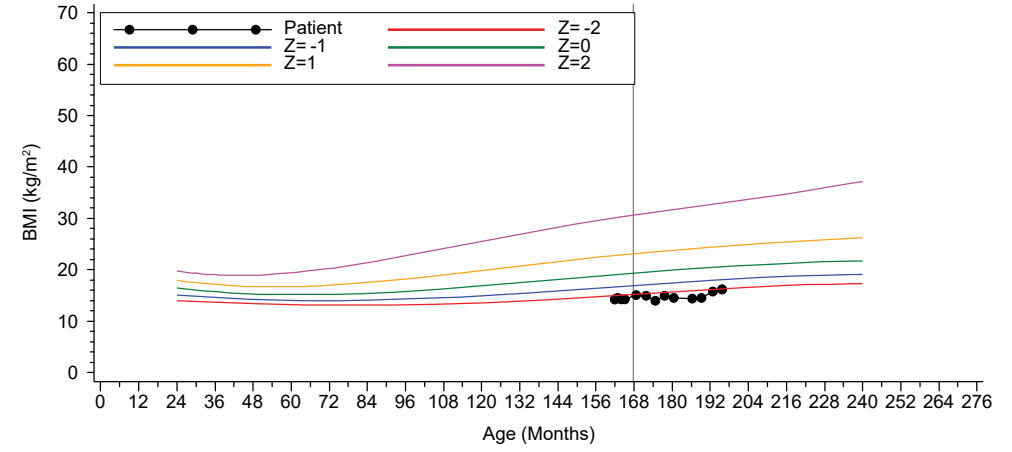

Patient 126  
Seizure History: Partial Onset Seizures

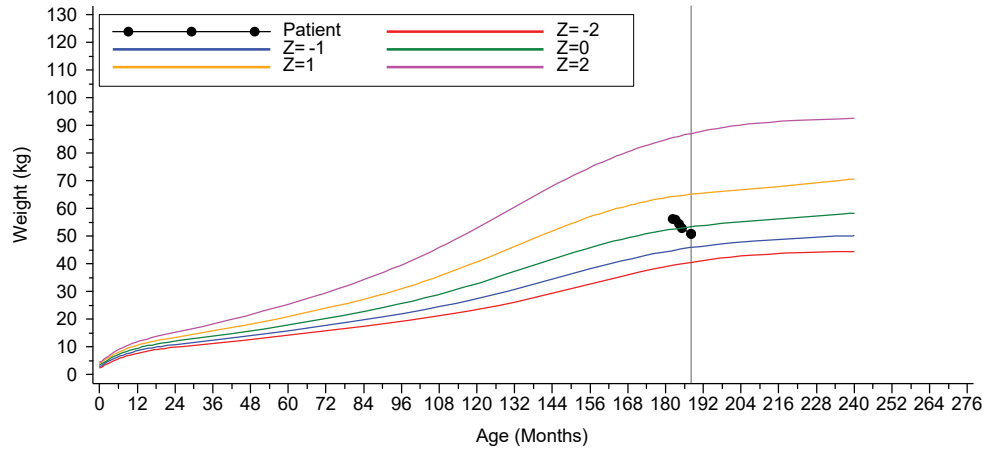

Patient 126  
Seizure History: Partial Onset Seizures

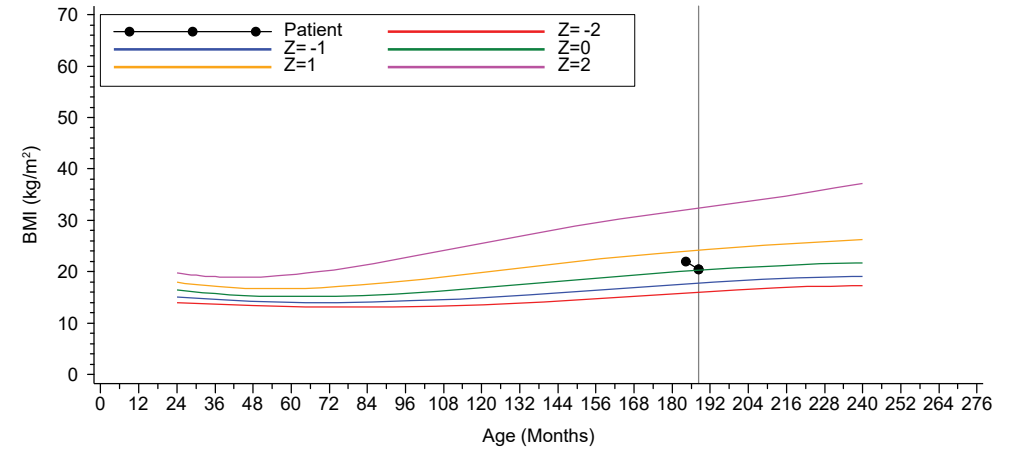



Patient 127  
Seizure History: Partial Onset Seizures

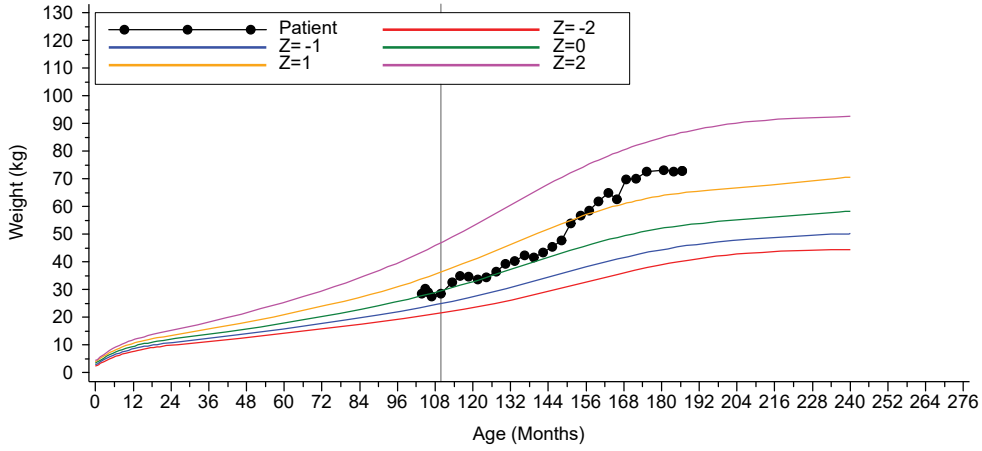

Patient 127  
Seizure History: Partial Onset Seizures

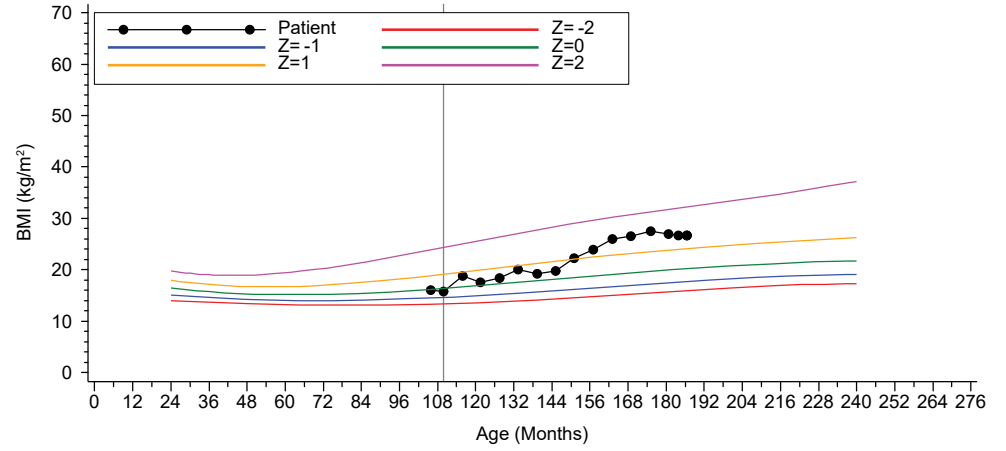

Patient 128  
Seizure History: Partial Onset Seizures

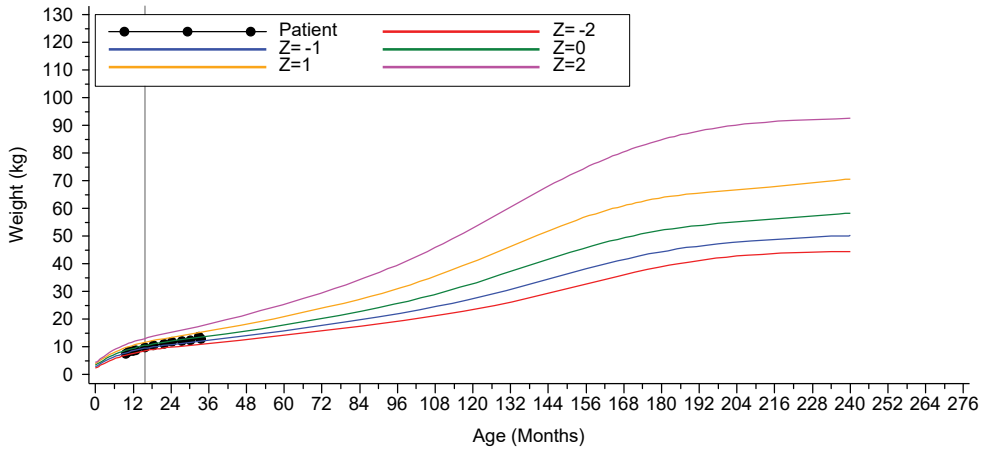

Patient 128  
Seizure History: Partial Onset Seizures

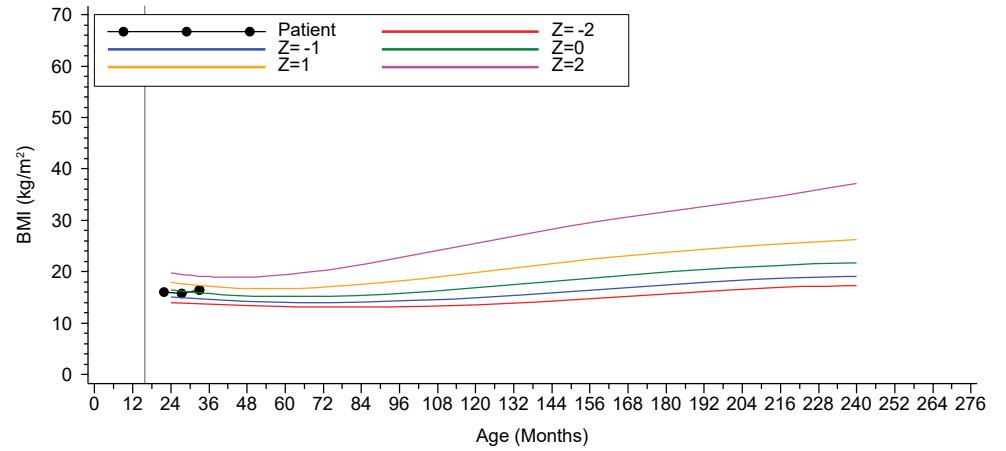

Patient 129  
Seizure History: Partial Onset Seizures

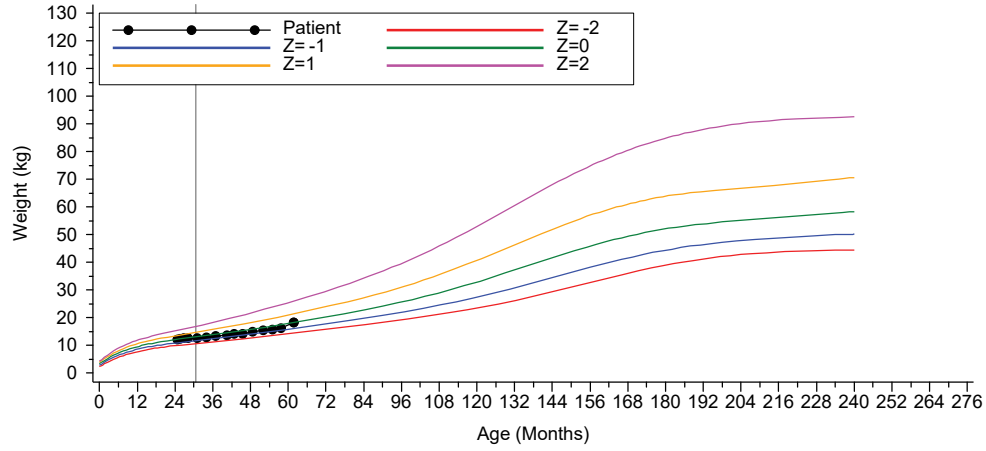

Patient 129  
Seizure History: Partial Onset Seizures

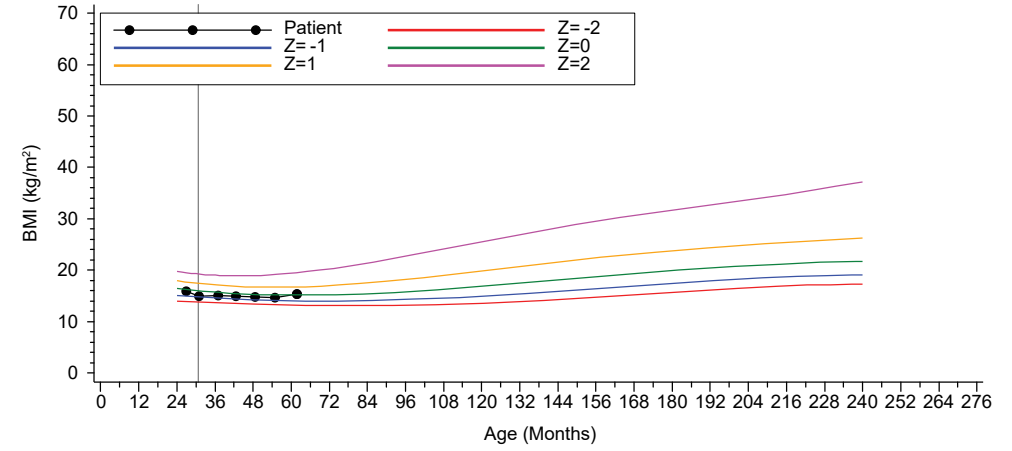

Patient 130  
Seizure History: Partial Onset Seizures

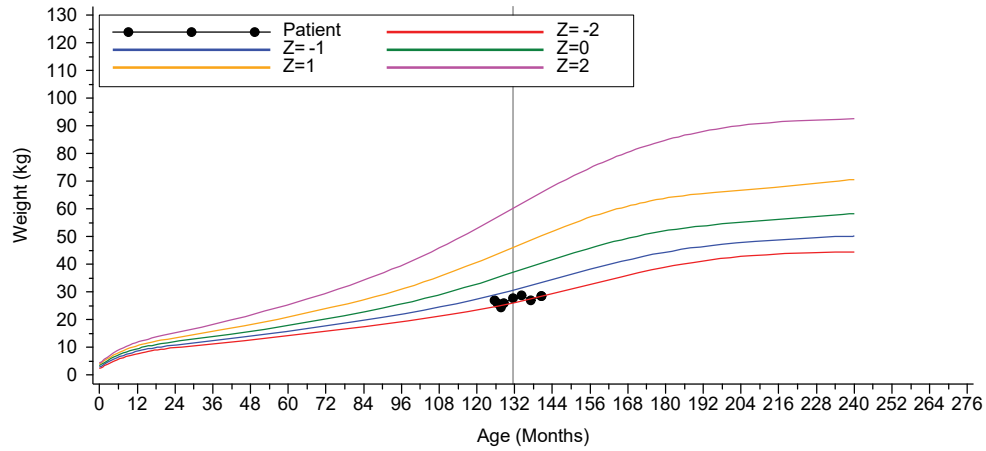

Patient 130  
Seizure History: Partial Onset Seizures

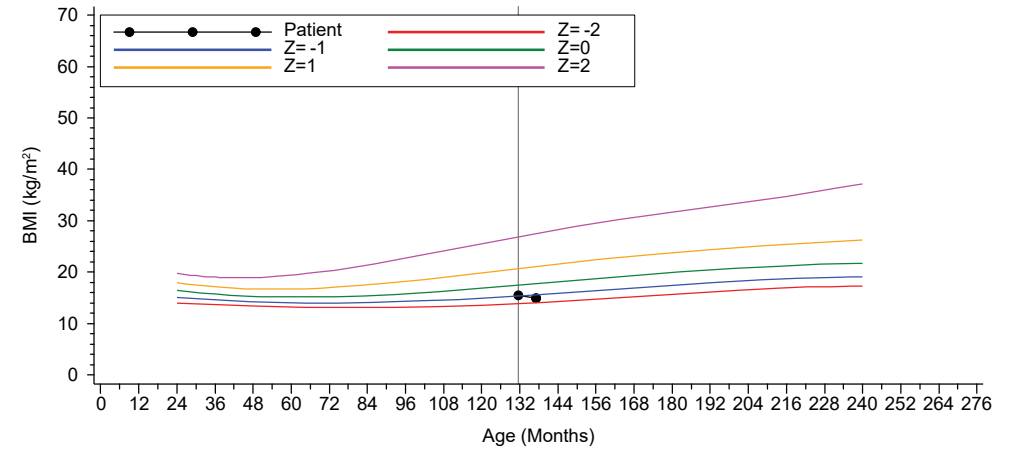

Patient 131  
Seizure History: Partial Onset Seizures

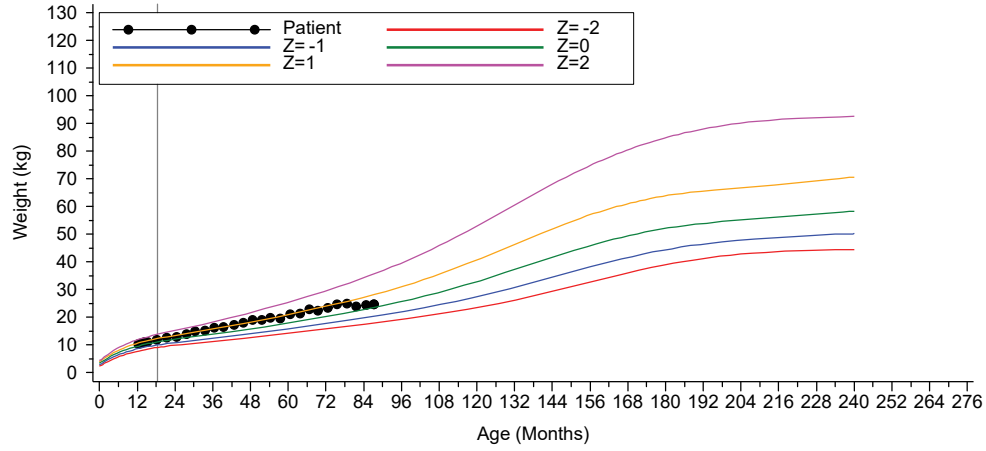

Patient 131  
Seizure History: Partial Onset Seizures

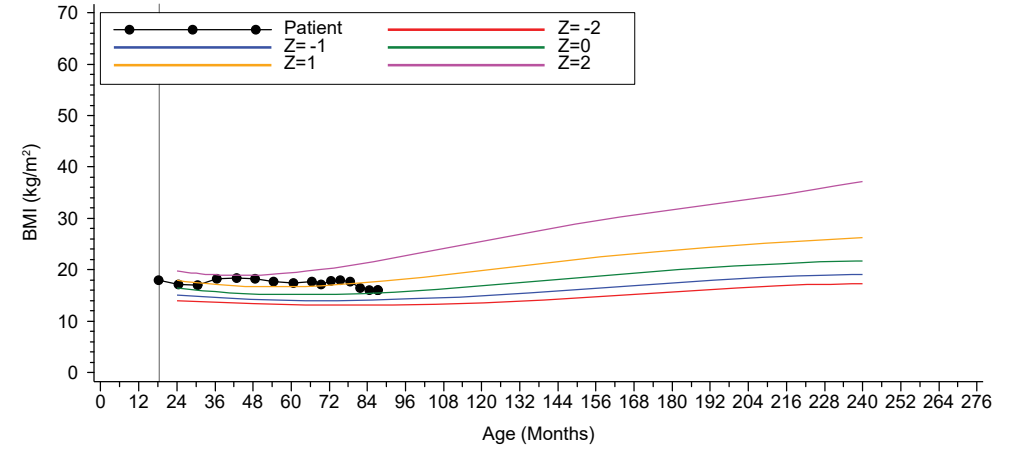

Patient 132  
Seizure History: Partial Onset Seizures

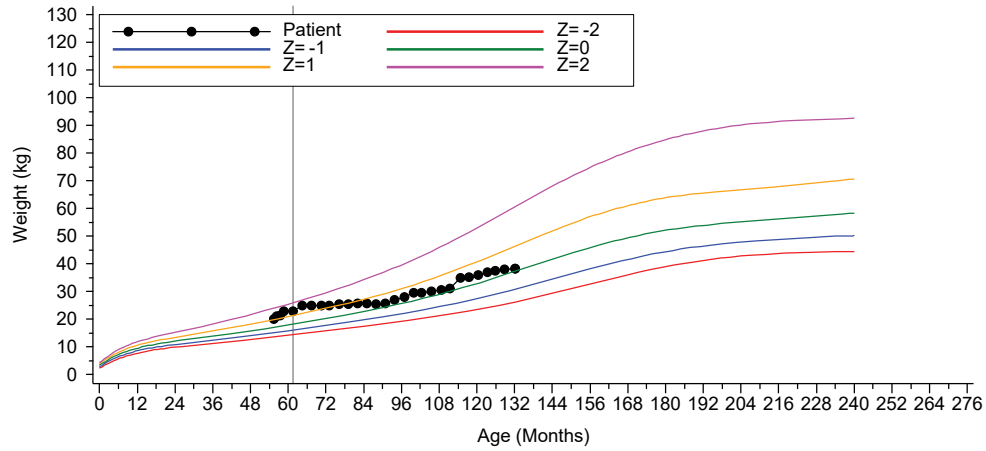

Patient 132  
Seizure History: Partial Onset Seizures

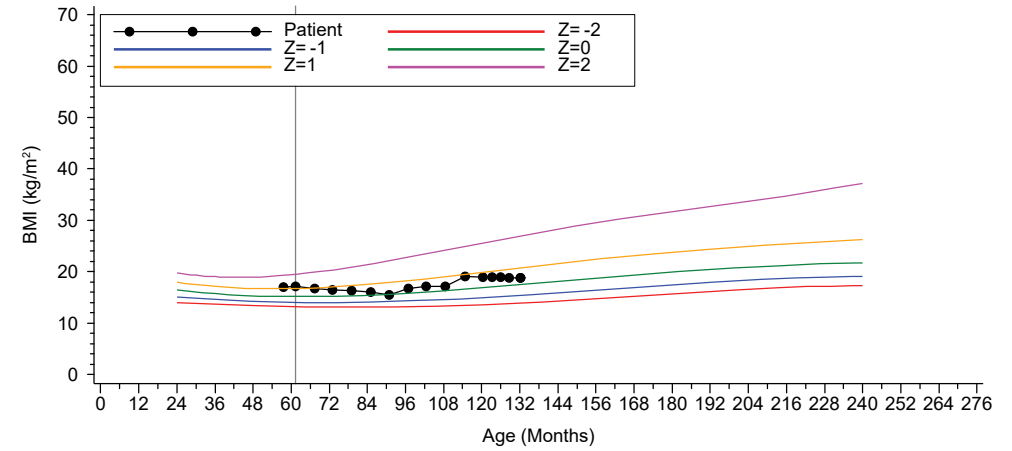

Patient 133  
Seizure History: Partial Onset Seizures

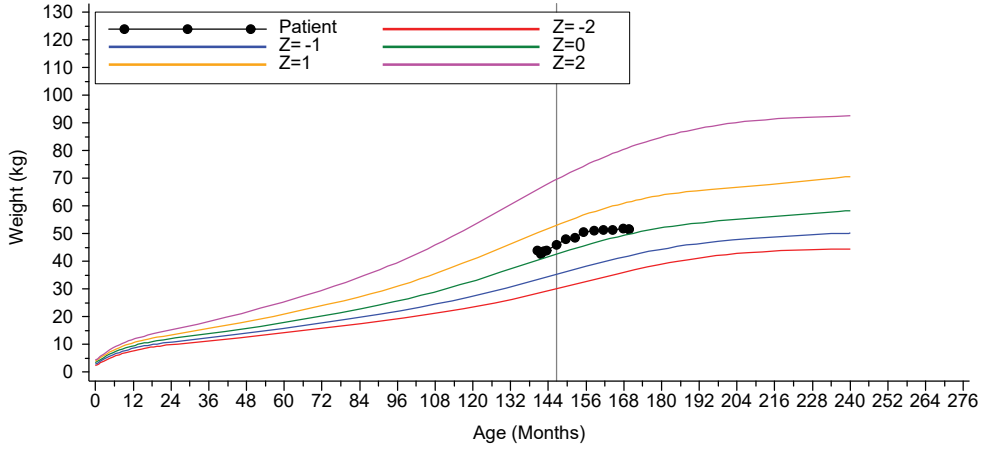

Patient 133  
Seizure History: Partial Onset Seizures

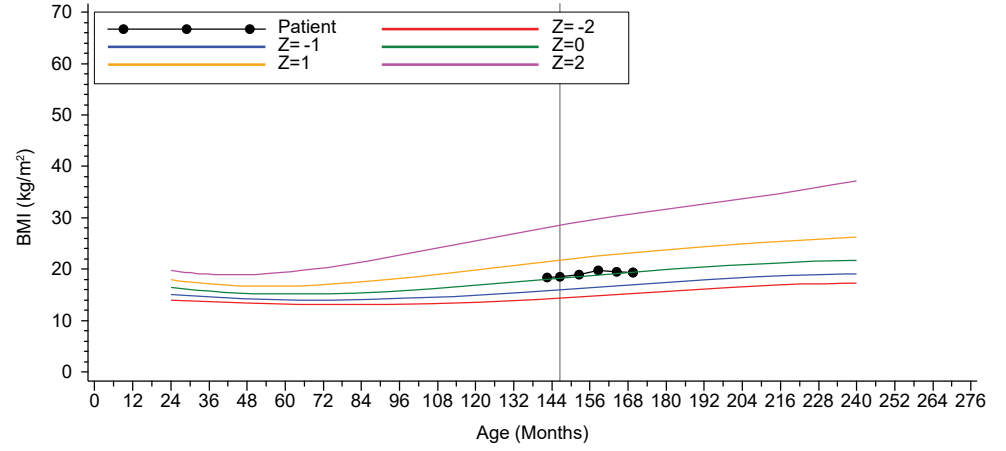

Patient 134  
Seizure History: Partial Onset Seizures

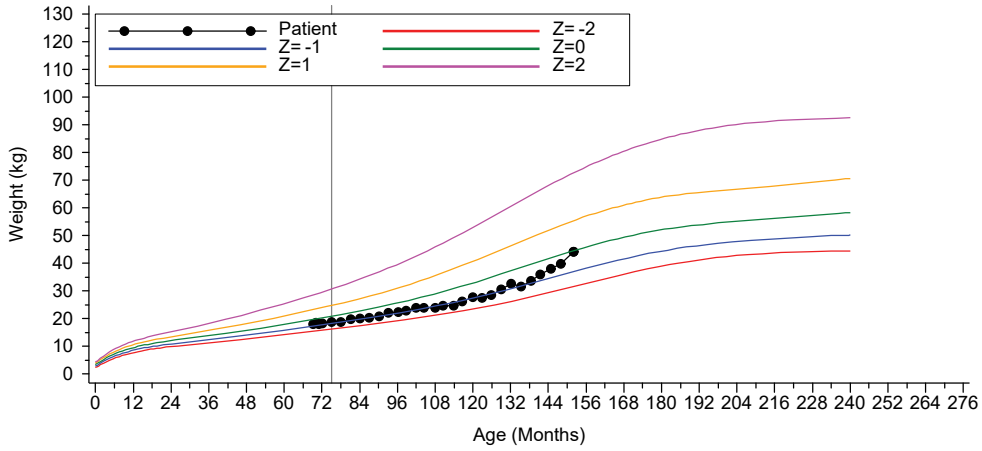

Patient 134  
Seizure History: Partial Onset Seizures

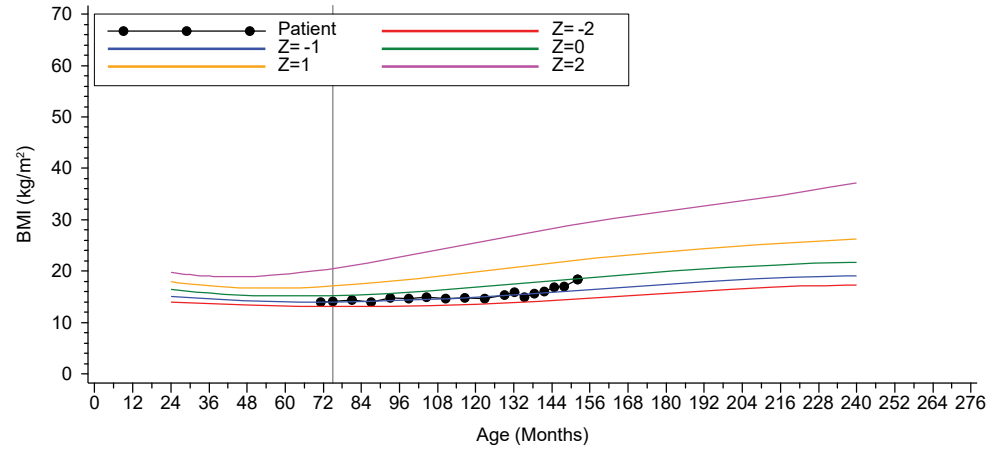

Patient 135  
Seizure History: Partial Onset Seizures

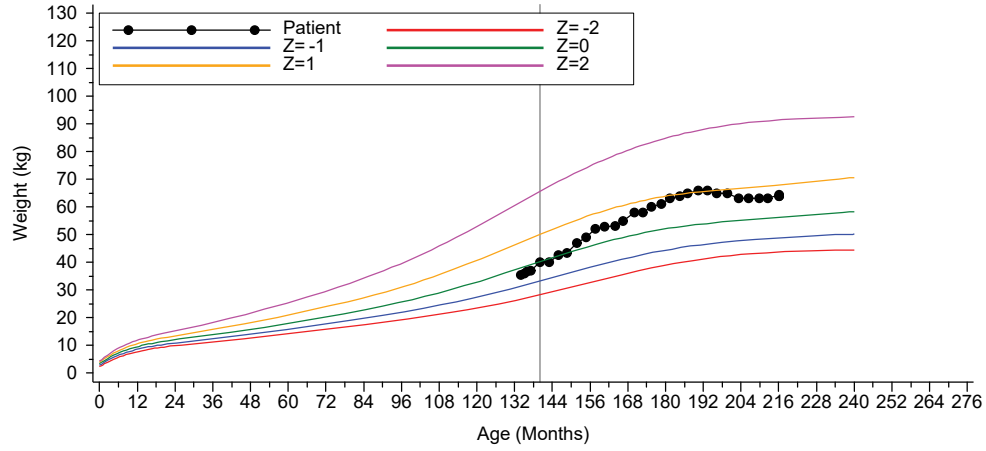

Patient 135  
Seizure History: Partial Onset Seizures

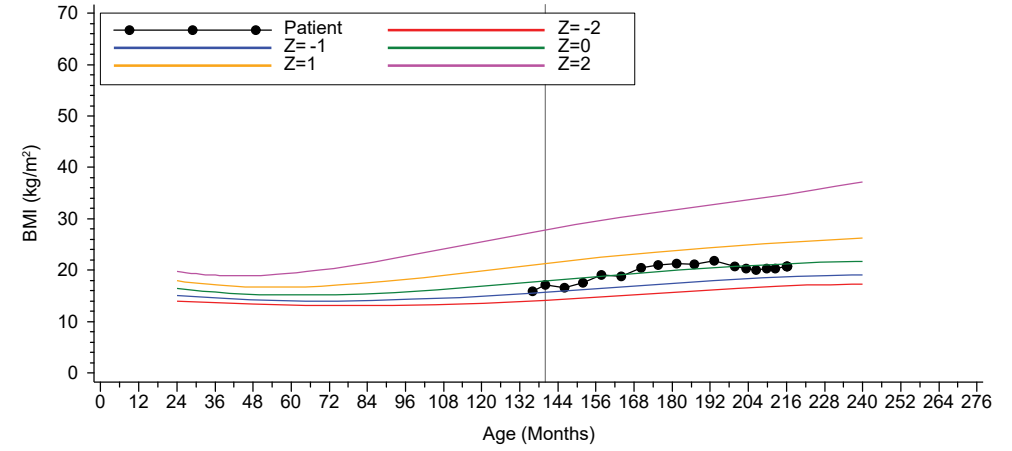

Patient 136  
Seizure History: Partial Onset Seizures

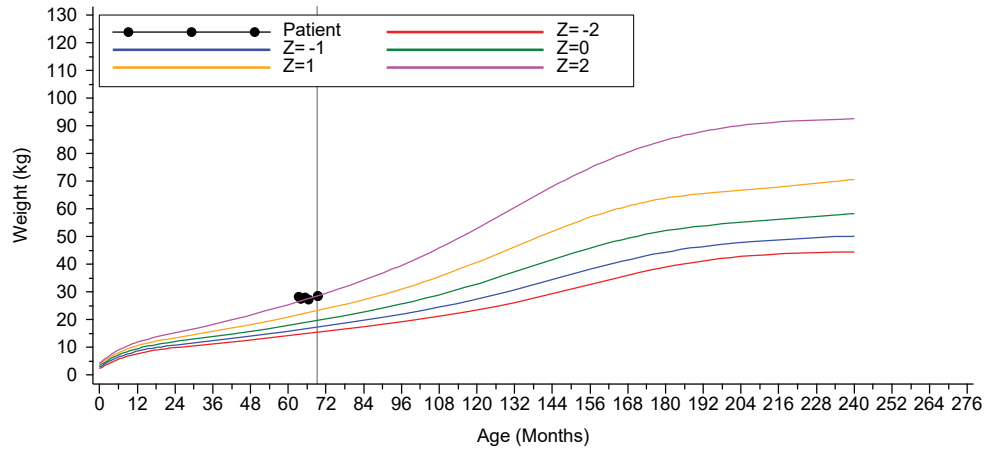

Patient 136  
Seizure History: Partial Onset Seizures

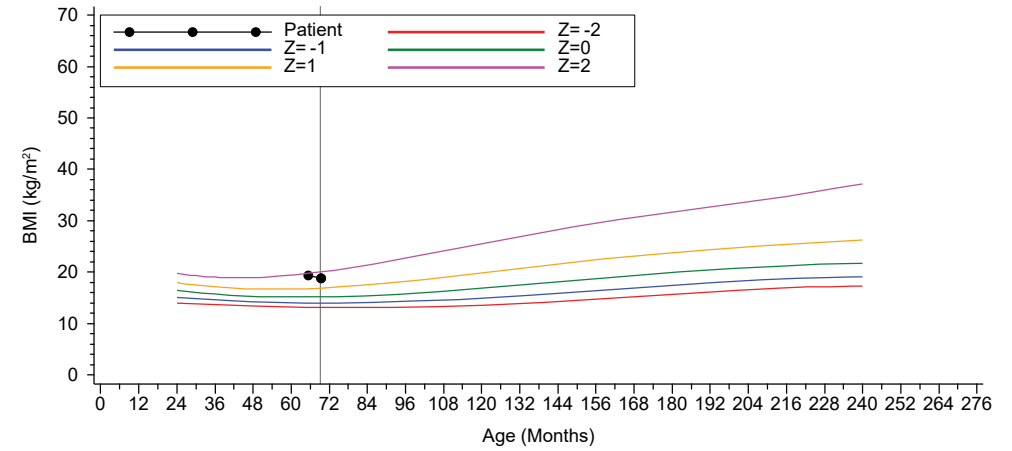

Patient 137  
Seizure History: Partial Onset Seizures

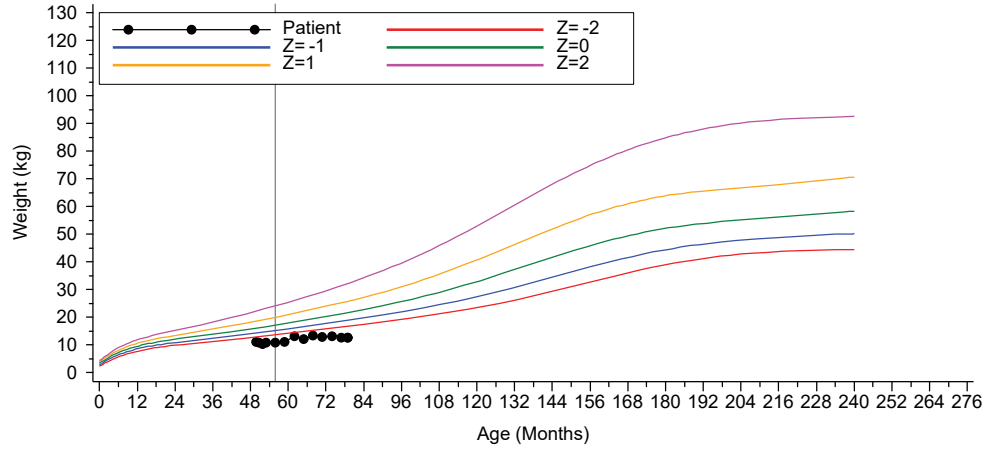

Patient 137  
Seizure History: Partial Onset Seizures

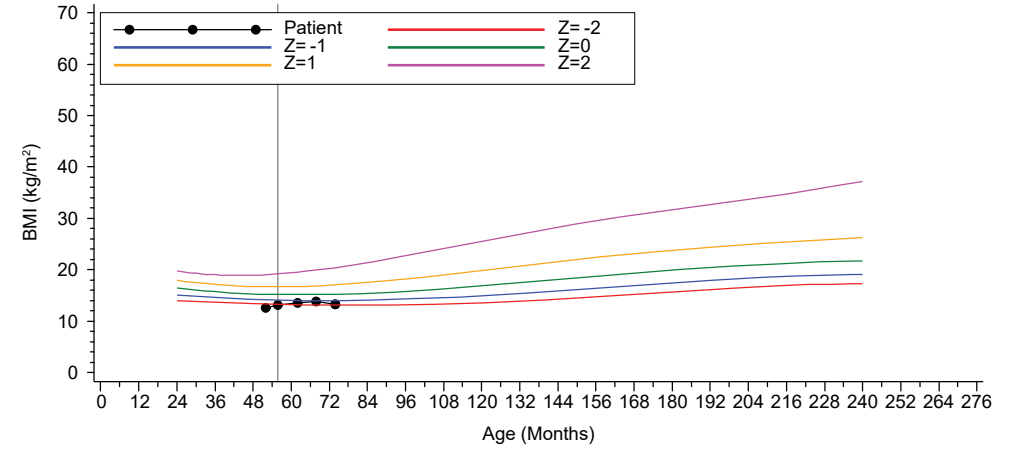

Patient 138  
Seizure History: Partial Onset Seizures

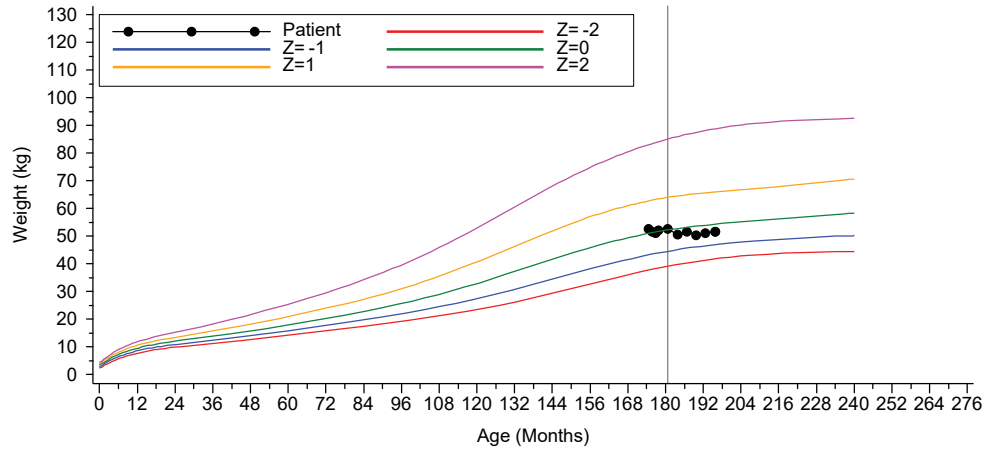

Patient 138  
Seizure History: Partial Onset Seizures

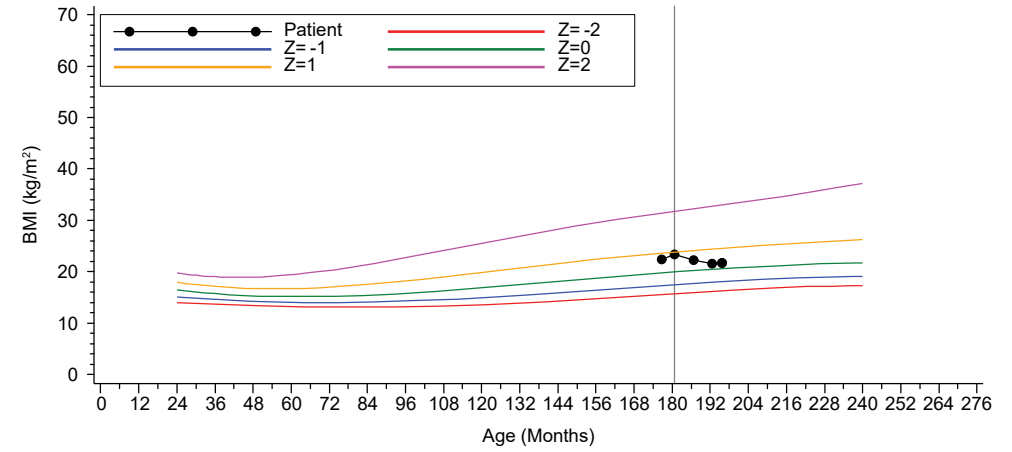

Patient 139  
Seizure History: Partial Onset Seizures

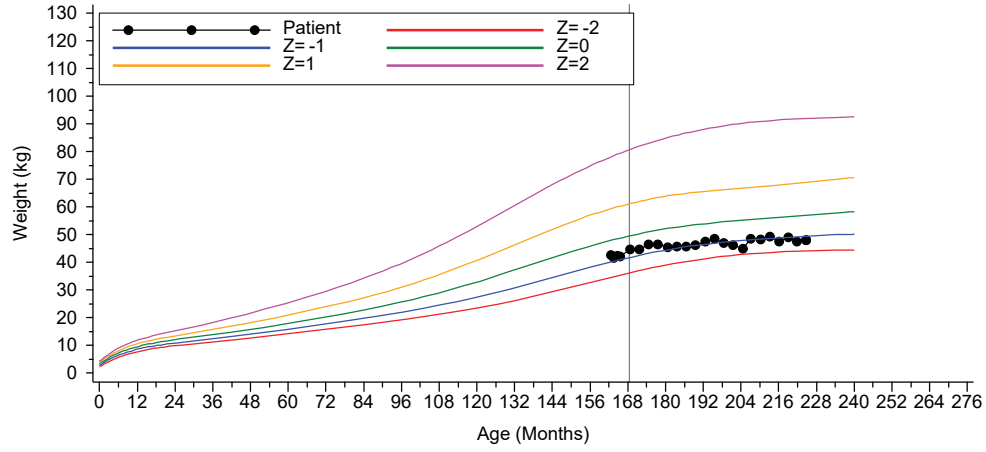

Patient 139  
Seizure History: Partial Onset Seizures

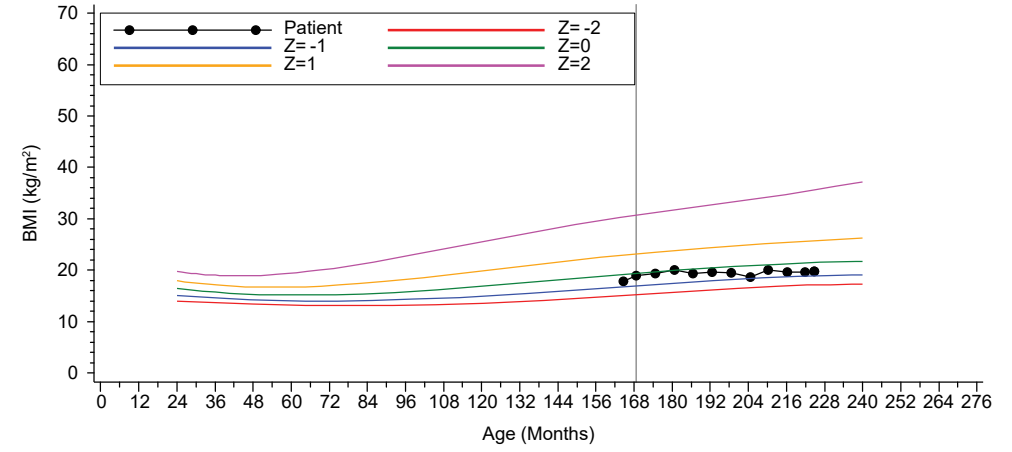

Patient 140  
Seizure History: Partial Onset Seizures

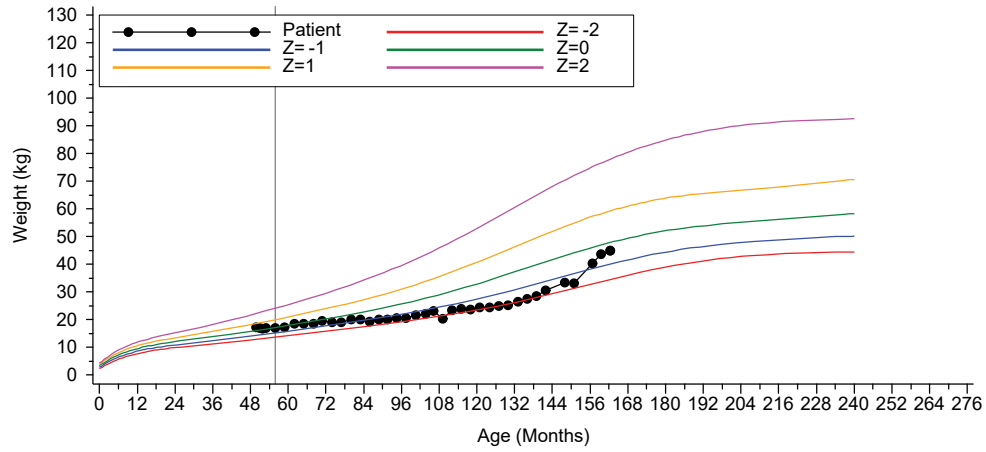

Patient 140  
Seizure History: Partial Onset Seizures

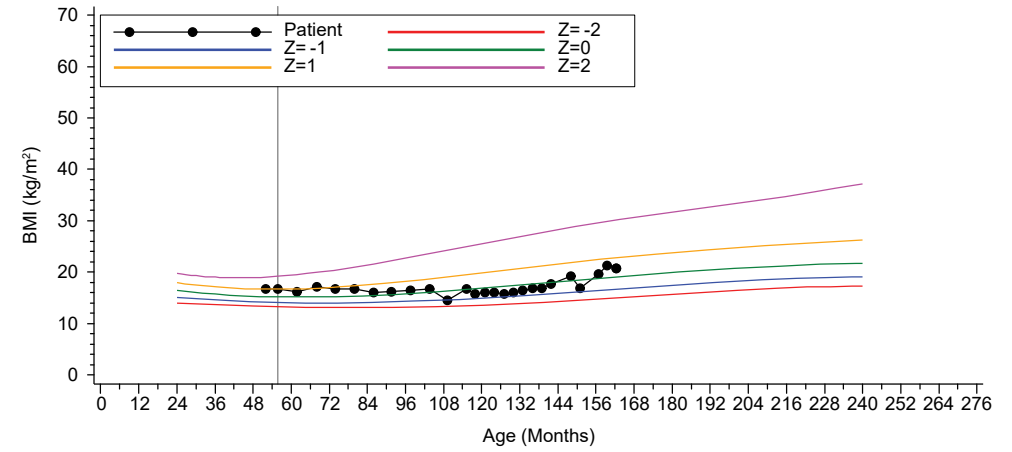

Patient 141  
Seizure History: Partial Onset Seizures

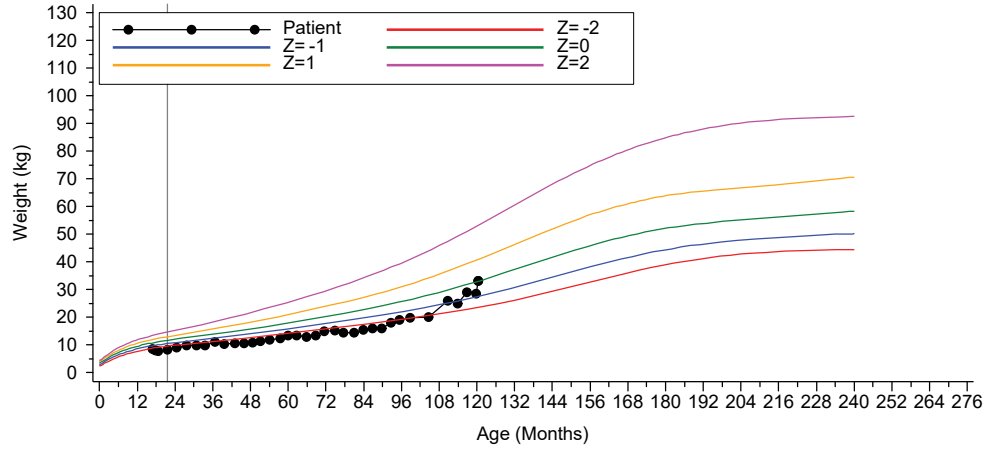

Patient 141  
Seizure History: Partial Onset Seizures

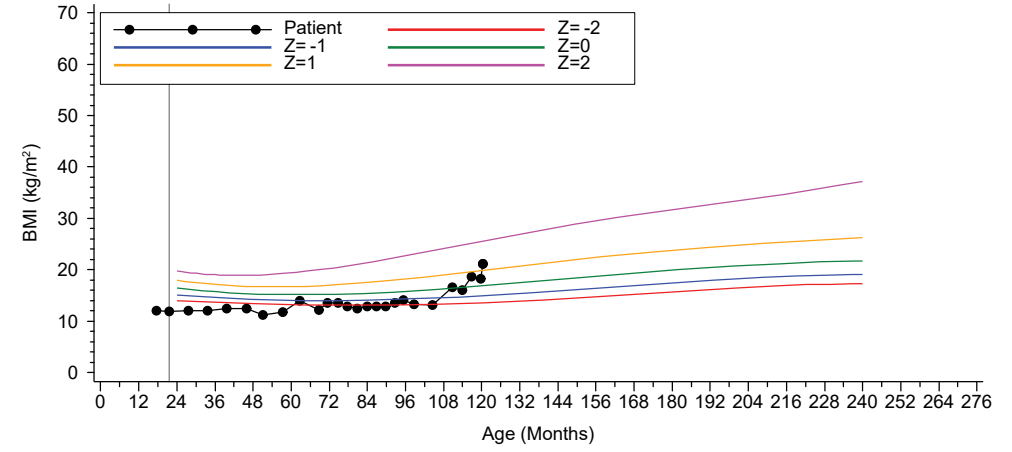

Patient 142  
Seizure History: Partial Onset Seizures

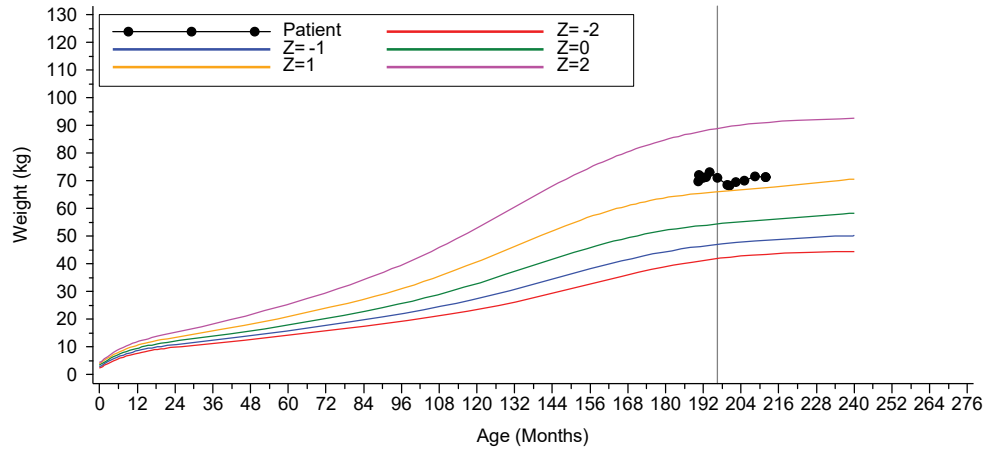

Patient 142  
Seizure History: Partial Onset Seizures

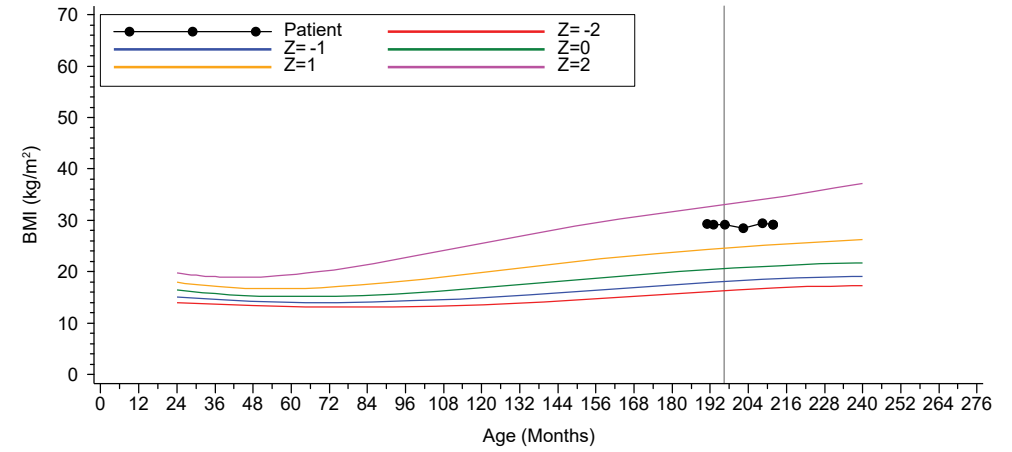



Patient 143  
Seizure History: Partial Onset Seizures

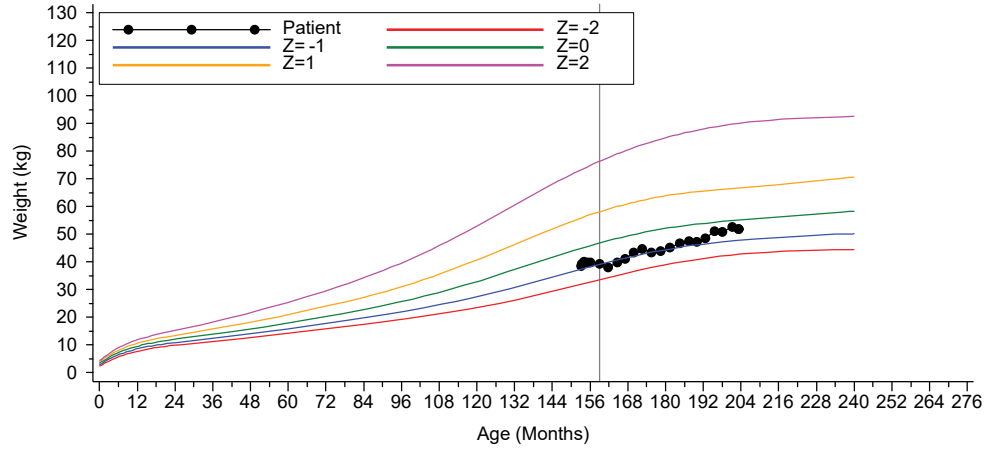

Patient 143  
Seizure History: Partial Onset Seizures

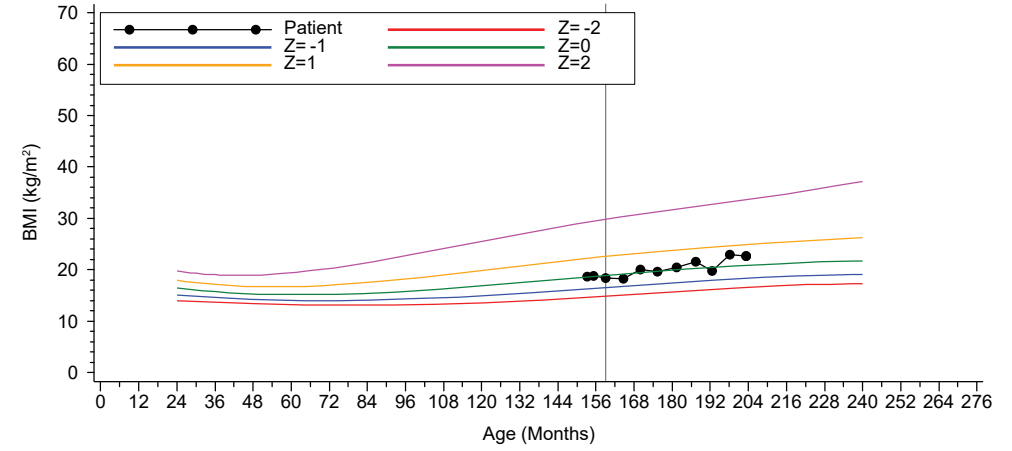

Patient 144  
Seizure History: Partial Onset Seizures

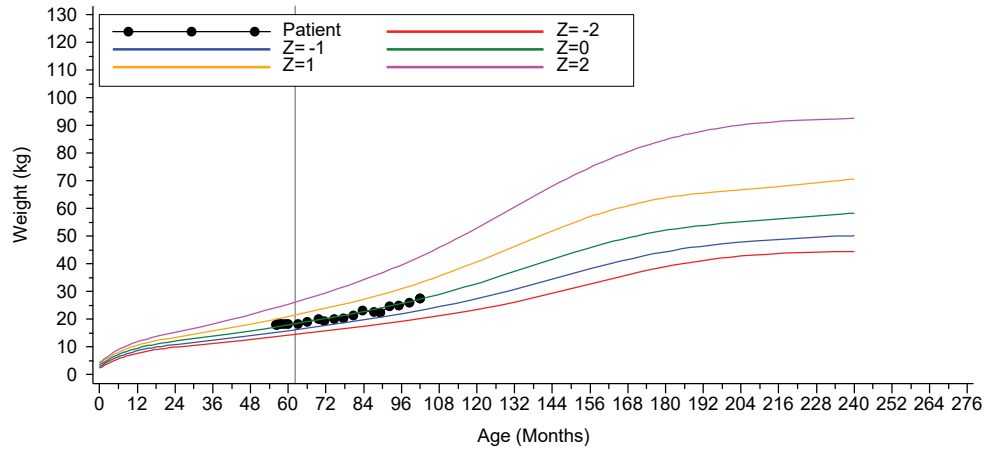

Patient 144  
Seizure History: Partial Onset Seizures

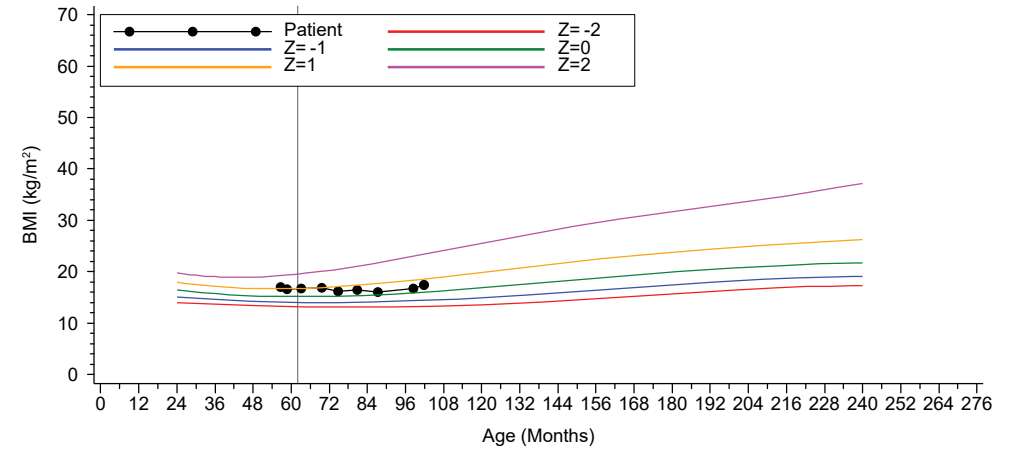

Patient 145  
Seizure History: Partial Onset Seizures

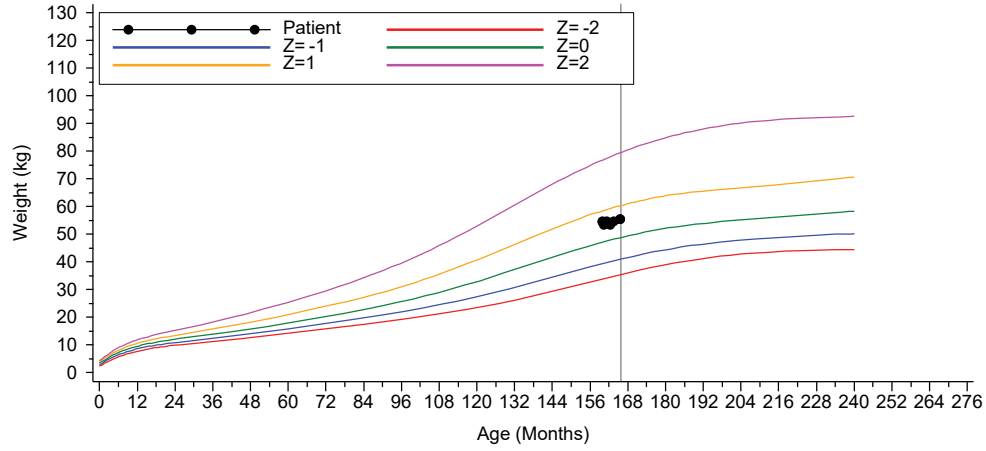

Patient 145  
Seizure History: Partial Onset Seizures

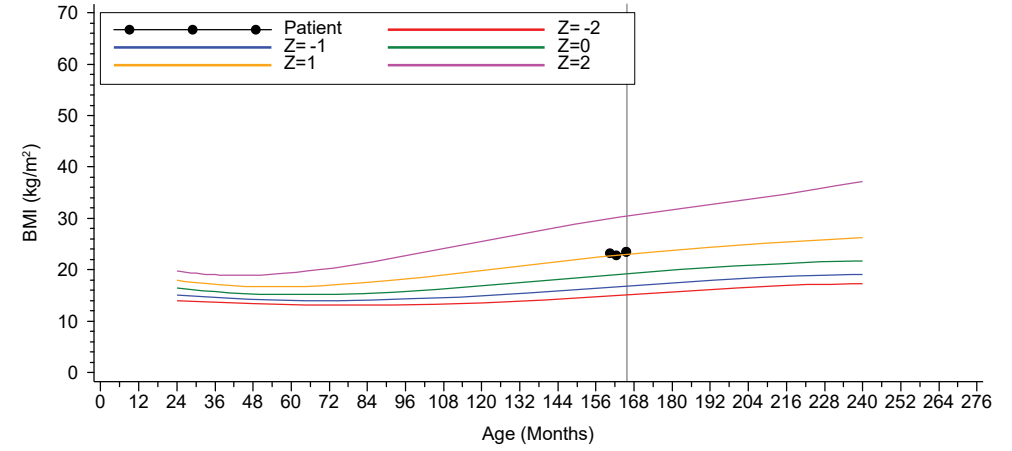

Patient 146  
Seizure History: Partial Onset Seizures

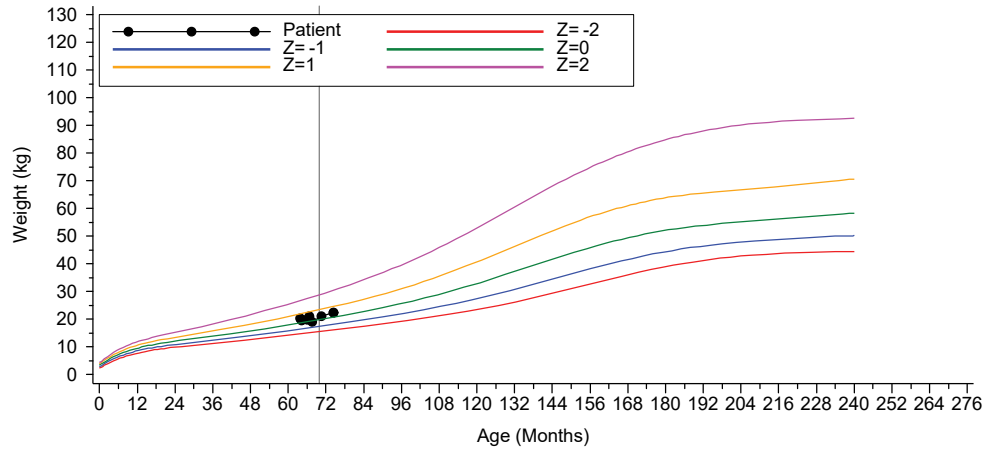

Patient 146  
Seizure History: Partial Onset Seizures

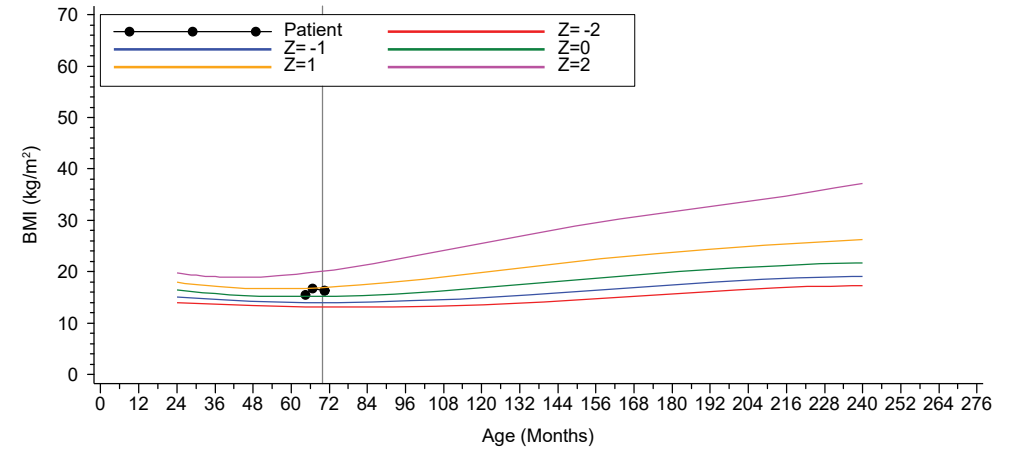

Patient 147  
Seizure History: Partial Onset Seizures

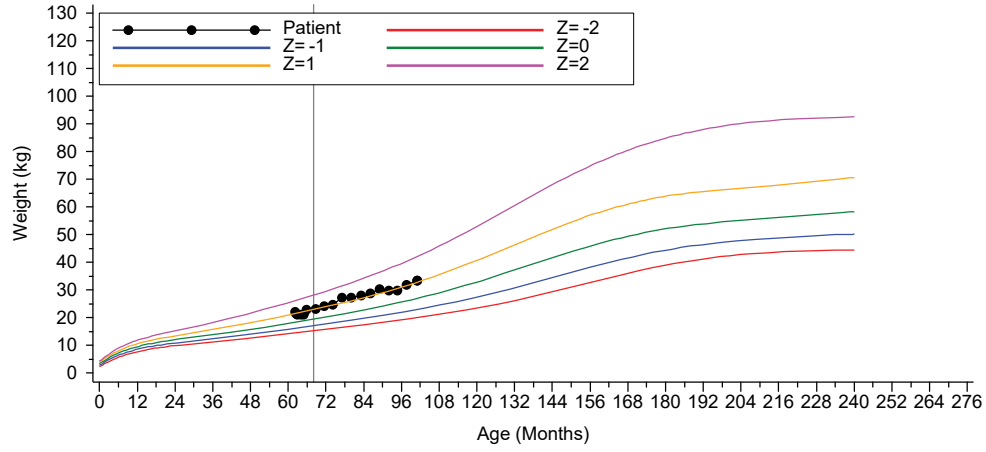

Patient 147  
Seizure History: Partial Onset Seizures

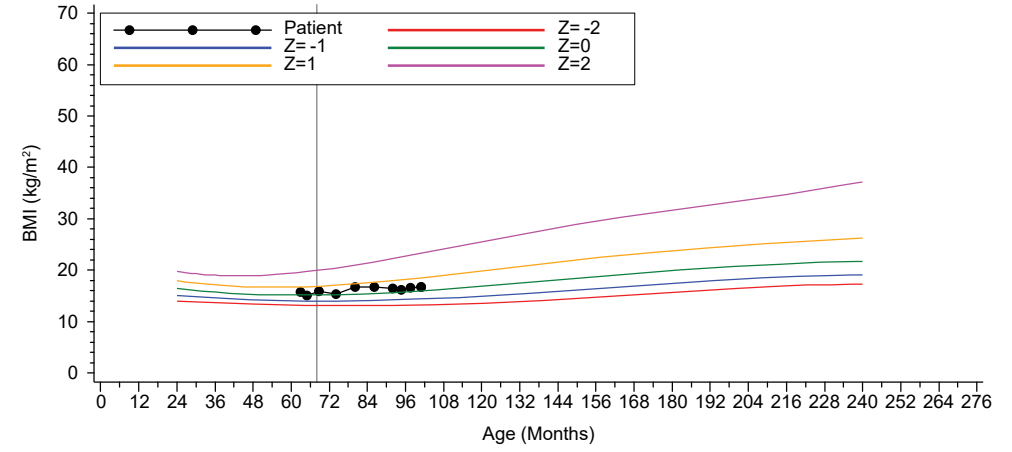

Patient 148  
Seizure History: Partial Onset Seizures

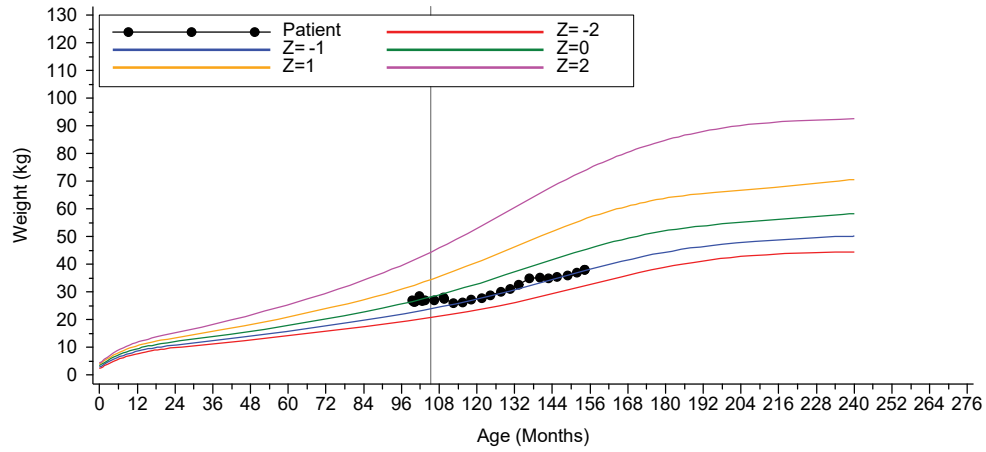

Patient 148  
Seizure History: Partial Onset Seizures

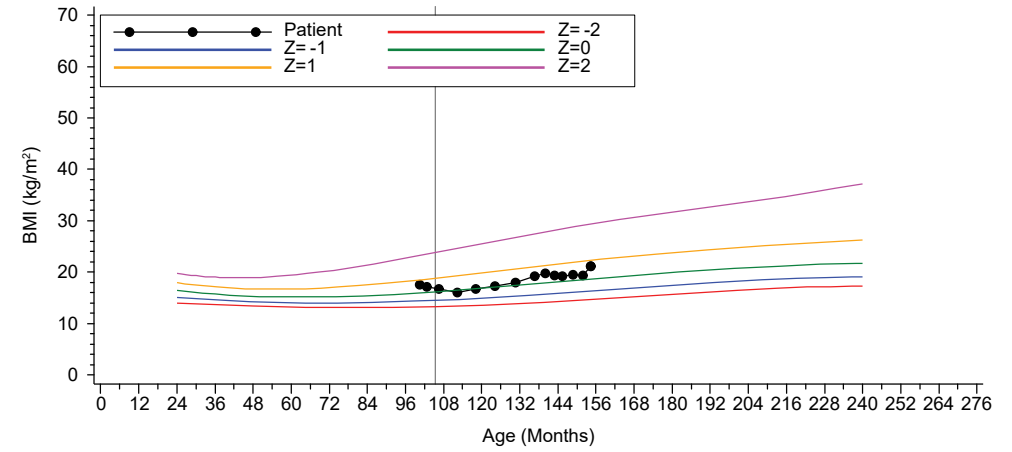

Patient 149  
Seizure History: Partial Onset Seizures

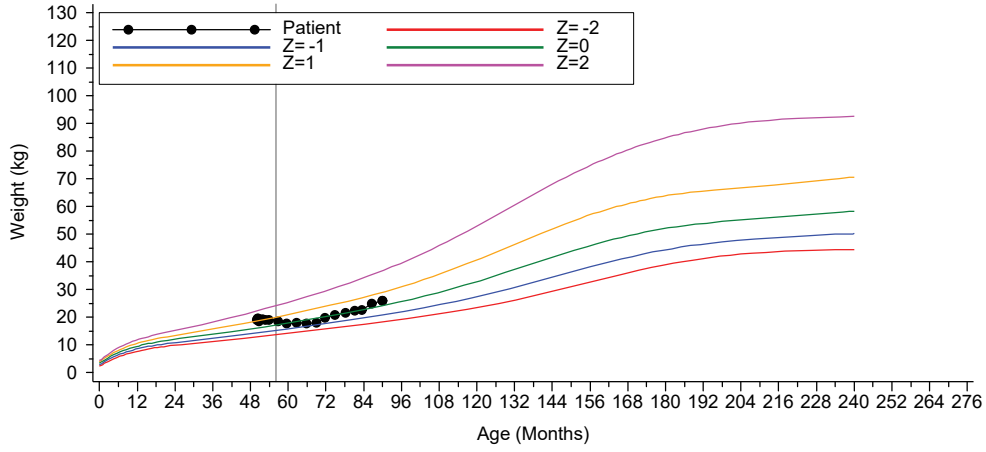

Patient 149  
Seizure History: Partial Onset Seizures

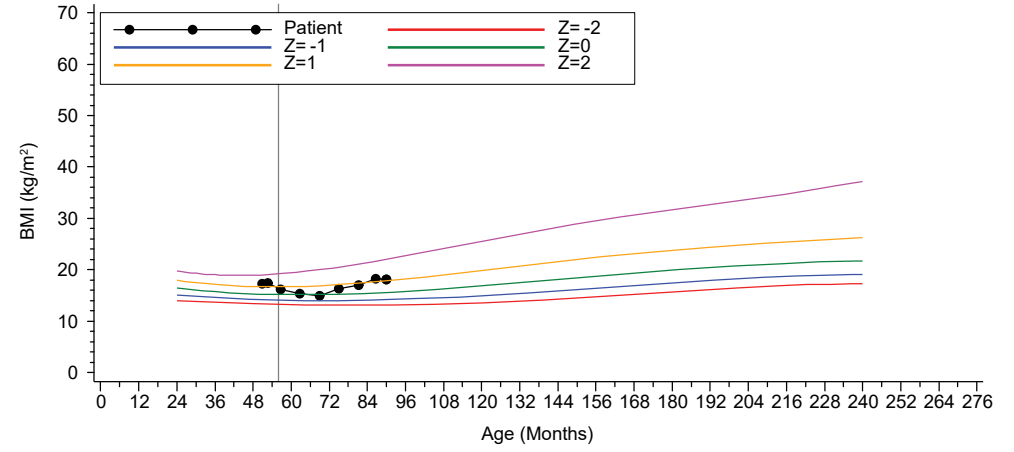

Patient 150  
Seizure History: Partial Onset Seizures

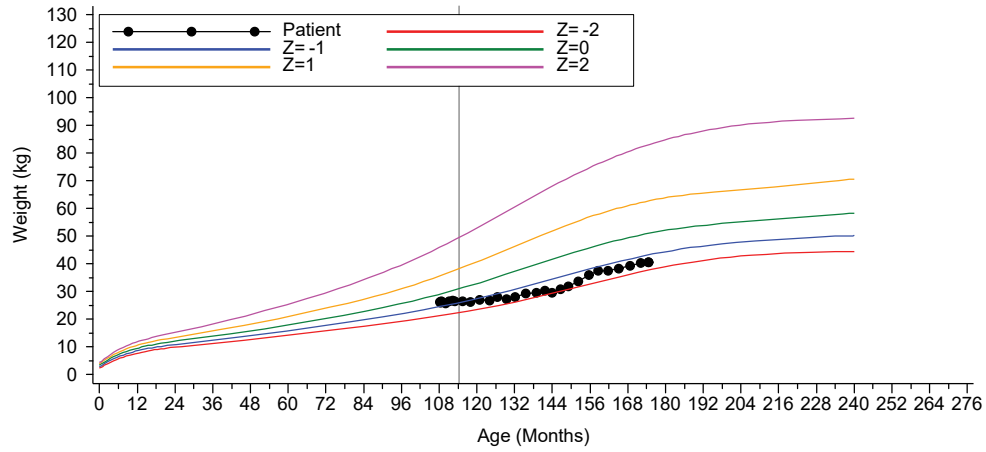

Patient 150  
Seizure History: Partial Onset Seizures

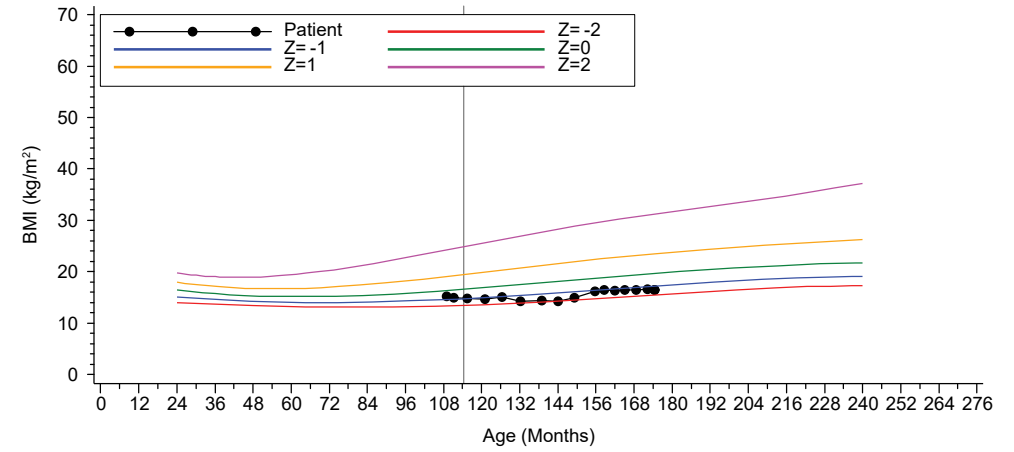

Patient 151  
Seizure History: Partial Onset Seizures

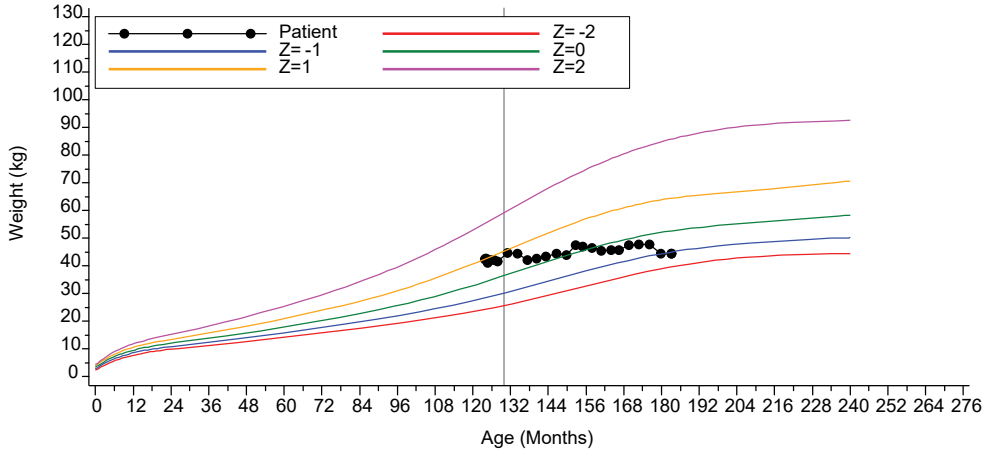

Patient 151  
Seizure History: Partial Onset Seizures

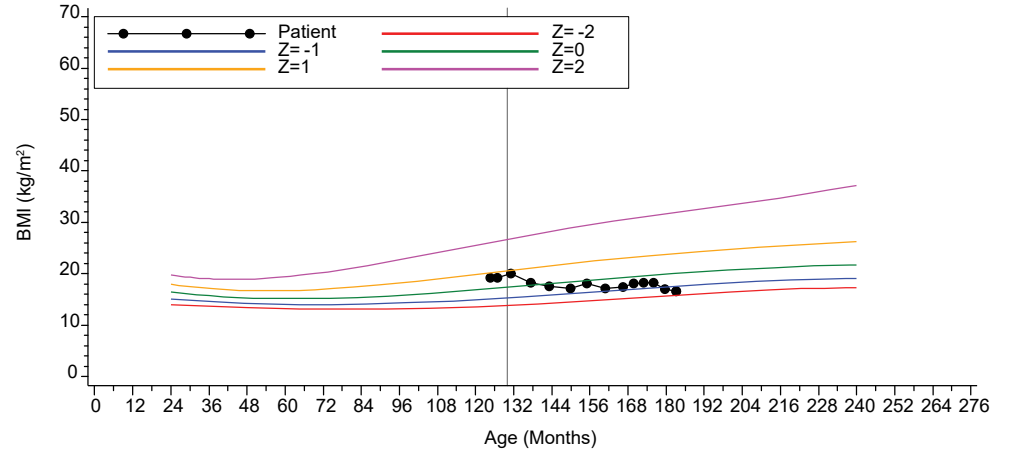

Patient 152  
Seizure History: Partial Onset Seizures

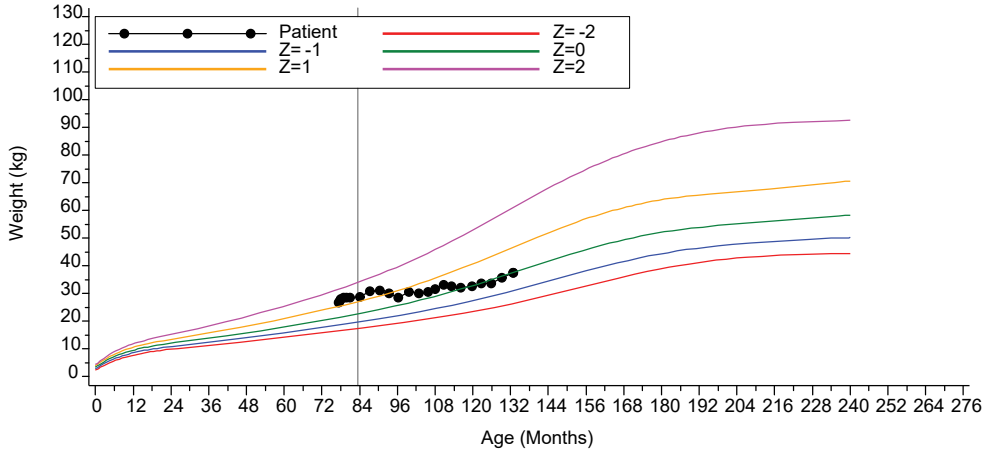

Patient 152  
Seizure History: Partial Onset Seizures

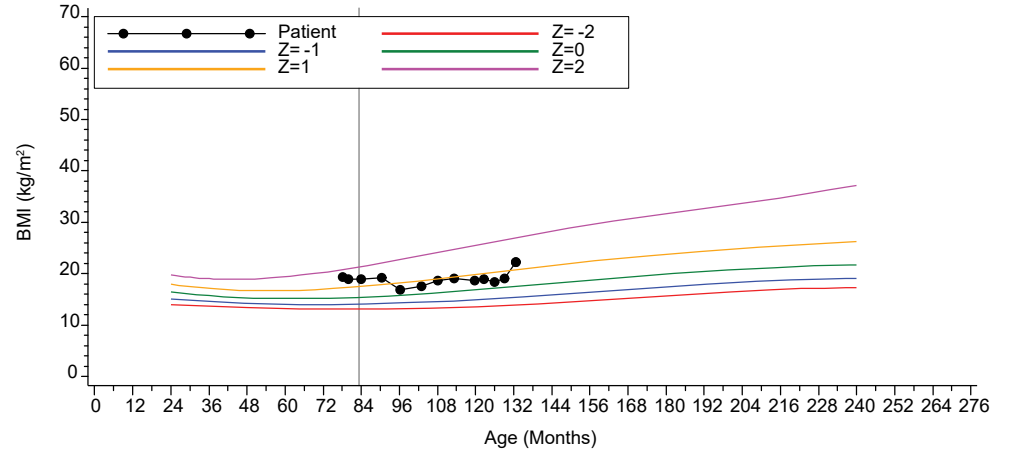

Patient 153  
Seizure History: Partial Onset Seizures

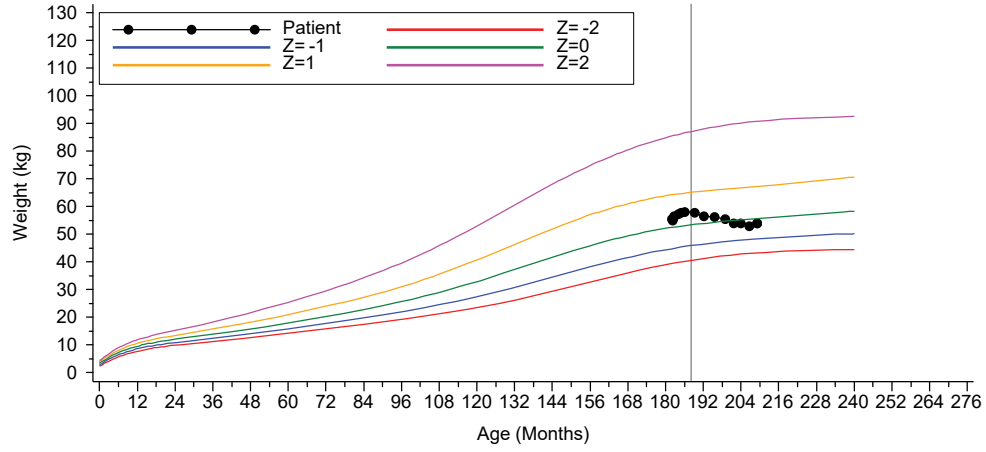

Patient 153  
Seizure History: Partial Onset Seizures

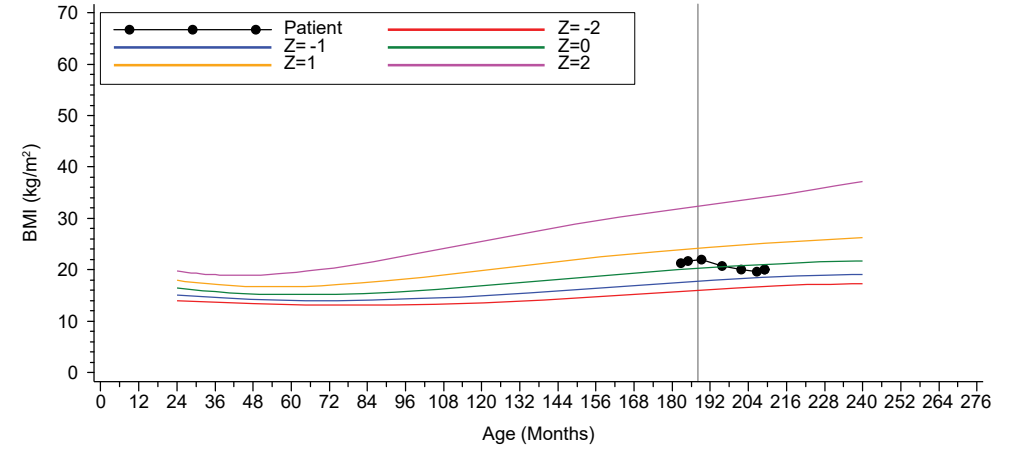

Patient 154  
Seizure History: Partial Onset Seizures

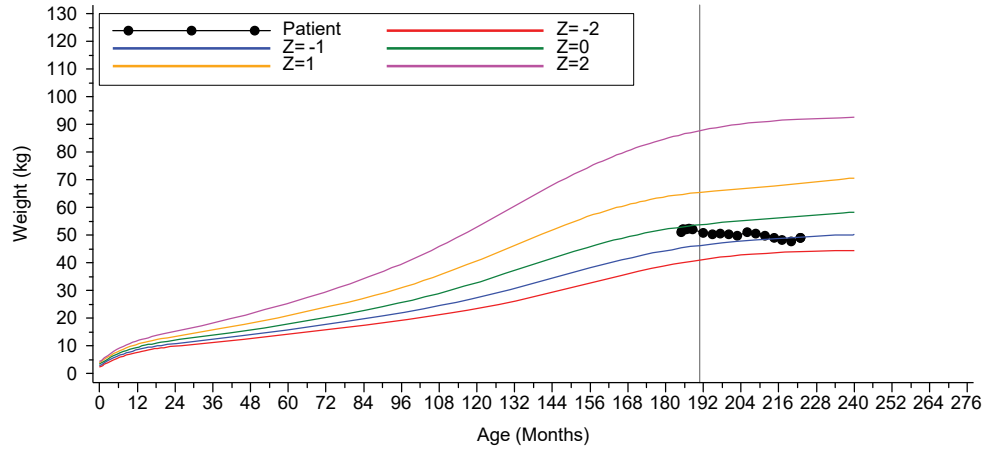

Patient 154  
Seizure History: Partial Onset Seizures

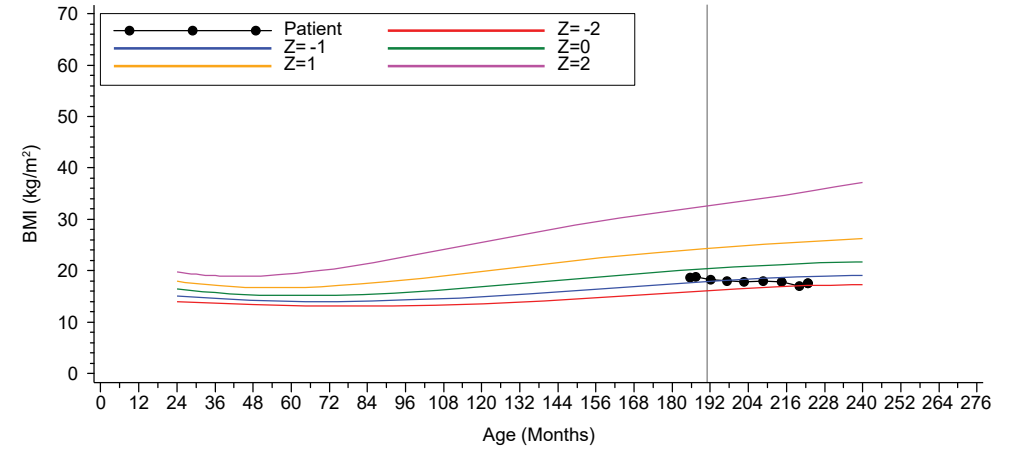

Patient 155  
Seizure History: Partial Onset Seizures

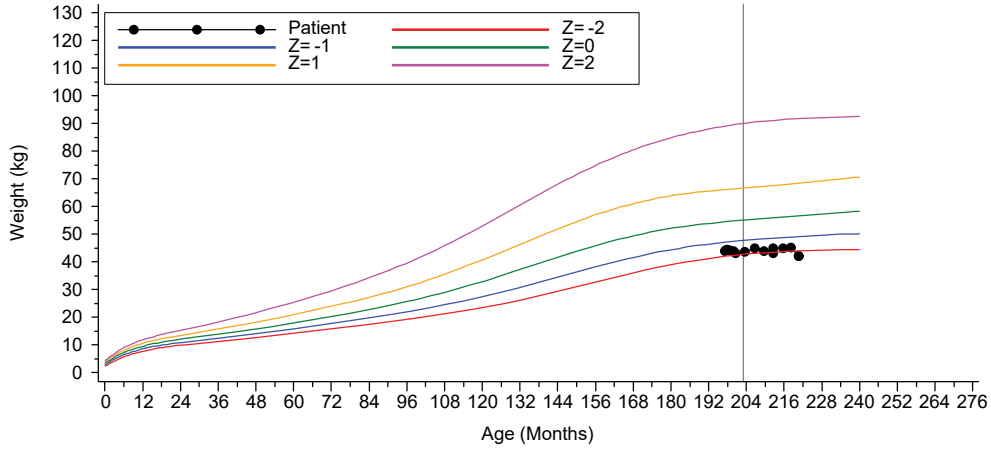

Patient 155  
Seizure History: Partial Onset Seizures

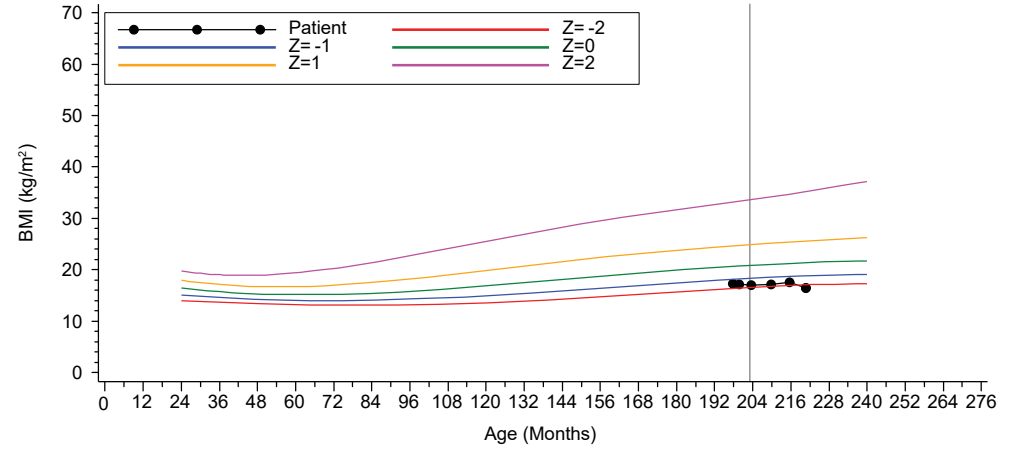

Patient 156  
Seizure History: Partial Onset Seizures

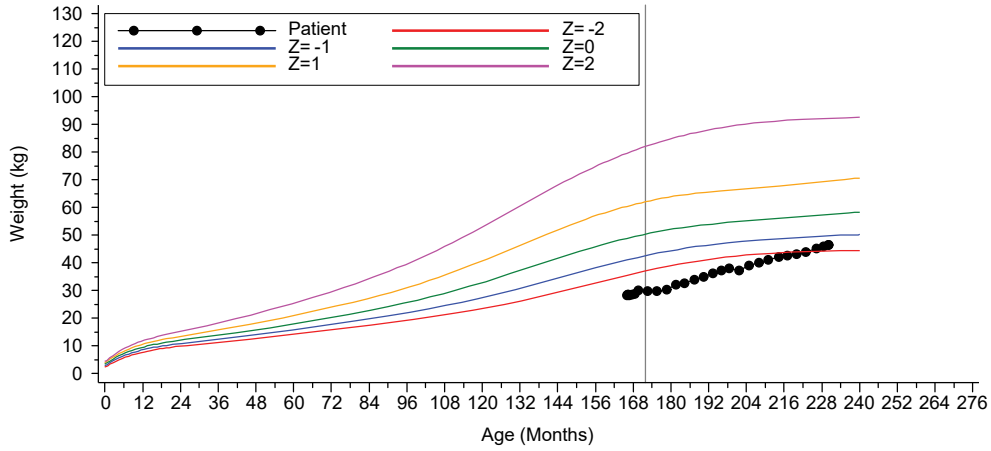

Patient 156  
Seizure History: Partial Onset Seizures

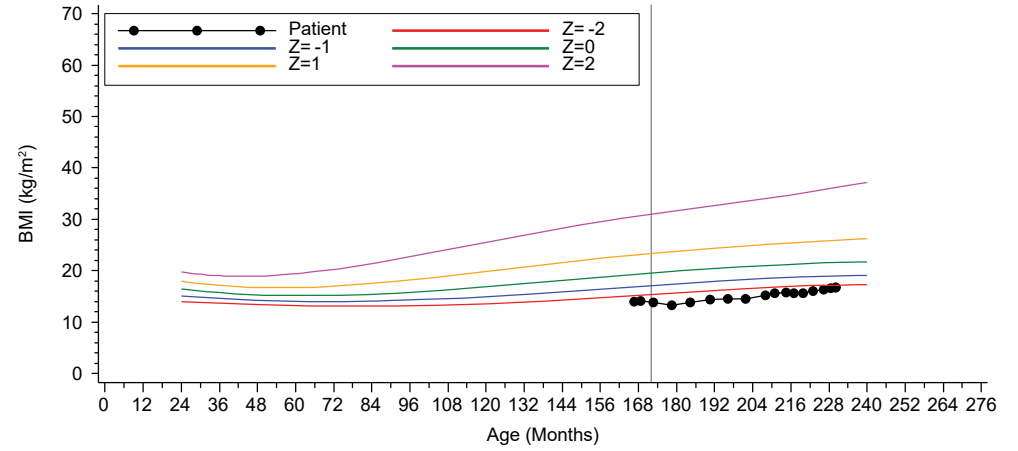

Patient 157  
Seizure History: Partial Onset Seizures

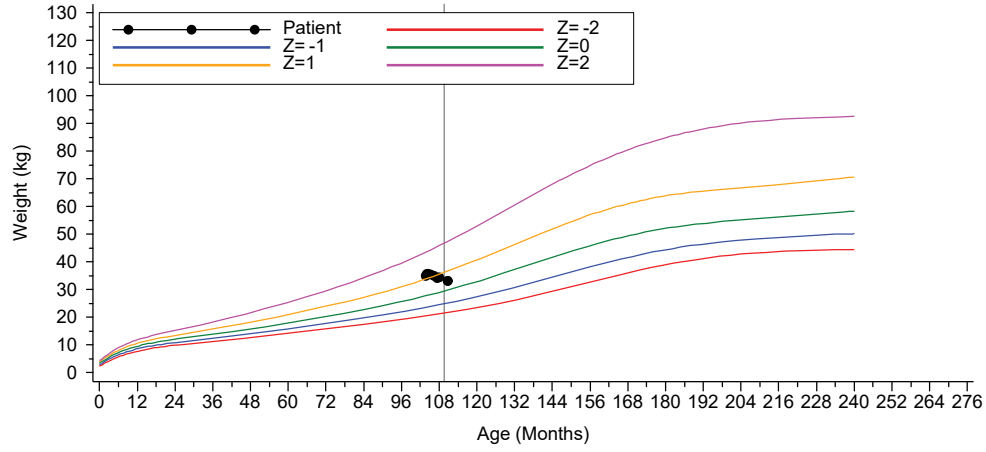

Patient 157  
Seizure History: Partial Onset Seizures

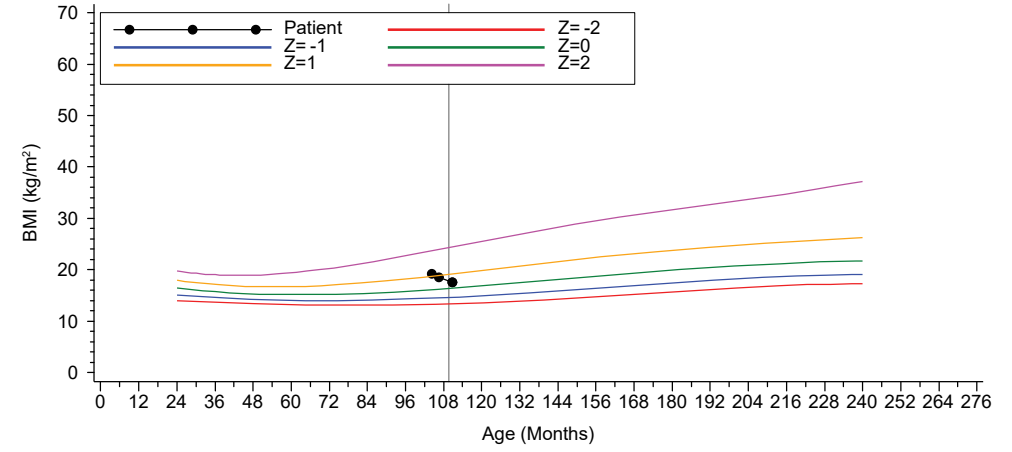

Patient 158  
Seizure History: Partial Onset Seizures

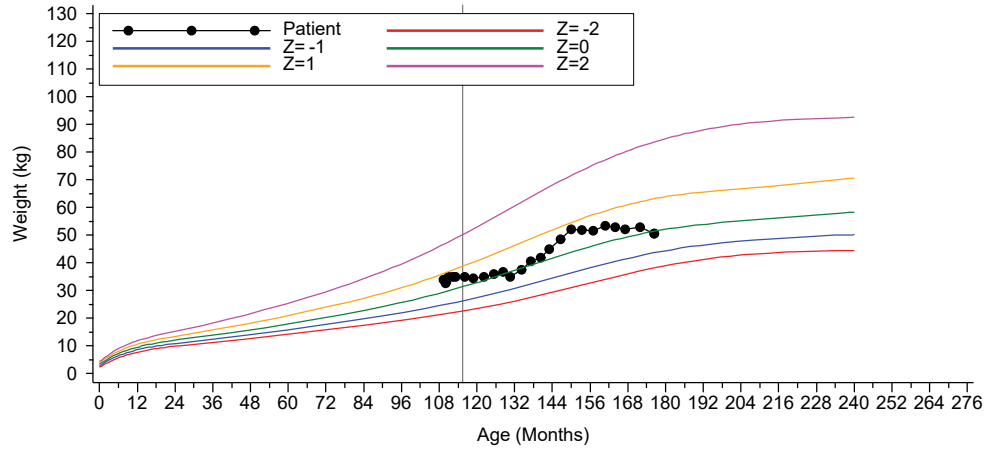

Patient 158  
Seizure History: Partial Onset Seizures

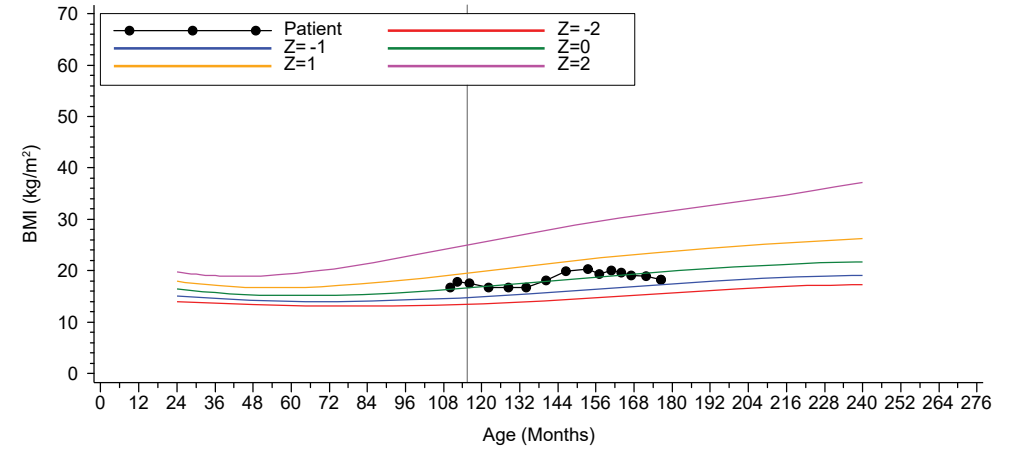



Patient 159  
Seizure History: Partial Onset Seizures

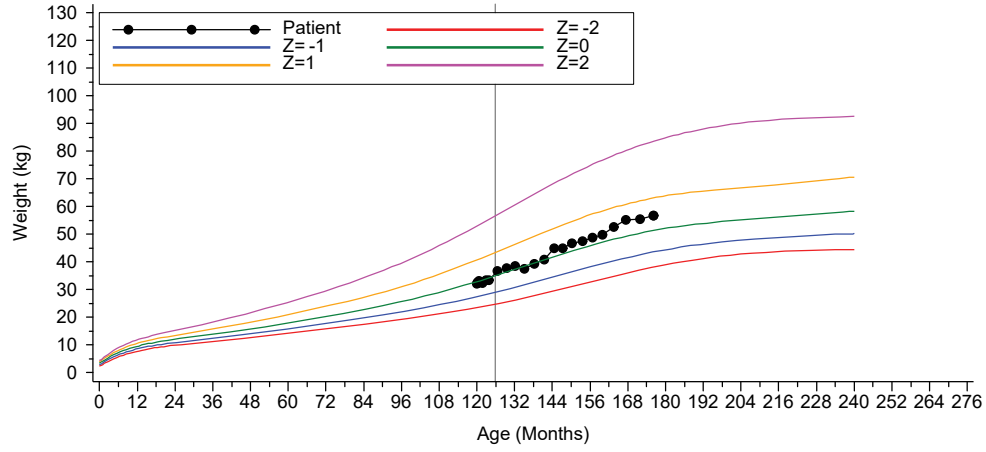

Patient 159  
Seizure History: Partial Onset Seizures

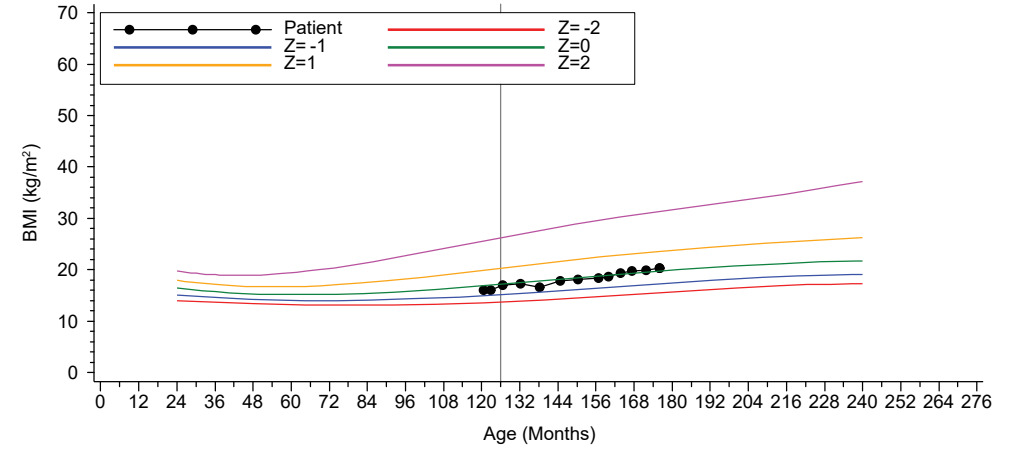

Patient 160  
Seizure History: Partial Onset Seizures

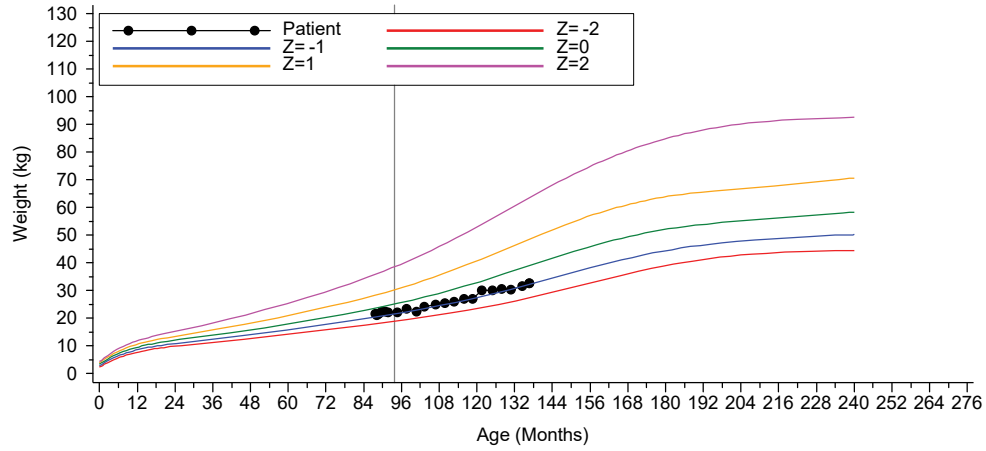

Patient 160  
Seizure History: Partial Onset Seizures

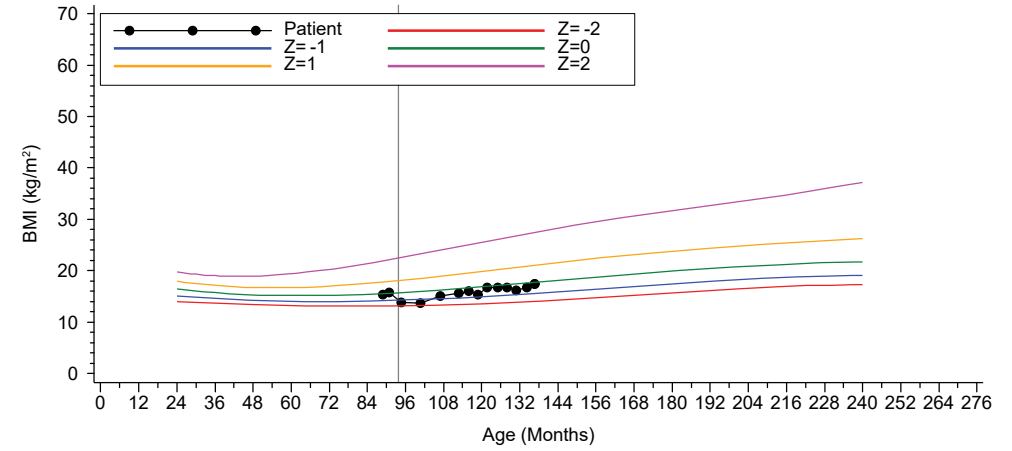

Patient 161  
Seizure History: Partial Onset Seizures

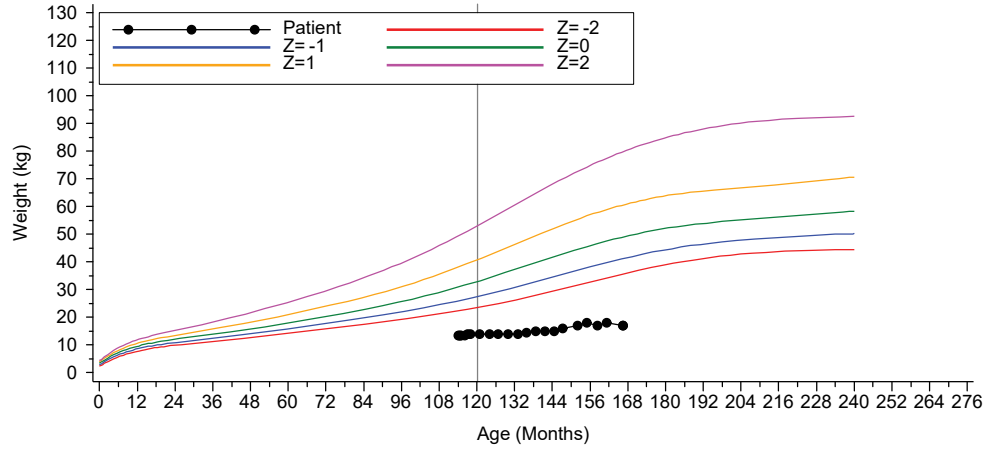

Patient 161  
Seizure History: Partial Onset Seizures

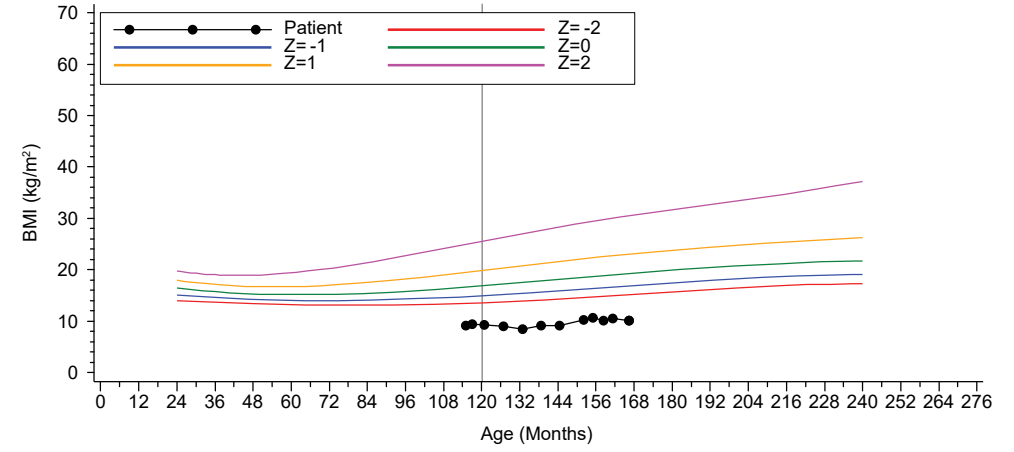

Patient 162  
Seizure History: Partial Onset Seizures

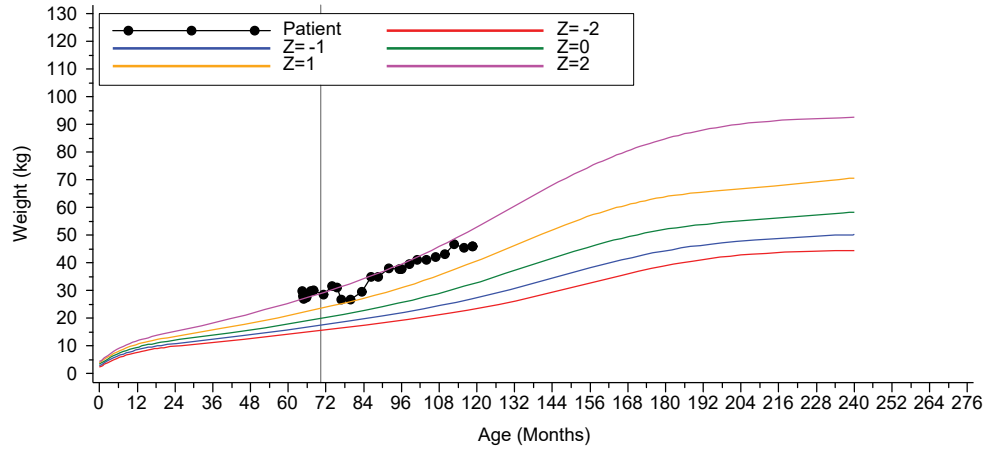

Patient 162  
Seizure History: Partial Onset Seizures

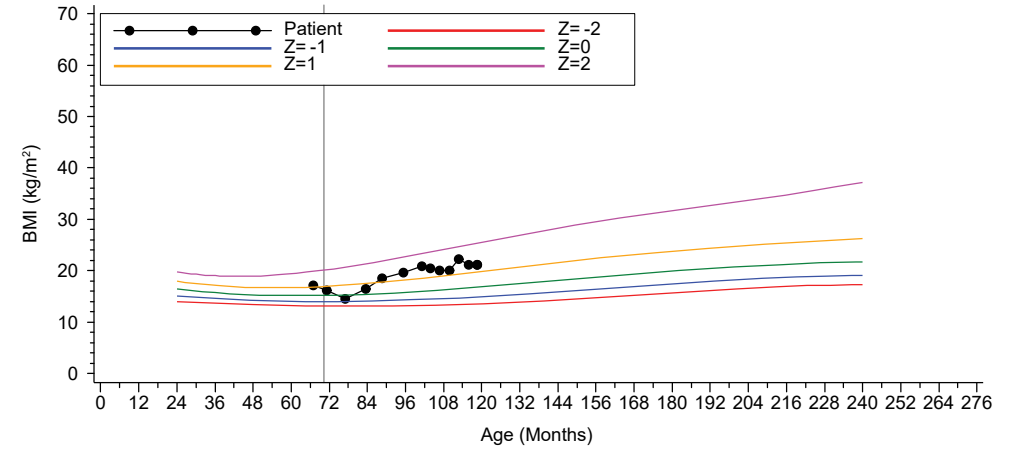

Patient 163  
Seizure History: Partial Onset Seizures

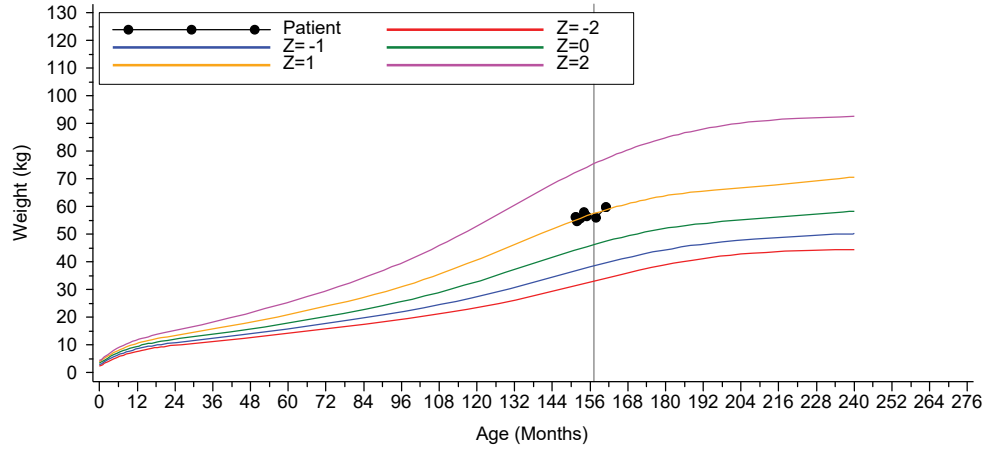

Patient 163  
Seizure History: Partial Onset Seizures

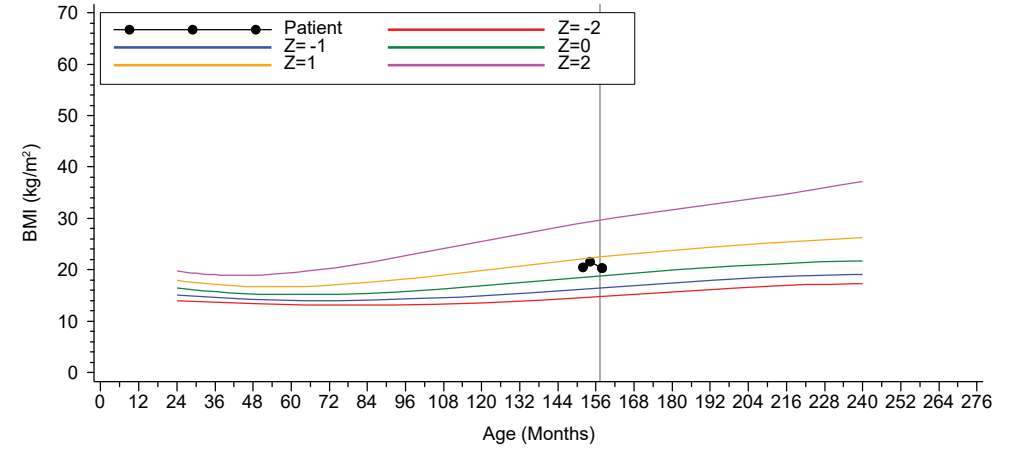

Patient 164  
Seizure History: Partial Onset Seizures

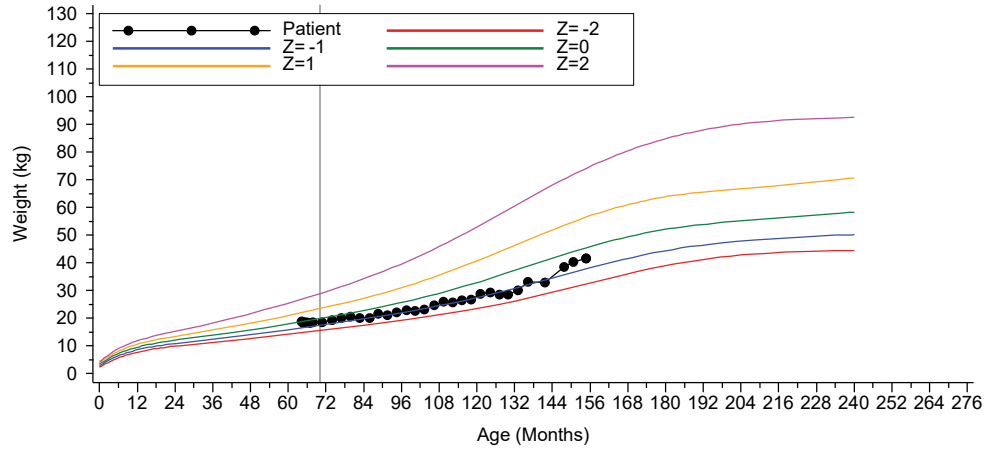

Patient 164  
Seizure History: Partial Onset Seizures

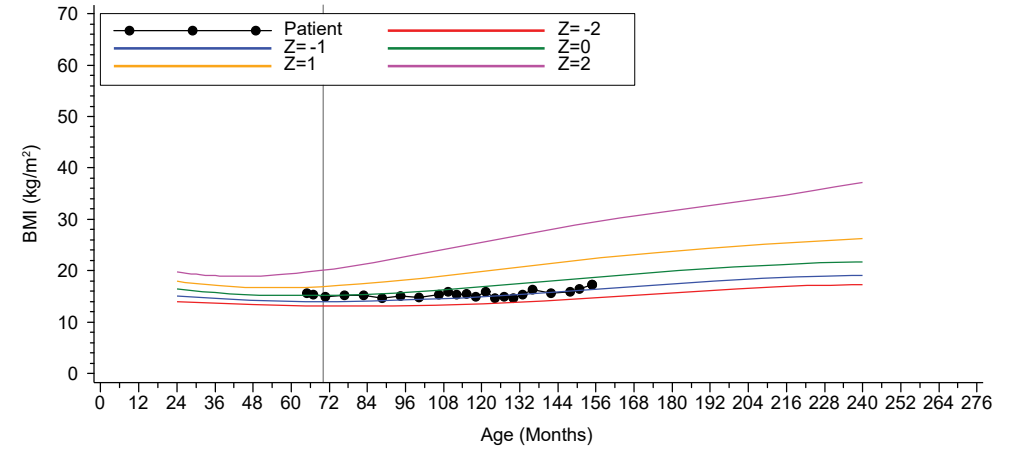

Patient 165  
Seizure History: Partial Onset Seizures

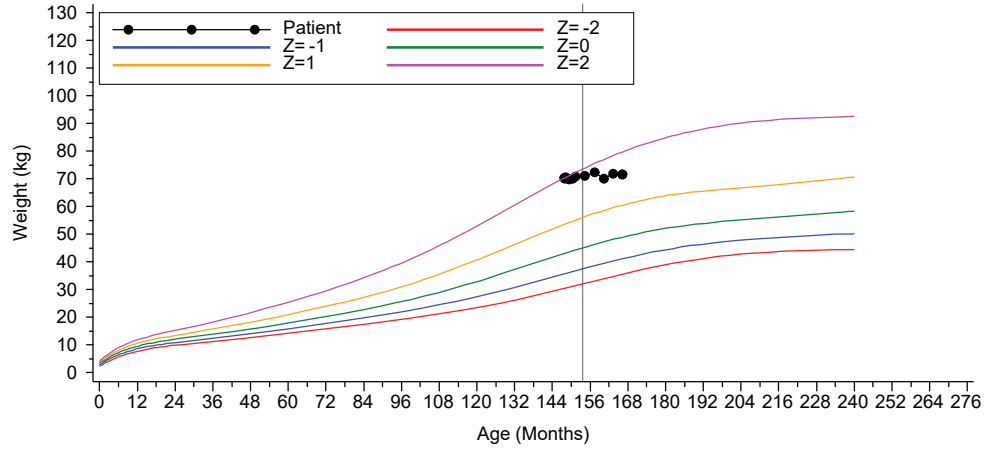

Patient 165  
Seizure History: Partial Onset Seizures

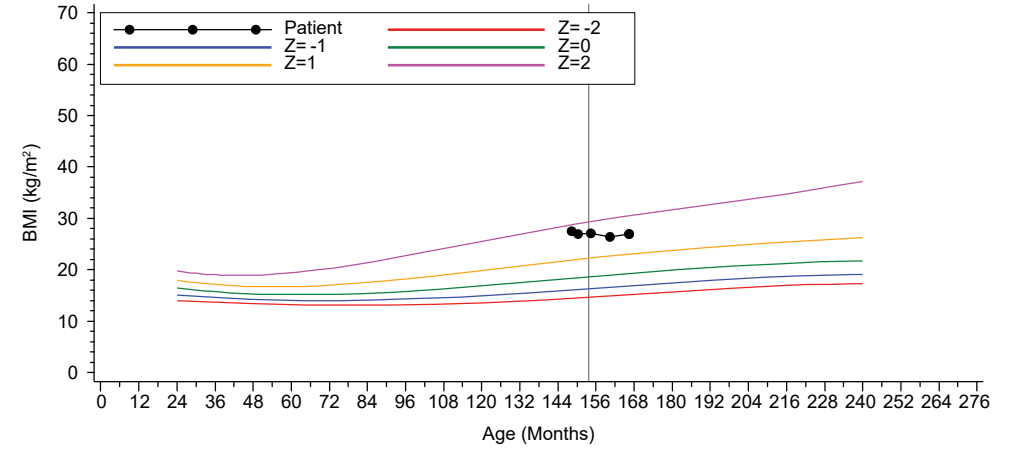

Patient 166  
Seizure History: Partial Onset Seizures

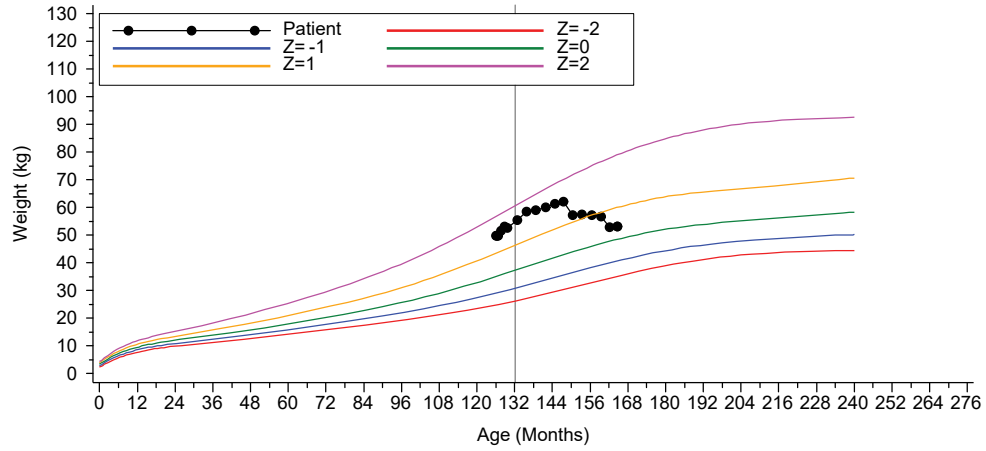

Patient 166  
Seizure History: Partial Onset Seizures

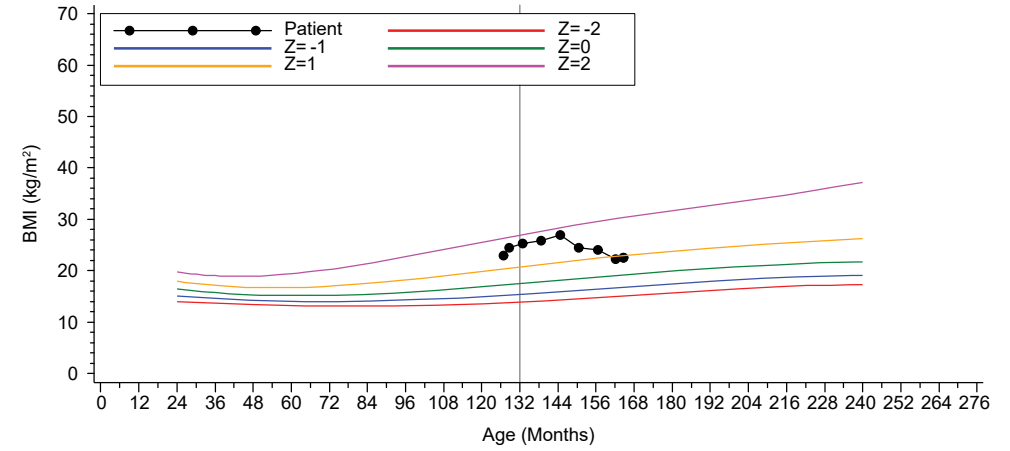

Patient 167  
Seizure History: Partial Onset Seizures

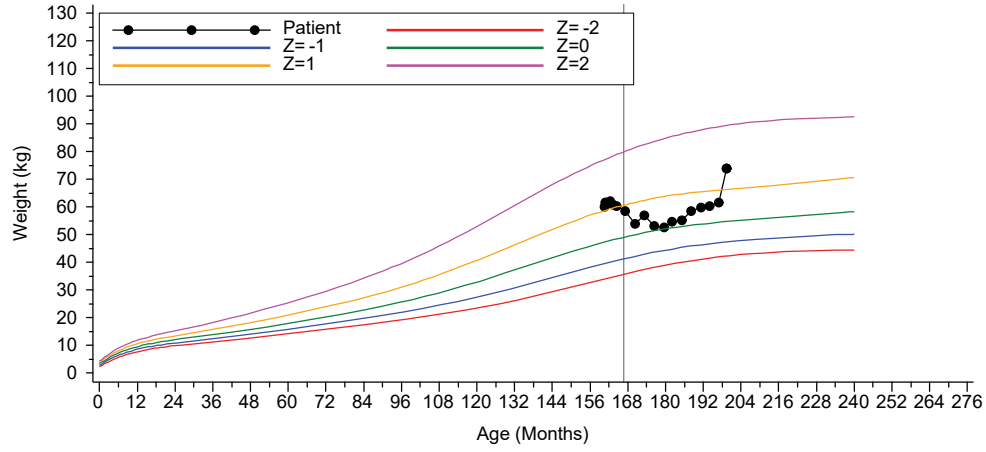

Patient 167  
Seizure History: Partial Onset Seizures

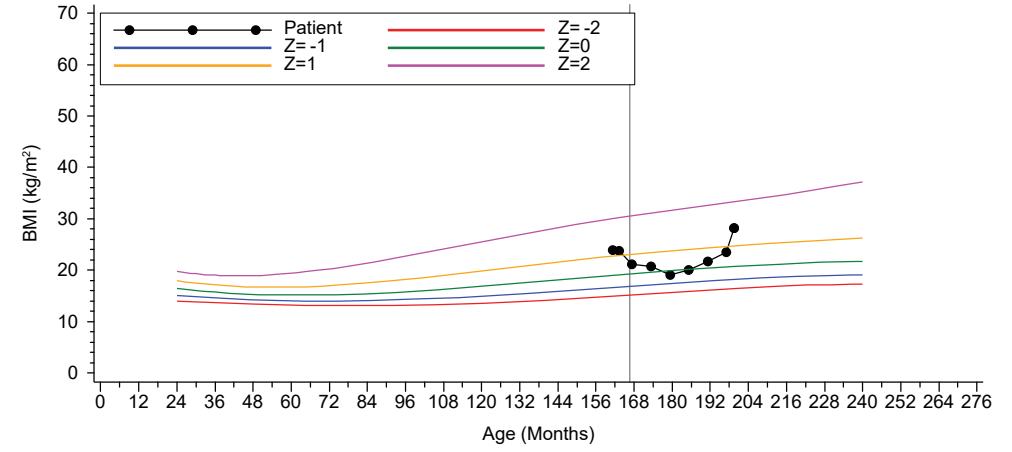

Patient 168  
Seizure History: Partial Onset Seizures

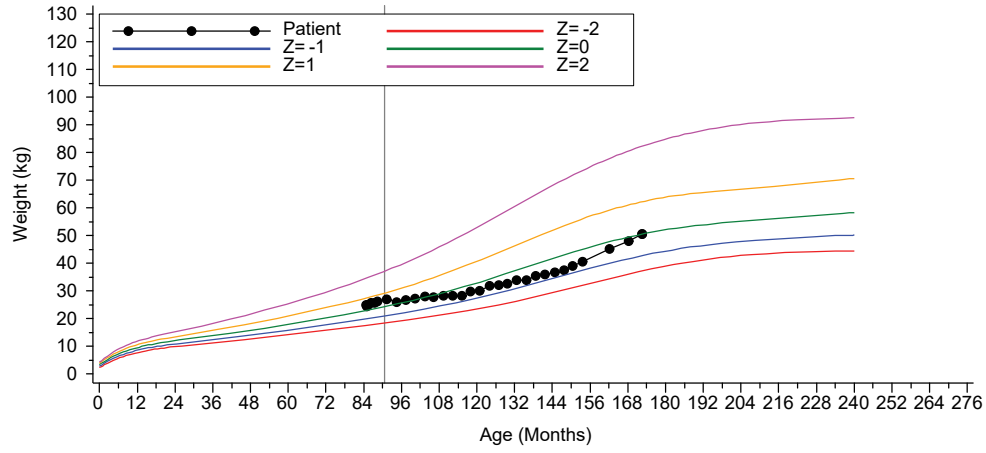

Patient 168  
Seizure History: Partial Onset Seizures

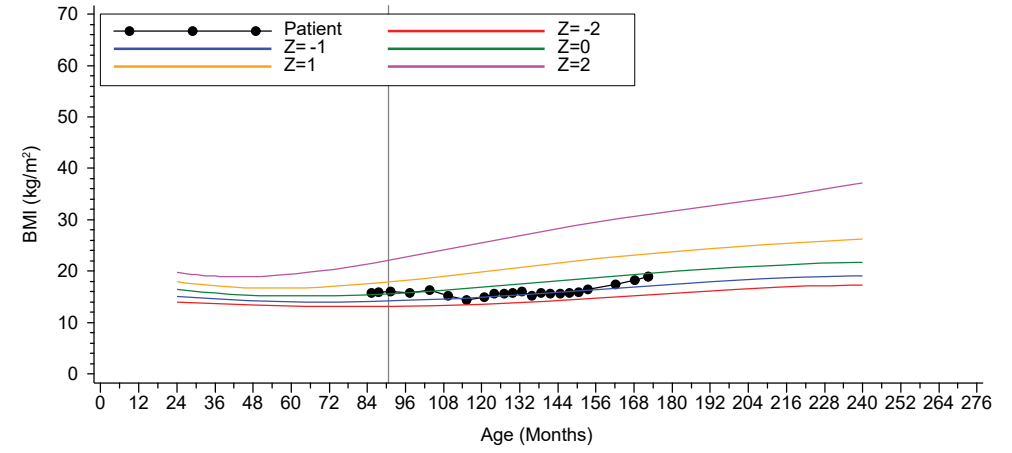

Patient 169  
Seizure History: Partial Onset Seizures

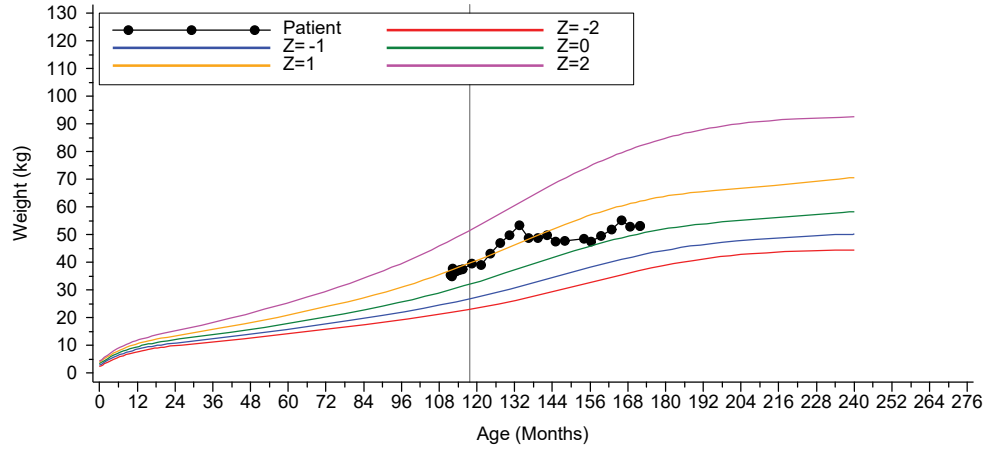

Patient 169  
Seizure History: Partial Onset Seizures

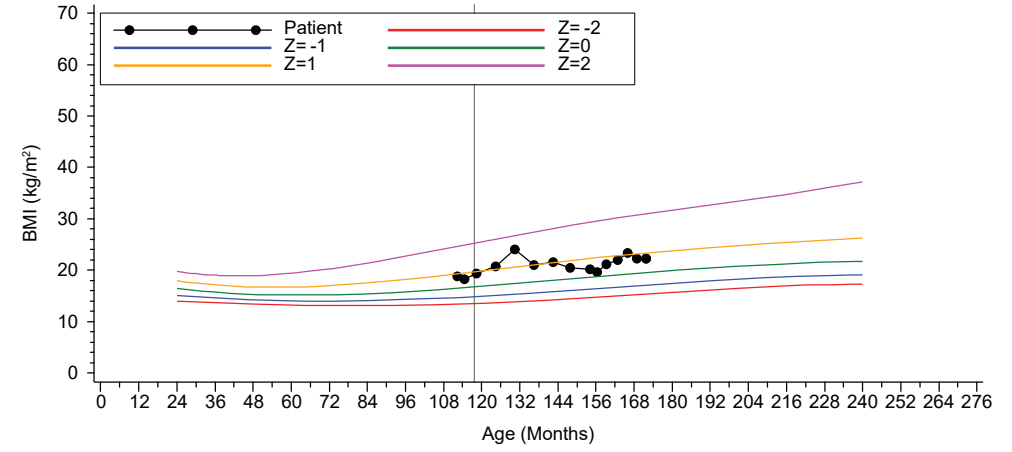

Patient 170  
Seizure History: Partial Onset Seizures

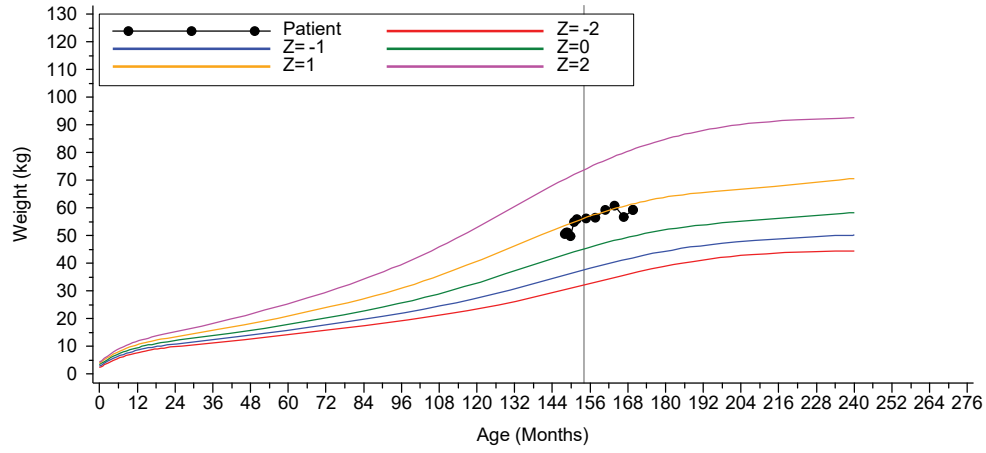

Patient 170  
Seizure History: Partial Onset Seizures

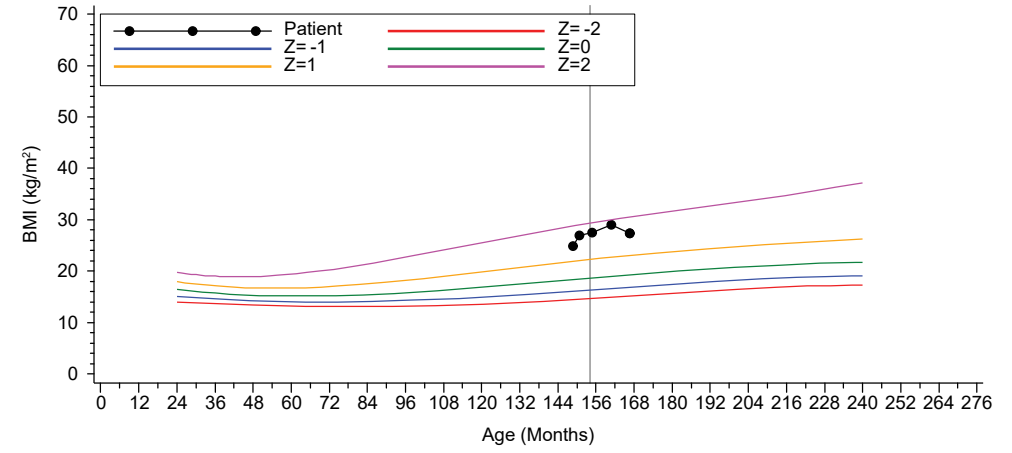

Patient 171  
Seizure History: Partial Onset Seizures

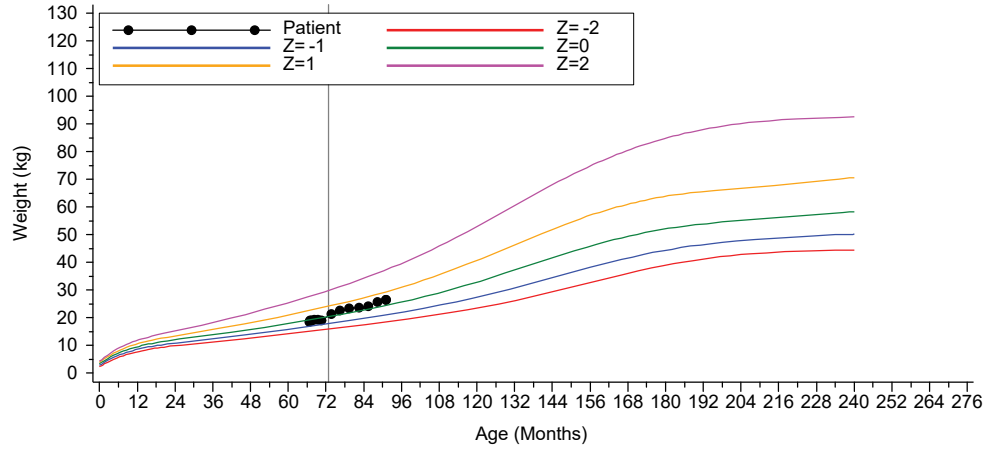

Patient 171  
Seizure History: Partial Onset Seizures

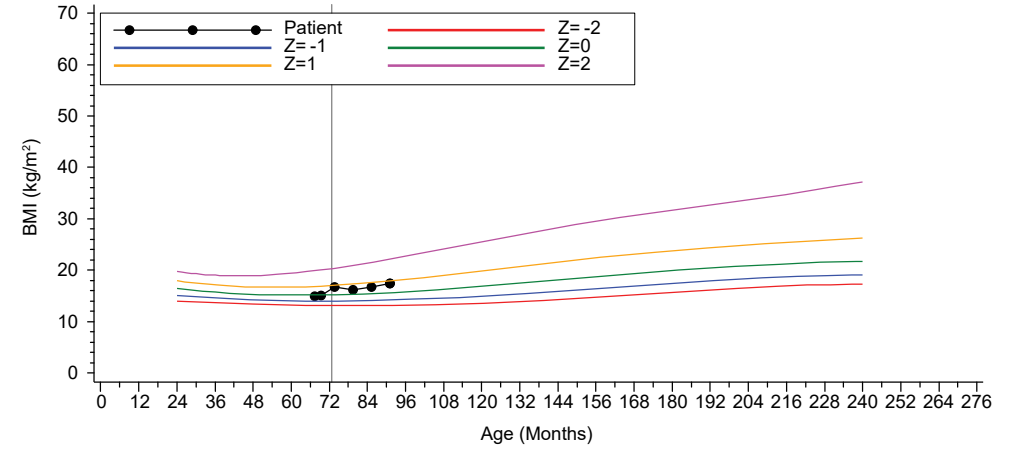

Patient 172  
Seizure History: Partial Onset Seizures

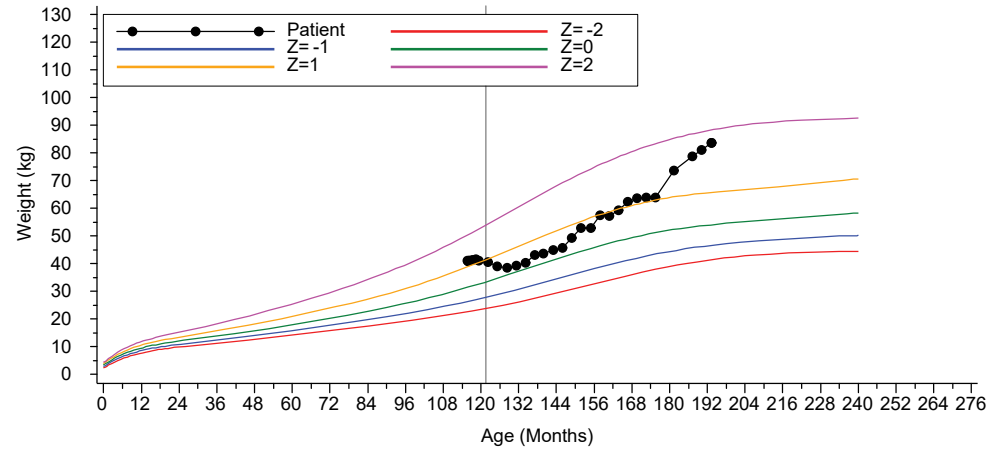

Patient 172  
Seizure History: Partial Onset Seizures

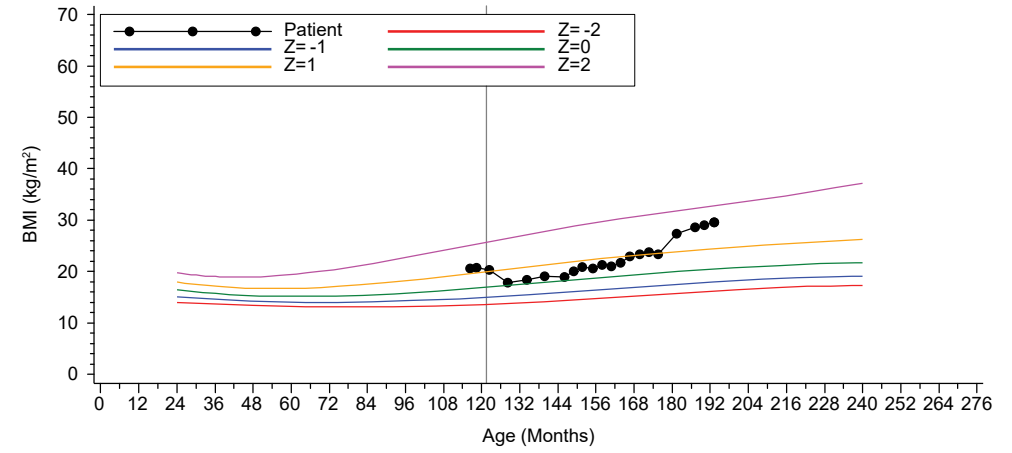

Patient 173  
Seizure History: Partial Onset Seizures

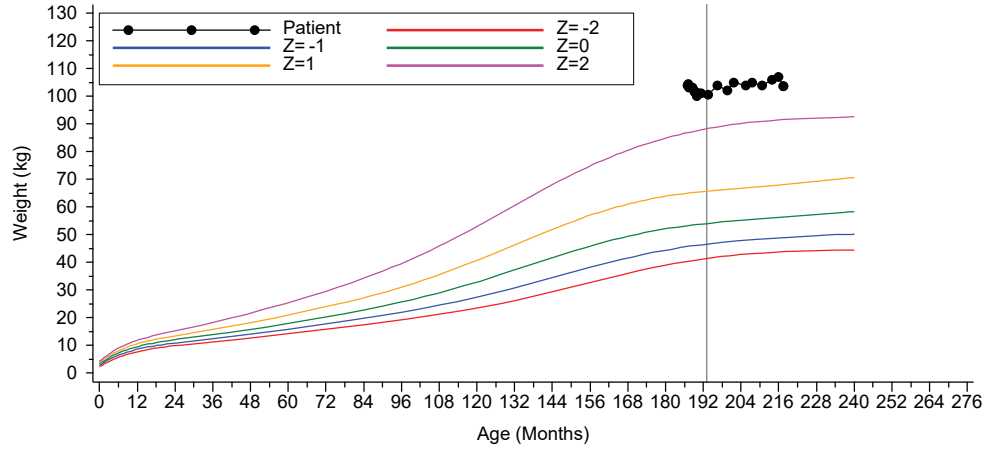

Patient 173  
Seizure History: Partial Onset Seizures

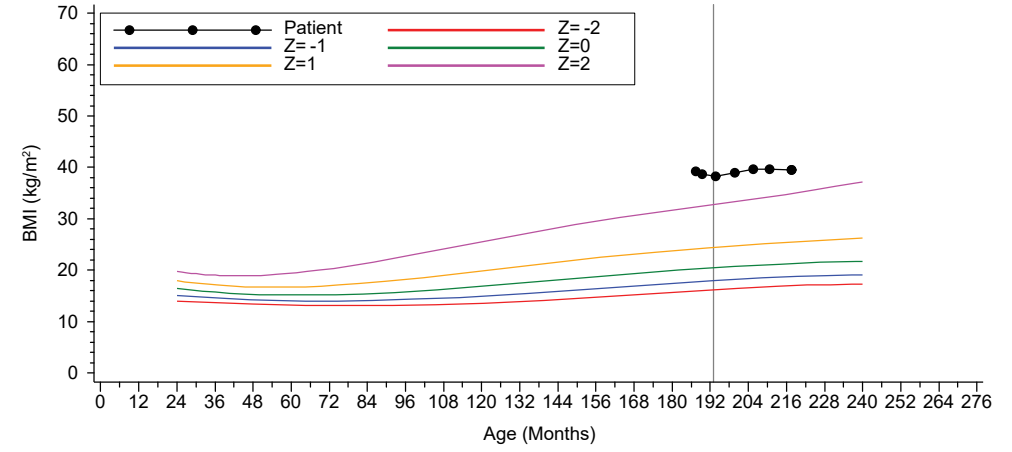

Patient 174  
Seizure History: Partial Onset Seizures

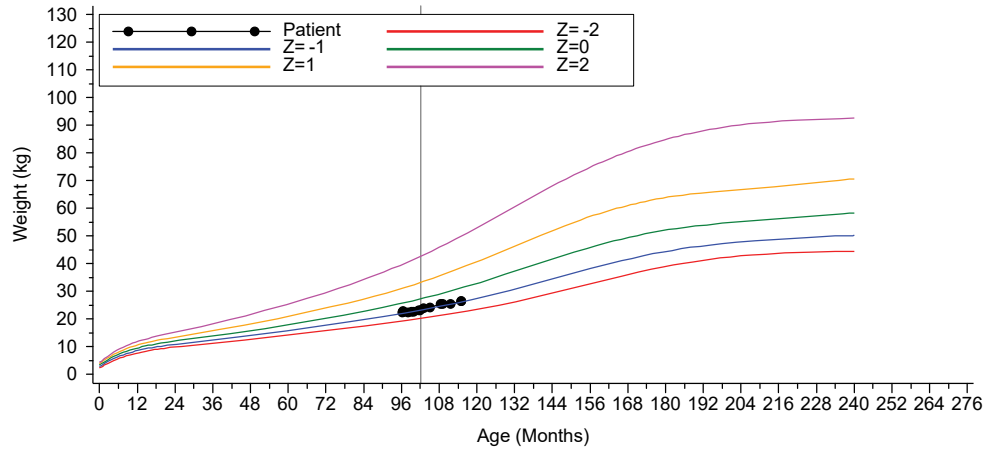

Patient 174  
Seizure History: Partial Onset Seizures

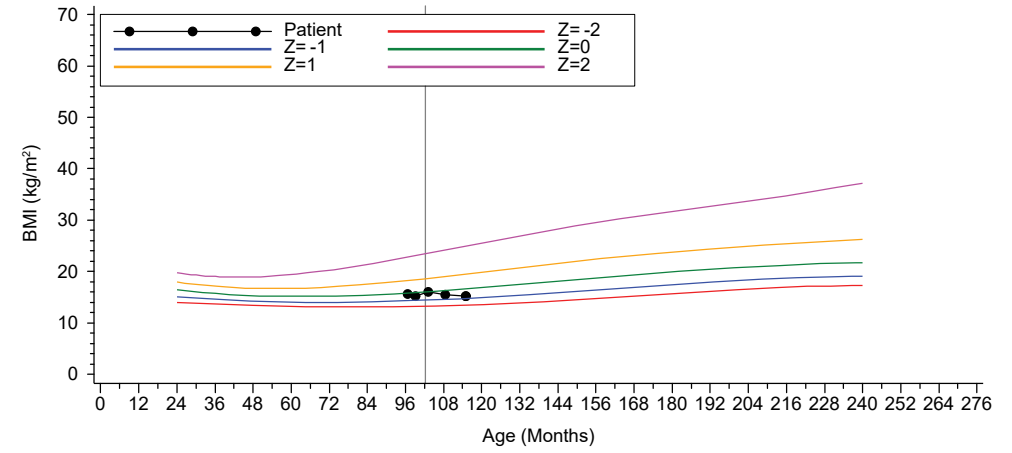



Patient 175  
Seizure History: Partial Onset Seizures

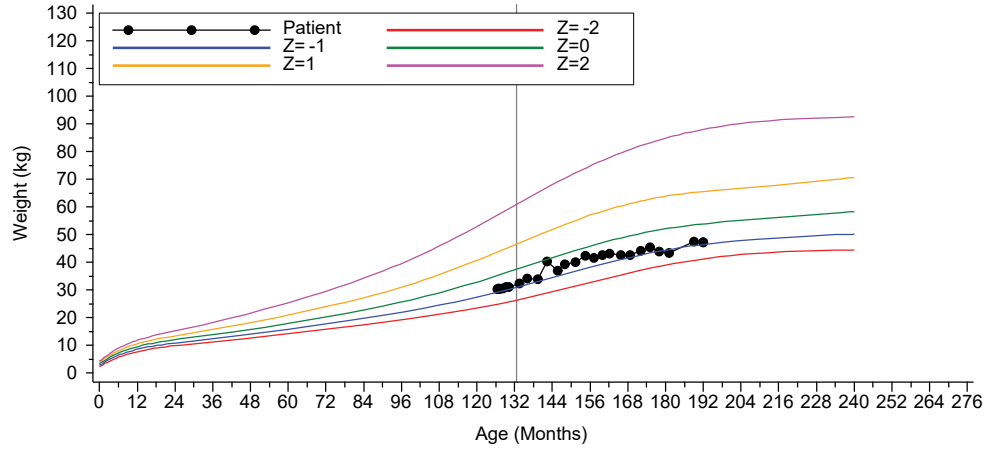

Patient 175  
Seizure History: Partial Onset Seizures

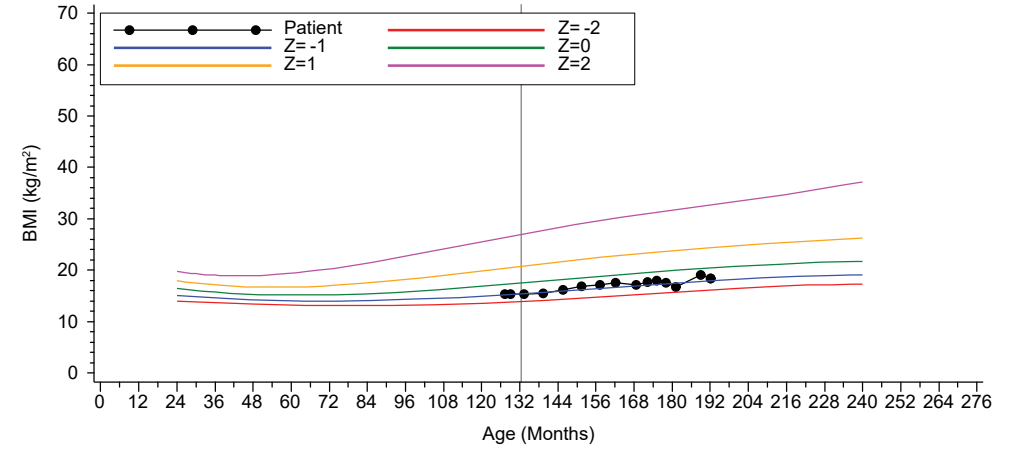

Patient 176  
Seizure History: Partial Onset Seizures

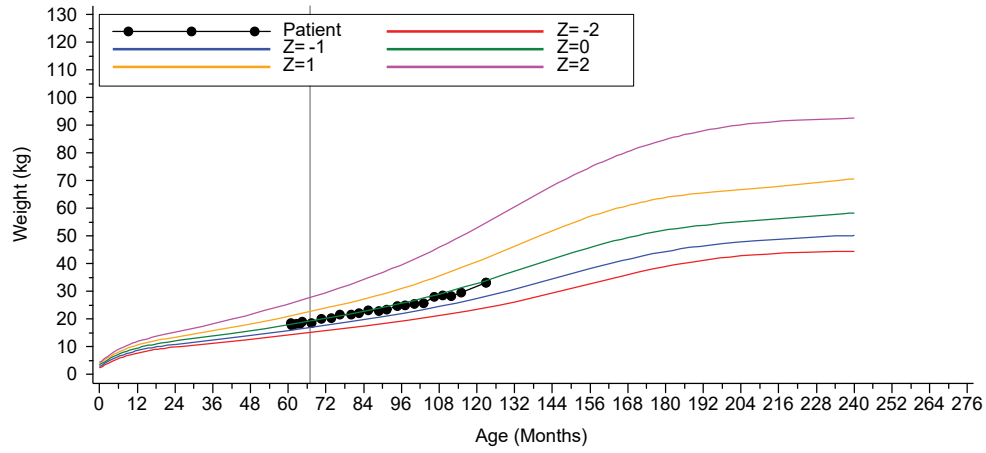

Patient 176  
Seizure History: Partial Onset Seizures

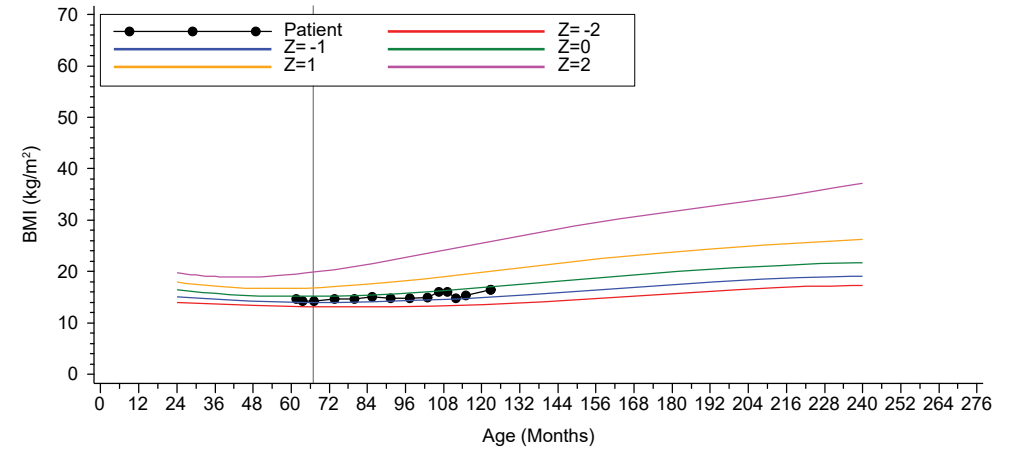

Patient 177  
Seizure History: Partial Onset Seizures

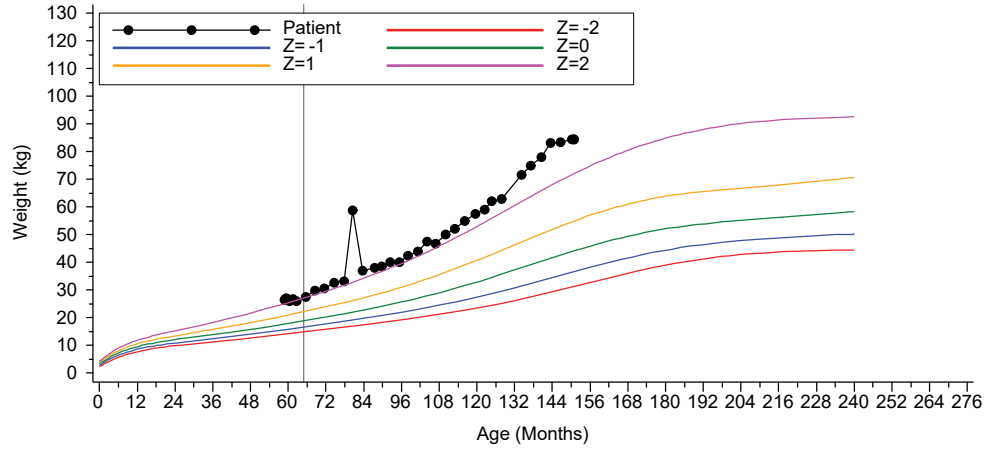

Patient 177  
Seizure History: Partial Onset Seizures

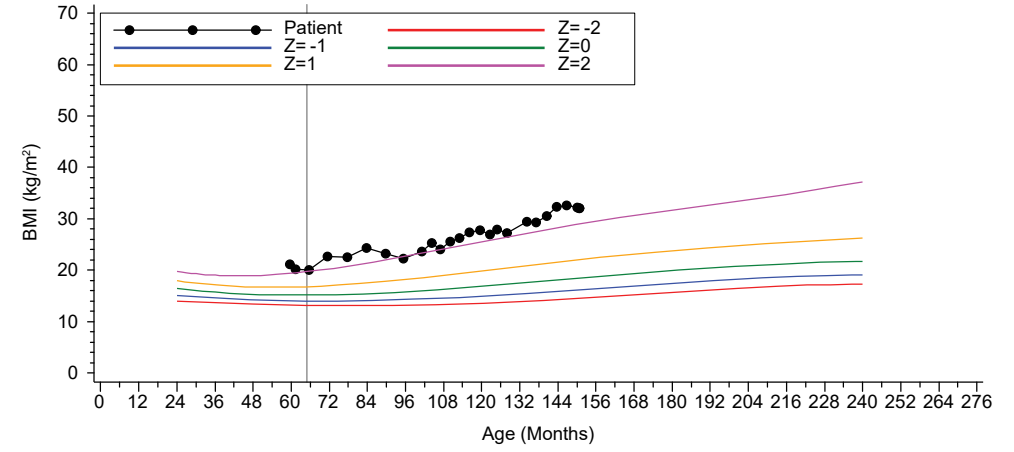

Patient 178  
Seizure History: Primary Generalized Seizures and Unknown

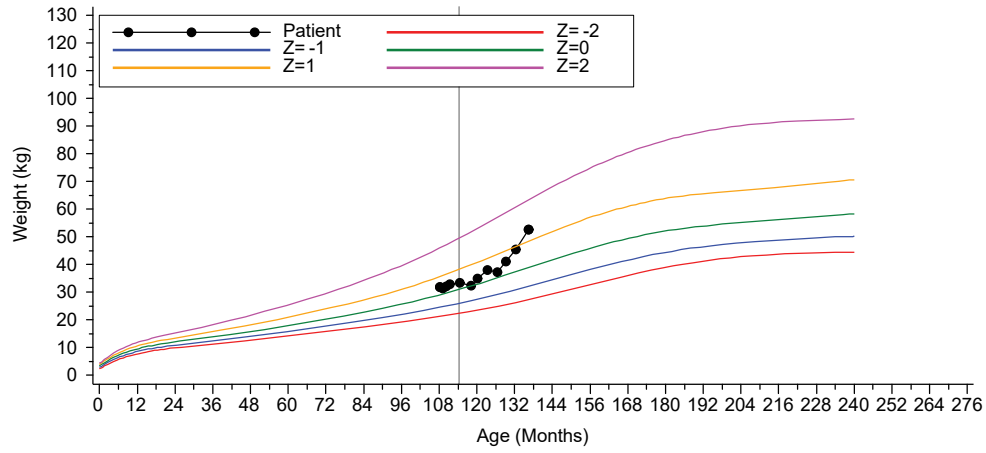

Patient 178  
Seizure History: Primary Generalized Seizures and Unknown

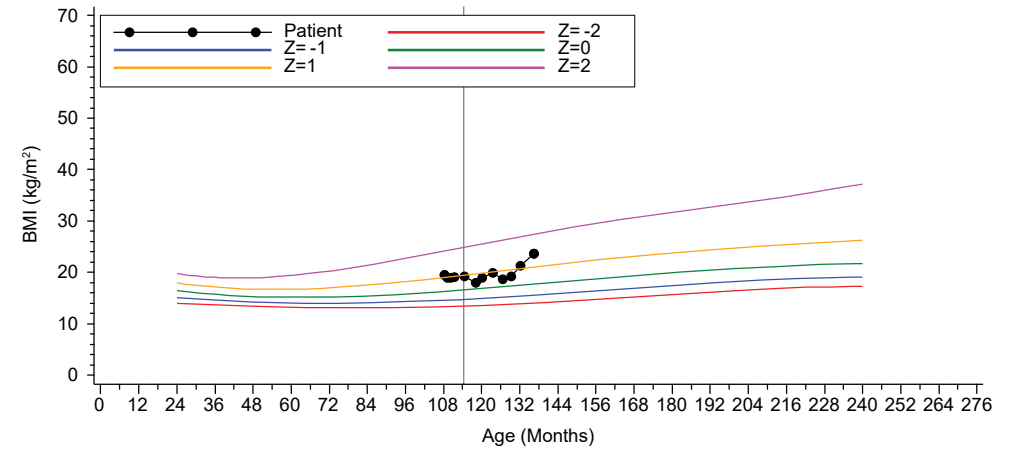

Patient 179

Seizure History: Primary Generalized Seizures and Unknown

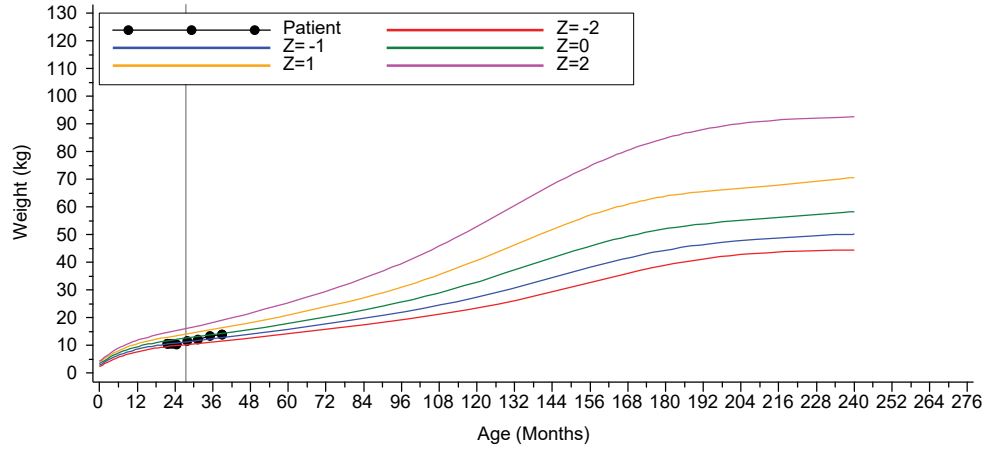

Patient 179

Seizure History: Primary Generalized Seizures and Unknown

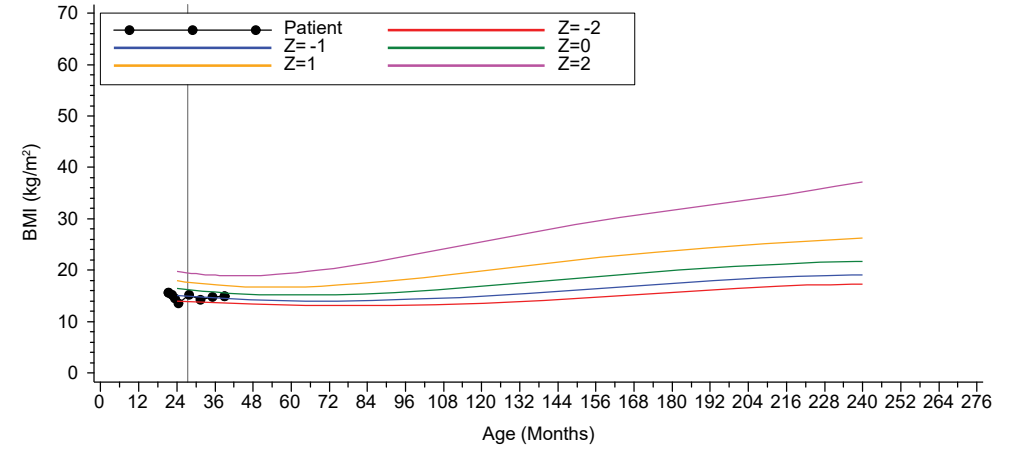

Patient 180

Seizure History: Primary Generalized Seizures and Unknown

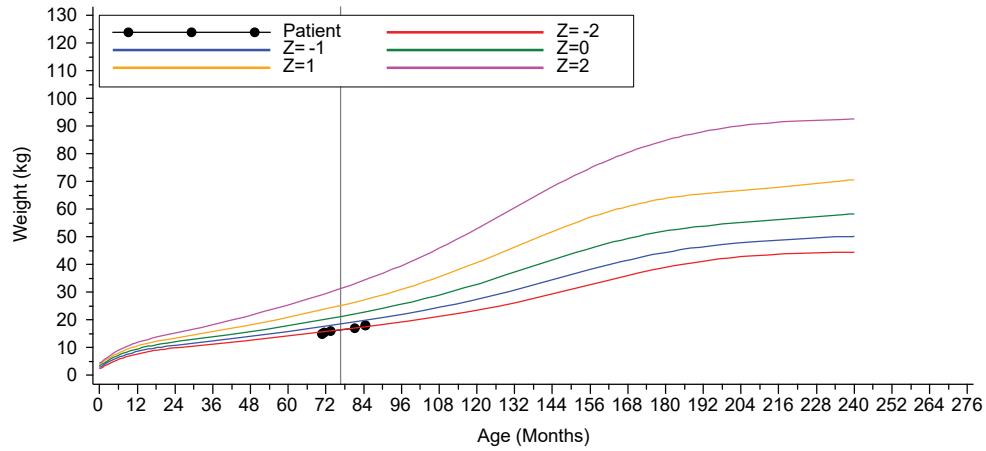

Patient 180

Seizure History: Primary Generalized Seizures and Unknown

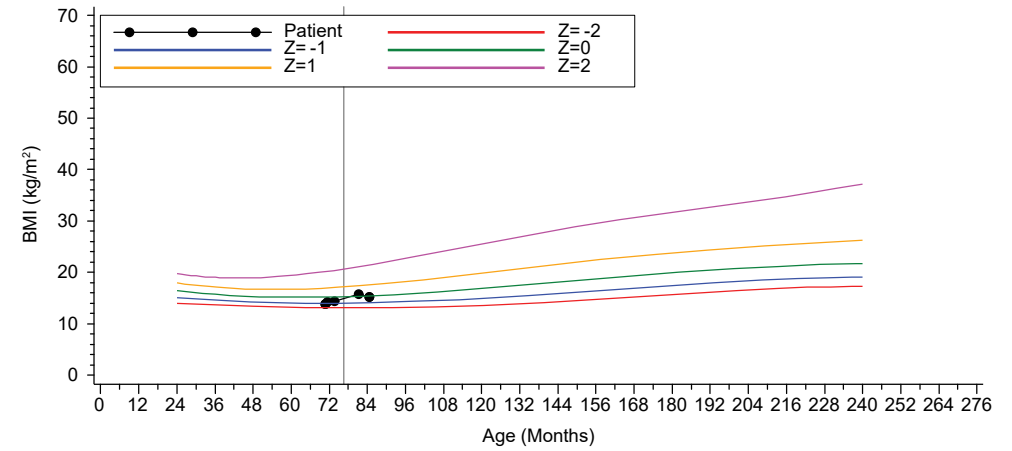

Patient 181  
Seizure History: Primary Generalized Seizures and Unknown

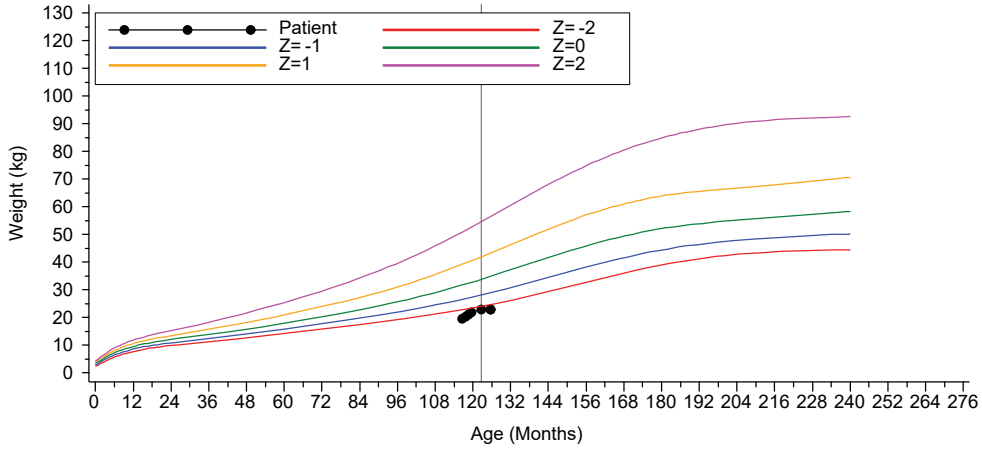

Patient 181  
Seizure History: Primary Generalized Seizures and Unknown

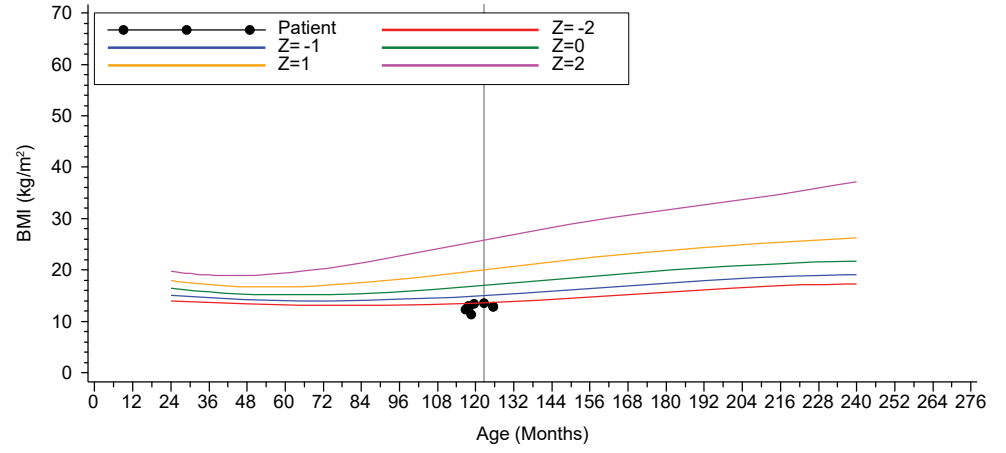

Patient 182  
Seizure History: Primary Generalized Seizures and Unknown

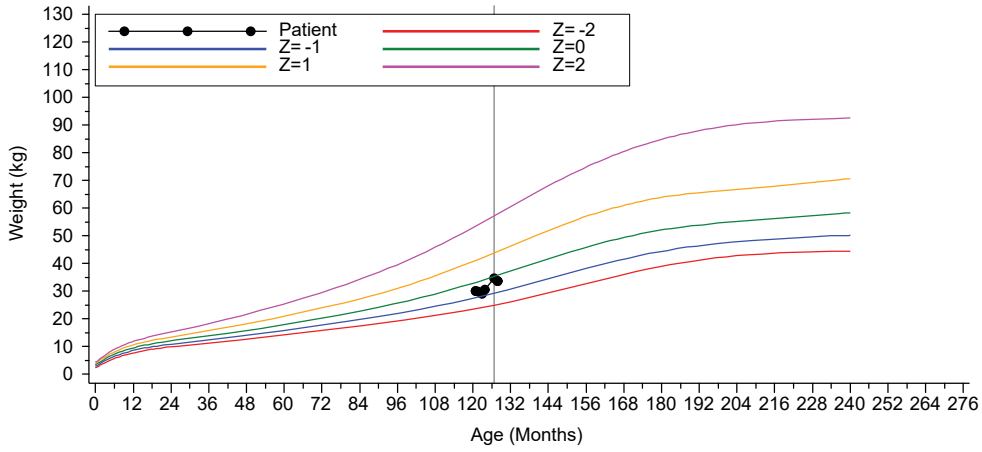

Patient 182  
Seizure History: Primary Generalized Seizures and Unknown

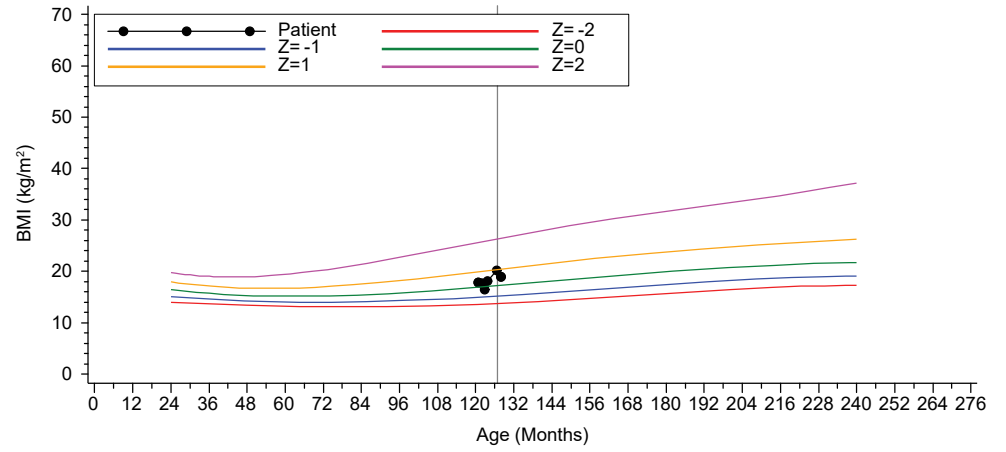

Patient 183  
Seizure History: Primary Generalized Seizures and Unknown

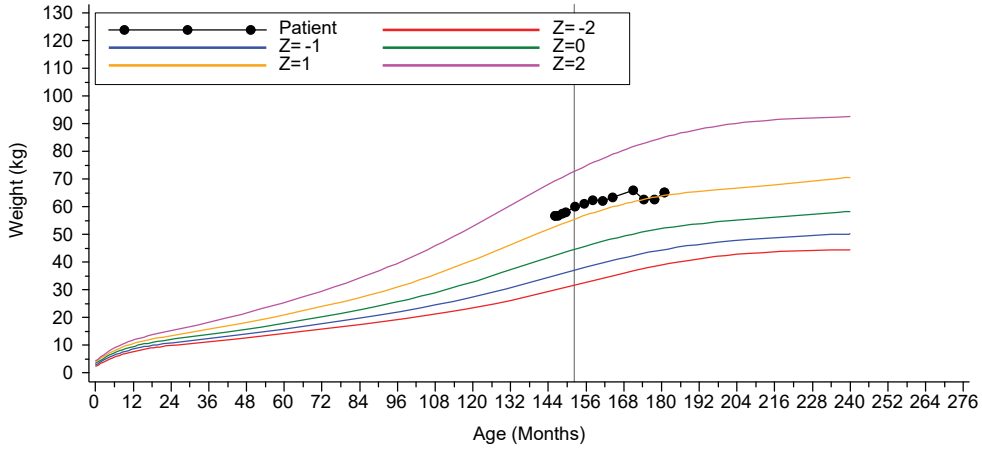

Patient 183  
Seizure History: Primary Generalized Seizures and Unknown

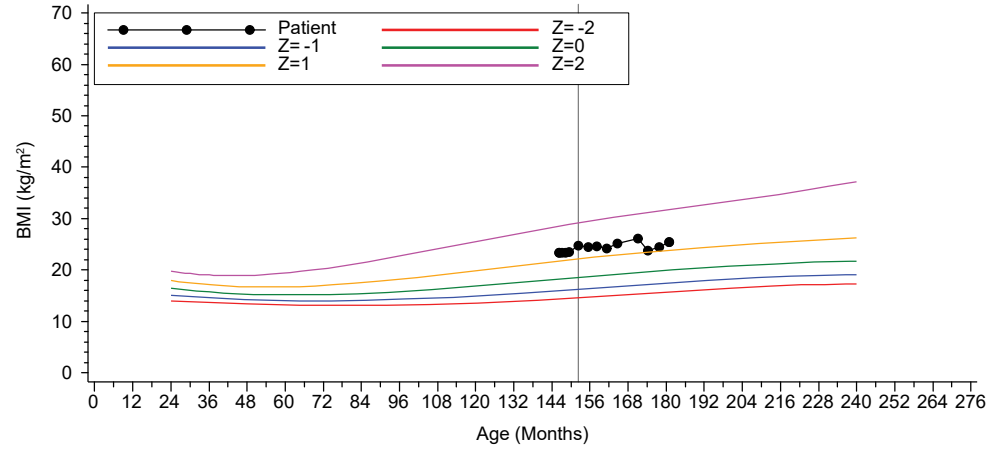

Patient 184  
Seizure History: Primary Generalized Seizures and Unknown

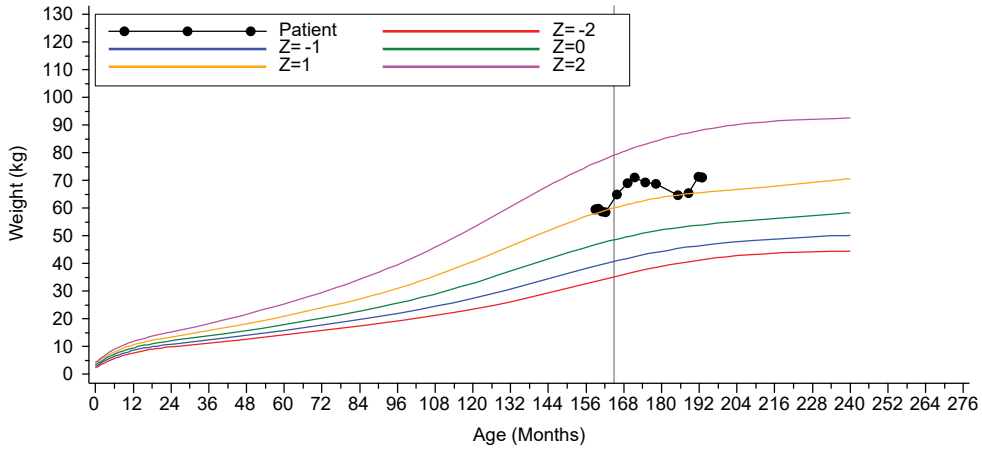

Patient 184  
Seizure History: Primary Generalized Seizures and Unknown

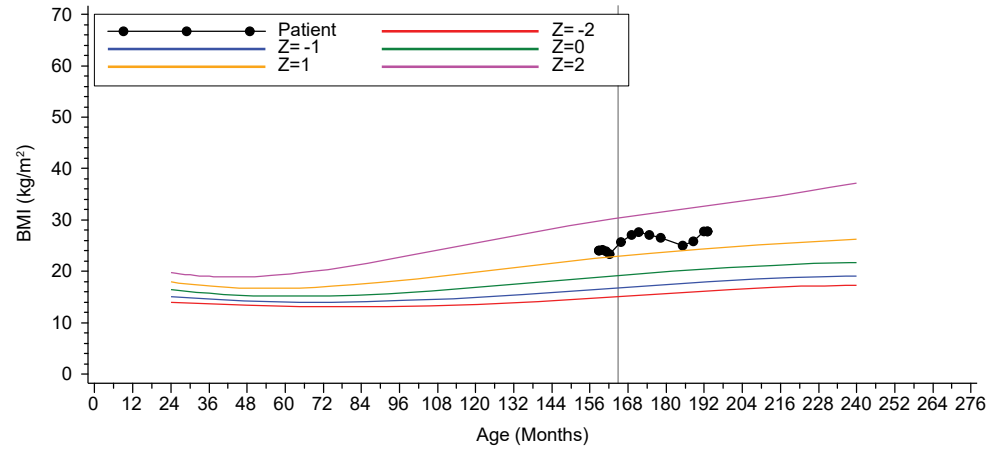

Patient 185  
Seizure History: Primary Generalized Seizures and Unknown

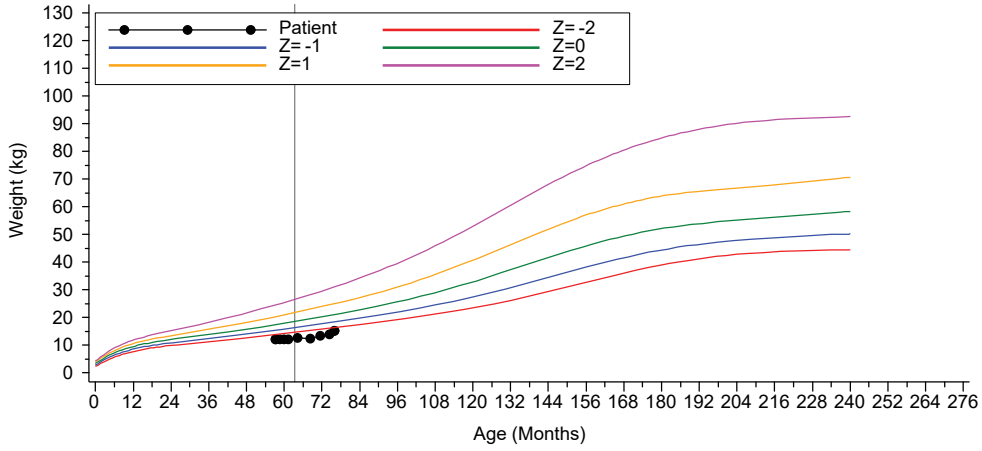

Patient 185  
Seizure History: Primary Generalized Seizures and Unknown

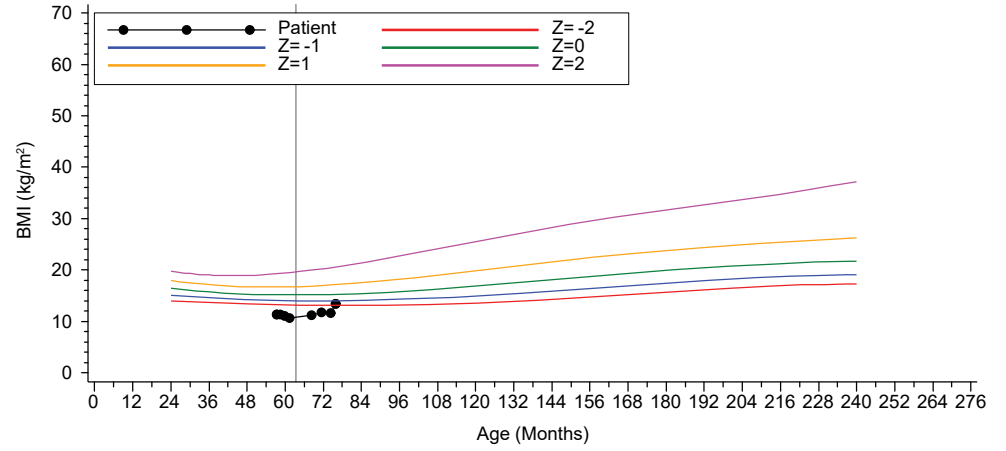

Patient 186  
Seizure History: Primary Generalized Seizures and Unknown

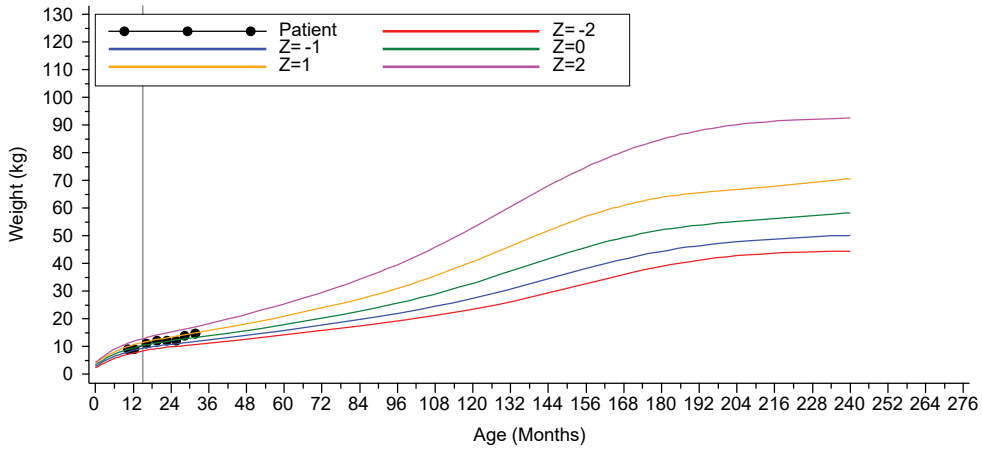

Patient 186  
Seizure History: Primary Generalized Seizures and Unknown

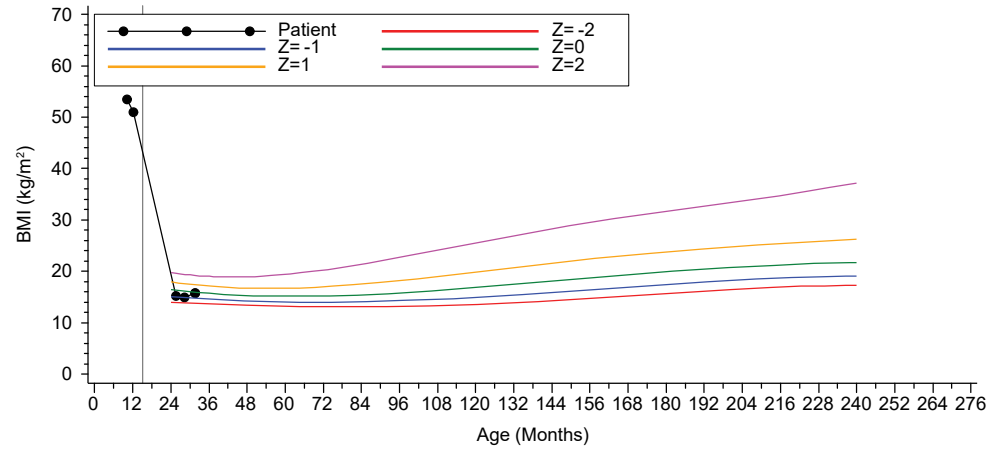

Patient 187  
Seizure History: Primary Generalized Seizures and Unknown

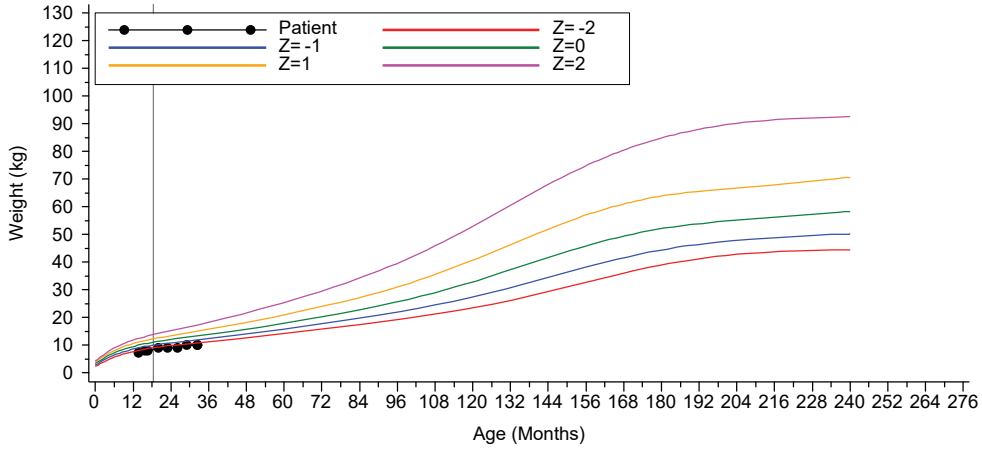

Patient 187  
Seizure History: Primary Generalized Seizures and Unknown

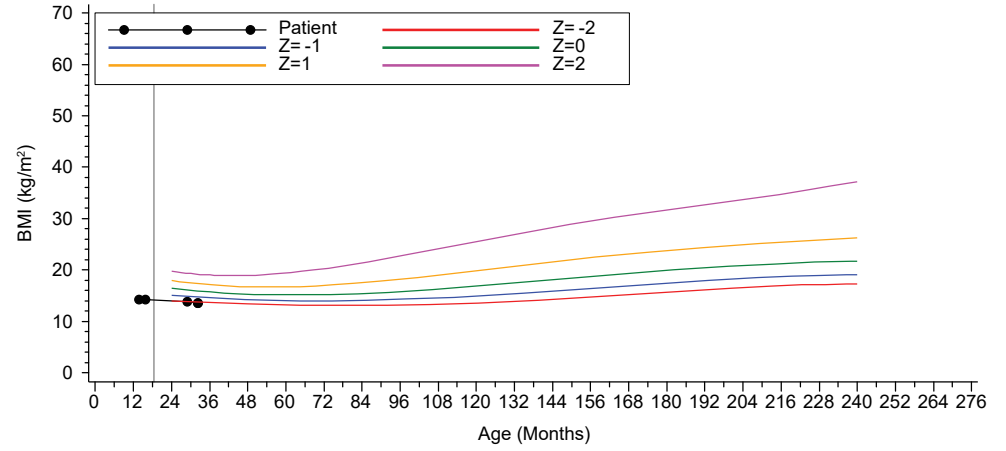

Patient 188  
Seizure History: Primary Generalized Seizures and Unknown

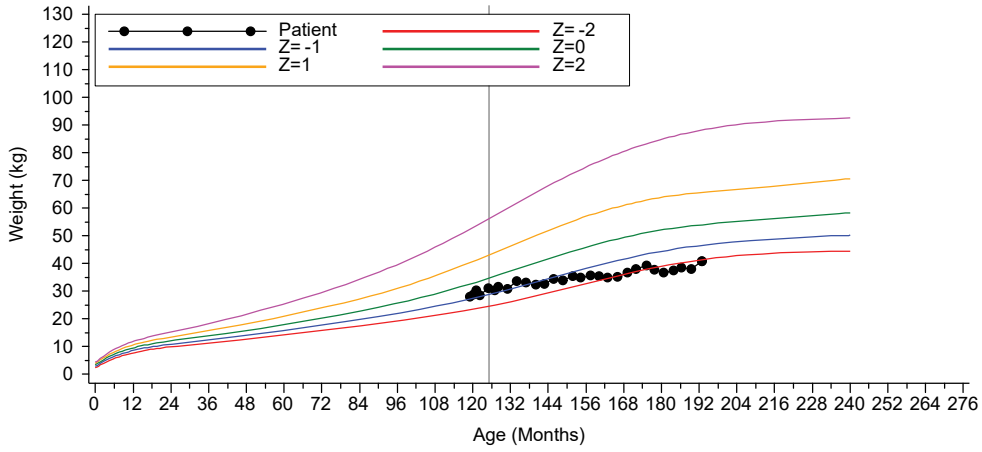

Patient 188  
Seizure History: Primary Generalized Seizures and Unknown

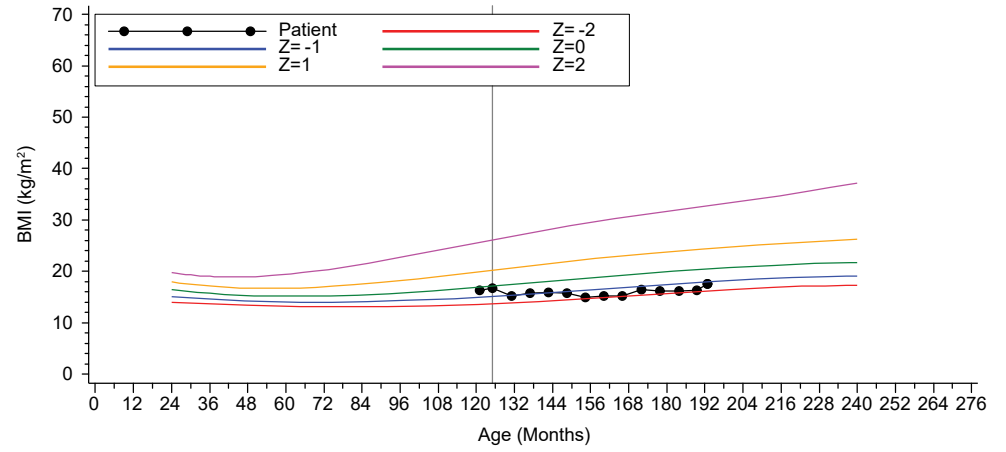

Patient 189  
Seizure History: Primary Generalized Seizures and Unknown

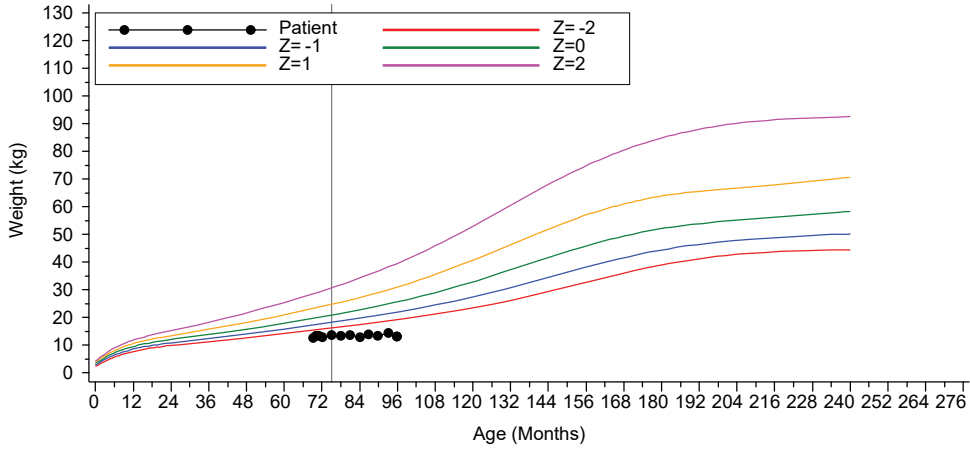

Patient 189  
Seizure History: Primary Generalized Seizures and Unknown

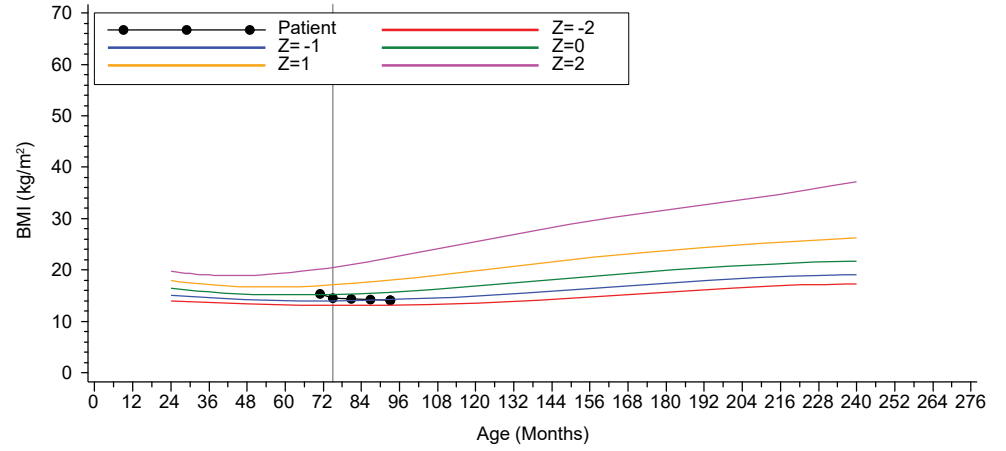

Patient 190  
Seizure History: Primary Generalized Seizures and Unknown

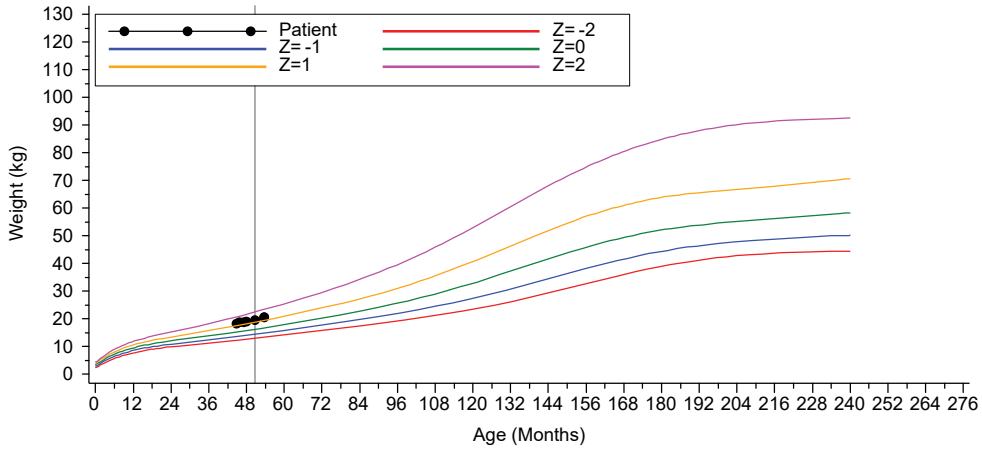

Patient 190  
Seizure History: Primary Generalized Seizures and Unknown

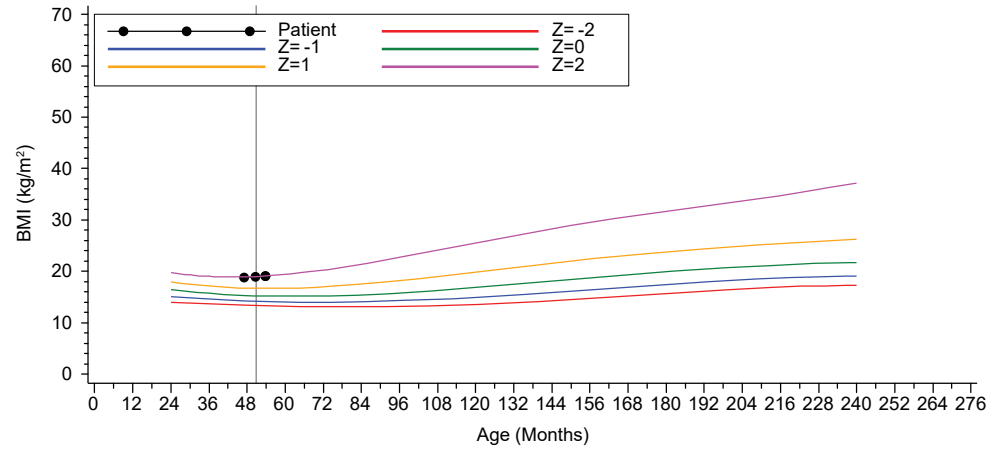



Patient 191  
Seizure History: Primary Generalized Seizures and Unknown

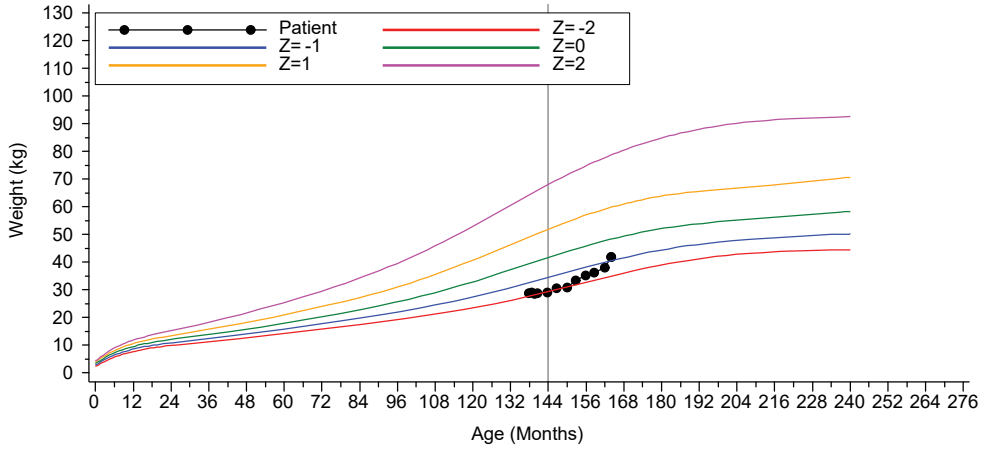

Patient 191  
Seizure History: Primary Generalized Seizures and Unknown

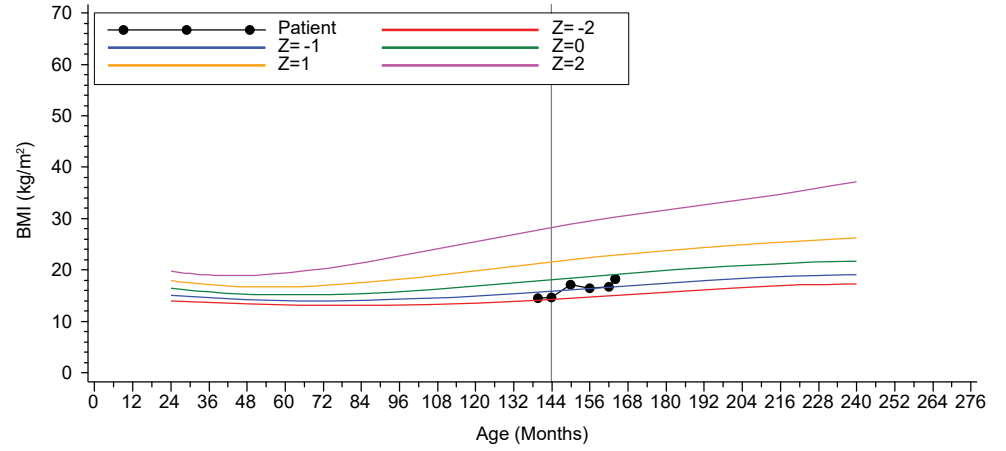

Patient 192  
Seizure History: Primary Generalized Seizures and Unknown

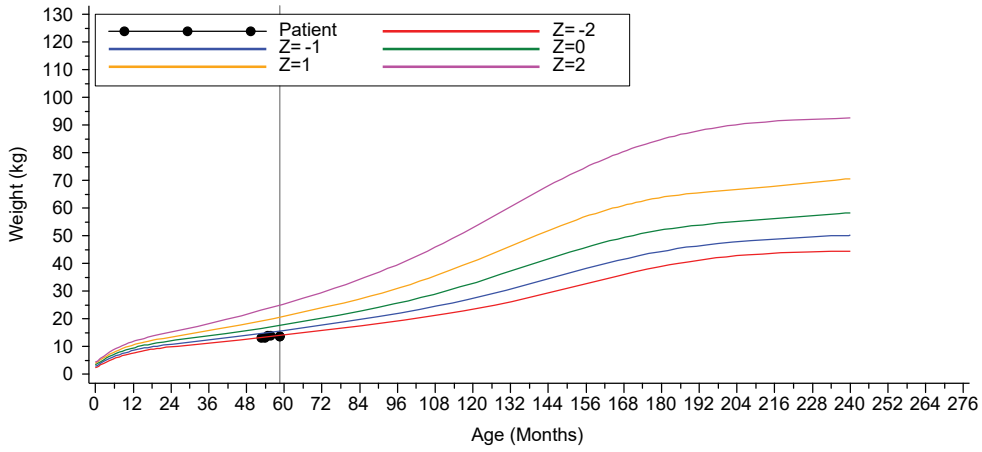

Patient 192  
Seizure History: Primary Generalized Seizures and Unknown

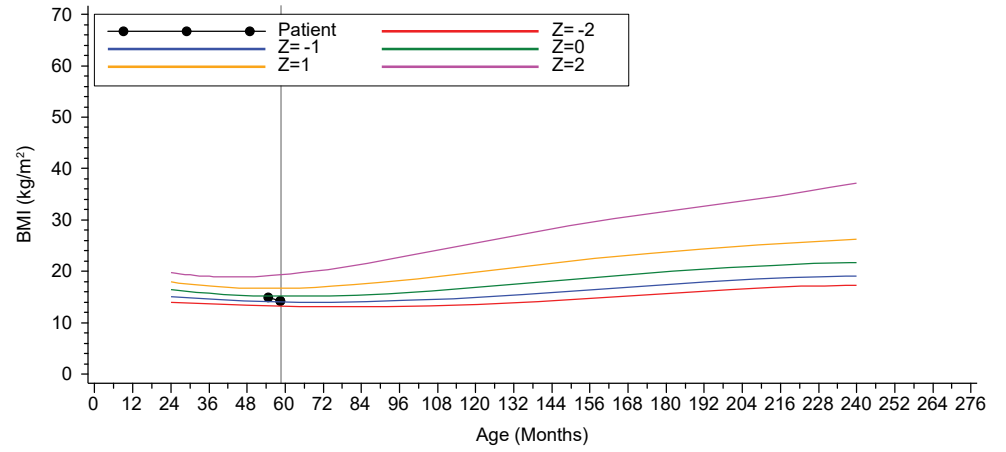

Patient 193  
Seizure History: Primary Generalized Seizures and Unknown

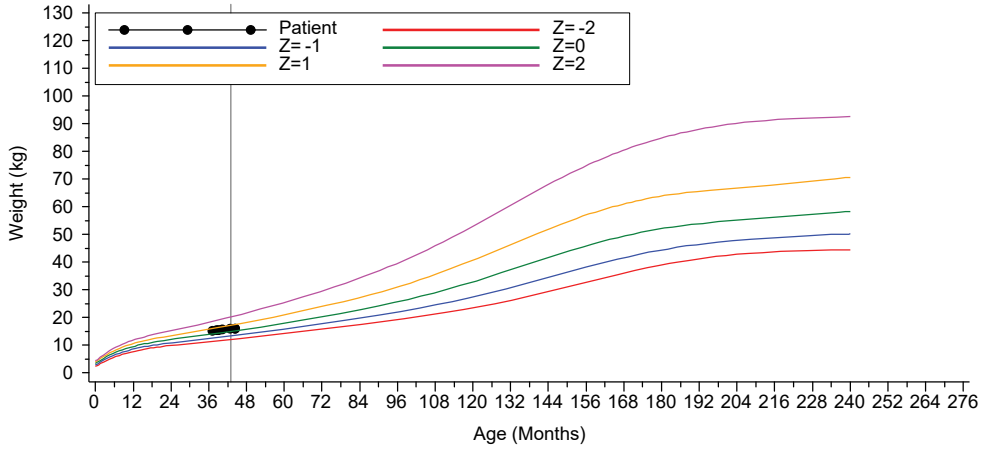

Patient 193  
Seizure History: Primary Generalized Seizures and Unknown

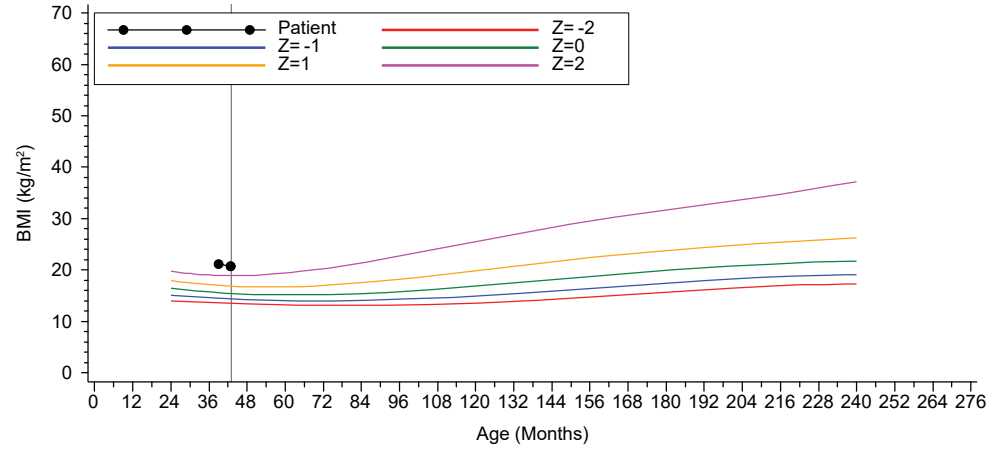

Patient 194  
Seizure History: Primary Generalized Seizures and Unknown

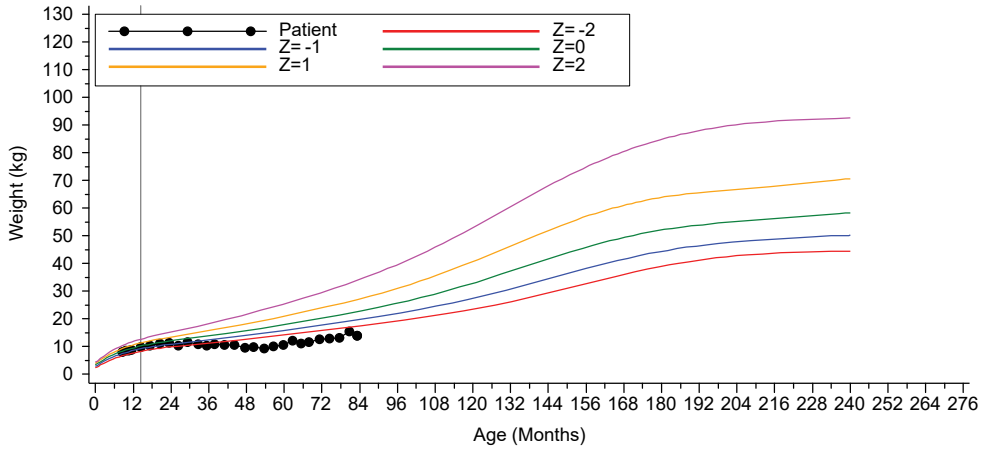

Patient 194  
Seizure History: Primary Generalized Seizures and Unknown

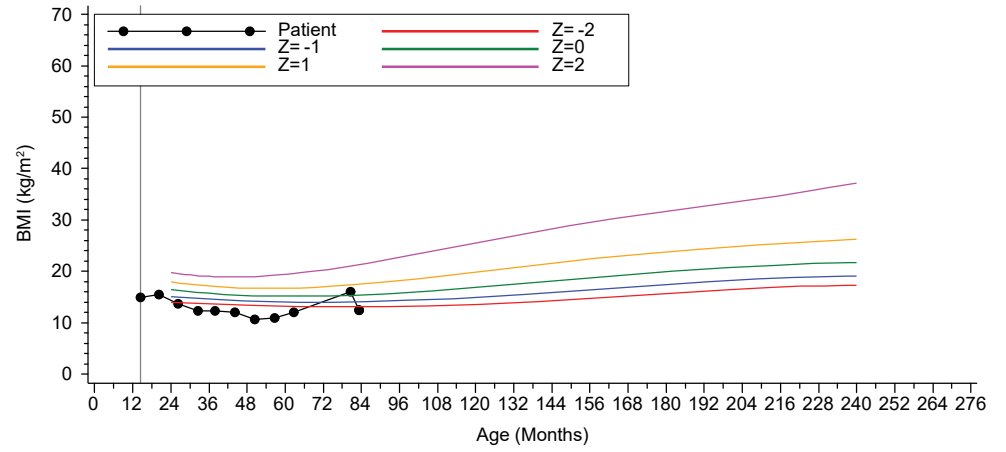

Patient 195  
Seizure History: Primary Generalized Seizures and Unknown

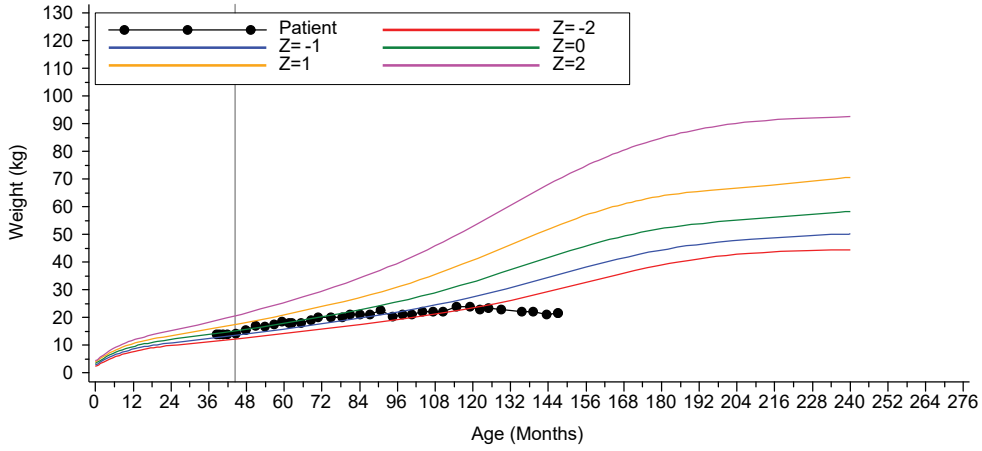

Patient 195  
Seizure History: Primary Generalized Seizures and Unknown

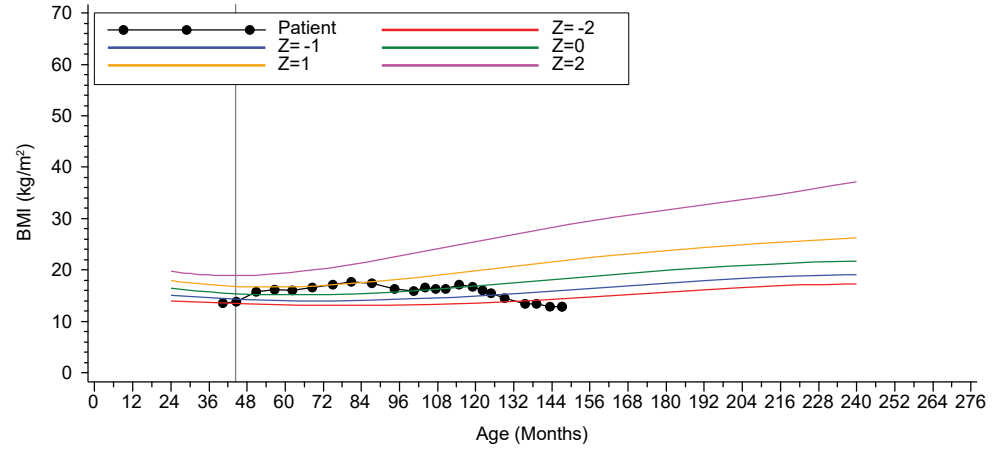

Patient 196  
Seizure History: Primary Generalized Seizures and Unknown

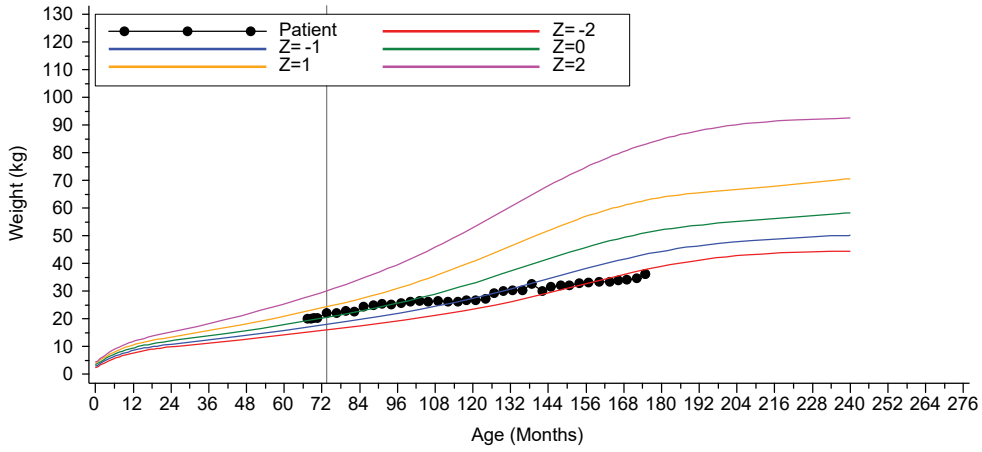

Patient 196  
Seizure History: Primary Generalized Seizures and Unknown

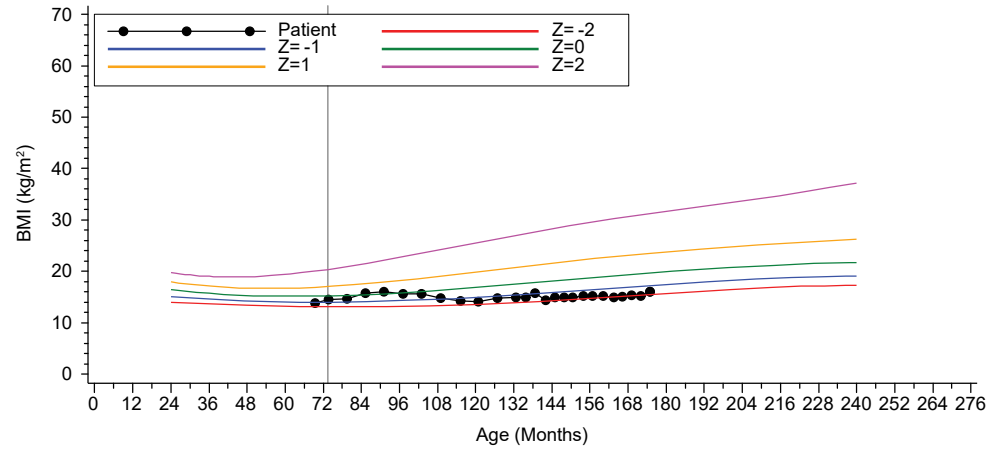

Patient 197

Seizure History: Primary Generalized Seizures and Unknown

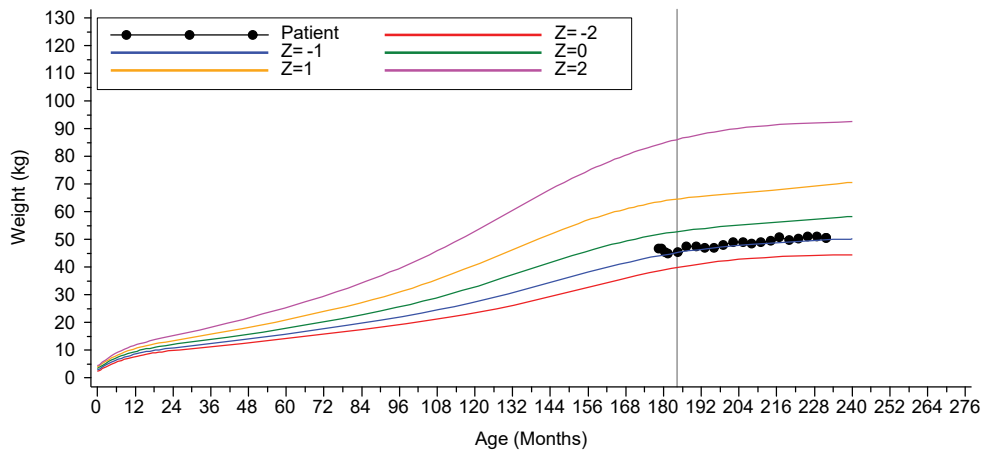

Patient 197

Seizure History: Primary Generalized Seizures and Unknown

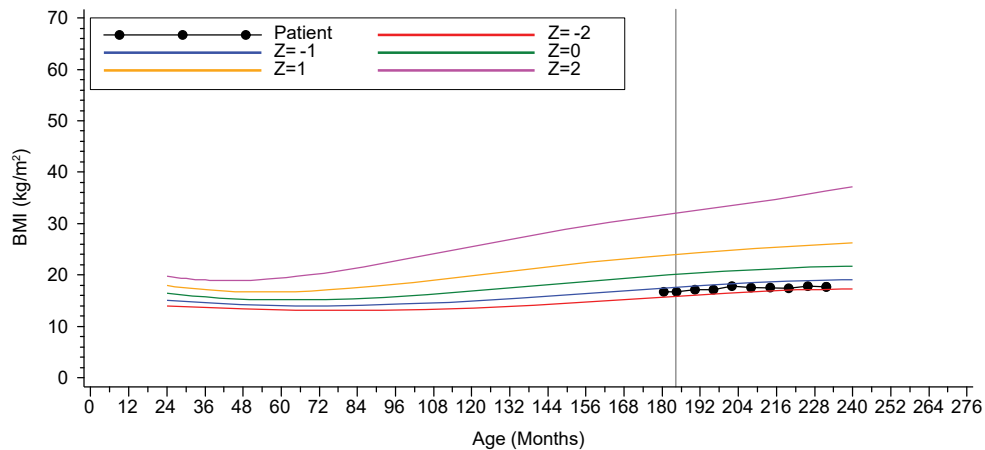

Patient 198

Seizure History: Primary Generalized Seizures and Unknown

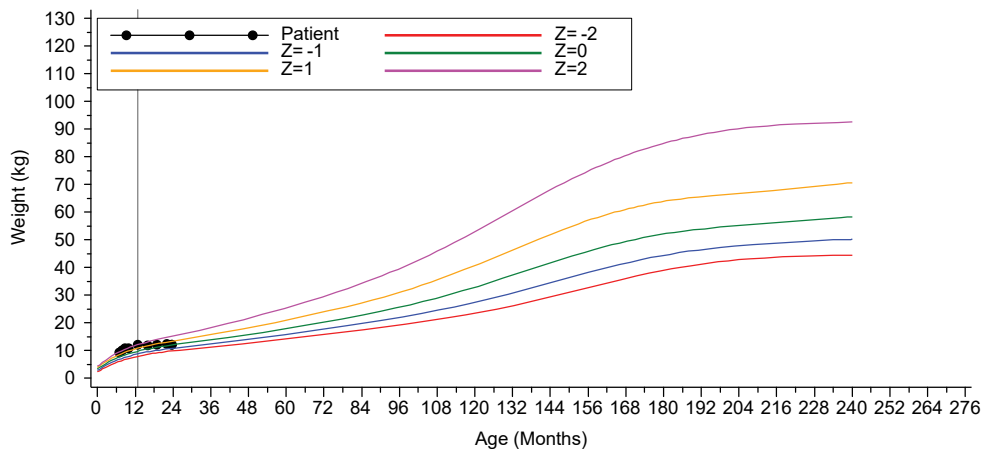

Patient 198

Seizure History: Primary Generalized Seizures and Unknown

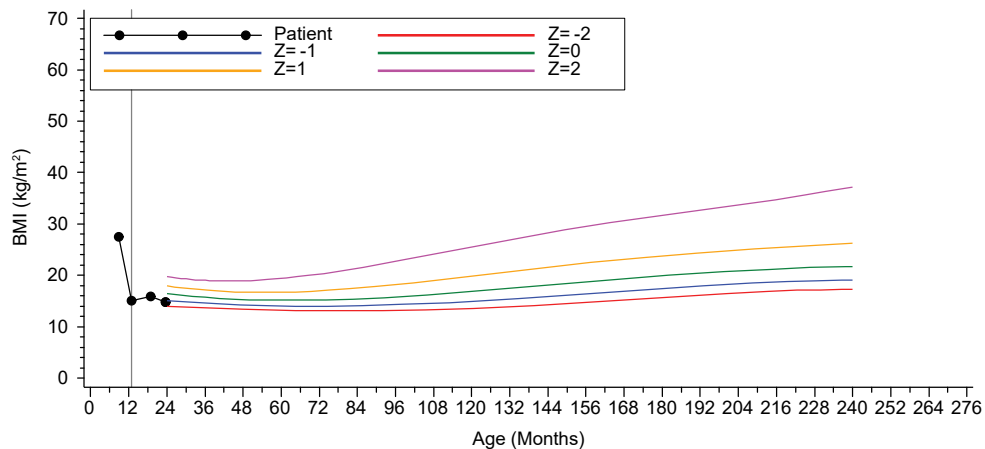

Patient 199

Seizure History: Primary Generalized Seizures and Unknown

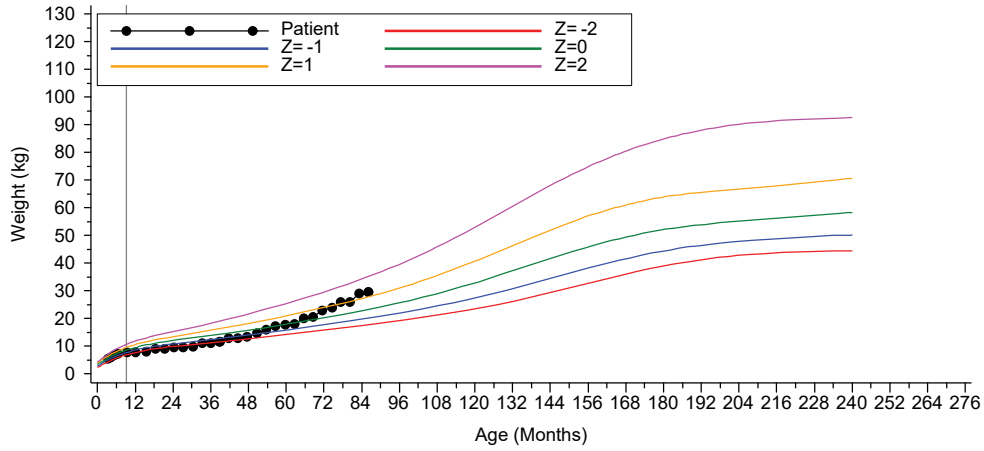

Patient 199

Seizure History: Primary Generalized Seizures and Unknown

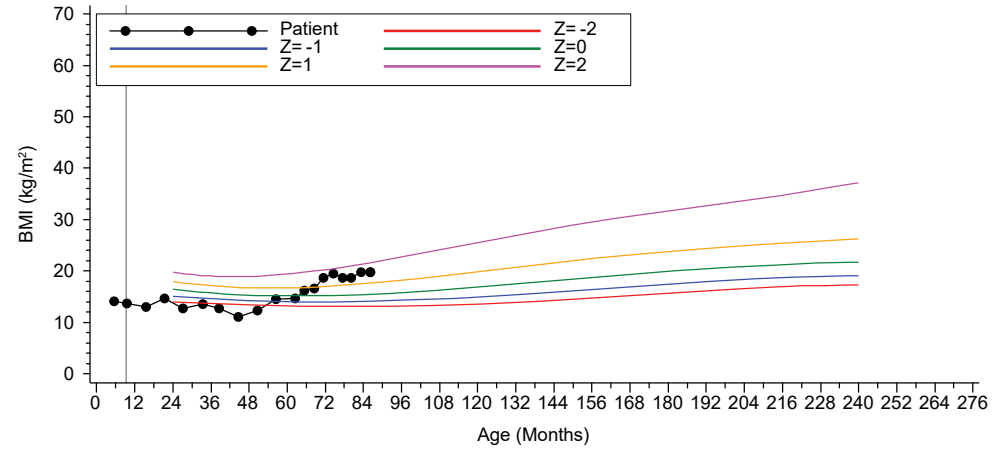

Patient 200

Seizure History: Primary Generalized Seizures and Unknown

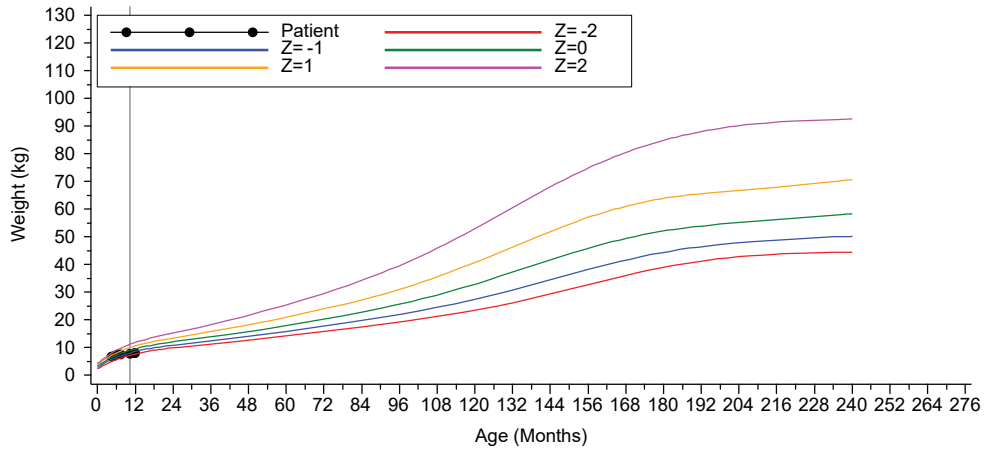

Patient 200

Seizure History: Primary Generalized Seizures and Unknown

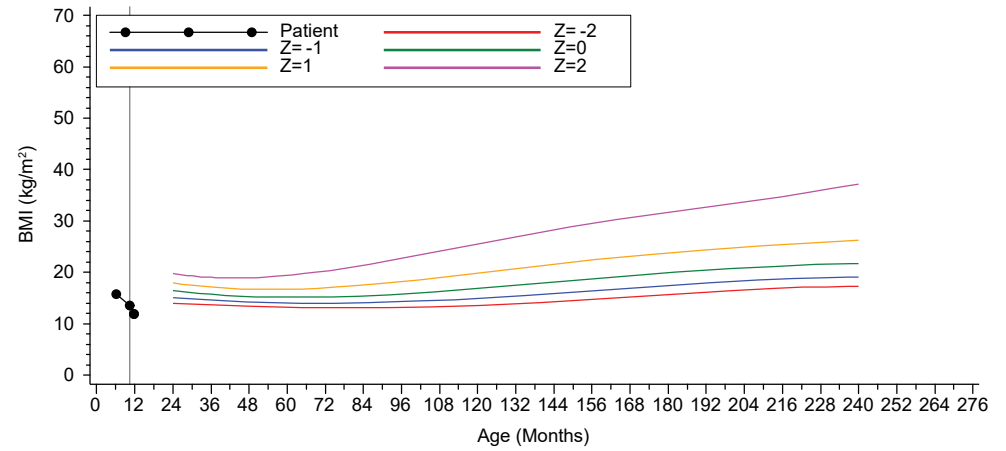

Patient 201

Seizure History: Primary Generalized Seizures and Unknown

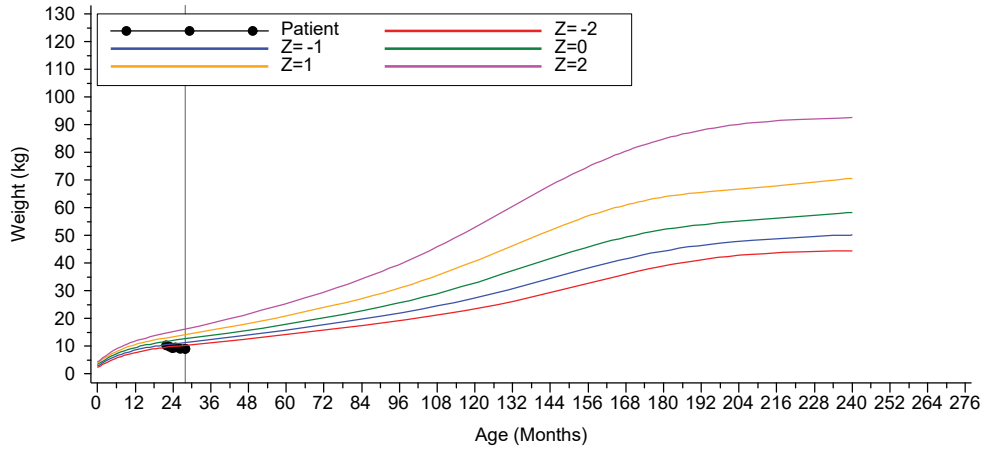

Patient 201

Seizure History: Primary Generalized Seizures and Unknown

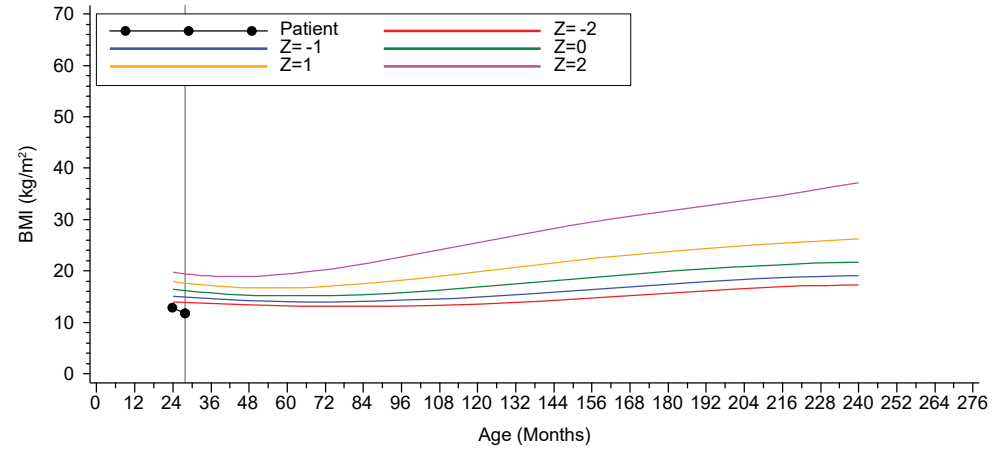

Patient 202

Seizure History: Primary Generalized Seizures and Unknown

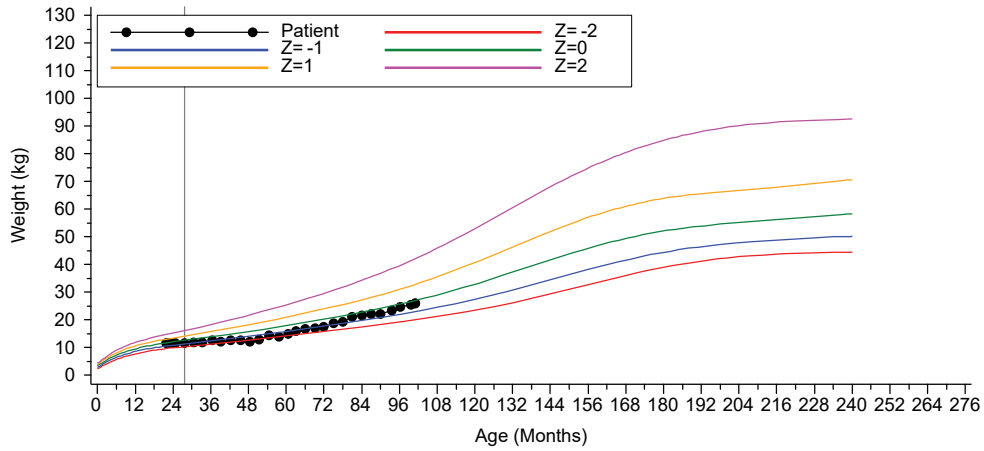

Patient 202

Seizure History: Primary Generalized Seizures and Unknown

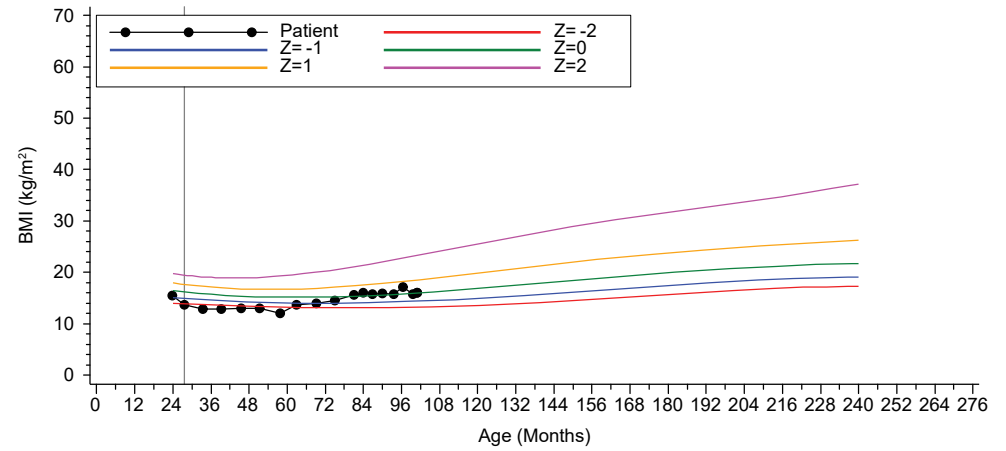

Patient 203

Seizure History: Primary Generalized Seizures and Unknown

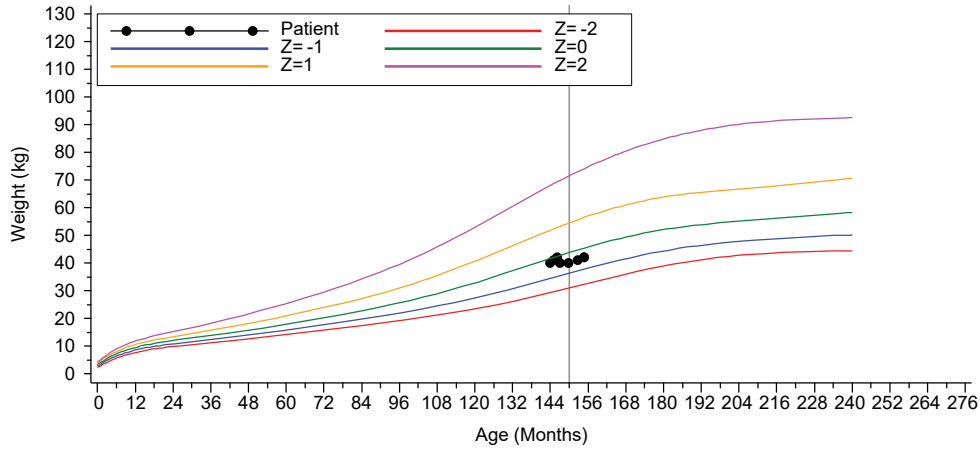

Patient 203

Seizure History: Primary Generalized Seizures and Unknown

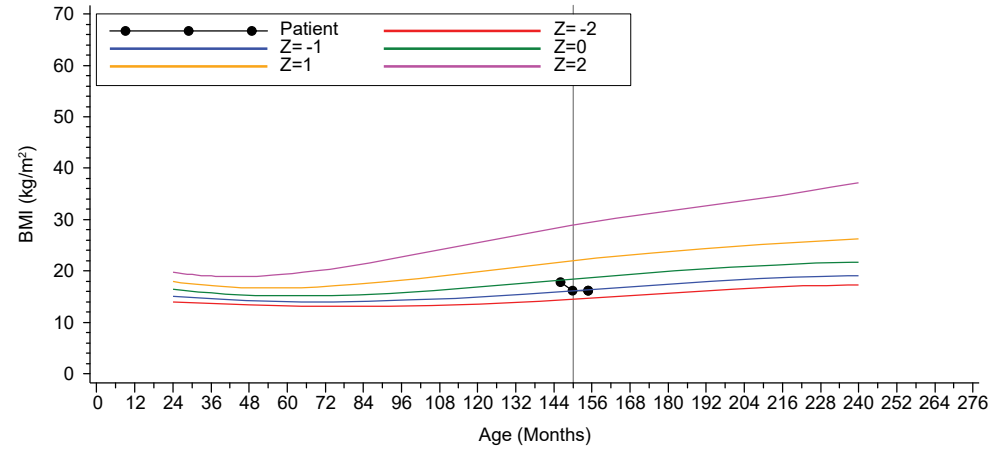

Patient 204

Seizure History: Primary Generalized Seizures and Unknown

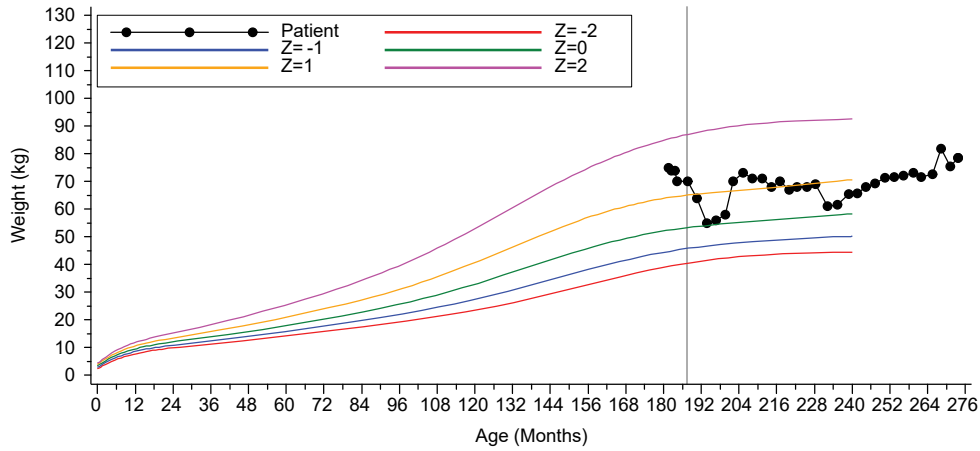

Patient 204

Seizure History: Primary Generalized Seizures and Unknown

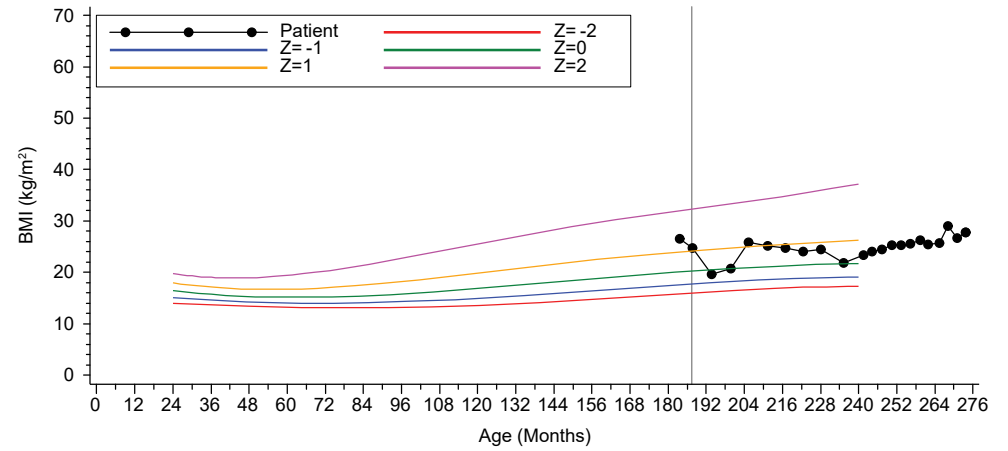

Patient 205  
Seizure History: Primary Generalized Seizures and Unknown

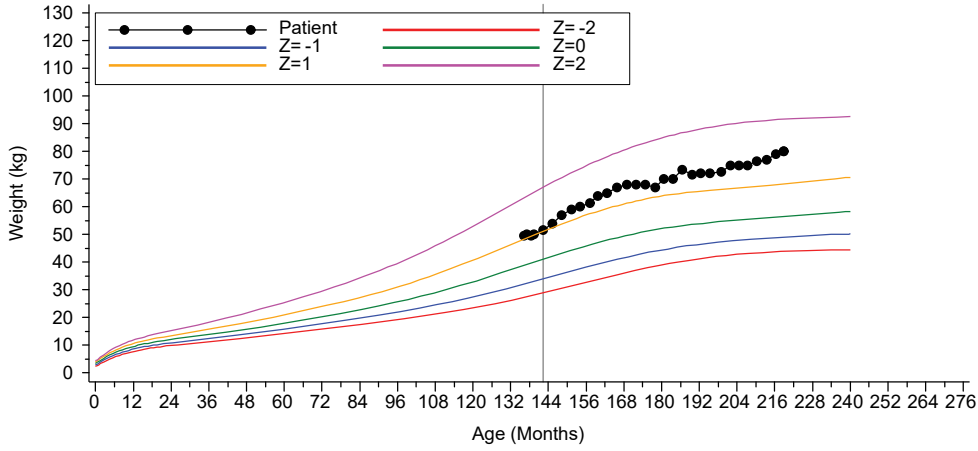

Patient 205  
Seizure History: Primary Generalized Seizures and Unknown

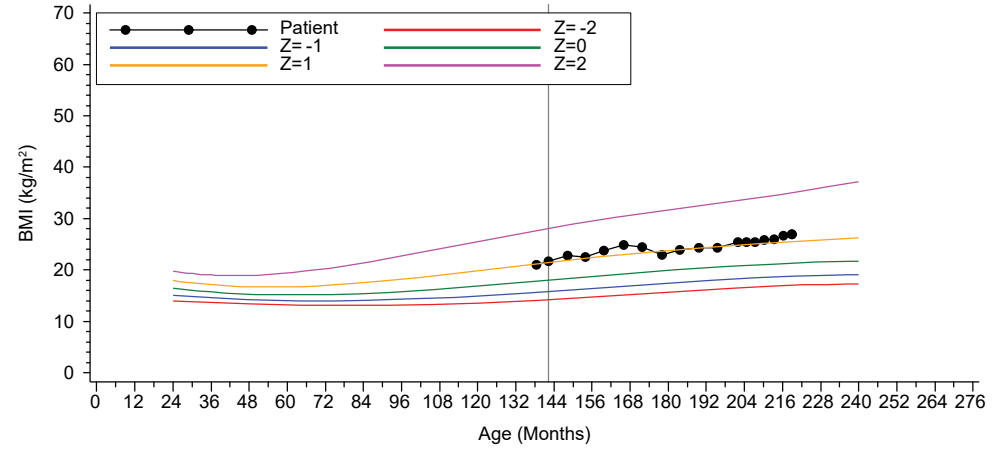

Patient 206  
Seizure History: Primary Generalized Seizures and Unknown

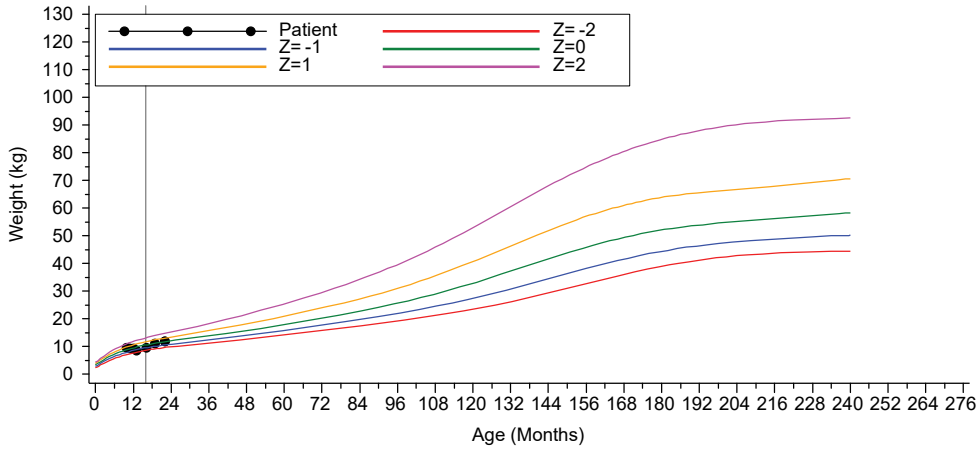

Patient 206  
Seizure History: Primary Generalized Seizures and Unknown

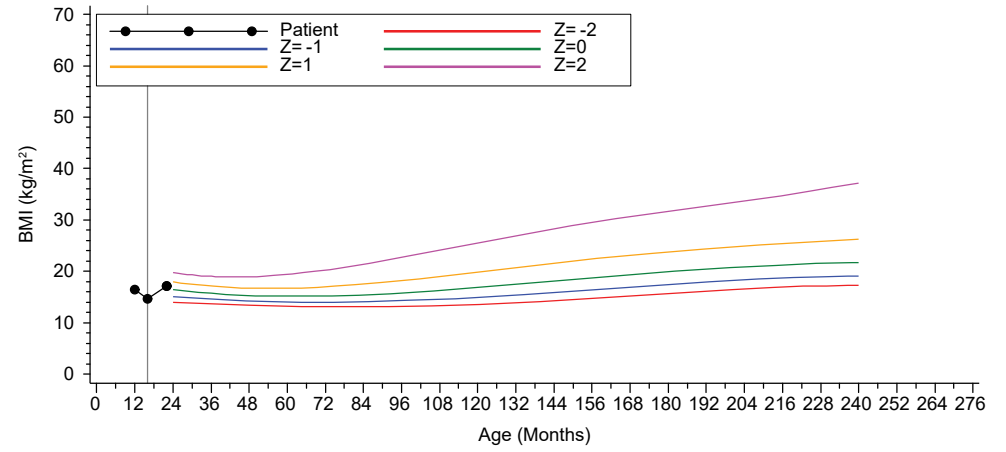



Patient 207  
Seizure History: Primary Generalized Seizures and Unknown

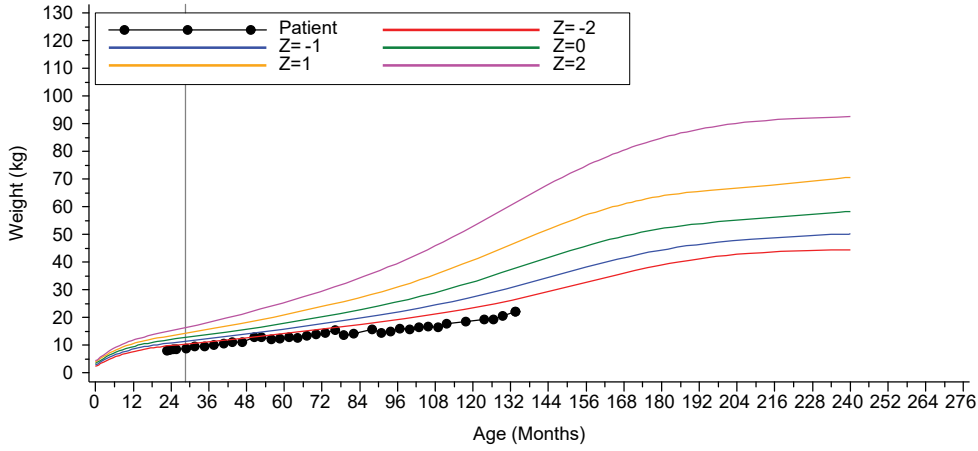

Patient 207  
Seizure History: Primary Generalized Seizures and Unknown

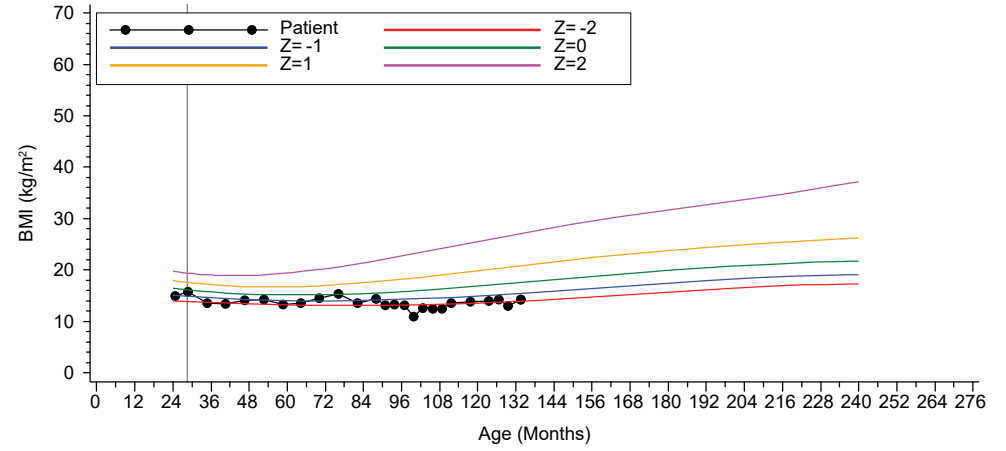

Patient 208  
Seizure History: Primary Generalized Seizures and Unknown

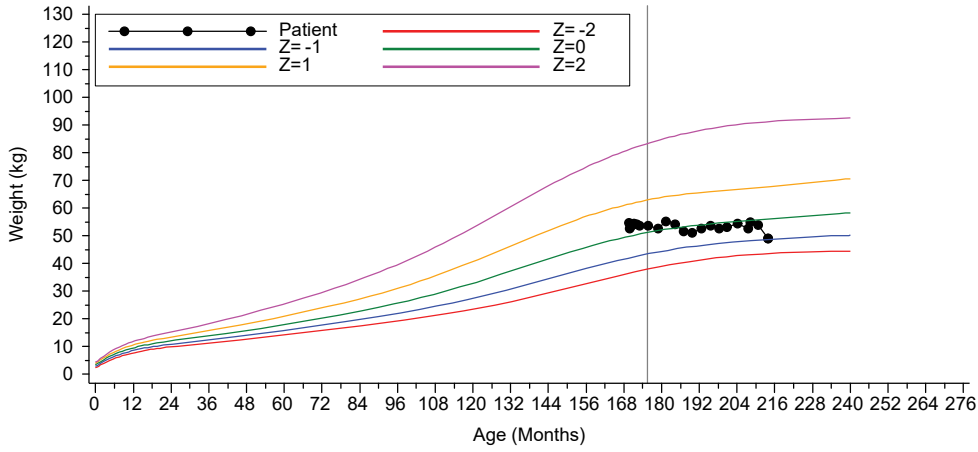

Patient 208  
Seizure History: Primary Generalized Seizures and Unknown

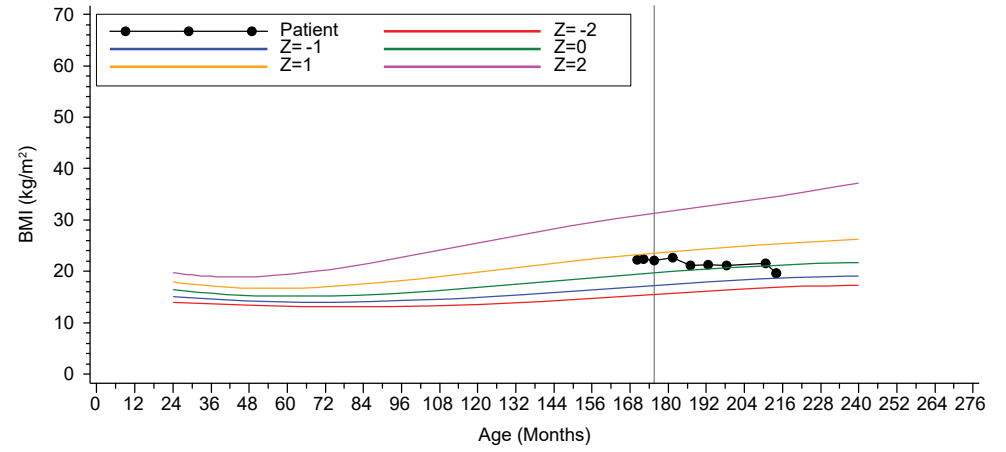

Patient 209

Seizure History: Primary Generalized Seizures and Unknown

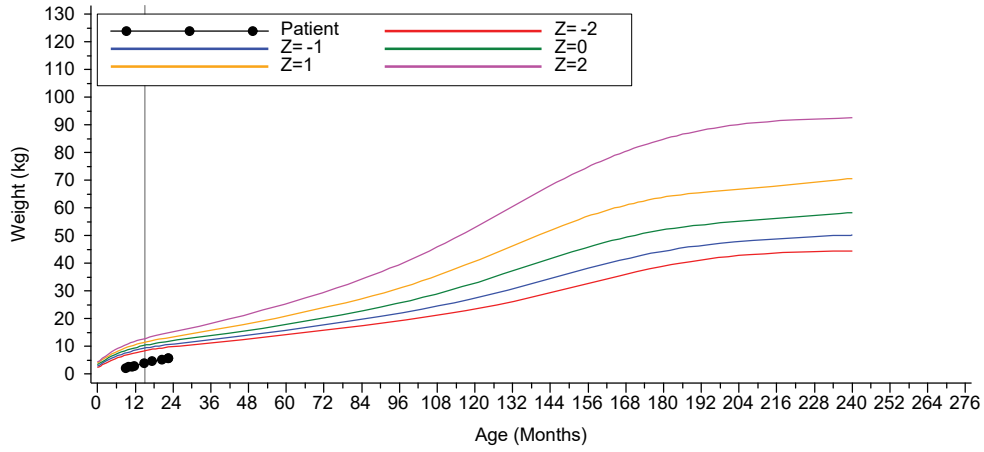

Patient 209

Seizure History: Primary Generalized Seizures and Unknown

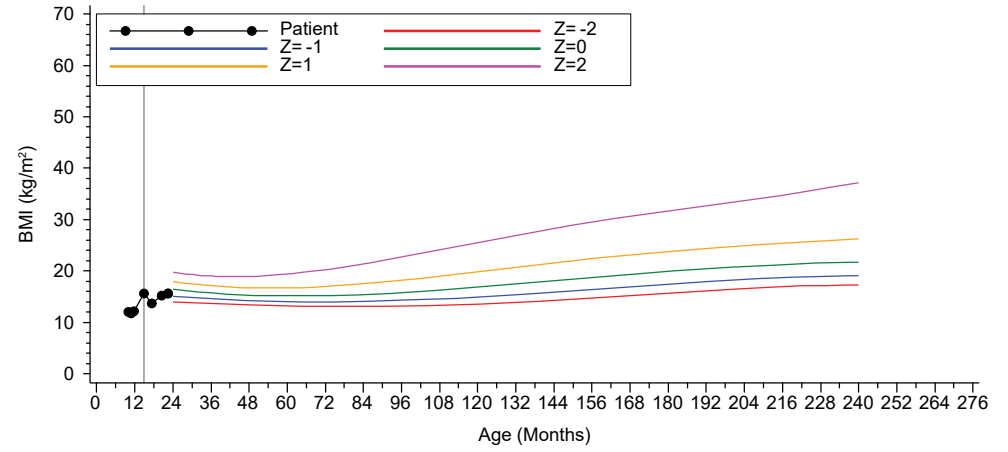

Supplement: EPI4-9-2230-s003.pdf [file EPI4-9-2230-s003.pdf]
