# Supplementary material for: Treatment with brivaracetam has no apparent long‐term effects on body weight in pediatric patients with epilepsy
Source: PubMed Central journal article supplement (PMC11633704; doi:10.1002/epi4.13045), 2024-10-02
Supplement: EPI4-9-2230-s001.pdf [file EPI4-9-2230-s001.pdf]

# Treatment with brivaracetam has no apparent long-term effects on body weight in pediatric patients with epilepsy

Florin I. Floricel | Paula E. Reichel | Najla Dickson | Sofia Fleyshman | Christoph Reichel | Jan-Peer Elshoff

**TABLE S1** Definitions of growth status for weight and BMI compared with equivalent percentiles and z-scores.<sup>a</sup>

| Percentile   | z-score  | Weight                            | BMI                           |
|--------------|----------|-----------------------------------|-------------------------------|
| ≥97th        | ≥2       | Overweight                        | Obesity                       |
| 85th to 97th | 1 to 2   | Normal                            | Overweight                    |
| 3rd to 97th  | -2 to 2  | Normal                            | Normal                        |
| 3rd to 16th  | -2 to -1 | At risk for underweight           | At risk for underweight       |
| <3rd         | -2 to -3 | Moderate underweight              | Moderate underweight          |
| <3rd         | <-3      | Severe malnutrition (underweight) | Severe malnutrition (wasting) |

<sup>a</sup>Adapted from Table 3 of Sentongo, 2019.<sup>1</sup>

Abbreviations: BMI, body mass index.

<sup>1</sup>Sentongo T. A new approach to comprehensive growth and nutrition assessment in children. *Pediatr Ann* 2019;48(11):e425–e33.
